# Supplementary material
Source: PubMed Central journal article supplement (PMC1168766)
Supplement: jvirol_79_14_9270__1.pdf [file jvirol_79_14_9270__1.pdf]

## **Readme file for the Supplementary information**

### **Supp\_1 RetroTector©010 interpretation of the ERV3 7q11 locus and a discussion of the XonID findings.doc**

This describes features detected by RetroTector version 010 from this locus. Gag-, Pro-, Pol-, and Env proteins are defined. The putative XORF protein is discussed.

### **Supp\_2 A detailed list of the ERV3-like elements.**

This list contains all ERV3-like elements detected by RetroTector 010 in the human genome, version hg15. A larger subset of 76 ERV3-related sequences were first collected using similarity to the ERV3 7q11 Pol protein, and the BLASTlike protein similarity algorithm of RetroTector Shell version 01. This larger subset was further analysed by Clustal W 1.83 alignment of Pol proteins (Supp\_3a), a cladogram using the neighbor-joining method, and a crosswise similarity table of the Pol proteins (Supp\_4a). Using criteria described in the main text, 42 ERV3-like elements were defined.

### **Supp\_3a Clustal W 1.83 Alignment of ERV3-related elements.**

As described under Supp\_2, 76 ERV3-related sequences were aligned together with gammaretroviral reference sequences.

### **Supp\_3b Cladogram of ERV3-related elements with details.**

The alignment of Supp\_3a gave rise to a guide tree, based on the neighbor-joining method. Besides the chromosomal locations, the xx of each element are presented.

### **Supp\_4a. Similarity cross table of Pol of ERV3-related elements.**

The cross table shows that the 42 ERV3-like elements are separated from other similar elements, the HERV-E like and other gammaretroviruses. A similarity of 80% (shown in red; defined in Materials and Methods) delineates the ERV3-like sequences from the other. However, the division between ERV3-like and HERV-E like is not entirely clear. Some ERV3-like elements are more than 80% similar to the HERV-E like elements.

### **Supp\_4b. Similarity cross table of Env of ERV3-related elements.**

This was performed as described under Supp\_4a. Env is more divisive than Pol. The ERV3-like elements appear in two Env-defined subgroups.

**Supp\_5 Alignment of the ERV3 5' and 3' LTRs.**

The purpose of the alignment is to highlight differences between the two LTRs. Promoter function normally resides in the 5' LTR. Selection for Env expression should be accompanied by a functional 5' LTR.

**Supp\_6a. TFBS findings for the ERV3 LTRs from ConSite.**

Transcription factor binding sites were predicted using default settings.

**Supp\_6b. A map of the ERV3 LTR, with TFBS predictions plotted.**

Predicted transcription factor binding sites, and the degree of divergence between 5' and 3' LTRs, were plotted, together with U3, R and U5 borders. Likely TATAA and AATTAAA boxes are also indicated.

**Supp\_7. List of PBS sequences used by ERV3-like sequences.**

## RetroTector 010 interpretation of the ERV3 7q11 locus from hg15 (April 2003)

### RETROVID output:

ChainS1::

A:0.37

B:0.37

C:0.99

D:0.68

E:0.37

L:0.06

S:0.36

G:0.06

O:0.06

63858202

63848590

Type C Score= 1754

SubGene 5LTR, type C, score=90 , hotspot 63857663

5LT:ABCDELSGO (5'LTR): Score=90 at 63857663 frame 2 [63858202-63857610]

X scored against

tgaggcaggaaatataaaaggaaaaacaagtaaagggaaaacaagtccttcctgatcagtctgactcactccaaagtcctgctggag  
ctatgataacattatctgcaaggccaggcagggaccccaaaagaatgggctccaggagcagagatgagaaaaacaagttctccttacc  
agttcccgcttgaaattctttcccataccattattcttgttctgctctcacaactattttgtaactatttctgcaagtttgcaagatttcataa  
gttctctgttttcttctgtagcacggcaaggtcacaagacatgcttaagtaagatagggtcatgttgcaaatcctgttgtaaacctgtcac  
ggtatgattaactgtcttctgcttctgtaagactgcttctgctctcacaggttcatgccaaaaacctgacccgccctgttggttgcac  
gtataaaagtcaagccctgtcattgttcagggtcagcctttggatgttcacggctgggctgggtggtgcacctaataaaaatcctcctgttc  
caccaagtggctctccagcctcctgattccacaaca (593 bases)

SubGene PBS, type C, score=141 , hotspot 63857606

PBS:C (tRNAArg-ERV3, ver020308, Snakehead RV): Score=141 at 63857606 frame 2  
[63857606-63857589]

TGGtgagccagccaggag scored against

tggcgagccagccaggag (18 bases)

SubGene MA, type CD, score=158 , hotspot 63856864

MA1:E (WDSV): Score=1 at 63856864 frame 3 [63856864-63856841]

MGNssstp scored against

mvgksskp (24 bases)

MA2:D (HTLV, end of MA): Score=11 at 63856423 frame 3 [63856423-63856394]

iPPPYvepta scored against

tpppyvpiyp (30 bases)

MA3:ABCDELSGO (Exp Wills acid motif): Score=100 at 63856420 frame 3 [63856478-  
63856409]

K(1-5)K(10-25)!PPPY scored against

krkatrktsfagtsrgdrnppppy (70 bases)

SubGene CA, type C, score=61 , hotspot 63855756

CA0:ABCDELSTGO (CA Start NN): Score=14 at 63856095 frame 1 [63856095-63856006]  
CAStartNNData.txt scored against  
llhreapsphrsdvhfsdtksnvarlqta (90 bases)  
CA1:C (HERV E (4-1)): Score=33 at 63855756 frame 1 [63855756-63855691]  
seVIQGkEESPAkFHERLcEAY scored against  
levlqetnzspgqfyerlckaf (66 bases)

SubGene NC, type C, score=59 , hotspot 63855343  
NC1:C (S71): Score=59 at 63855343 frame 3 [63855343-63855302]  
CtyCkqiGHwkkEC scored against  
caqckkrghwkgec (42 bases)

SubGene Prot, type C, score=151 , hotspot 63855094  
PR2:C (MuLV, motif A): Score=45 at 63855094 frame 3 [63855094-63855065]  
lvDTGAqhSv scored against  
mvdtdgaehlv (30 bases)  
PR3:C (MuLV, motif B): Score=56 at 63854905 frame 3 [63854905-63854882]  
llGRdllt scored against  
llgrdllq (24 bases)

SubGene RT, type C, score=525 , hotspot 63854225  
RT1:C (MLV): Score=58 at 63854501 frame 2 [63854501-63854472]  
wNtPllpVKK scored against  
wntplllvqk (30 bases)  
RT2:C (MLV): Score=87 at 63854330 frame 2 [63854330-63854289]  
tvldLkDaFFclrL scored against  
tvldlkdaffclyl (42 bases)  
RT3:C (MLV): Score=85 at 63854225 frame 2 [63854225-63854181]  
qltWtrLPQGfknSP scored against  
qlawtslpqgfkns (45 bases)  
RT4:C (MLV): Score=61 at 63854111 frame 2 [63854111-63854082]  
lqYvDDLlla scored against  
lqyidnllla (30 bases)  
RT5:C (MLV): Score=59 at 63854018 frame 2 [63854018-63853989]  
GyrasakKaQ scored against  
gyrvskkkaq (30 bases)

SubGene IN, type C, score=110 , hotspot 63852376  
IN5:C (MuLV, motif D): Score=14 at 63852215 frame 2 [63852215-63852192]  
gtDNgpaF scored against  
gsdnrlaf (24 bases)  
IN6:C (HERV-E): Score=45 at 63852131 frame 2 [63852131-63852084]  
AYqPQSsgKVERmnrt scored against  
ayrlqslgkvecmnwt (48 bases)  
IN7:C (BAEV): Score=15 at 63851738 frame 2 [63851738-63851691]  
eprWkGPyiVLttpt scored against  
gpiwdglhtvilsipt (48 bases)

SubGene SU, type C, score=82 , hotspot 63849885  
SU3:C (HERV-E): Score=82 at 63849885 frame 1 [63849885-63849844]

KRgiviGnWkdnew scored against  
krgitigdwkdnew (42 bases)

SubGene TM, type C, score=181 , hotspot 63849657

TM3:C (HERV E/ERV3): Score=100 at 63849651 frame 1 [63849651-63849616]

yQNRLALDYLLA scored against

yqnrldylla (36 bases)

TM5:ABCDELSGO (hydrophobic motif): Score=37 at 63849414 frame 1 [63849414-63849379]

X scored against

ivlailgvclil (36 bases)

SubGene 3LTR, type C, score=90 , hotspot 63848643

3LT:ABCDELSGO (3'LTR): Score=90 at 63848643 frame 1 [63849181-63848590]

X scored against

tgaagcaggaaatataaaaggaaaaacaagtaaaggaaaacaagtccttctgaccagtctgactcactccaaagtctgctggag  
ctatgataattatctgcaaggccaggcagggctccgaaggagtgggctccaggagcagggatgagaaaaacaagttctcttatcag  
tttcctgtttgaaattctctccccataacattattctttgtctgcttcacaactatcttgaactattctgcaagtctgtaaagatttgaagt  
tcttgttttcttctgtagcatggcaaggtcacaagacatgttaagtaaggtaggctcatgttgcaaatcctgttgtaaacctgtcacggt  
atgattaactgcctttgtctgcttctgtaagactgcttctcacctcgcaggttttgcgcaaaaaccgactgcccctgcctgatgcatgt  
ataaaagtcaagcctgtctttgttcagggtcagcctttggatgtaatccgctgggccagtgggccacctaaataaaccttctgttga  
cccagtgatctctccggcctctgattcccacaaca (592 bases)

Integration sites tata/tg<>ca/tata

**ORFID output:**

**Gag defined by ORFID, 1338 [63856864]- 3068 [63855145]:**

MgGkSSKPIPLeCMLrNFKzDytGDYEikLTPqRLRTLCEIEWPsFNVGWLaEGTIDREkIgrV  
fKVVTGvGgQpGHPDQFPYIDSWLniVQtQPawLQPCLASycKtLiArAKPkVKekSASLSA  
TETKgKPqEKPVLQePAEEiETPPPYvPiyPPLPrTAPeQPDSdGDtLqATPqRGkSEPPPqEvk  
kESqDdqaGRLRPGhTRvwQMPIRETRGPiYYDEQGGQFkGGQPTFIYqPFSstDLLNWKhHT  
PysSYTEKPQALTDLMQSiFQTqNPTWpDCKQLLLTLFNTEEcRRVtQAALhWLEHNAPE  
gtLNvQaymLRQFPeasiHWDpNDAAqlqyLQrYwEALLqGLKeGGKKAVNtgKileVLQETn  
zSPGQFYERLCKAFzLYTPFDTEAtENQcMvNAeFVGQAqgDIRRKLQKLEcftGmNATQ  
LLevAtKVYvnRnQEKERLIRIKKkADLLvavLTgReTSIASGcGhShGhGGvQARQRPEsQP  
RLcrNQCAqCKKRGHWKgECPEGNEEndrkyTGKIPAKgyCVPRESDTyLirLaGTGeyedza  
rlGsfSIP

**gag DNA:**

atgggagggaggtcatcaaaacccatcccattagaatgtatgtaaggaactttaagtaagattatacaggggattatgagatcaagttga  
ccccccagaggttgagaactctctgtgaaatagaatggccctcttcaatggttgatggctggccgaaggaactatagatagggaaaaa  
attggccgtgtatthaaggtggtgactggggtcggaggacagccagggcatccagaccaatttccttatattgactcatggctaaatatag  
ttcaaacctcaactgcatggctgcagccttgcctggcttcttattgcaaacgctcatagctcagccaagcctaaagtaaaagaaaaat  
cagcttactgtcagctacagagacaaaaggaaagccacaagaaaaaccagttttgaggaaccagcagaggagatagaaaccct  
cctccctatgtgccaatctatcccccttaccaaaggacggccccctgagcagccagactcagatggtgacacactccaggctacacctca  
aagggggaaatctgagccccacctcaggaggtcaagaaggaaagtcaggatgatcaagcaggccgcttcgacctggccacacc  
agagtgtggcagatgccccctcgtgaaacacggggacctatctattatgatgaacaggggcaggtcaaggggggcaaccgactttt  
attaccagccttttcaaccactgatctcctaaactggaacaccatactccctactcctcctacacagagaagcccccaagccctca  
gatctgatgcagtcatttttcagacacaaaatccaactggtggccagattgcaaacagctcctcctgacactgttaacaccgaggaatgc  
cgaaggtgaccagggcagccctccactggctggaacacaatgcaccagaaggcacacttaatgtccaggcatatatgctcagggcc  
aattcccagaagccagcctacactgggacccaatgatgcagcccaattacgtacactacagaggactgggaggcactcctgcaag  
ggctaaaggaaggtgggaaaaaggcagtcacacggggaaaatcttggaaagtgtgcagggagactaattaaagtcctggtcagttta  
tgagagactctgtaaagcattctagctttacacccggttgacactgaggctactgagaaccagtgcatggtgaacgcagagtttgtagg  
acagggccaggggagacatcagggcgaagctgcaaaagctagagtgtttcacgggcatgaatgccactcagcttttagaagtgccac  
caaggtgtatgtaaccgtaaccaggagacaagagaggctgatcagacttaagaaaaaggccgatctgtagtggtcagctcctcacag  
gaagggaaactagcatcgcgagtgggtgtggacatagccatggacatggaggggttcaggccaggcagagacctgaaagtcaacc  
aagactatgtaggaatcaatgtgcgcaatgcaaaaagaggggacactggaaagtgatgtccagagggcaatgaagaaaatgaca  
gagactataaaaactggaaaactgccagccaagggtattgtgtccaagggtcagatacctacttgatcaggctggcaggaactgg  
agaatatgaagattaggccagactgggctccttctcttagccc

**Detailed ORFID Gag result:**

Executor: Puteinview  
NumberOfHits: 5  
LeadingInfo::

Leading path in Gag  
Starts at=63856864  
Putein string of length=368 and total score=312.7832

MgGKSSKPIPLECMLRNFKzDYTGdYEIKLTPQRLRTLCEIEWPSFNVGWLAEGTIDRE  
KIGRVfKVVTGvGGQpGHPDQFPYIDSWLNIvQTQPawLQPCLASycKtLiArAKPkVKek  
kSASLSATETKgKPQEKPVLQePAEEiETPPPYVPIyPPLPrTAPeQPDSdGDtLqATPqRG

kSEPPPqEvkkESqDdqaGRLRPGhTRvWQMPIRETRGPiYYDEQGQFkGGQPTFIYQPFST  
TDLLNWKHHTPysSYTEKPQALTDLMQSIFQTQNPTWPDCkQLLLTLFNTEEcRRVTQ  
AALHWLEHNAPEgtLNvQAYmLRQFPEASLHWDPNDAAQLQYLQrYWEALLQGLKE  
GGKKAVENTGKI

yielding average=0.84765095

Inside limits=1.0

Kozak score=0.53125\*1

Comparing score=2.378901

::

TrailingInfo::

Trailing path in Gag

Ends at=63855144

Putein string of length=66 and total score=52.915493

CAqCKKRGHwKgECPEGNEEndrDykTGKIPAKgyCVPRESDTyLirLaGTGeyedzarlGsFSI  
P

yielding average=0.7897835

Inside limits=1.0

For fit length (3-2)\*0.5

For ending at cleavage site=0.44444445\*0.5

Comparing score=2.5120058

::

EstimatedStartPosition: 63856864

EstimatedLastPosition: 63855145

LengthInside: 571

LengthTotal: 593

AlignedAcids: 494

AverageScoreInside: 0.8380022

AverageScoreTotal: 0.80218625

MostUsedRow: 10 (HERV-E\_gag\_AL391419\_alg2\_1fs)

StopCodonsInside: 4(20, 31, 15)

StopCodonsTotal: 4

AmbiguousAcidsInside: 0

AmbiguousAcidsTotal: 0

ShiftsInside: 5

ShiftsTotal: 6

{ Starts at position 63856913, ends at 63855122

Putein::

1 \_\_\_\_\_  
2 \_\_\_\_\_  
3 \_\_\_\_\_  
4 \_\_\_\_\_  
5 \_\_\_\_\_

semkgrvsgfchnweeMgGkSSKPIPLeCMLrNFKzDytGDYeikLTPqRLRTLCEIEWPsFNVGW  
LaEGTIDREkIgrVfKVVTGvGgQpGHPDQFPYIDSWLniVQtQPawLQPCLASycKtLiArA  
KPkVKekSASLSATETKgKpQEKpVLQePAEEiETPPPyvPiyPPLPrTAPeQPDSdGDtLqAT  
PqRGkSEPPPqEvkkESqDdqaGRLRPGhTRvWQMPIRETRGPiYYDEQGQFkGGQPTFIYqP  
FSttDLLNWKHHTPysSYTEKPQALTDLMQSIfQTqNPTWpDCkQLLLTLFNTEEcRRVtQ  
AALhWLEHNAPEgtLNvQaymLRQFPeaSIHWDpNDAAqlqyLQrYwEALLqGLKeGGKKA





{ FirstDNAEnd: 63855284  
{ LastDNAStart: 63856864  
{ MinAverageScore: 20  
{ FrameShiftFactor: -0.9  
{ ScoreFactor: 0.1  
{ Execution time was 2140 milliseconds  
{ Belongs in C:\rt010\Workplace\chr7\chr7\_639  
{ Created Sun May 11 18:13:04 GMT+01:00 2003 under RetroTector version 0.10 03 05 10  
{ using Database:Ordinary last modified Fri Dec 20 13:49:56 GMT+01:00 2002

**Pro defined by ORFID 3060 [63855142]- 3366 [63854836]:**

QEPMTLEVGGQIMnFMVDTGAEHLVVTQPIGPsSKdhTTIvGATGVpEKRPFCQPRRC  
vfGGzEVQHkFLYLPNyPVPLLGRDLLQKLhAQITfGSqGILL

pro DNA:

caggagccatggtcacattagaagtaggaggccagctaataactttatggtagacactggggctgaacacttggtagtgaccagc  
ccatagggccatcatcaaagatcatacaactattgttggggctacaggggtcccagagaagaggccatttgcagccaaggaggtg  
gtcttggaggatgagaggtccaacataaattctgtatctcccaattatccagtgctctactaggaagagacactactccaaaattgc  
atgcacagattaccttgggtcacaaggagatattactt

**Detailed ORFID Pro results:**

Executor: Puteinview  
NumberOfHits: 2  
LeadingInfo::

Leading path in Pro  
Starts at=63855142  
Putein string of length=16 and total score=14.666667  
QEPMTLEVGGQLMNF  
yielding average=0.8627451  
Inside limits=1.0  
Comparing score=1.862745  
::  
TrailingInfo::

Trailing path in Pro  
Ends at=63854835  
Putein string of length=23 and total score=17.838865  
LLGRDLLQKLHQAQITFGSQGILL  
yielding average=0.7432861  
Inside limits=1.0  
For ending at stop codon=1.0\*0.5  
For ending at cleavage site=0.13333334\*0.5  
Comparing score=2.3099527  
::  
EstimatedStartPosition: 63855142  
EstimatedLastPosition: 63854836



{ FrameGene: Pro  
{ PuteinFile: Putein\_S00001CPro\_001.txt  
{ ORFHexamerFactor: 0.2  
{ ChainNumber: 00001  
{ VirusGroup: C  
{ FirstDNAStart: 63855284  
{ FirstDNAEnd: 63854869  
{ LastDNAStart: 63855121  
{ MinAverageScore: 20  
{ FrameShiftFactor: -0.9  
{ ScoreFactor: 0.1  
{ Execution time was 937 milliseconds  
{ Belongs in C:\rt010\Workplace\chr7\chr7\_639  
{ Created Sun May 11 18:13:05 GMT+01:00 2003 under RetroTector version 0.10 03 05 10  
{ using Database:Ordinary last modified Fri Dec 20 13:49:56 GMT+01:00 2002

**Pol defined by ORFID 3449 [63854753]- 6638 [63851564]:**

APMQPCTQEEEkLIFrPIDKiPgVWAEdkppGLAVnQALVVVELKpGATPVqVcQYPISQEdi  
wGIyKHIKwLcDhGIIiqCQSPWNTPLLIVqKplPGpgsDeYiPVQgLhaVNqatVtIHPvVPNIYt  
LmGLiLaSaTWfTVLDLKDFAFFCLyLaPvSQPiFAFzWdnsvtGTGgQLaWTsLPQGFKNSPTi  
FgEALaSDLkAytPpndNcALLQYiDnLLLAAPTqEDCywGTQdLLhLwKaGYRVSkKKAQI  
ChekVKYLGfivsqGeRWLghgzKqAicalPTPTTwRQigEFLGaAGFChiWIPnFSLiArPLYeaT  
REGekePllzkaDQkKvFkQIKeALTqAPALGLPDtTKPFLYVhEIKGmAiGVLTQiiGsWhRP  
VvYLSKqLTVvLWPPCCkAlAttLLTqeADKLTlGQqLTIqvPHAVitLmdQreqhWLSNptM  
TzYQgLLcenpRitleTVnTLNPATLLPVkPGiTfRDCgnvdEvfsRgDLTDQPfkDpDveyfiDGS  
SFvlEGvcwAGzAvVTIdSVVeAzpqaGAGTSAQKAELaALTrvLqLAEdKKIsVYTDSkYAFa  
TIHVHGAIYKeRGLLTatGKEIKwKEzILqLLdAvwiPekVAamHCrGHQRaGtSEAKGNRkA  
DrEAkwAamvtpfhkKEAlAmplLpEppLQevSSySPnEkaVLPKKIEnILkEdGgnfDgRsaiPKmVa  
PKFvKzLHHeLvGktaLeTLLgRhFYvPrLtAitQaVcEQyltCAQnNpzqwptRpPGiqeiGtmPcenll  
mDTElPqagsYrYmLVIVyTFSGWakAFPTrsKnszeVTKiLLrnIiPRFGlsVtLGSdNrIAFlAeii  
QeLTrvLkIkWKLHtAYRIQSIGkVEcMNwTLKqLLkkyqcETplRWdqVLPmVLLqVRcTPtk  
qtGysPYEILfGkPsPiisqIkgnLrElGELTIrRqMQALgiAmzsVHgWvQKnAhKPDRPIHPFKPr  
DSIWVkkznPttLgPiWdGIHTViLsiPTvVKVaGIvpWIHpsSqLKPAaQDkwTSqqDLdhaTQLI  
LRGT

pol DNA:

gcaccaatgcagccttgtagcaggaggaagagaaattatttagccaattgataaaattcctggagtagggctgaagacaagcc  
acctgggctggctgtaaatcaggcactgtagtagaattaaaaccaggagcaactccagttcaggtttgtagtaccactttccaaga  
ggatattggggcatttataagcatttaaagtggctctgtagcattgggatcataatccaatgccagtcaccctggaactccactttgct  
ggtacaaaaaccattgcctggaccaggatctgatgagtatataccggcagggcttgcagctgtgtaaaccaagccacggtgaccata  
catccagtagtaccaaacctgtatactttaatgggacttattctagcaagtgccacctggttacagtcctggactaaaggatgctttctct  
gtctctacctggcaccagttagtcagccatcttgcatttfaatgggacaattcagtcacaggcacagggggacagctcgcctggacta  
gtctcccacaagggttcaagaattctcccacaatcttggggaagcactggcctcagacctcaaggcatacaccaccaaatagacaac  
tgcgcttggtagcagtagacacacttcttggcagcccaaccaagaggactgttactggggaaccaggacctcctcatctc  
ttatggaaagcagggtatagatataaaaagaaggcccaattgcatgaaaagggttaaatatttaggctcatagtaagccaaggg  
gaacgctggcttggcatggatgaaagcaagccatttggcacttccaactccaaccacctggcgcacaataggggaattcttagggg  
cagcaggggtctgcatatctggatcccaatttctcacttatagccaggcccttatatgaagccacaagggagggtgaaaaggaaccc

ctcctctgaaaggctgaccagaagaagggtttaacaacaatcaagaagccctaactcaggetccagccttaggactgccagatactac  
taagcctttctttatgatgcatgaattaaaggggaatgctataggggtcctgactcaaatcataggatcatggcatgccccagtggtg  
acttatccaacagttgactctgtggtgctaggggtggcctccttgctgtaagcactagccactaccacctattgacacaagaagctga  
caactgacctggggcaacaattgaccatccaggtaccacatgcggtataactttaatggatcagagagcagcattggttatcaaa  
cccaacgatgacttgataccaagggctcctatgtgaaaatccacgcataactttaaaacagtgaaacaccttaaccagctacctgt  
cccagtcaaaccgggaatcacctccgtgactgtggcaacagtgagcaggtatttccagtcgaggagaccttacagaccagccttc  
aaggaccagatgtagaatactcatagatggaagcagtttgtgctggaaggggtctgctgggctgggtaggcagtggtgacctaga  
ctcagtggtggaggcgtagcctcagcctgctggaacatcagcccagaaggcagagctagcagccctaacgaggggttctccagctgg  
cagaagcaaaaagatcagtgtttacacggattccaatatgctttgccacactgcatgttcatggagctatatataagaagaggact  
cttaactgccacaggcaaaagaaataaaatggaaagaatgaattctacagctcttagatgctgtatggatccagagaaagtagcagctat  
gactgcaggggacaccagagggcagggacgtcagaggcaaaaggaacagaaaggcagacagggaggcaaaatgggcagca  
atggttacacctatttaaaaaggaagccttagctatgcccctcctccagagcctccccccaggaggtctcaagtactctccgaatg  
agaaggcctgtttgcccataaaactggaaaatatattgaaggaggatggtggaaattttctgatgggaggtcgccattcccaaatgg  
tgcccccaattgtgaagtaattgcatcatggaactcgtgggaaaaacagcactagaaacgctactagagccatttctatgtccg  
cgactcactgccataccaagctgtttgtaacaatatttaacctgtgccagaacaacctatgacaatggcccactcggccccagg  
aattcaggaataggaacctgacctgtgaaaacctgcttaggacttacagagttgcctcaggcagggagctatcggtacatgtagta  
ctgtctacacctttcaggatgggccaaggctttccctaccagaagcaagaactcatgagaagtactaaaataactattaagaacattat  
ccccagattggactgtctgactctagggcagacaacaggctggcatttctagctgaaataattcaggaactaacacgagtgtaaaa  
ataaaatgaaattacacacagcctaccggctgcagagcttaggaaaagtagagtgcatgaactggacactcaaacagctactgaaga  
aatattgcaagaaacacctctgagatgggatcaagtctgcccattgctcctcaagttaggtgcacccccaccaacaactggg  
tattgcctatgaaatactgttcggcaagccatccccatcataagtcaaattaagggtaatctcctgtaactaggggaattaactttaag  
gaggcaaatgcaggtttaggatagccatgtgaagtgtccatggctgggtacaggaagaatgccataagcctgatagatccaata  
caccccttaaacccagggactctttgggtcaaaaaataaaaccaacctctgggacccatagggatgggctccatactgtaate  
ttgtctattcccactgttgttaagttgcaggaattgtccttggatccatccatccagtcagctgaaaccagcagcccaggacaagtgga  
ccagccaacaggacctagacctgaacccagctgacctacgatggaacc

**Detailed ORFID Pol result:**

Executor: Puteinview

NumberOfHits: 8

LeadingInfo::

Leading path in Pol

Starts at=63854753

Putein string of length=84 and total score=64.92558

APMQPCTQEEELIFRPIDKIPGVWAEdKPPGLAVNQALVVELKPGATPVQVcQYPLS

QEdIWGIyKHLKWLcDHGIIIQCQSP

yielding average=0.76383036

Inside limits=1.0

Comparing score=1.7638304

::

TrailingInfo::

Trailing path in Pol

Ends at=63851563

Putein string of length=58 and total score=39.640514

GPIWDGLHTVILSIPTVVKVAGIWPWIHpSSQLKPAAQDkwTSQQDLHaTQLILRGT

yielding average=0.67187315

Inside limits=1.0

For fit length (3-2)\*0.5





{ ORFHexamerFactor: 0.2  
{ ChainNumber: 00001  
{ VirusGroup: C  
{ FirstDNAStart: 63854869  
{ FirstDNAEnd: 63851677  
{ LastDNAStart: 63854602  
{ MinAverageScore: 20  
{ FrameShiftFactor: -0.9  
{ ScoreFactor: 0.1  
{ Execution time was 2453 milliseconds  
{ Belongs in C:\rt010\Workplace\chr7\chr7\_639  
{ Created Sun May 11 18:13:07 GMT+01:00 2003 under RetroTector version 0.10 03 05 10  
{ using Database:Ordinary last modified Fri Dec 20 13:49:56 GMT+01:00 2002

**Env defined by ORFID 6910 [63851292]- 8721 [63849481]:**

MLGMNMLLITLFLLLPLSMLKGEPWEGCLHCTHTTWSGNIMTKTLLYHTYYECAGT  
CLGTCTHNQTTYSVCDPGRGQPYVCYDPKSSPGTWFEIHVGSKEGDLLNQTQVFPSPG  
KDVVSLYFDVCQIVSMGSLFPVIFSSMEY YSSCHKNRYAHPACSTDSPVTTTCWDCTT  
WSTNQQLGPIMLTKIPLEPDCKTSTCNSVNL TILEPDQPIWTTGLKaPLGARVSGEEIG  
PGAYVYL YIIKKTRTRSTQQfRVFESFYEHVNQKLPEPPPLASNLFAQLAENIASSLHV  
ASCYVCGGMNMGDQWPWEARELMPQDNFTLTASSLEPAPSSQSIWFLKTSIIGKFCI  
ARWGKAFTDPVGELTCLGQQYYNETLGKTLWRGKSNNSESPHPSPF SRFPSLNHSWY  
QLEAPNTWQAPSGLYWICGPQAYRQLPAKWSGACVLGTIRPSFFLMPLKQGEALGYP  
IYDETKRKS KRGITIGDWKDNEWPPERIIQYYGPATWAEDGMWGYRTPVYMLNRIIR  
LQAVLEIITNETAGALNLLAQQATKMRNVIIYQNRLALDYLLAQEEGVCGKFNLNCC  
LELDDEGKVIKEITAKIQKLAHIPVQTWKG

env DNA:

atgctgggtatgaacatgctactcatcactttgttcttctactccccttatccatgttaaaggagaacctgggaggatgcctccactg  
caccacactacgtggtcggggaacatcatgactaaaacctgtgtatcacacttattatgagtgtgctgggacctgcctaggaactgt  
actcacaaccagacaacctactcagtctgtgaccagggaagggccagccttatgtgtgtatgaccttaagtcttacctgggacctg  
gtttgaaattcatgctgggtcaaaggaaggggatctttaaaccaaaccaaggtattccctctggcaaggatgctgtatccttatacttg  
atgtttgccagatagtatccatgggctcactcttcccgaatcttcagttccatggagtactatagtagctgcataaaaataggtatgcac  
acctgctgttccaccgattcccagtaacaactgtgggactgcacaacgtggtccactaaccaacaatcactagggccaattatgc  
ttacaaaataaccattagaaccagattgtaaaacaagcacttgaattctgtaaatcttaccatcttagaccagatcagccatattggaca  
acaggtttaaaagcaccgctaggggcacgagtcagcggggaagaaattggcccaggagcctatgtctatctatatacataaagaaaac  
tcggaccgcgtaaccaacagttccgagttttgagtcattctatgagcatgttaaccagaaattgcctgagccccctccctggccagt  
aatttattcggccaactggctgaaaacatagccagcagcctgcacgttctcatgttatgtctgtgggggaatgaacatgggagaccaa  
tgccatgggaagcaagggaaactaatgccccagataattcacactaaccgctcttccctgaacctgcaccatcaagtcagagcat  
ctggttcttaaaaacctcattattggaaaattctgtattgctcgtggtgggaaagcccttacagaccagtaggagatgtaactgcctag  
gacaacaatattacaacgagacactaggaagactttatggaggggcaaaagcaataattctgaatcaccacccaagcccattctct  
cgtttccatctttaaaccattctgtaccaacttgaagetccaaataacctggcaggcaccctctggcctctactggatctgtggccaca  
agcatatgcacaactgccagctaaatggtcaggggctgtgtactggggacaattaggccctcttcttctaatgccctaaaacagg  
gagaagccttaggatacccatctatgatgaaactaaaaggaaaagcaaaagaggcataactataggagattggaaggacaatgaat  
ggcctcctgaaagaataattcaatattatggcccagccactgggcagaaagatggaatgtggggataccgcacccagtttcatgctt  
aaccgcattataagattgcaggcagtagaatacattaccaatgaaactgcagggccttgaatctgcttggccagcaagccacaaa  
aatgagaatgtcattatcaaaatagactggccttagactacctctagcccaggaagaggagatgcggaaagttcaacctactaa

ctgctgcctggaacttgatgacgaaggaaaggtcatcaaaagaataactgctaaaatccaaaagtagctcacatcccagttcagacttg  
gaaagga

**Detailed ORFID Env result:**

Executor: Puteinview  
NumberOfHits: 3  
LeadingInfo::

Leading path in Env

Starts at=63851292

Putein string of length=469 and total score=468.1137

MLGMNMLLITLFLLLPLSMLKGEPWEGCLHCTHTTWSGNIMTKTLLYHTYYECAGT  
CLGTCTHNQTTYSVCDPGRGQPYVCYDPKSSPGTWFEIHVGSKEGDLLNQTkvFPSG  
KDVVSLYFDVCQIVSMGSLFPVIFSSMEYYSSCHKNRYAHPACSTDSPVTTTCWDCTT  
WSTNQQLGPIMLTKIPLEPDKTSTCNSVNL TILEPDQPIWTTGLKaPLGARVSGEEIG  
PGAYVYLYIIKKTRTRSTQQFRVFESFYEHVNQKLPEPPPLASNLFAQLAENIASSLHV  
ASCYVCGGMNMGDQWPWEARELMPQDNFTLTASSLEPAPSSQSIWFLKTSIIGKFCI  
ARWGKAFTDPVGELTCLGQQYYNETLGKTLWRGKSNNSESPHPSPFSRFP SLNHSWY  
QLEAPNTWQAPSGLYWICGPQAYRQLPAKWSGACVLGTIRPSFFLMPLKQGEALGYP  
IYDETKRKS

yielding average=0.99598664

Inside limits=1.0

For fit length (89-2)\*0.5

Kozak score=0.53125\*1

For SpliceAcceptorMotif hit at 63851311 0.85714287\*1.5

von Heijne score with WEGCLHCTHTTWSGN =0.025809368\*0.5

Comparing score=47.325855

::

TrailingInfo::

Trailing path in Env

Ends at=63849480

Putein string of length=57 and total score=57.0

YQNRLALDYLLAQEEGVCCKFNLTNCCLELDDEGKVIKEITAKIQKLAHIPVQTWKG

yielding average=0.98275864

Not inside limits=0

For fit length (35-2)\*0.5

For ending at stop codon=1.0\*0.5

Comparing score=17.98276

::

EstimatedStartPosition: 63851292

EstimatedLastPosition: 63849481

LengthInside: 604

LengthTotal: 1026

AlignedAcids: 602

AverageScoreInside: 0.996877

AverageScoreTotal: 0.5567527

MostUsedRow: 3 (ERV3SU+TM)

StopCodonsInside: 0(0, 39, 38)





|          |          |          |          |
|----------|----------|----------|----------|
| 63850233 | 63850143 | 63850053 | 63849963 |
| 63849873 | 63849783 | 63849693 | 63849603 |
| 63849513 | 63849423 | 63849333 | 63849243 |
| 63849153 | 63849059 | 63848969 | 63848877 |
| 63848787 | 63848696 | 63848606 |          |

::

Hits::

- 1 63849885 82 SU3 P C #KRgiviGnWkdnew HERV-E
- 2 63849651 100 TM3 P C #yQNRLALDYLLA HERV E/ERV3
- 3 63849414 37 TM5 HYF ABCDELSGO #X\_\_\_\_\_ hydrophobic motif

::

```
{ Created by ORFID with parameters
{ NonAlignedScore: 0.4
{ GlycosylationFactor: 0.2
{ StopCodonFactor: -0.4
{ LastDNAEnd: 63848586
{ NonORFHexamerFactor: -0.1
{ MotifHitFactor: 0.01
{ DNAFile: chr7_639.txt
{ StopCodonValue: -20
{ ScriptName: C:\rt010\Workplace\chr7\chr7_639\orfid_s00001cenv001Script_.txt
{ OutputFile: ORFIDout_S00001CEnv_001.txt
{ InputFile:
{ MinHitScore: 15
{ Debugging: No
{ Database: Ordinary
{ Strand: Secondary
{ FrameGene: Env
{ PuteinFile: Putein_S00001CEnv_001.txt
{ ORFHexamerFactor: 0.2
{ ChainNumber: 00001
{ VirusGroup: C
{ FirstDNAStart: 63851677
{ FirstDNAEnd: 63849351
{ LastDNAStart: 63850501
{ MinAverageScore: 20
{ FrameShiftFactor: -0.9
{ ScoreFactor: 0.1
{ Execution time was 3657 milliseconds
{ Belongs in C:\rt010\Workplace\chr7\chr7_639
{ Created Sun May 11 18:13:11 GMT+01:00 2003 under RetroTector version 0.10 03 05 10
{ using Database:Ordinary last modified Fri Dec 20 13:49:56 GMT+01:00 2002
```

**ERV3 XORF predicted by XONID at 6637 [63851565] - 6909 [63851293]:**

The only suitably positioned methionine for a putative XORF protein is at 6623 [63851579] in frame 1. It requires a shift to frame 3 approximately at 6738 [63851464]. Alternatively, the

putative XORF protein could have an internal ribosomal entry start (IRES) after this frameshift. Using the mentioned methionine, the reconstructed putative ERV3 XORF protein (134 aa) becomes

MEPRCQZDDNSPALVTPEADQSTHGZSLRRQPCSSPQKLTSLCTAEAZVIIREVNVV  
RNLKSSNFPCHINYFAIKLSLCLAFSPQEKAFSVHAGYEHATHHFVLATPLIHVKRRTL  
GGMPPLHPHYVVGEHHD.

The underlined portion is from frame 1. The rest is from frame 3. It contains three stops (shown as “Z”). Therefore, unless there is an internal ribosomal entry sequence (IRES) past the last stop codon, the putative XORF protein should not be active in ERV3 7q11. Its C-terminal 20 amino acids have a moderate similarity to a histidine-rich domain positioned close to the carboxy terminus of the latrophilin G-protein-coupled seven-transmembrane brain-specific toxin receptors (see supplementary data). The XORF sequence is present in several ESTs >98% identical to ERV3 7q11 (Fig 1). An XORF reminiscent of the one in ERV3 7q11 was seen in 10 (chr 6, Y, Y, Y, Y, 11, 19, 7, 14 and 14) of the 41 ERV3like sequences defined here. The consensus XORF for them became

GACAACAGCCCTGCTCTGGTCACTCCAGAAGCTGACCAGTCTACGCATCGCTGAA  
GCTTGAGGAGACAACAAGCCATGCTCTAGTCACCCAGAAAGCTTACTAGTCTACG  
CACGGCCGAAGCTTGAGGAAGTCAACATCAGATAAGTAAATGTGGATAGAAATC  
TTAAGTCAAGTAATTTTCTTTGTAATATTAATTGTTTTACTATTGTTCTGTCATTTT  
CCTCAATCTCCTCCACCGGGTAAAAACCTCTTTTGTCTTGGATATAAACATG  
CTACTCTTTACTTTGTTCTTACTACTCCCCATA This is translatable to  
QQPCSGHSRSZPVYASLKLEETTSALVTPEAYZSTHGRSLRKSTSDKZMWIEILSQVI  
FFVILIVLLLFCHFPQSPPPGKNLFCPCWIZTCYSLLCSSYYSP or  
TTALLWSLQKLTSLRIAEAZGDNKPCSSHPRSLLVYARPKLEEVNIRZVNVDRLKSS  
NFLCNINCFTIVLSFSSISSTGZKPLLSLLDINMLLFTLFLLLPI.

The latter contains a similarity to the C terminus of the Pol protein suggested by Cohen, O’Connel and Kato (Virology 1987) AA88026 (M12140.1):

l gypsyerlfg kpspiisqik gnlrelgelt lrrmqalgi amxsvhgwvq ermpislidp 61 ihpfkprdsl  
wvkkxnpttl gpiwdglhtv ilsiptvkv agivpwihps sqlkpaaqdk 121 wtsqqldha tqllirwnqg  
asemtallw slrkltsprt aea, where the overlapping similarity is underlined.

A search for similar nucleic acids and proteins, other than human and chimpanzee genomic ones, in GenBank, did not reveal related nonretroviral sequences. Thus, the review of the ten ERV3 7q11 related XORFs did neither reveal a consensus with all open reading frame, nor a protein of obvious function.

JB 040510

### Identification of the loci of 41 ERV3-like sequences

RetroTector-defined chains were located in the hg15 (April 2003) human genome using Genome Browser at the UCSC web site. EST data were as shown there. It is not a complete EST or cDNA list.

List of 23 tree defined ERV3:

|                            |                        |                                      |                |
|----------------------------|------------------------|--------------------------------------|----------------|
| Chr7 63858202 1754 po CR   | 7q11.21                | EST: M55422, AK074464,               | In Env tree&DM |
| Chr6 110218096 843 po CX   | Tandem HERV3 on 6q21.  | No ESTs                              |                |
| Chr6 110214535 786 po CX   |                        | No ESTs                              |                |
| ChrY 3018841 881 po CR     | Yp11.2 LTR76+LTR76int  | No ESTs                              |                |
| ChrX 86876098 639 po CX    | Xq21.31 LTR76+LTR76int | No ESTs (similar to previous!)       |                |
| Chr14 68899917 965 po CX   | 14q24.2 LTR4+HERV3     | No ESTs                              | In Env tree&DM |
| ChrY 23874437 661 po CX    | Yq11.223 HERV3         | No ESTs                              |                |
| ChrY 27518418 649 po CX    | Yq11.23 HERV3          | No ESTs                              |                |
| ChrY 25016892 657 po CX    | Yq11.223 HERV3         | No ESTs                              |                |
| ChrY 19932937 520 po CX    | Yq11.222 LTR4+HERV3    | No ESTs (contains MER11A)            | In Env tree&DM |
| ChrY 20104614 518 po CX    | Yq11.222 LTR4+HERV3    | No ESTs                              | In Env tree&DM |
| Chr19 58660155 598 po CX   | 19q13.42 HERV3         | No ESTs                              | In Env tree&DM |
| Chr19 58621153 500 po CX   | 19q13.42 HERV3         | No ESTs (two tandem HERV3)           | In Env tree&DM |
| Chr7 139686987 710 po CX   | 7q34 HERV3             | No ESTs                              |                |
| Chr7 137651301 1097 po CP  | 7q34 HERV3             | No ESTs                              |                |
| Chr11 29579197 930 po CP   | 11p14.1 HERV3          | No ESTs                              | In Env tree&DM |
| Chr4 117329205 488 po CX   | 4q26 HERV3+LTR76       | No ESTs                              |                |
| Chr21 38522185 383 po CX   | 21q22 HERV3+LTR76      | CA432258 enchondroma +AceView Febaw? |                |
| Chr4 70173370 1049 po CX   | 4q13.2 Harlequin+LTR2B |                                      |                |
| Chr4 70022513 788 po CX    | 4q13.2 HERV3+LTR76     | BX095654 fetal liver<br>skawkaw      |                |
| Chr14 105225894 1027 po CX | 14q32.33 HERV3+LTR76   | No ESTs                              | In Env tree&DM |
| Chr7 119241536 761 po CX   | 7q31.31 HERV3+LTR4     | No ESTs                              | In Env tree&DM |
| ChrY 22564970 567 po CX    | Yq11.223 HERV3+LTR15   | AK097136 normal spleen rohiru        |                |

List of 18 tree defined RRHERVI-HERV15:

|                           |                                    |                                                                  |                |
|---------------------------|------------------------------------|------------------------------------------------------------------|----------------|
| Chr6 64985396 1041 po CX  | 6q12 HERV3+LTR30                   | No ESTs                                                          | In Env tree&DM |
| ChrY 20355209 659 po CX   | Yq11.222                           | BC022384 skel muscle<br>BI020800 adult marrow<br>Aceview sleydaw | In Env tree&DM |
| Chr3 34567166 523 po CX   | 3p23 HERV3+LTR30                   | No ESTs                                                          |                |
| Chr3 122072468 245 po CX  | 3q13.33 HERV3+LTR30                | No ESTs                                                          |                |
| Chr11 58788475 541 po CX  | 11q12.1 HERV3+LTR30                | No ESTs                                                          | In Env tree&DM |
| Chr6 137421042 373 po CX  | 6q23.3 HERV3,HERV15+LTR30          | No ESTs                                                          | In Env tree&DM |
| Chr4 115910608 550 po CP  | 4q26 HERV15+LTR30                  | No ESTs                                                          | In Env tree&DM |
| Chr21 14409346 1477 po CP | 21q11.2 HERV15+LTR15               | No ESTs                                                          | In Env tree&DM |
| ChrX 51259700 1396 po CP  | Xp11.22 HERV15+LTR15 cont MER11C   | No ESTs                                                          | In Env tree&DM |
| ChrY 13743185 977 po CI   | Yq11.21 HERV15+LTR15               | No ESTs                                                          |                |
| ChrX 117198092 983 po CX  | Xq24 HERV15 + LTR15                | No ESTs                                                          | In Env tree&DM |
| Chr19 21166030 1412 po CX | 19p13.11 HERV15 + LTR15            | No ESTs                                                          | In Env tree&DM |
| Chr19 21213743 913 po CX  | 19p13.11 HERV15 + LTR15            | No ESTs                                                          |                |
| Chr19 15957774 569 po CX  | 19p13.12 HERV15 Contains LTR5/61   | No ESTs                                                          |                |
| Chr11 77508681 297 po CX  | 11q13.5 HERV3+LTR61                | AK093267 spliced env testis<br>AK096213 spliced env adult ovary  |                |
| Chr13 98250769 738 po CX  | 13q32.3 HERV3+LTR61 Cont:s LTR5(B) | No ESTs                                                          |                |
| Chr6 39968183 513 po CP   | 6p21.2 HERV3+LTR15                 | No ESTs                                                          |                |
| Chr15 66867263 645 po CX  | 15q23 HERV3+LTR76                  | No ESTs                                                          |                |

(Total of 41 ERV3 like)

The RRHERVI element at ChrY 14533115 (AF290423, "HERV15Yq2") was not identified in hg15. It may thus be polymorphic.

CLUSTAL W (1.81) multiple sequence alignment

```
HERVI_polputein -----
HERVI10F_polputein -----
HERVadp_AC005741 -----
HERV-PT47D -----
HERV_W_chr6_141432567_ERV9_lik -----
ERV9_PH1_RT -----
Chr13_54564403_572_po_C_Yz7/14 -----
HERV_Y_chr12_51022911_pol -----
HERV17_polputein -----
HERV_W_chr7_9105739_syncytin_p -----
HERV9_polputein -----
HUERS-P3_polputein -----
ERVfrd_AC004022 -----
PRIMA41_polputein -----
HERV_H_RGH1_pol -----
HERVHRGH2_pol -----
HERV_H48I_polputein -----
HERV_H_RTVLH2_pol -----
HERVVFH21_pol -----
HERVRblike_chr4_109047953 -----
ChrY_13790029_693_po_C_Xz12/11 -----
HERVS71_polputein -----
BaEV_M7_pol -----
HERVR_polputein -----
AKR_MLV_MLOCG_RT -----
GaLV_pol -----
Chr3_158587414_1662_po_C_Ez10/ -----
Chr3_79627623_1138_po_C_Ez4/7 -----
Chr19_20477244_1350_po_C_Ez10/ -----
Chr5_111890459_1626_po_C_Ez10/ -----
ChrX_48766518_1600_po_C_Ez6/3 -----
ChrX_152580713_1572_po_C_Ez10/ -----
ChrX_139287533_1154_po_C_Xz8/4 -----
Chr2_52615786_912_po_C_Xz11/5 -----
HERV-E_4_1 -----
ChrY_21962399_1137_po_C_Xz13/9 -----
ChrY_8634032_950_po_C_Xz14/10 -----
Chr3_126735360_997_po_C_Xz5/10 -----
Chr3_126713203_958_po_C_Xz7/8 -----
Chr3_75226118_977_po_C_Xz8/9 -----
Chr7_6629919_827_po_C_Xz8/7 -----
Chr4_9166812_811_po_C_Xz8/10 -----
Chr12_8478642_834_po_C_Xz12/7 -----
Chr10_15187175_787_po_C_Xz11/5 -----
Chr11_71819740_854_po_C_Xz11/9 -----
Chr11_71519974_886_po_C_Xz13/9 -----
Chr8_7271441_969_po_C_Xz10/6 -----
Chr8_11770066_826_po_C_Xz9/8 -----
Chr4_4128362_651_po_C_Xz7/11 -----
Chr14_50203955_850_po_C_Xz10/8 -----
Chr14_50205291_837_po_C_Xz10/8 -----
Chr7_6597120_842_po_C_Xz7/7 -----
Chr11_71544658_783_po_C_Xz8/13 -----
Chr11_67999520_760_po_C_Xz8/8 -----
Chr3_75461975_796_po_C_Xz7/9 -----
Chr12_52228939_692_po_C_Xz3/10 -----
Chr10_15211234_286_po_C_Xz11/1 -----
Chr12_100973302_945_po_C_Xz12/ -----
Chr19_9685420_817_po_C_Xz6/10 -----
Chr13_40936820_719_po_C_Xz9/10 -----
Chr7_63858202_1754_po_C_Rz12/9 -----
ERV3_chr7q21_AC073210_polputei -----
Chr6_110218096_843_po_C_Xz16/8 -----
Chr6_110214535_786_po_C_Xz16/8 -----
ChrY_3018841_881_po_C_Rz9/12 -----
ChrX_86876098_639_po_C_Xz7/8 -----
Chr14_68899917_965_po_C_Xz6/8 -----
ChrY_23874437_661_po_C_Xz15/9 -----
ChrY_27518418_649_po_C_Xz15/9 -----
ChrY_25016892_657_po_C_Xz13/12 -----
ChrY_19932937_520_po_C_Xz10/14 -----
ChrY_20104614_518_po_C_Xz10/14 -----
Chr19_58660155_598_po_C_Xz21/1 -----
Chr19_58621153_500_po_C_Xz21/1 -----
```

Chr7\_139686987\_710\_po\_C\_Xz11/7 -----  
 Chr7\_137651301\_1097\_po\_C\_Pz13/ -----  
 Chr11\_29579197\_930\_po\_C\_Pz8/12 -----  
 Chr4\_117329205\_488\_po\_C\_Xz3/16 -----  
 Chr21\_38522185\_383\_po\_C\_Xz7/9 -----  
 Chr4\_70173370\_1049\_po\_C\_Xz11/8 -----  
 Chr4\_70022513\_788\_po\_C\_Kz10/12 -----  
 Chr14\_105225894\_1027\_po\_C\_Xz13 -----  
 Chr7\_119241536\_761\_po\_C\_Xz11/1 -----  
 ChrY\_22564970\_567\_po\_C\_Xz9/10 -----  
 Chr21\_14409346\_1477\_po\_C\_Pz5/6 -----  
 ChrX\_51259700\_1396\_po\_C\_Pz7/8 -----  
 Chr6\_64985396\_1041\_po\_C\_Xz11/1 -----  
 ChrY\_20355209\_659\_po\_C\_Xz7/11 -----  
 Chr3\_34567166\_523\_po\_C\_Xz8/6 -----  
 Chr3\_122072468\_245\_po\_C\_Xz9/9 -----  
 Chr11\_58788475\_541\_po\_C\_Xz8/22 ANVTGIGITLLAKQCLNLSQQDPVWWMQSESESKACHEGGNGRKS IKAYST  
 Chr6\_137421042\_373\_po\_C\_Xz6/9 -----  
 Chr4\_115910608\_550\_po\_C\_Pz8/12 -----  
 ChrY\_13743185\_977\_po\_C\_Xz14/8 -----  
 HERV15 -----  
 ChrX\_117198092\_983\_po\_C\_Xz8/8 -----  
 Chr19\_21166030\_1412\_po\_C\_Xz9/1 -----  
 Chr19\_21213743\_913\_po\_C\_Xz14/1 -----  
 Chr19\_15957774\_569\_po\_C\_Xz8/10 -----  
 Chr11\_77508681\_297\_po\_C\_Xz19/1 -----  
 Chr13\_98250769\_738\_po\_C\_Xz7/13 -----  
 Chr6\_39968183\_513\_po\_C\_Pz10/9 -----  
 Chr15\_66867263\_645\_po\_C\_Xz11/1 -----  
 HERV18\_polputein -----  
 HERVIP10FH\_polputein -----  
 MER66\_polputein -----

HERVI\_polputein -----  
 HERVIP10F\_polputein -----  
 HERVadp\_AC005741 -----  
 HERV-PT47D -----  
 HERV\_W\_chr6\_141432567\_ERV9\_lik -----  
 ERV9\_PHL\_RT -----  
 Chr13\_54564403\_572\_po\_C\_Yz7/14 -----  
 HERV\_Y\_chr12\_51022911\_pol -----  
 HERV17\_polputein -----  
 HERV\_W\_chr7\_9105739\_syncytin\_p -----  
 HERV9\_polputein -----  
 HUERS-P3\_polputein -----  
 ERVfrd\_AC004022 -----  
 PRIMA41\_polputein -----  
 HERV\_H\_RGH1\_pol -----  
 HERVHRGH2\_pol -----  
 HERV\_H48I\_polputein -----  
 HERV\_H\_RTVLH2\_pol -----  
 HERVVFH21\_pol -----  
 HERVRblike\_chr4\_109047953 -----  
 ChrY\_13790029\_693\_po\_C\_Xz12/11 -----  
 HERVS71\_polputein -----  
 BaEV\_M7\_pol -----  
 HERVR\_polputein -----  
 AKR\_MLV\_MLOGC\_RT -----  
 GaLV\_pol -----  
 Chr3\_158587414\_1662\_po\_C\_Ez10/ -----  
 Chr3\_79627623\_1138\_po\_C\_Ez4/7 -----  
 Chr19\_20477244\_1350\_po\_C\_Ez10/ -----  
 Chr5\_111890459\_1626\_po\_C\_Ez10/ -----  
 ChrX\_48766518\_1600\_po\_C\_Ez6/3 -----  
 ChrX\_152580713\_1572\_po\_C\_Ez10/ -----  
 ChrX\_139287533\_1154\_po\_C\_Xz8/4 -----  
 Chr2\_52615786\_912\_po\_C\_Xz11/5 -----  
 HERV-E\_4\_1 -----  
 ChrY\_21962399\_1137\_po\_C\_Xz13/9 -----  
 ChrY\_8634032\_950\_po\_C\_Xz14/10 -----  
 Chr3\_126735360\_997\_po\_C\_Xz5/10 -----  
 Chr3\_126713203\_958\_po\_C\_Xz7/8 -----  
 Chr3\_75226118\_977\_po\_C\_Xz8/9 -----  
 Chr7\_6629919\_827\_po\_C\_Xz8/7 -----  
 Chr4\_9166812\_811\_po\_C\_Xz8/10 -----  
 Chr12\_8478642\_834\_po\_C\_Xz12/7 -----

Chr10\_15187175\_787\_po\_C\_Xz11/5  
Chr11\_71819740\_854\_po\_C\_Xz11/9  
Chr11\_71519974\_886\_po\_C\_Xz13/9  
Chr8\_7271441\_969\_po\_C\_Xz10/6  
Chr8\_11770066\_826\_po\_C\_Xz9/8  
Chr4\_4128362\_651\_po\_C\_Xz7/11  
Chr14\_50203955\_850\_po\_C\_Xz10/8  
Chr14\_50205291\_837\_po\_C\_Xz10/8  
Chr7\_6597120\_842\_po\_C\_Xz7/7  
Chr11\_71544658\_783\_po\_C\_Xz8/13  
Chr11\_67999520\_760\_po\_C\_Xz8/8  
Chr3\_75461975\_796\_po\_C\_Xz7/9  
Chr12\_52228939\_692\_po\_C\_Xz3/10  
Chr10\_15211234\_286\_po\_C\_Xz11/1  
Chr12\_100973302\_945\_po\_C\_Xz12/1  
Chr19\_9685420\_817\_po\_C\_Xz6/10  
Chr13\_40936820\_719\_po\_C\_Xz9/10  
Chr7\_63858202\_1754\_po\_C\_Rz12/9  
ERV3\_chr7q21\_AC073210\_polputei  
Chr6\_110218096\_843\_po\_C\_Xz16/8  
Chr6\_110214535\_786\_po\_C\_Xz16/8  
ChrY\_3018841\_881\_po\_C\_Rz9/12  
ChrX\_86876098\_639\_po\_C\_Xz7/8  
Chr14\_68899917\_965\_po\_C\_Xz6/8  
ChrY\_23874437\_661\_po\_C\_Xz15/9  
ChrY\_27518418\_649\_po\_C\_Xz15/9  
ChrY\_25016892\_657\_po\_C\_Xz13/12  
ChrY\_19932937\_520\_po\_C\_Xz10/14  
ChrY\_20104614\_518\_po\_C\_Xz10/14  
Chr19\_58660155\_598\_po\_C\_Xz21/1  
Chr19\_58621153\_500\_po\_C\_Xz21/1  
Chr7\_139686987\_710\_po\_C\_Xz11/7  
Chr7\_137651301\_1097\_po\_C\_Pz13/1  
Chr11\_29579197\_930\_po\_C\_Pz8/12  
Chr4\_117329205\_488\_po\_C\_Xz3/16  
Chr21\_38522185\_383\_po\_C\_Xz7/9  
Chr4\_70173370\_1049\_po\_C\_Xz11/8  
Chr4\_70022513\_788\_po\_C\_Kz10/12  
Chr14\_105225894\_1027\_po\_C\_Xz13  
Chr7\_119241536\_761\_po\_C\_Xz11/1  
ChrY\_22564970\_567\_po\_C\_Xz9/10  
Chr21\_14409346\_1477\_po\_C\_Pz5/6  
ChrX\_51259700\_1396\_po\_C\_Pz7/8  
Chr6\_64985396\_1041\_po\_C\_Xz11/1  
ChrY\_20355209\_659\_po\_C\_Xz7/11  
Chr3\_34567166\_523\_po\_C\_Xz8/6  
Chr3\_122072468\_245\_po\_C\_Xz9/9  
Chr11\_58788475\_541\_po\_C\_Xz8/22  
Chr6\_137421042\_373\_po\_C\_Xz6/9  
Chr4\_115910608\_550\_po\_C\_Pz8/12  
ChrY\_13743185\_977\_po\_C\_Xz14/8  
HERV15  
ChrX\_117198092\_983\_po\_C\_Xz8/8  
Chr19\_21166030\_1412\_po\_C\_Xz9/1  
Chr19\_21213743\_913\_po\_C\_Xz14/1  
Chr19\_15957774\_569\_po\_C\_Xz8/10  
Chr11\_77508681\_297\_po\_C\_Xz19/1  
Chr13\_98250769\_738\_po\_C\_Xz7/13  
Chr6\_39968183\_513\_po\_C\_Pz10/9  
Chr15\_66867263\_645\_po\_C\_Xz11/1  
HERV18\_polputein  
HERVIP10FH\_polputein  
MER66\_polputein

HERVI\_polputein  
HERVIP10F\_polputein  
HERVadp\_AC005741  
HERV-PT47D  
HERV\_W\_chr6\_141432567\_ERV9\_lik  
ERV9\_PH1\_RT  
Chr13\_54564403\_572\_po\_C\_Yz7/14  
HERV\_Y\_chr12\_51022911\_pol  
HERV17\_polputein  
HERV\_W\_chr7\_9105739\_syncytin\_p  
HERV9\_polputein  
HUERS-P3\_polputein

-----PRTGVIMTLMVPQEE  
-----PGTGVIMTLVVPREE  
-----PRTGVIMTLMVPREE  
-----AKVTGMGVIMTLMVPREE  
-----PGTGVIMTIIIVPREL  
-----ATGVIMTLTVPREE  
-----ATGVIMTLTVPREE  
-----ATGVIMTLTVPREE  
-----AGPRED  
-----ATGVIMTLTVPREE  
-----ATGVIMTLWSPERR  
-----  
-----QGSLLQLKLPGTGVIMALTVPWEE  
-----PGTGVIMTLMVPREE  
-----PQAEWRLYMKY  
-----  
-----PTPLFQ  
-----MVLTFVTLQAEWRLYKKRFQ  
-----NLTDPKAMVLTTLVLTQTEEWRLYTK  
-----PQVAMTLNLTLPKAMVILITIPQTDKWRRLYTK  
-----  
-----TPLQCMLKNFKKSYAECCG-----  
-----AK  
-----AK  
-----AQITFGPQGDVTLNLAHSEAMVLTTLVPRAEWRLYAG  
-----PQGDMTLKLTYPKAMVLTTLTIPQTEEWRLYTK  
-----A  
-----QRKVMVLTTLTIPKTDEWRLHESSCQE  
-----PRTERAMVLTTLTIQKTEEWRLYESNCQE  
-----QISFTLEGDMTTLNLGQRKAIIMTLTVPPTTEEWRLYER-CKI  
-----  
GVHAEKLLKGFNGDYGVKLTPQKLRTLCEIDWPSFNWGPHEELES-PPP  
-----  
-----NMTLEVKGPKAMVLTLLALLIAEWRRLYE  
-----NLTHPKAIVLTTLTIPQAEWRLHRRKQLQ  
-----  
-----PRSGGYMQ  
-----AQITYGPQGNVTLNLAHLETMVLTLTVPQAEW  
-----  
-----GRKLRKASNSP-----NP  
-----NPLVWLREGNRRGGLTIT-----PL  
GIGLQVSPRGFLTSLNLLTTADEKIYINPSVWSKEGNZGKLRVP-----PI  
-----NMGNKLPICCPLEEGINPEVWALEGQFGRAKN  
-----NIGEGTPVCCPILLEELILKSRQKDNIDEQR-  
-----  
-----NIGEGTPVCCPILLEEGINPEVWATEGQYGRAKN  
-----

ERVfrd\_AC004022  
PRIMA41\_polputein  
HERV\_H\_RGH1\_pol  
HERVHRGH2\_pol  
HERV\_H48I\_polputein  
HERV\_H\_RTVLH2\_pol  
HERVVFH21\_pol  
HERVVRblike\_chr4\_109047953  
ChrY\_13790029\_693\_po\_C\_Xz12/11  
HERVS71\_polputein  
BaEV\_M7\_pol  
HERVR\_polputein  
AKR\_MLV\_MLOCG\_RT  
GaLV\_pol  
Chr3\_158587414\_1662\_po\_C\_Ez10/  
Chr3\_79627623\_1138\_po\_C\_Ez4/7  
Chr19\_20477244\_1350\_po\_C\_Ez10/  
Chr5\_111890459\_1626\_po\_C\_Ez10/  
ChrX\_48766518\_1600\_po\_C\_Ez6/3  
ChrX\_152580713\_1572\_po\_C\_Ez10/  
ChrX\_139287533\_1154\_po\_C\_Xz8/4  
Chr2\_52615786\_912\_po\_C\_Xz11/5  
HERV-E\_4\_1  
ChrY\_21962399\_1137\_po\_C\_Xz13/9  
ChrY\_8634032\_950\_po\_C\_Xz14/10  
Chr3\_126735360\_997\_po\_C\_Xz5/10  
Chr3\_126713203\_958\_po\_C\_Xz7/8  
Chr3\_75226118\_977\_po\_C\_Xz8/9  
Chr7\_6629919\_827\_po\_C\_Xz8/7  
Chr4\_9166812\_811\_po\_C\_Xz8/10  
Chr12\_8478642\_834\_po\_C\_Xz12/7  
Chr10\_15187175\_787\_po\_C\_Xz11/5  
Chr11\_71819740\_854\_po\_C\_Xz11/9  
Chr11\_71519974\_886\_po\_C\_Xz13/9  
Chr8\_7271441\_969\_po\_C\_Xz10/6  
Chr8\_11770066\_826\_po\_C\_Xz9/8  
Chr4\_4128362\_651\_po\_C\_Xz7/11  
Chr14\_50203955\_850\_po\_C\_Xz10/8  
Chr14\_50205291\_837\_po\_C\_Xz10/8  
Chr7\_6597120\_842\_po\_C\_Xz7/7  
Chr11\_71544658\_783\_po\_C\_Xz8/13  
Chr11\_67999520\_760\_po\_C\_Xz8/8  
Chr3\_75461975\_796\_po\_C\_Xz7/9  
Chr12\_52228939\_692\_po\_C\_Xz3/10  
Chr10\_15211234\_286\_po\_C\_Xz11/1  
Chr12\_100973302\_945\_po\_C\_Xz12/  
Chr19\_9685420\_817\_po\_C\_Xz6/10  
Chr13\_40936820\_719\_po\_C\_Xz9/10  
Chr7\_63858202\_1754\_po\_C\_Rz12/9  
ERV3\_chr7q21\_AC073210\_polputei  
Chr6\_110218096\_843\_po\_C\_Xz16/8  
Chr6\_110214535\_786\_po\_C\_Xz16/8  
ChrY\_3018841\_881\_po\_C\_Rz9/12  
ChrX\_86876098\_639\_po\_C\_Xz7/8  
Chr14\_68899917\_965\_po\_C\_Xz6/8  
ChrY\_23874437\_661\_po\_C\_Xz15/9  
ChrY\_27518418\_649\_po\_C\_Xz15/9  
ChrY\_25016892\_657\_po\_C\_Xz13/12  
ChrY\_19932937\_520\_po\_C\_Xz10/14  
ChrY\_20104614\_518\_po\_C\_Xz10/14  
Chr19\_58660155\_598\_po\_C\_Xz21/1  
Chr19\_58621153\_500\_po\_C\_Xz21/1  
Chr7\_139686987\_710\_po\_C\_Xz11/7  
Chr7\_137651301\_1097\_po\_C\_Pz13/  
Chr11\_29579197\_930\_po\_C\_Pz8/12  
Chr4\_117329205\_488\_po\_C\_Xz3/16  
Chr21\_38522185\_383\_po\_C\_Xz7/9  
Chr4\_70173370\_1049\_po\_C\_Xz11/8  
Chr4\_70022513\_788\_po\_C\_Kz10/12  
Chr14\_105225894\_1027\_po\_C\_Xz13  
Chr7\_119241536\_761\_po\_C\_Xz11/1  
ChrY\_22564970\_567\_po\_C\_Xz9/10  
Chr21\_14409346\_1477\_po\_C\_Pz5/6  
ChrX\_51259700\_1396\_po\_C\_Pz7/8  
Chr6\_64985396\_1041\_po\_C\_Xz11/1  
ChrY\_20355209\_659\_po\_C\_Xz7/11  
Chr3\_34567166\_523\_po\_C\_Xz8/6

-----GRKVNRLDSSLPIEVTSQINPVVWDIEVP-DKALN  
-----  
-----PTLKHATFPYPPS-----VVNPAVZDTSTPSVAEH  
---ASLTIPRLZHTHCHLFPSSKPPSHPLVSPLLNPQVZDTSIPSLVTD  
-----ASPAPDPSPOHPLPTS-----LVNPPVWDTTPSIAAH  
--PPEHGLQLQALLVSTEAPHPEVEAIPQEVFDKVKPEVWAZDQPEREIN  
----PPENKTNPLLLELQTLFP-----ZVWAEPPIPPGRAKHH----PPV  
-----LPV  
-----  
RLHETSKEPDVSLGSTWLSDFP-----QAWAETGGMGLAVRQ----APL  
-----  
EWRLFLLI ZPGRETKPALAKZWP-----RVWTEDNPPGLVVNQ----APV  
EWRLFLETEPGQEI KPALAKQWS-----RVWAEDNPPGLVVNQ----APV  
EW-----EIQPALAERWS-----ZEWTEDNPPGLAANQ----API  
EWRLFLETEPGQGI KPALAKQWP-----ZIWAEDNPPGLVVNQ----APV  
EWRLFLETEPGQEI KPALAKRWP-----RIWADDNPPGLVVNQ----DPV  
-----P-----QVWAEDNPPGLVVNQ----APV  
EZRLFLETEPGQEI KPALAKRWP-----ZVWAEDNPPGLAINQ----APV  
EWRLFLETKPGQEI GPALAKRZP-----KVWAEDNPT-----GPI  
-----  
EGRLYITEPGQEI GPAVAKWWP-----RVWVEDNPLPGLAINQ----APV  
-----A-----QVWAEDNPLGLMVNK----ASI  
EWRVFLTEPGQERRPALAKRWP-----RVRAEENPPGL-----  
EWRVFLTEPGQERRPALAKRWP-----RVRAEENPPGL-----  
EWRLFLENEPGQERRPALAKPWP-----KVRAEDNPLPGL-----  
EWRLFLETEPGQERRPALAKRWP-----RARAEDNPPGL-----  
EWRLFLETELQERRPALAKRWP-----RVRAEDNPPGL-----  
EWRLFZTEPDQERRPALAKRWP-----RVWQKTTLRDW-----  
EWRLFZTEPSQERRPALAKRWP-----RVRAETTLRDL-----  
ERRLFZTEPGQERRPALAKRWP-----RVWAEDNPPGL-----  
EWRLFZTELGQERRPALAKRWP-----RVRVEDNPPGL-----  
EWRLFZTDPGKEKRPALAKRWP-----RVRAEENPPGL-----  
EWRLFZTEPGQE-RPALAER-A-----K SMAEDNPGAL-----  
EWRL LZTEPGQERRPALAKRWP-----RVWAEDNPPGL-----  
EWRLFZTEPGQEI R PALAKRWP-----RVWAEDNPPGL-----  
EWRLFZTEPGQEI R PALAKRWP-----RVWAEDNPPGL-----  
QLWLS---GGQEYR-----QKTTLQGW-----  
EWRV FELRRAKREDQLWLSGGQ-----EYGQKTT HQGW-----  
NGDFCELNRAKREDQLWLSRGQ-----EYGQKTT HQGW-----  
-----AKREDQLWLSGGP-----EYRQKTTLWDW-----  
---AQVTDGGLDWTPLS-----  
--RTIL TSLNDIPEPSLCN-----FSL-----  
EWRLFLETEPGQEI KPALAKRWRPVWASPGLTVNQAPILI-----  
-----PQVZAEDNP-----LELAVNQTPILI-----  
ERRLFELSQAKREDQLWLSGGQ-----EYQETSLRDW-----  
APMQPCTQEEKLLFRPIDKIP-----GVWAEDKP-PGLAVN---NQAL  
RHQCSLTQEEKLLFRPIDKIP-----GVWAEDKP-PGLAVN---NQAL  
-----AV-----NQAL  
-----AV-----NQAL  
--AKGLLKPPELHLYGLPSKIP-----GVGZRZAP-WTGWN---QAPV  
--AKGLLKPPELDEL YGLPSKIP-----GVGZRZAP-WTGWN---QAPV  
-APDLP HMLGIEELFGLLTKIP-----EYGLKITL-WDGCK---LALV  
QSPLESHKPGLEKVFLLGKIF-----GVWANNNP-LSLAVKAVNQALI  
-----PGLEKVFLLGKIF-----GVWANNNP-LSLAVKAVNQARI  
QSPLESHKPGLEKVFLLGKIF-----GVWANNNP-LSLAVKAVNQALI  
QSPELSQKPGLEKLFMLPGKIF-----GLWAKNNP-LGLAL---NQAPV  
QSPELSQKPGLEKLFMLPGKIF-----GLWAKNNP-LGLAL---NQAPV  
APMQPHTQVEEKLLFQLVKDIP-----GVQAEDNP-RGLAVN---HAPV  
VPVQPHMQEEQKSLFQLAKEIP-----GVZAEDNP-PGLAVN---HAPV  
APMQPHTQVEEKLLFQLVKEIT-----GVWAEDNP-PGLAVN---HAPV  
KPPLESHKPGILELZRLLNKIP-----GVWAEDNP-PGLAKD---ZMPV  
ESP----EPGINELYGLLNKIP-----GVWAEDNP-PGLAKN---QAPV  
-----  
KTL----EPRVNEMPGLLTKIP-----RVWADSNP-PGLAVS---QAPV  
KTP----EPGVNEMHGLLTKIP-----EFGLKVITWTGASVN---QAPV  
KTP----EPGVNZMRGLLTKIT-----GVWAESNL-PELAVN---PAPI  
ESP----ELGINELHEL FRYRIP-----GVZAEDNP-PGLPEN---QASV  
QVPLKQGLLPLEKYGLVTKIP-----RVWAENNP-PGLAVN---QAPV  
YGRYSVAEREKLF TDL LKLS-----GVWAEDSPPGLVVNQ----APV  
CGKRYTVAKGEKLF TDL LKLP-----GVWAEDNPTGLAVNR----APA  
CKDAFCQWENEAMYKELFLKLP-----GVLVEDNPPGLAINQ----APV  
-----AMYKELFLNLA-----GVWVEDSLPELAINQ----APV  
-----QWGNEAIYEELFLKLP-----GVWAEDNPLPGLAINQ----ASV



Chr3\_122072468\_245\_po\_C\_Xz9/9  
Chr11\_58788475\_541\_po\_C\_Xz8/22  
Chr6\_137421042\_373\_po\_C\_Xz6/9  
Chr4\_115910608\_550\_po\_C\_Pz8/12  
ChrY\_13743185\_977\_po\_C\_Xz14/8  
HERV15  
ChrX\_117198092\_983\_po\_C\_Xz8/8  
Chr19\_21166030\_1412\_po\_C\_Xz9/1  
Chr19\_21213743\_913\_po\_C\_Xz14/1  
Chr19\_15957774\_569\_po\_C\_Xz8/10  
Chr11\_77508681\_297\_po\_C\_Xz19/1  
Chr13\_98250769\_738\_po\_C\_Xz7/13  
Chr6\_39968183\_513\_po\_C\_Pz10/9  
Chr15\_66867263\_645\_po\_C\_Xz11/1  
HERV18\_polputein  
HERVIP10FH\_polputein  
MER66\_polputein

HERVI\_polputein  
HERVIP10F\_polputein  
HERVadp\_AC005741  
HERV-PT47D  
HERV\_W\_chr6\_141432567\_ERV9\_lik  
ERV9\_PH1\_RT  
Chr13\_54564403\_572\_po\_C\_Yz7/14  
HERV\_Y\_chr12\_51022911\_pol  
HERV17\_polputein  
HERV\_W\_chr7\_9105739\_syncytin\_p  
HERV9\_polputein  
HUERS-P3\_polputein  
ERVfrd\_AC004022  
PRIMA41\_polputein  
HERV\_H\_RGH1\_pol  
HERVHRGH2\_pol  
HERV\_H48I\_polputein  
HERV\_H\_RTVLH2\_pol  
HERVHF21\_pol  
HERVRblike\_chr4\_109047953  
ChrY\_13790029\_693\_po\_C\_Xz12/11  
HERVS71\_polputein  
BaEV\_M7\_pol  
HERVR\_polputein  
AKR\_MLV\_MLOCG\_RT  
GaLV\_pol  
Chr3\_158587414\_1662\_po\_C\_Ez10/  
Chr3\_79627623\_1138\_po\_C\_Ez4/7  
Chr19\_20477244\_1350\_po\_C\_Ez10/  
Chr5\_111890459\_1626\_po\_C\_Ez10/  
ChrX\_48766518\_1600\_po\_C\_Ez6/3  
ChrX\_152580713\_1572\_po\_C\_Ez10/  
ChrX\_139287533\_1154\_po\_C\_Xz8/4  
Chr2\_52615786\_912\_po\_C\_Xz11/5  
HERV-E\_4\_1  
ChrY\_21962399\_1137\_po\_C\_Xz13/9  
ChrY\_8634032\_950\_po\_C\_Xz14/10  
Chr3\_126735360\_997\_po\_C\_Xz5/10  
Chr3\_126713203\_958\_po\_C\_Xz7/8  
Chr3\_75226118\_977\_po\_C\_Xz8/9  
Chr7\_6629919\_827\_po\_C\_Xz8/7  
Chr4\_9166812\_811\_po\_C\_Xz8/10  
Chr12\_8478642\_834\_po\_C\_Xz12/7  
Chr10\_15187175\_787\_po\_C\_Xz11/5  
Chr11\_71819740\_854\_po\_C\_Xz11/9  
Chr11\_71519974\_886\_po\_C\_Xz13/9  
Chr8\_7271441\_969\_po\_C\_Xz10/6  
Chr8\_11770066\_826\_po\_C\_Xz9/8  
Chr4\_4128362\_651\_po\_C\_Xz7/11  
Chr14\_50203955\_850\_po\_C\_Xz10/8  
Chr14\_50205291\_837\_po\_C\_Xz10/8  
Chr7\_6597120\_842\_po\_C\_Xz7/7  
Chr11\_71544658\_783\_po\_C\_Xz8/13  
Chr11\_67999520\_760\_po\_C\_Xz8/8  
Chr3\_75461975\_796\_po\_C\_Xz7/9  
Chr12\_52228939\_692\_po\_C\_Xz3/10  
Chr10\_15211234\_286\_po\_C\_Xz11/1  
Chr12\_100973302\_945\_po\_C\_Xz12/

-----ASGKMRQCIRNYFSSCQ-----GSGWKTVPR-LAINQ----AHV  
YAPIYSSLARLRQEAAALASGG-----SDSEESTPQAIPCRE----DPE  
-----  
--ARRIPELDLHSMZGMLFKVP-----GVWAEDNPPGLAVNR----HPV  
--ARRIPELDLHSMZGMLFKVP-----GVWAEDNPPGLAVNR----HPV  
-----VTRTDLHNIWGLFKVP-----GVWAEDYP-GLAANR----PPV  
LCTRRLLELDLHNTWGLFKVP-----GVWAEDNPPGLVLRN----PPV  
-----  
APVQLHTRKEEKLLFGLVKNIP-----KVZAEDNPPRLAVNH----PPV  
-----AWGSSVKSISKF----SPV  
-PVQPRMQDEEKZLFQLVREIP-----RVWAEDNPPGLAVNH----APV  
KYHLSRPLSEPLKIYELIVKIP-----GVWAKDNPPGLAVNQ----ALV  
RLYKKTLEPGVNMHGVLTKIP-----GVWAESNPLGLAVNQ----APV  
-----  
-----AASGVRNQPTQCEEZP--ELSATRKETGQQPSLKDHPHILWRRL  
-----

HQANTPH-----WEVVRKQFPPIPLEGMLGLKPIIES-----  
-----  
QIELKQA-----EEVVCRKQYPIISLEGRKCLQPVIIE-----  
HIKLTTP-----GEVVRKQZLIPLQGRIGLKRRIIEG-----  
-----  
AHPVQIR-----LKDPT-TSLSKAI SLRPEAHKGLQNI VKH-----  
AHPVQVK-----LKD-----SASFYPLRPKAQQLQKIVKD-----  
-----PQV-----TKGFCLLSLQRQYPLRPKAKQRLQKIVKD-----  
-----  
ARPVQVK-----LKDSTSFYQRYPLRPKAQQLQKIVKD-----  
-----  
-----  
VPLVCIZ-----LKPDALYSWKRQDPLKPEAZRGIHPLRTK-----  
-----  
-----  
HTPVIRIT-----LKEPTQFLSQQYPIPQAALIGLKPIISR-----  
HAPLTIS-----LKPNIHPYRQCQYPI PQHALKRLKPVITR-----  
QDPIKIQ-----LKDPSKFPNIPQYPI SLTHQKGLQPI INK-----  
VSPKKNK-----LKEGQPPIRKAIPKREGSLGSIQVHLIW-----  
VVELLAT-----TLPVQVKQZSVSQQARERINPHIQ-----  
VVELLAT-----ALPVQVKQYPMQWAREGINPHIQ-----  
-----  
-----  
I IPLKAT-----STPVSIKQYPMQEARLGKPHIQ-----  
-----GIRPHIQ-----  
LIEVKPG-----AQPIRQKQYPLPREALEGIQVHLRR-----  
LVEVKPG-----AQPIRQKQYPPPREALKGIQVHLRR-----  
LIEVKPG-----PNZLDESSIPS-QEALGIRVHLRC-----  
LIEVKPG-----AQPIRQKQYPPPREALEGIIQAQLRH-----  
LIEVKPG-----AQPIRQKQYPPPREALEGIQVHLRH-----  
HIEVKPG-----AQPIRQKQYPPPREALKGIQVHLRR-----  
LIEVKPG-----GQPIRQKQYPPPREALEGIIQVHLKR-----  
ITEIKPG-----TQPVQRKZYPPPREALEGIQVHLKC-----  
-----  
LIEVEPA-----AQLARQKZYPPVREDLEGIQVYLLK-----  
LIKV-----AQPIRQKQYLVPREALKGIQVHLRY-----  
--PVKTG-----AQPVRRKQDLVPREALQGIQVRLKH-----  
--PVKTG-----AQPVRRKQDPPVREALQGIQVRLKH-----  
--PVKTG-----AQPVRRKQEPVPREALQGIQVCLKH-----  
--PVKTG-----AQPVRRKQDPPVREALQGIQVRLKH-----  
--PVKTG-----AQPVRRKQDPPVREALQGIQVRLKH-----  
--PVKTG-----AQPVRRKQEPVPREALQGIQVPLKH-----  
--PVNTG-----AQPVRRKQEPVPREALQGIQVRLKH-----  
--PVKTG-----ALPVRQKQGPVPREALQGIQVHLKH-----  
--PVKTG-----AQPVRRKQZLVPREALQGIQVRLRH-----  
--PVKTG-----AQPVRRKQDSVPREALQGIQVHLKH-----  
--PVKTG-----AQPVRRKQEPVPREALQGIQVHLKH-----  
--PVKTG-----AQPLRQKQDPPVREALQGIQVHLKH-----  
--PVKTG-----AQPLRQKQDPPVREALQGIQVHLKH-----  
--PVKTG-----AQPLRQKQDPPVREALQGIQVHLKH-----  
--PVKTG-----AQPLRQKQDPPVREALQGIQVHLKH-----  
--PVKTG-----AQPLRQKQDPPVREALQGIQVHLKH-----  
--LVKTG-----AQPLRQKQDLVPREALQGIQVHLKH-----  
--PIKTG-----AQPLRQKQDPPVREALQGIQAPLKH-----  
--PEVLG-----LQALRLASSYPP-----LLF-----  
--PSVMA-----AILTSQ-----  
--EVNPG-----AQPIRQKQYPPPREALERIQVHLRC-----

Chr19\_9685420\_817\_po\_C\_Xz6/10  
Chr13\_40936820\_719\_po\_C\_Xz9/10  
Chr7\_63858202\_1754\_po\_C\_Rz12/9  
ERV3\_chr7q21\_AC073210\_polputei  
Chr6\_110218096\_843\_po\_C\_Xz16/8  
Chr6\_110214535\_786\_po\_C\_Xz16/8  
ChrY\_3018841\_881\_po\_C\_Rz9/12  
ChrX\_86876098\_639\_po\_C\_Xz7/8  
Chr14\_68899917\_965\_po\_C\_Xz6/8  
ChrY\_23874437\_661\_po\_C\_Xz15/9  
ChrY\_27518418\_649\_po\_C\_Xz15/9  
ChrY\_25016892\_657\_po\_C\_Xz13/12  
ChrY\_19932937\_520\_po\_C\_Xz10/14  
ChrY\_20104614\_518\_po\_C\_Xz10/14  
Chr19\_58660155\_598\_po\_C\_Xz21/1  
Chr19\_58621153\_500\_po\_C\_Xz21/1  
Chr7\_139686987\_710\_po\_C\_Xz11/7  
Chr7\_137651301\_1097\_po\_C\_Pz13/  
Chr11\_29579197\_930\_po\_C\_Pz8/12  
Chr4\_117329205\_488\_po\_C\_Xz3/16  
Chr21\_38522185\_383\_po\_C\_Xz7/9  
Chr4\_70173370\_1049\_po\_C\_Xz11/8  
Chr4\_70022513\_788\_po\_C\_Xz10/12  
Chr14\_105225894\_1027\_po\_C\_Xz13  
Chr7\_119241536\_761\_po\_C\_Xz11/1  
ChrY\_22564970\_567\_po\_C\_Xz9/10  
Chr21\_14409346\_1477\_po\_C\_Pz5/6  
ChrX\_51259700\_1396\_po\_C\_Pz7/8  
Chr6\_64985396\_1041\_po\_C\_Xz11/1  
ChrY\_20355209\_659\_po\_C\_Xz7/11  
Chr3\_34567166\_523\_po\_C\_Xz8/6  
Chr3\_122072468\_245\_po\_C\_Xz9/9  
Chr11\_58788475\_541\_po\_C\_Xz8/22  
Chr6\_137421042\_373\_po\_C\_Xz6/9  
Chr4\_115910608\_550\_po\_C\_Pz8/12  
ChrY\_13743185\_977\_po\_C\_Xz14/8  
HERV15  
ChrX\_117198092\_983\_po\_C\_Xz8/8  
Chr19\_21166030\_1412\_po\_C\_Xz9/1  
Chr19\_21213743\_913\_po\_C\_Xz14/1  
Chr19\_15957774\_569\_po\_C\_Xz8/10  
Chr11\_77508681\_297\_po\_C\_Xz19/1  
Chr13\_98250769\_738\_po\_C\_Xz7/13  
Chr6\_39968183\_513\_po\_C\_Pz10/9  
Chr15\_66867263\_645\_po\_C\_Xz11/1  
HERV18\_polputein  
HERVIP10FH\_polputein  
MER66\_polputein

--EVKPG-----AQPVRZKQYVVPREALEGIQVHLMC-----  
--PVKTG-----AQPVRQKQDPVPREALQGIQVRLKH-----  
VVELKPG-----ATPVQVCQYPLSQEDIWGIYKHLKW---LC  
VVELKPG-----ATPVQVCQYPLSQEDIWGIYKHLKW---LC  
VIVELKS-----SNTGQVHQYPLPQEAIQGIEHFHFKW---LL  
VIVELKS-----SNTGQVHQYPLPQEAIQGIEHFHFKW---LL  
TVELKPG-----EIPVVRVCQYPLSQEAVQGIQGHLLKR---LL  
TVELKPG-----EIPVVRVCQYPLSQEAVQGIQGHLLKR---LL  
VVELKPG-----ATPVVRVHQYPLPZEAIWGIYNHLKW---LY  
IVKPKPG-----ATPVQVHQ--PISLRRRHAGYSQTFKV---TL  
IVKPKPG-----ATPVQVHQ--PISLRRRHAGYSQTFKV---TL  
IVKPKPG-----ATPVQVHQ--PISLRRRHAGYSQTFKV---TL  
IVKPKPG-----ATTVEVLQYFPFZEDTQGIHKKHLKZ---LF  
IVKPKPG-----ATTVEVLQYFPFZEDTQGIHKKHLKZ---LF  
VAESKPG-----ATPVSVRQYVVPQKSIQGIKHLER---LY  
VAELKPE-----ATPVVRVHQYVVPQKSVQGIKHLER---LY  
VVELKPG-----ADPVQVHQYVPTQKAVWGIKHLQ---LY  
VVE-----LKP GATP-----VVCQYLVFPEAIZGVHKKHLEZATLLT  
VVENRVVELKPGAVSPVQFSFTPVQFHQYFPFQVEIWDIRKHLE---QLF  
-----  
VVELKS-----SSVQYLLPEAILGVRKYLE---LH  
VVELKLG-----ETPVVRVRSLLPEDIRGVHKKHLEW---LH  
VVELKLG-----ATLVHVRQYPLPEAY--GSPQTLRL---TS  
VVELKPG-----ATPVPLHQYPLFQEDIWIDHKKHLEW---LF  
LVELKPG-----ATLVLSVTFPHISHQGVQKHIDW---LF  
IVELLQG-----TYLVQICQYPIPEVFNQGIKHLER---LY  
VVELLRR-----TYPVIRIRQYLIPMEAYWGIKHLER---LY  
VVELLWG-----TYPVZICHNPIPAEATHGITKHLIDQ-----  
VVELLRD-----TYPVQIRQYSIPVKATHGITKHLIVR-----  
VVELLRG-----NYPVZICQYHMPVEATHGITKHLIDW-----  
VVELLRG-----TYPVZIRQYPIPAEATHGITKHLIDW-----  
PKSQGRN-----SRGMRSATLAQAMPEQCRRPSETWG-----  
-----  
VIELNTH-----AALVZVCQYPLPKEVIEGITOHLNR-----  
VIELNTH-----AALVZVCQYPLPKEVIEGITOHLNR-----  
VAELNPH-----AAPVZVRQYVVPREAIIDGIIKHLNR-----  
VVELNPH-----ATLVZVRZYPLPREATEGITKHLINQ-----  
VVELNPH-----AAPVQVHQYPLPZEAIDRITKHLNW-----  
VVKLKPG-----ATLVVRVQYVVPZEAIZGICKHLDW-----  
VAELKPG-----ATPVVWRQYVVPQKAVGVCKHLER-----  
VVELKPG-----ATPIQVRQYSVPQKAVRGICKHLER-----  
LVELKSG-----ASPVZVRQYVVPIDGIZGVQKHTDQ-----  
VVELKPG-----ATPVQVHQYPLLPDAIRGVHKKHLEW-----  
-----TETIKK-----  
CAQTKEG-----EAAERVKYFLGGRDZGKSRGAVKHS-----  
-----WSKHLKVKMLNLTCEWNRCLNSELXVR---F

HERVI\_polputein  
HERVIP10F\_polputein  
HERVadp\_AC005741  
HERV-PT47D  
HERV\_W\_chr6\_141432567\_ERV9\_lik  
ERV9\_PH1\_RT  
Chr13\_54564403\_572\_po\_C\_Yz7/14  
HERV\_Y\_chr12\_51022911\_pol  
HERV17\_polputein  
HERV\_W\_chr7\_9105739\_syncytin\_p  
HERV9\_polputein  
HUERS-P3\_polputein  
ERVfrd\_AC004022  
PRIMA41\_polputein  
HERV\_H\_RGH1\_pol  
HERVHRGH2\_pol  
HERV\_H48I\_polputein  
HERV\_H\_RTVLH2\_pol  
HERVVFH21\_pol  
HERVRblike\_chr4\_109047953  
ChrY\_13790029\_693\_po\_C\_Xz12/11  
HERVS71\_polputein  
BaEV\_M7\_pol  
HERVR\_polputein  
AKR\_MLV\_MLOCG\_RT  
GaLV\_pol  
Chr3\_158587414\_1662\_po\_C\_Ez10/

-LINDGELLEPCMSPYNTPIIPVKK-----SDGSYRLVKDLRAIN-----  
-----PILPVKK-----SDGSYRLVQDLRAIN-----  
-LIKDGELLEPCMSPYNTPIIPVKK-----SPGLYRLVQDLRTIN-----  
-LIKDGLLKSRMFPITPPIIPVKK-----SDGSYQLVQDLRAIN-----  
-----PCNTTILGVQKLN-----GQWRLVQDLRLIN-----  
-LKAQGLVLRKCSPPCNTPILEVQRP-----RLVQDLRLIN-----  
-LKAQGLVKACNSHCSTPILGVQKPN-----RQZRLVQDLRIIS-----  
-LKAQGLVKPCSSPCNTPIILGVQKPN-----GQZRLVQNLRIIFS-----  
--AQGLVKPCSSPCNTPIILGVQKPN-----GQWRLVQDLRIIN-----  
-LKAQGLVKPCSNPCSTPILGVQKPN-----RQWRLVQDLRIIN-----  
-----  
-----NTPILGVQKPN-----GEWRLVQDLCLIN-----  
--THGLIS--CNSPYNTPIITVKKTN-----GEYRLVQNLZVIN-----  
-FLQFGLLRPFKPCNTLILPKKPN-----GDYIFVQDLZAVN-----  
-----  
-----  
-LLASHLLRPTNSPFNTPVLVKKPD-----GTYRLVQDLRLIN-----  
-LLQHGLLKPINSYHSPILPVKPD-----KAYRLVQNLHLIN-----  
-LCSRLLRPTRSPYNTSILPVKKS-----GSYQLVQDLRAIN-----  
-FLQYGLIRPCQSSYDTPFLPLKPKHS-----HKYRFVQDHRAIN-----  
-LLQTGILTPCQSIWNTPFVQK-----PRTNDYWPVQDLTEVN-----  
-----SAWNTPFLLVQK-----PGTNDYRPVQDLREIN-----  
-----WNTPLLVPK-----PGTQDYRPVQDLREIN-----  
-----WNTPLLVPK-----PGTQDYRPVQDLREIN-----  
-LLDQILVPCQSPWNTPLLVPK-----PGTNDYRPVQDLREIN-----  
-FLDLGLVLPVPCSPWNTPLLVPK-----PGTNDYRPVQDLREIN-----  
-LKAYGIVPCQALWNTPLLVPK-----PGTKDYHPVQDLCLVN-----

Chr3\_79627623\_1138\_po\_C\_Ez4/7  
Chr19\_20477244\_1350\_po\_C\_Ez10/  
Chr5\_111890459\_1626\_po\_C\_Ez10/  
ChrX\_48766518\_1600\_po\_C\_Ez6/3  
ChrX\_152580713\_1572\_po\_C\_Ez10/  
ChrX\_139287533\_1154\_po\_C\_Xz8/4  
Chr2\_52615786\_912\_po\_C\_Xz11/5  
HERV-E\_4\_1  
ChrY\_21962399\_1137\_po\_C\_Xz13/9  
ChrY\_8634032\_950\_po\_C\_Xz14/10  
Chr3\_126735360\_997\_po\_C\_Xz5/10  
Chr3\_126713203\_958\_po\_C\_Xz7/8  
Chr3\_75226118\_977\_po\_C\_Xz8/9  
Chr7\_6629919\_827\_po\_C\_Xz8/7  
Chr4\_9166812\_811\_po\_C\_Xz8/10  
Chr12\_8478642\_834\_po\_C\_Xz12/7  
Chr10\_15187175\_787\_po\_C\_Xz11/5  
Chr11\_71819740\_854\_po\_C\_Xz11/9  
Chr11\_71519974\_886\_po\_C\_Xz13/9  
Chr8\_7271441\_969\_po\_C\_Xz10/6  
Chr8\_11770066\_826\_po\_C\_Xz9/8  
Chr4\_4128362\_651\_po\_C\_Xz7/11  
Chr14\_50203955\_850\_po\_C\_Xz10/8  
Chr14\_50205291\_837\_po\_C\_Xz10/8  
Chr7\_6597120\_842\_po\_C\_Xz7/7  
Chr11\_71544658\_783\_po\_C\_Xz8/13  
Chr11\_67999520\_760\_po\_C\_Xz8/8  
Chr3\_75461975\_796\_po\_C\_Xz7/9  
Chr12\_52228939\_692\_po\_C\_Xz3/10  
Chr10\_15211234\_286\_po\_C\_Xz11/1  
Chr12\_100973302\_945\_po\_C\_Xz12/  
Chr19\_9685420\_817\_po\_C\_Xz6/10  
Chr13\_40936820\_719\_po\_C\_Xz9/10  
Chr7\_63858202\_1754\_po\_C\_Rz12/9  
ERV3\_chr7q21\_AC073210\_polputei  
Chr6\_110218096\_843\_po\_C\_Xz16/8  
Chr6\_110214535\_786\_po\_C\_Xz16/8  
ChrY\_3018841\_881\_po\_C\_Rz9/12  
ChrX\_86876098\_639\_po\_C\_Xz7/8  
Chr14\_68899917\_965\_po\_C\_Xz6/8  
ChrY\_23874437\_661\_po\_C\_Xz15/9  
ChrY\_27518418\_649\_po\_C\_Xz15/9  
ChrY\_25016892\_657\_po\_C\_Xz13/12  
ChrY\_19932937\_520\_po\_C\_Xz10/14  
ChrY\_20104614\_518\_po\_C\_Xz10/14  
Chr19\_58660155\_598\_po\_C\_Xz21/1  
Chr19\_58621153\_500\_po\_C\_Xz21/1  
Chr7\_139686987\_710\_po\_C\_Xz11/7  
Chr7\_137651301\_1097\_po\_C\_Pz13/  
Chr11\_29579197\_930\_po\_C\_Pz8/12  
Chr4\_117329205\_488\_po\_C\_Xz3/16  
Chr21\_38522185\_383\_po\_C\_Xz7/9  
Chr4\_70173370\_1049\_po\_C\_Xz11/8  
Chr4\_70022513\_788\_po\_C\_Kz10/12  
Chr14\_105225894\_1027\_po\_C\_Xz13/  
Chr7\_119241536\_761\_po\_C\_Xz11/1  
ChrY\_22564970\_567\_po\_C\_Xz9/10  
Chr21\_14409346\_1477\_po\_C\_Pz5/6  
ChrX\_51259700\_1396\_po\_C\_Pz7/8  
Chr6\_64985396\_1041\_po\_C\_Xz11/1  
ChrY\_20355209\_659\_po\_C\_Xz7/11  
Chr3\_34567166\_523\_po\_C\_Xz8/6  
Chr3\_122072468\_245\_po\_C\_Xz9/9  
Chr11\_58788475\_541\_po\_C\_Xz8/22  
Chr6\_137421042\_373\_po\_C\_Xz6/9  
Chr4\_115910608\_550\_po\_C\_Pz8/12  
ChrY\_13743185\_977\_po\_C\_Xz14/8  
HERV15  
ChrX\_117198092\_983\_po\_C\_Xz8/8  
Chr19\_21166030\_1412\_po\_C\_Xz9/1  
Chr19\_21213743\_913\_po\_C\_Xz14/1  
Chr19\_15957774\_569\_po\_C\_Xz8/10  
Chr11\_77508681\_297\_po\_C\_Xz19/1  
Chr13\_98250769\_738\_po\_C\_Xz7/13  
Chr6\_39968183\_513\_po\_C\_Pz10/9  
Chr15\_66867263\_645\_po\_C\_Xz11/1  
HERV18\_polputein

-LKAFGIIVPCQSPWNTPLLPVK----PGTKDYRPVQDLRLVN-----  
-FKAYGIIVLCQCPWNTPLLPVK----PGTKDYQPVDLRLVN-----  
-LKAYGIIVPCQSPWNTPLLPVK----PGTKDYZPVQDLRLVN-----  
-LKAFGIIVPCQSPWNLPLFPVK----PGTKDYQPVDLCLVN-----  
-LKAFGIIVPCQSPWEHPLLPVK----PGTKDYR-VQDLRLVN-----  
-LKAFGIIVPCQSPWN-PLLPVK----PVTKYRVPVQDLHLVN-----  
-LRAFGIIVPCQSPWNTPLLPVK----SGTKDYRPVQDLCLVN-----  
-LRTFRIIVPCQSPWNTPLLPVK----PGTKDYRPVQDLRLVN-----  
-LKAFGIIVPCQSPWNTPLLPVK----PGTKYRVPVQDLHLVN-----  
-LIAYGIIVPCQSPWNKPLLPVK-----DCQPVQHLRLVN-----  
-LRTFGIIVPCQSPWNTPLLPVK----PRTKYRVPVQDLRLLH-----  
-LRTFGIIVPCQSPWNTPLLPVK----PRTKYRVPVQDLRLLH-----  
-LRTYGIIVPCQCPWNTPLLPVK----PQTKDYRPVQDLRFLH-----  
-LRTFGIIVPCQSPWNTPLFPVK----PPTKYRQVQDLCLLH-----  
-LRTFGIIVPCQSPRNTPLLPVK----PRTKYRVTVQDLRLLH-----  
-LRTFGIIVPCQSPWNTPLLPVSK----PRTKYRVPVQDLHLLH-----  
-LRTFGIIVPCQSPWNTPLLPVK----PRTKYQLVQDLRLLH-----  
-LRTFGIIVPCRSWNTPLLSVVK----SRTKNYQPVDLRLH-----  
-LRTFGIIVPCQSPWNTPLLPVK----PRTKYRVPVQDLRLLH-----  
-LRTFGIIVPCQSPWNTPLLPVK----PRTKYRVPVQDLRLLH-----  
-LRTFGIIVPCQSPWNTPLLPVK----PRTKYRVPVQDLRLLH-----  
-LRTFGIIVPCQSPRNTPLLPVK----PWTKDYSPGQDSRLLS-----  
-LRTFGIIVPCQSPRNTPLLPVK----LWTKDYRPGQDLRLLS-----  
-LRTFVMIVPCRSWNTPLLPVK----LWTKDYRPGQDLRLLS-----  
-LRTFGIIVPCQSPWNTPLLPVK----PWAZDYRPGZDSRLLS-----  
-LRTFGIIVPCQSPRNTPLLPVK----PCTKDR-----IRTCLE-----  
-LRTFGIIVPCQSPQNTPLLPVK----PWTKDYRLGQDLRLLS-----  
-LRTFGIIVPCQSPWNTPLLPVK----PRTKYRSPGQDLRLLN-----  
-LKLFSFICCTSCQVYTPLLPVK----PGTKDYRPVQDLRLVN-----  
-LVPVMDLAGYQSAKZ-----PK-----TAFQERREGFTNWF-----  
-LKAYGIIVPCQS-HGTPLLPVK----PGTKDYZPVQDLRLVN-----  
-VKACGVIIVPCQSPRSTPLLPVK----PGTKDYRPAQDLRLVN-----  
-LRTFGIIVPCQSPWNTPLLPVK----PRTKYRPLVQDLRLLN-----  
DHGII---IQCQSPWNTPLLLVQKPLPGPSDEYIPVQGLHAVN-----  
DHGII---IQCQSPWNTPLLLVQKPLPGPSDEYIPVQGLHAVN-----  
EHGII---AZCQSSWNTPLLLVQK----PESNQYRVPVQDLHAVTSAGYRP-----  
EHGII---AZCQSSWNTPLLLVQK----PESNQYRVPVQDLHAVTSAGYRP-----  
EHRVL---AQCWSPWNTPLLPVVK----PGTNEYRLVQNLHAVN-----  
EHRVL---AQCWSPWNTPLLPVVK----PGTNEYRLVQNLHAVN-----  
DPGIL---VQYQSPWNTPLLPVQK----PGSGEYRLAQDLHAVN-----  
QTQNLVQVWCEWSPWNTPLLPKQV----TESGKSKPVQNLHEMN-----  
QTQNLVQVWCEWSPWNTPLLPKQV----TESGKSKPVQNLHEMN-----  
QTQNLVQVWCEWSPWNTPLLPKQV----TESGKSKPVQNLHEMN-----  
KHRNF---VWRQSTWNTPLLPVQK----PGSGYRVPVQDLHAVN-----  
KHRNF---VWRQSTWNTPLLPVQK----PGSGYRVPVQDLHAVN-----  
KHKIL---VQCZSPZNTPLLTQKPLPGPSNEYRVPVQDLHAVN-----  
KHKIL---VQCZSPZNTPLLTQKPLPGPSNEYRVPVQDLHAVN-----  
KQGIL---VQCQLPWNTPLLPVQKPLPGPSDEYRVPVQDLHAVN-----  
WNVVV---VKFQSPWNTPLLPVQK----PSGEYRVPVQDLCAVNH-----  
KHGII---VKCQSPWNTPLLPVQK----PSGEZRLVQDLCAVNE-----  
-----NSKRLRTLCEIEW-----PSFNVRRLAETIDRE-----  
-----IKLTPQRLRTLCEIEW-----TSFVVRWVVEGTIDRE-----  
KHGII---VKCQSPWNTPLLPVVK----PSGEYRVPVQNLVCEVZ-----  
KHGII---AKCQSPWNTPLLPVVK----PSGEYRVPVQDLHSENQ-----  
QVGTI---VKCQSLWNTPLLPVVK----PSGEYRVPVQDLCAVNV-----  
KHGII---VKCQSPWNTPLLPVQK----PSGEYRVPVQDLRAIT-----  
KNRII---VKCRZVWNTPLLPVZK----PSGEYRVPVQDLRAIN-----  
-LLEFGIIEERCWSSWNTPLLPVVK----LSGDYWPVQDLKALN-----  
-LLEFVIIIEECTSSWNTPLLPVVK----PSGDYQPVDZKAVN-----  
-FLKFGIIEERCASSWNTPLLPVVK----PPGEYRVPVQDLWAVN-----  
-LFKFGIIEERCASSWNTPLLPVVK----PIGDYWLAQDLQAIH-----  
-LLKFGIIEERCASSWNTPLLPVVK----PSGDYRPLQDLQAVN-----  
-LLKFGIIEERCASSWNTPLLPVVK----PSRDYQPVKDLRAIN-----  
-QIYLNAQNEVEGGEWLFYQPF-----TTDLNWRQHTPSYA-----  
-----PQVS-----  
-LYEQGIIVKCKSSWNTPLQPVK----PNGEYRVPVQDFWVAN-----  
-LYEQGIIVKCKSSWNTPLQPVK----PNGEYRVPVQDFWVAN-----  
-LYTHGIIVKCKSSWNTPLPVMK----SNGEYRVPVQDLRVVN-----  
-LYEHEIIVKYKSSWNTPLLPVVK----PNGEYRVPVZDLQVNV-----  
-LYMHEIIVKCKSSWNTPLLPVVK----PNGEYRVPVQDLWAVN-----  
-LYKRIILVRCQSPRNTPLLPVZKPTPGPSNVYRVPVQDLRARN-----  
-LYKYGILIRCS-RNTPLLPVZKPLLGPRSEZIPVQDLHAVN-----  
-LYKRIILVRCQSPWNTPLLPVZKPTPGPESDEYRVPVQDLRAVN-----  
-LFKHGIIIVKCRSPWNTPLLPVQK----SGKYKPVQNLHAIN-----  
-LKHGIIIVKCRSPWNTPLLPVQK----SGEYRVPVQDLHAVN-----  
-LKEVQIVRGTHSPYNFLVWPVVK----PDGTWRMTVDYRELN-----

HERVIP10FH\_polpatein -LVRTYQGERNRRRAVKHSLVG-----TRERKPQGVVVKYLS-----  
MER66\_polpatein KILNCKIVLIYRXPMSGGQFRISCSLX-----LYKMCQRNVFFIG-----

HERVI\_polpatein -----QTVQTTNPVVPNPYTLISK--IPYNHQWFTVIDLKD  
HERVIP10F\_polpatein -----QIVQTTHPVVPNPYTLISK--IPYNHQWFTVIDLKD  
HERVadp\_AC005741 -----QIIQTRHPVMPNPYTFRLK--IPYEHWFRVVDLKD  
HERV-PT47D -----QIVQTTHPVVPNPYTLISK--IPYNHQWFTVIDLK-  
HERV\_W\_chr6\_141432567\_ERV9\_lik -----EAVIPLYVVPNPYIILLSQI--PEEAERFMVLDLKD  
ERV9\_PH1\_RT -----EAVISLYPVVPNPYTLLSQI--PEEAWEFTVLDLKD  
Chr13\_54564403\_572\_po\_C\_Yz7/14 -----EAVVPLYPAVPSHTLLSQI--PEEAWEFTVLDLKD  
HERV\_Y\_chr12\_51022911\_pol -----EUVVPLDPAVNPYTLLSQI--PEEAWEFTVLDPKD  
HERV17\_polpatein -----EAVVPLYPAVNPYTLLSQI--PEE-QWFTVLDLKD  
HERV\_W\_chr7\_9105739\_syncytin\_p -----EAVVPLZPAVPSPYTLLSQI--PEEAWEFTVLDLQD  
HERV9\_polpatein -----PQG  
HUERS-P3\_polpatein -----EAVVP IHPVVPNPYTLTQI--PEGTKWFTVLDLKD  
ERVfrd\_AC004022 -----EAVVRIHPMPQP--LCNSRR--FPDAQWFSVLDPFKN  
PRIMA41\_polpatein -----SAVIPKHPVVLNPMYLLPG--LGDASFVTVLDDR  
HERV\_H\_RGH1\_pol -----SI--PPSTTHYSVLDLKH  
HERVHRGH2\_pol -----QAVLPVCPVVPNPYTLLSAI--PSNTTHFSVLDLKD  
HERV\_H48I\_polpatein -----QIVLPIHPMVPNPYTLSSSI--PPSTTHYSVLDLKH  
HERV\_H\_RTVLH2\_pol -----QAVLPIHPVVPNPYTLLSLI--PSNTTHYTAIDLKD  
HERVVFH21\_pol -----DTVEDIHPIVANPYTMFASL--PKDHEWFTVLDLKD  
HERVrblike\_chr4\_109047953 -----RQIVTVHPTVNPYTLRL--LPPEHTICTVLDLKD  
ChrY\_13790029\_693\_po\_C\_Xz12/11 -----KWTVTVHPTVNPYIILLGL--LPPEHTAYTVLDLKD  
HERVS71\_polpatein -----KRTVDIHPVVPNPYNLLST--LKPDISWYTVLDLKD  
BaEV\_M7\_pol -----KRTVDIHPVVPNPYNLLST--LKPDISWYTVLDLKD  
HERVR\_polpatein -----KRVEDIHPVVPNPYNLLSG--LPPSHQWTVLDLKD  
AKR\_MLV\_MLOGC\_RT -----KRVQDIHPVVPNPYNLLSS--LPPSYTWYSVLDLKD  
GaLV\_pol -----QATVTLHPTVVPNPYTLSG--LLPAEDCWFTCLDLKD  
Chr3\_158587414\_1662\_po\_C\_Ez10/ -----QATVTLHPTVVPNPYTLG--LL-----  
Chr3\_79627623\_1138\_po\_C\_Ez4/7 -----QATVTLHPTVVPNPYTLG--LLPAEDIWFTHLDLKD  
Chr19\_20477244\_1350\_po\_C\_Ez10/ -----QATVTLHPTVVPNPYTLG--LLLAEDSCFTCLDLKD  
Chr5\_111890459\_1626\_po\_C\_Ez10/ -----QATVTLHPTVVPNPYTLG--LLQAEDSWFTCLDLKD  
ChrX\_48766518\_1600\_po\_C\_Ez6/3 -----QATVTLHPTVVPNPYTLG--LLPAEDSWFTCLDLKD  
ChrX\_152580713\_1572\_po\_C\_Ez10/ -----QATVTLHPTVVPNPYTLG--LLPAEDSWFTCLDLKD  
ChrX\_139287533\_1154\_po\_C\_Xz8/4 -----QATVTLHPTVVPNPYTLG--LLPAEDSWFTCLDLKD  
Chr2\_52615786\_912\_po\_C\_Xz11/5 -----QPTVTLHPTVVPNPYTLG--LLPAEDSWFTCLDLKD  
HERV-E\_4\_1 -----QATVTLHPTVVPNPYTLG--LLPAEDSWFTCLDLKD  
ChrY\_21962399\_1137\_po\_C\_Xz13/9 -----QATVTLHMPVNPYTLLE--FLPAEDNLFSTLDLKD  
ChrY\_8634032\_950\_po\_C\_Xz14/10 -----QATVTLHPTVVPNPYTLG--LLLAEDSWFTCLDLKD  
Chr3\_126735360\_997\_po\_C\_Xz5/10 -----QATLTLHPTVVPNPSTLLV--LPPAEDSWFTFWNLKD  
Chr3\_126713203\_958\_po\_C\_Xz7/8 -----QATLTLHPTVVPNPSTLLG--LLPAEDSWFTCLDLKD  
Chr3\_75226118\_977\_po\_C\_Xz8/9 -----QATLTLHPTVVPNPSTLLG--LPPAENSWFTCLDLKD  
Chr7\_6629919\_827\_po\_C\_Xz8/7 -----QATLTFHPTVVPNPSTLLG--LLPAEDSWFTFLDLKD  
Chr4\_9166812\_811\_po\_C\_Xz8/10 -----QATLTFHPTVVPNPSTLLG--LLPAEDSWFSCLDLKD  
Chr12\_8478642\_834\_po\_C\_Xz12/7 -----QATLTFHPTVVPNPSTLLG--LPPAEDSWFTCLDLKD  
Chr10\_15187175\_787\_po\_C\_Xz11/5 -----QATLTFHPTVVPNPSTLLG--LPPAEDSWFTCLDLKD  
Chr11\_71819740\_854\_po\_C\_Xz11/9 -----QAKLTFHPTVVPNPSTLLG--FPPAEDSWFTCLDLKD  
Chr11\_71519974\_886\_po\_C\_Xz13/9 -----QATLTFHPTVVPNPSTLLG--LPPAEDSWFTCLDLKD  
Chr8\_7271441\_969\_po\_C\_Xz10/6 -----QATLTLHPTVVPNPSTLLG--LPPAEDSWFTCLDLKD  
Chr8\_11770066\_826\_po\_C\_Xz9/8 -----QATLTLHPTVVPNPSTLLG--FLPAEDSWFTCLDLKD  
Chr4\_4128362\_651\_po\_C\_Xz7/11 -----LATLTFHPTVVPNPSTLVG--LLPAEDSWFTCLDLRD  
Chr14\_50203955\_850\_po\_C\_Xz10/8 -----QATLTFHPTVVPNPSTLLG--LLPAEDSWFTCLDLKD  
Chr14\_50205291\_837\_po\_C\_Xz10/8 -----QATLTFHPTVVPNPSTLLG--LLPAEDSWFTCLDLKD  
Chr7\_6597120\_842\_po\_C\_Xz7/7 -----QATLTFHPTVVPNPSTLLG--LLPAEDSWFTCLDLRD  
Chr11\_71544658\_783\_po\_C\_Xz8/13 -----VKLTFHPTVVPNPSTLLG--LLPAEDGWFTCLDLRD  
Chr11\_67999520\_760\_po\_C\_Xz8/8 -----QATLTLHPTVVPNPSTLLG--LLPAEDSWFTCLDLRD  
Chr3\_75461975\_796\_po\_C\_Xz7/9 -----QATLTLHPVVPNPSTLLG--LLPAEDSWFTCLDLKD  
Chr12\_52228939\_692\_po\_C\_Xz3/10 -----QATVTLHPTVVPNPYTLG--LLPAEDSWFTCLDLKD  
Chr10\_15211234\_286\_po\_C\_Xz11/1 -----CPVINLEQFIGNTVQIIC--PY-----ILFSLDSCQ  
Chr12\_100973302\_945\_po\_C\_Xz12/ -----QAAVTRHPTVVPNPYTLG--LLPAEDSWFTCLDLKD  
Chr19\_9685420\_817\_po\_C\_Xz6/10 -----QASDS-APTVPNPYTLLE--LLPAEDSWFTCLDLKD  
Chr13\_40936820\_719\_po\_C\_Xz9/10 -----QATLTFHPTVVPNPSTLLG--LLPAEDSWFTCLDLKD  
Chr7\_63858202\_1754\_po\_C\_Rz12/9 -----QATVT IHPVVPNPYTLMGL--ILASATWFTVLDLKD  
ERV3\_chr7q21\_AC073210\_polputei -----QATVT IHPVVPNPYTLMGL--ILASATWFTVLDLKD  
Chr6\_110218096\_843\_po\_C\_Xz16/8 VQDZMNECRVQDLQSTVT IHPMVPNPYTLMGL--IPASAAWFTCLDLKD  
Chr6\_110214535\_786\_po\_C\_Xz16/8 VQDZMNECRVQDLQSTVT IHPMVPNPYTLMGL--IPASAAWFTCLDLKD  
ChrY\_3018841\_881\_po\_C\_Rz9/12 -----QATVT IHPVVPNPYTLMGL--IPANA WFTCLDLKD  
ChrX\_86876098\_639\_po\_C\_Xz7/8 -----QATVT IHPVVPNPYILMGL--IPANA WFTCLDLKD  
Chr14\_6889917\_965\_po\_C\_Xz6/8 -----QTTVT IPPVVPNPYTLMGL--IAASAAWFTCLDLKD  
ChrY\_23874437\_661\_po\_C\_Xz15/9 -----QATVTFHLVVPNPYMLIRF--ILASAAZFTZLDLKN  
ChrY\_27518418\_649\_po\_C\_Xz15/9 -----QATVTFHLVVPNPYMLIRF--ILASAAZFTZLDLKN  
ChrY\_25016892\_657\_po\_C\_Xz13/12 -----QATVTFHLVVPNPYMLIRF--ILASAAZFTZLDLKN  
ChrY\_19932937\_520\_po\_C\_Xz10/14 -----QATVT IHLVVPNPYTLIGL--ILASAAZFTSLDLKN  
ChrY\_20104614\_518\_po\_C\_Xz10/14 -----QATVT IHLVVPNPYTLIGL--ILASAAZFTSLDLKN  
Chr19\_58660155\_598\_po\_C\_Xz21/1 -----QATVT IHPVVPNPYTVITP--ASATZ--FTVLDLKD

Chr19\_58621153\_500\_po\_C\_Xz21/1 -----QATVTIHPVVPNPYTLIAL--IPASA--STVLDLKD  
Chr7\_139686987\_710\_po\_C\_Xz11/7 -----WATVTIHPVVPNLYNLMEL--ISASATWFTVZDLKD  
Chr7\_137651301\_1097\_po\_C\_Pz13/ -----TTVNIHPVVPNPYTLMLG--IPASAAWFTVLDLKD  
Chr11\_29579197\_930\_po\_C\_Pz8/12 -----ATVTIHPVVPNPYSLTGL--ISASAVWFAFLDLKD  
Chr4\_117329205\_488\_po\_C\_Xz3/16 -----TIGHVFKVVTGVGGQPGH--PDQFPYIDSWLNIQV  
Chr21\_38522185\_383\_po\_C\_Xz7/9 -----TIGHVFKVVTGLGGQPGH--PDQFPYIDSWLHIVQ  
Chr4\_70173370\_1049\_po\_C\_Xz11/8 -----ATVTIHPVVPNPYTLMGH--IPASATZFTVLDLKD  
Chr4\_70022513\_788\_po\_C\_Kz10/12 -----ATVTIHPVVSNLHTLMGH--IPASATZFTVLDLKN  
Chr14\_105225894\_1027\_po\_C\_Xz13 -----ATVTIHPVLPNLYTLMGH--IPVSATWFTVLDLKD  
Chr7\_119241536\_761\_po\_C\_Xz11/1 -----RTVTIYPVVPNSYTLMGF--IPASATWFTVLDLKD  
ChrY\_22564970\_567\_po\_C\_Xz9/10 -----QVTETIYPVVPNPYTLGQ--IPASAAWFTVLDLKD  
Chr21\_14409346\_1477\_po\_C\_Pz5/6 -----EVTATLHAIVPNLYAMLAQ--IPASAAWFTCLHIKD  
ChrX\_51259700\_1396\_po\_C\_Pz7/8 -----KVAATQHAVVLNPNYTLGQ--MPASAAWFTCLDIKD  
Chr6\_64985396\_1041\_po\_C\_Xz11/1 -----KVAATLYAIVSNPNYTLGR--IPADGAWFTCLYIKD  
ChrY\_20355209\_659\_po\_C\_Xz7/11 -----KVAATLYAIVPNPYTLMGZ--IPADVAWFTCLDLK-D  
Chr3\_34567166\_523\_po\_C\_Xz8/6 -----KVAATLYAIVPNPYTLMGQ--IPADAAGFMCLYIKD  
Chr3\_122072468\_245\_po\_C\_Xz9/9 -----KVAATLYAIVPNPYTLMGZ--IPVDAAWFTCLDIKD  
Chr11\_58788475\_541\_po\_C\_Xz8/22 -----EKPQALIDLMSIFLTHNPTWADCKELLSLFNTEE  
Chr6\_137421042\_373\_po\_C\_Xz6/9 -----EKPQALIDLMSIFLTHNPTWVDCKHFFLSLFNTEE  
Chr4\_115910608\_550\_po\_C\_Pz8/12 -----DT--QLTKVATKVYINR----DQEAKKEANWKLKE  
ChrY\_13743185\_977\_po\_C\_Xz14/8 -----KATVTIYAIVPNPYTLMGQ--IPAEAMWFMCLDLKD  
HERV15 -----KATVTIYAIVPNPYTLMGQ--IPAG-HVVHVLDLKD  
ChrX\_117198092\_983\_po\_C\_Xz8/8 -----KATVAIHATVPNPYTLMGQ--IPADATWFTCLDLKD  
Chr19\_21166030\_1412\_po\_C\_Xz9/1 -----KTTATIHATVPNPYTLMLZH--IPAEAAGFTCLDLKD  
Chr19\_21213743\_913\_po\_C\_Xz14/1 -----KAAVTIHAIVPNPYTLMGQ--IHADATWFMCLDLKD  
Chr19\_15957774\_569\_po\_C\_Xz8/10 -----RATVAIHLVVPNLYTLMLG--IPASCTWFTVLDLKD  
Chr11\_77508681\_297\_po\_C\_Xz19/1 -----RAMVTIHPVAPNPYTLMLV--IPTSATWFTVLDLKD  
Chr13\_98250769\_738\_po\_C\_Xz7/13 -----RAMVTIHPVVPNPYTLIGL--IPASATWFTVLDLKD  
Chr6\_39968183\_513\_po\_C\_Pz10/9 -----RVMETIHPVVPNPYTLMGQ--IPASAAWFLCLDLKN  
Chr15\_66867263\_645\_po\_C\_Xz11/1 -----QAKVTMHPVVPNLYSLMGH--ILASAAWFTVLDLKD  
HERV18\_polputein -----KVTPLHAAPVPSIMDLMDR--LTTELQYHYVVDLAN  
HERVIP10FH\_polputein -----RDVLEVKKGEKSPLRGAES--QKEVRNPHGGGLPQKE  
MER66\_polputein -----KKXSSNLEVIKREVQNIIRNX---XVEKRDIKNVMDRK

HERVI\_polputein AFWACP-WLE-SRDTFAFEWEDPQLGZKQWYQ-----WT  
HERVIP10F\_polputein AFWACP-LAEDSRDIFAFEWEDPHSGRKQOYR-----WT  
HERVadp\_AC005741 VFWACP-LDFRSRDLFAFEWENPITGRKQZYC-----WT  
HERV-PT47D VDFACP-LAKDSQDIFAFERRSP-LRAETTIS-----MD  
HERV\_W\_chr6\_141432567\_ERV9\_lik A-FFYIPLYSDSQFLFTFE---DPTDHTSQLT-----WM  
ERV9\_PH1\_RT A-FFCVPLHSDSQFLFAFE---DPTNHTSQLT-----WM  
Chr13\_54564403\_572\_po\_C\_Yz7/14 A-FFCIPVHPDSQFLFAFE---DPK-PNVQLT-----WT  
HERV\_Y\_chr12\_51022911\_pol A-FFCIPVHPDSQFLFAFR---DPSNLTSQLP-----WT  
HERV17\_polputein A-FFCI-LHPDSQFLFAFE---DPSNPTSQTL-----WT  
HERV\_W\_chr7\_9105739\_syncytin\_p A-FFCIPVHPDSQFLFAFE---DTSNPTSQTL-----WT  
HERV9\_polputein C-LLLPLHSDSQFLFAFE---DPTDHTSQLT-----WM  
HUERS-P3\_polputein A-FFCIPVHPDSQYPPFAFK---DPSGQTAQLT-----WT  
ERVfrd\_AC004022 --FFCIPVHPDSQYPPFAFK---DPSGQTAQLT-----WT  
PRIMA41\_polputein FFFFCIZVYVPSKFIKIFAGWTDPSHLSVSQLT-----WM  
HERV\_H\_RGH1\_pol -----  
HERVHRGH2\_pol A-FFTIPVHPSTQPLFVFTWTDPDTHQSQQLT-----WA  
HERV\_H48I\_polputein A-FFSIPVHPDSQNLFAFTWENPDTHLSRQLT-----WC  
HERV\_H\_RTVLH2\_pol A-FFTIPVHPSSQRLFAFTR-LTLTPIRLQIT-----WA  
HERVHFH21\_pol A-FFTIPVHPDSQNLFAFTRTPDTPDLQSQQLT-----WT  
HERVRblike\_chr4\_109047953 A-FFCIPVEIESQLLFAFEWTDPEAAQFYC-----WT  
ChrY\_13790029\_693\_po\_C\_Xz12/11 AFFAIP-LAPKSQPIFAFEWTDPGSGNTTQLT-----WT  
HERVS71\_polputein AFFAIP-LAPKSQPIFAFEWMDPGSGDITQLT-----WT  
BaEV\_M7\_pol AFFCLP-LAPQSQELFAFEWKDPERGISGQLT-----WT  
HERVR\_polputein AFFCLP-LAPQSQELFAFEWKDPERGISGQLT-----WT  
AKR\_MLV\_MLOCG\_RT AFFCLR-LHPTSQPLFAFEWRDPEMGISGQLT-----WT  
GaLV\_pol AFFCLR-LHPNSQPLFAFEWKDPEKGNIGQLT-----WT  
Chr3\_158587414\_1662\_po\_C\_Ez10/ AFFSIR-LAPDSQKLFQWEDPESGVTTYT-----WT  
Chr3\_79627623\_1138\_po\_C\_Ez4/7 -----LAPESQKLFQWEDPESGVTTYT-----WT  
Chr19\_20477244\_1350\_po\_C\_Ez10/ AIC SIR-IAPESQKLFQWEDPESGVTTYT-----WN  
Chr5\_111890459\_1626\_po\_C\_Ez10/ AIFSIR-ISPESQKLFQWEDPESGVTTYT-----WT  
ChrX\_48766518\_1600\_po\_C\_Ez6/3 AFFSIR-LAPESQKLFQWEDPESGVTTYT-----WT  
ChrX\_152580713\_1572\_po\_C\_Ez10/ AIFSIR-IAPESQKLFQWEDPESGVTTYT-----WT  
ChrX\_139287533\_1154\_po\_C\_Xz8/4 AFFSIR-LAPESQKLFQWEDPESGVTTYT-----WT  
Chr2\_52615786\_912\_po\_C\_Xz11/5 AFFSIR-LAPESQKLFQWEDLGSGVTTYT-----WT  
HERV-E\_4\_1 AFFSIR-LAPERQKLFQWEDPESGVTTYT-----WT  
ChrY\_21962399\_1137\_po\_C\_Xz13/9 AFFSIR-LAPEGPKLFQWEDPESGVTTYT-----WT  
ChrY\_8634032\_950\_po\_C\_Xz14/10 VFFSIR-LDPESQNLFAFQZYLEAGVITTYT-----WT  
Chr3\_126735360\_997\_po\_C\_Xz5/10 AFFPIR-LAPERQKLFQWEDPESGVTTYT-----WT  
Chr3\_126713203\_958\_po\_C\_Xz7/8 AFFPIR-LAPERQKLFQWEDPESGVTTYT-----WT  
Chr3\_75226118\_977\_po\_C\_Xz8/9 AFFPIR-LAPERQKLFQWEDPESGVTTYT-----WT  
Chr7\_6629919\_827\_po\_C\_Xz8/7 AFFPIR-LAPESQKLFQWEDPESGVTTYT-----WT  
Chr4\_9166812\_811\_po\_C\_Xz8/10 AFFPIR-LTPERKLFQWEDPESGVTTYT-----WT

Chr12\_8478642\_834\_po\_C\_Xz12/7 AFFPPIR-LAPERQKLFQWADPESGVTTQYT-----WT  
 Chr10\_15187175\_787\_po\_C\_Xz11/5 VFFAIR-LAPERQKLFQWADPESGVTTQYT-----WT  
 Chr11\_71819740\_854\_po\_C\_Xz11/9 AFFPPIR-LAPERQKLFQWEDPESGVTTQYT-----WT  
 Chr11\_71519974\_886\_po\_C\_Xz13/9 AFFPPIR-LAPERQKLFQWEDPESGVTTQYT-----WT  
 Chr8\_7271441\_969\_po\_C\_Xz10/6 AFLPIR-LAPERQKLFQWEDPESGVTTQYT-----WT  
 Chr8\_11770066\_826\_po\_C\_Xz9/8 AFFPPIR-LAPERQKLFQWEDPESGVTTQYT-----WT  
 Chr4\_4128362\_651\_po\_C\_Xz7/11 AFFPPIR-LAPERQKLFQWEDPESGVTTQYT-----WT  
 Chr14\_50203955\_850\_po\_C\_Xz10/8 AFFPPIR-SAPESQKLFQWEDPESGVTTQYT-----WT  
 Chr14\_50205291\_837\_po\_C\_Xz10/8 AFFPPIR-SAPESQKLFQWEDPESGVTTQYT-----WT  
 Chr7\_6597120\_842\_po\_C\_Xz7/7 AFFPPIR-LAPESQKLFQWEDPESGVTTQYT-----WT  
 Chr11\_71544658\_783\_po\_C\_Xz8/13 AFFPPIR-LP-EIQKLFQWEDPESGVTTQYT-----WT  
 Chr11\_67999520\_760\_po\_C\_Xz8/8 AFFSIR-LAPERQKLFQWEDPESGVTTQYT-----WT  
 Chr3\_75461975\_796\_po\_C\_Xz7/9 AFFPPIR-LAPERQKLFQWEDPESGVTTQYT-----WT  
 Chr12\_52228939\_692\_po\_C\_Xz3/10 AFFRIR-LAPESQKLFQWEDPESGITTTQYT-----WT  
 Chr10\_15211234\_286\_po\_C\_Xz11/1 KLDMFR-NMPEILLHLLTDRN-----TQIHA-----WW  
 Chr12\_100973302\_945\_po\_C\_Xz12/ AFFSNR-IAPESQKLYAFQWEDPESGITTTQYT-----WT  
 Chr19\_9685420\_817\_po\_C\_Xz6/10 TFFSIR-LAPESQKLFQWEDLGSVTTQYT-----WT  
 Chr13\_40936820\_719\_po\_C\_Xz9/10 AFFPPIR-LAPERQKLFQWEDPESGVTTQYT-----WT  
 Chr7\_63858202\_1754\_po\_C\_Xz12/9 AFFFLY-LAPVSQPIFAFZWDNSVVTGTG-----GQLAWT  
 ERV3\_chr7q21\_AC073210\_polputei AFFCLY-LAPVSQPIFAFZWDNSVVTGTG-----GQLAWT  
 Chr6\_110218096\_843\_po\_C\_Xz16/8 AFFCLH-LPPISQPIFAFQWEDPVTGTG-----EQLTWT  
 Chr6\_110214535\_786\_po\_C\_Xz16/8 AFFCLH-LPPISQPIFAFQWEDPVTGTG-----EQLTWT  
 ChrY\_3018841\_881\_po\_C\_Rz9/12 AFLFPC-VAPSSQPIFAFQZDSDSVVTGTG-----EQLTWT  
 ChrX\_86876098\_639\_po\_C\_Xz7/8 AFLFPC-LAPSSQPIFAFQZDSDSVVTGTG-----EQLTWT  
 Chr14\_68899917\_965\_po\_C\_Xz6/8 GFFCLC-LAPSSQPLFAFQWDDSVVTGTG-----EQLTWT  
 ChrY\_23874437\_661\_po\_C\_Xz15/9 IFFYLC-LAPISQPIFAFQWDDZVTGTG-----EQLTWT  
 ChrY\_27518418\_649\_po\_C\_Xz15/9 IFFYLC-LAPISQPIFAFQWDDZVTGTG-----EQLTWT  
 ChrY\_25016892\_657\_po\_C\_Xz13/12 IFFYLC-LAPISQPIFAFQWDDZVTGTG-----EQLTWT  
 ChrY\_19932937\_520\_po\_C\_Xz10/14 IFFCLH-LAPVSQPIFAFQWDDSVVTGMG-----EELTWA  
 ChrY\_20104614\_518\_po\_C\_Xz10/14 IFFCLH-LAPVSQPIFAFQWDDSVVTGMG-----EELTWA  
 Chr19\_58660155\_598\_po\_C\_Xz21/1 AFFYIC-LAPVSQPIFAFHKN-EASQFT-----WT  
 Chr19\_58621153\_500\_po\_C\_Xz21/1 AFFLLLSLAPVSQPIFAFHKRKEASQSPGLDSHKGLKTTTIWGPVPPPIG  
 Chr7\_139686987\_710\_po\_C\_Xz11/7 AFLHIC-MVPVSQPIFAFQWDKEATQLT-----WT  
 Chr7\_137651301\_1097\_po\_C\_Pz13/ AFFCLH-LHQLAH-FESRKWGESQFT-----WT  
 Chr11\_29579197\_930\_po\_C\_Pz8/12 AFFCLR-LAPISP-FAFQ-WSELQFT-----WT  
 Chr4\_117329205\_488\_po\_C\_Xz3/16 PNLCHC-SPAWQL-IAKRSWFKLSL-----VK  
 Chr21\_38522185\_383\_po\_C\_Xz7/9 NZPAWL-QLCLTA-YGKTLVAQAKLK-----VK  
 Chr4\_70173370\_1049\_po\_C\_Xz11/8 TFFRLW-LAPINEPFAFQWGKSQYT-----WT  
 Chr4\_70022513\_788\_po\_C\_Kz10/12 AFFCLQ-FAPISQASVFFQWGKSQYT-----WT  
 Chr14\_105225894\_1027\_po\_C\_Xz13 TFFCLQ-LAPISQPVFALQWGESQYT-----ZT  
 Chr7\_119241536\_761\_po\_C\_Xz11/1 AFFCLH-LAPVSP--LFISLGDQSQFT-----ZT  
 ChrY\_22564970\_567\_po\_C\_Xz9/10 AFFCLQ-LVPVSZPIFAFHWGTEQYT-----WT  
 Chr21\_14409346\_1477\_po\_C\_Pz5/6 AFFCIQ-LAPVSRDIFAFDW-PSQYT-----WT  
 ChrX\_51259700\_1396\_po\_C\_Pz7/8 AFFCIQ-LAPMSZDIFAFWGPQQYT-----WT  
 Chr6\_64985396\_1041\_po\_C\_Xz11/1 AFFCIQ-LAPES--IFAFEWGLSQYT-----WT  
 ChrY\_20355209\_659\_po\_C\_Xz7/11 AFFCIQ-LAPESQGIFAFEWSSSQYT-----WT  
 Chr3\_34567166\_523\_po\_C\_Xz8/6 ALFCIZ-LALESQGIFAFEWSITVY-----LD  
 Chr3\_122072468\_245\_po\_C\_Xz9/9 AFFCIQ-LAPESQGIFFVFEWSSSQYT-----WT  
 Chr11\_58788475\_541\_po\_C\_Xz8/22 HHRVIQ-AALQWLEDNEPAGTGDIRH-----YA  
 Chr6\_137421042\_373\_po\_C\_Xz6/9 HRRVIQ-AALQWLEKNASSSTGDIRQ-----YT  
 Chr4\_115910608\_550\_po\_C\_Pz8/12 RQIYZQ-QPSREGKLTLLQGGVGAVMK-----EA  
 ChrY\_13743185\_977\_po\_C\_Xz14/8 -FLCLR-LAPQSQPIFAFQWGLZYT-----WT  
 HERV15 -FLCLR-LAPQSQPIFAFQWGLZYT-----WT  
 ChrX\_117198092\_983\_po\_C\_Xz8/8 AFFCLK-LAPQSQ-----RQQSQYT-----WT  
 Chr19\_21166030\_1412\_po\_C\_Xz9/1 AFFCLR-LVPQSQPIFAFQWQGSQYT-----RR  
 Chr19\_21213743\_913\_po\_C\_Xz14/1 AFFCLR-LAPQSQPVFAIQWQGSQYT-----WT  
 Chr19\_15957774\_569\_po\_C\_Xz8/10 AFFCIZ-LAPVSQPIFAFQZDKEATQLT-----WT  
 Chr11\_77508681\_297\_po\_C\_Xz19/1 AFFYIR-LARVSP--FAFQWDKEAMQLM-----WT  
 Chr13\_98250769\_738\_po\_C\_Xz7/13 TFFCIC-LAPVSQPIFAFNRTKKLTQLT-----WT  
 Chr6\_39968183\_513\_po\_C\_Pz10/9 TFFCLQ-LAPISQPIFAFHWD--ETQHT-----WT  
 Chr15\_66867263\_645\_po\_C\_Xz11/1 AFFCLW-LAPISQPIFAFQZG--ESQYI-----WT  
 HERV18\_polputein AFFSLT--LPESQEQFAFTWEGRQWT-----FT  
 HERVIP10FH\_polputein VRNPHGGRGVPEPQKEVRNPHGGGZTSKRGEKS-----PWR  
 MER66\_polputein C1FCKEYIKKSNFXRGIYLSKFLSZ-----SKMT

HERVI\_polputein VLPQG-----FMDSPNLFQGIIL--  
 HERVIP10F\_polputein VLPQG-----FTDSPNLFQGIIL--  
 HERVadp\_AC005741 VLPQG-----FK-----FVQIIL--  
 HERV-PT47D SLAQG-----FTDSPNIFGEIIL--  
 HERV\_W\_chr6\_141432567\_ERV9\_lik ALP-G-----FRDPAHLFDQ---  
 ERV9\_PH1\_RT VLPQG-----FRDSPHLFGQ---  
 Chr13\_54564403\_572\_po\_C\_Yz7/14 VLQ-G-----FKDSPHLFDQ---  
 HERV\_Y\_chr12\_51022911\_pol VLPQE-----FRDSPHLFGQ---  
 HERV17\_polputein VLPQG-----FRDSPHLFGQ---  
 HERV\_W\_chr7\_9105739\_syncytin\_p ILPQG-----FRDSPHLFGQ---  
 HERV9\_polputein VLPQG-----FRDSPHLFGQ---

|                                |                                                     |
|--------------------------------|-----------------------------------------------------|
| HUERS-P3_polputein             | VLPQG-----FZDSPHLFGQ----                            |
| ERVfrd_AC004022                | VLPQG-----FRDSPHLFGQ----                            |
| PRIMA41_polputein              | VFPQE-----CRDSPHLFGN----                            |
| HERV_H_RGH1_pol                | -----                                               |
| HERVHRGH2_pol                  | VMLQG-----FRGSPYYFSQ----                            |
| HERV_H48I_polputein            | VLPQG-----FRDSPHLFGQ----                            |
| HERV_H_RTVLH2_pol              | VLPQG-----FTDRPHYFS-----                            |
| HERVVFH21_pol                  | VLPQG-----FQDSSLFFGQ----                            |
| HERVRblike_chr4_109047953      | VLPQG-----FKNSPSIFGE----                            |
| ChrY_13790029_693_po_C_Xz12/11 | QLPQG-----FKNSPTLFFK----                            |
| HERVS71_polputein              | WLPQG-----LKNSTPLFG-----                            |
| BaEV_M7_pol                    | RLPQG-----FKNSPTLFD-----                            |
| HERVR_polputein                | RLPQG-----FKNSPTLFD-----                            |
| AKR_MLV_MLOCG_RT               | RLPQG-----FKNSPTLFD-----                            |
| GaLV_pol                       | RLPQG-----FKNSPTLFD-----                            |
| Chr3_158587414_1662_po_C_Ez10/ | WLPQG-----FKNSPTIFR-----                            |
| Chr3_79627623_1138_po_C_Ez4/7  | RLPQG-----FKNSPTIFG-----                            |
| Chr19_20477244_1350_po_C_Ez10/ | WLPQG-----FKNSLTIFG-----                            |
| Chr5_111890459_1626_po_C_Ez10/ | QLTQG-----FENSPTIFG-----                            |
| ChrX_48766518_1600_po_C_Ez6/3  | QLPQG-----FKNSLTIFG-----                            |
| ChrX_152580713_1572_po_C_Ez10/ | WLPQG-----FKISPTIFG-----                            |
| ChrX_139287533_1154_po_C_Xz8/4 | WLPQG-----FKNSPIIFGE-----                           |
| Chr2_52615786_912_po_C_Xz11/5  | WLPQG-----FKNSPTIFG-----                            |
| HERV-E_4_1                     | QLPQR-----FKNSPTIFG-----                            |
| ChrY_21962399_1137_po_C_Xz13/9 | RLPQG-----FKYSPTIFG-----                            |
| ChrY_8634032_950_po_C_Xz14/10  | LLPQG-----FKNSTTIFG-----                            |
| Chr3_126735360_997_po_C_Xz5/10 | GLPQG-----FKNSPTIFR-----                            |
| Chr3_126713203_958_po_C_Xz7/8  | GLPQG-----FKNSPTIFG-----                            |
| Chr3_75226118_977_po_C_Xz8/9   | GLPQG-----FKNFPTIFG-----                            |
| Chr7_6629919_827_po_C_Xz8/7    | GLPQG-----FKNSPTIFG-----                            |
| Chr4_9166812_811_po_C_Xz8/10   | GLPKG-----FKNSPTIFG-----                            |
| Chr12_8478642_834_po_C_Xz12/7  | GLPQG-----FKNSPTIFR-----                            |
| Chr10_15187175_787_po_C_Xz11/5 | GLPHE-----FKNFPTILG-----                            |
| Chr11_71819740_854_po_C_Xz11/9 | GLPQG-----VKNSPTIFG-----                            |
| Chr11_71519974_886_po_C_Xz13/9 | RLPQG-----FKNSPTIFG-----                            |
| Chr8_7271441_969_po_C_Xz10/6   | GLPQR-----FKNSPTIFG-----                            |
| Chr8_11770066_826_po_C_Xz9/8   | RLPQG-----FKNSPTIFG-----                            |
| Chr4_4128362_651_po_C_Xz7/11   | GLPQG-----FKNSPTIFG-----                            |
| Chr14_50203955_850_po_C_Xz10/8 | GLPQE-----FKNSPTTFG-----                            |
| Chr14_50205291_837_po_C_Xz10/8 | GLPQE-----FKNSPTTFG-----                            |
| Chr7_6597120_842_po_C_Xz7/7    | GLPQG-----FKNSPTIFG-----                            |
| Chr11_71544658_783_po_C_Xz8/13 | GLPQG-----FKDSPTIFG-----                            |
| Chr11_67999520_760_po_C_Xz8/8  | GLPQG-----FKNSPTIFG-----                            |
| Chr3_75461975_796_po_C_Xz7/9   | GLPQG-----FKNSPTIFG-----                            |
| Chr12_52228939_692_po_C_Xz3/10 | RLPQG-----FQSSPTIFR-----                            |
| Chr10_15211234_286_po_C_Xz11/1 | HPKVH-----VZ-----                                   |
| Chr12_100973302_945_po_C_Xz12/ | RLPQG-----FKNSPTIFR-----                            |
| Chr19_9685420_817_po_C_Xz6/10  | WLPQG-----FKNSPTIFR-----                            |
| Chr13_40936820_719_po_C_Xz9/10 | GLPQG-----FKNSPTIFG-----                            |
| Chr7_63858202_1754_po_C_Rz12/9 | SLPQG-----FKNSPTIFG-----                            |
| ERV3_chr7q21_AC073210_polputei | SLPQG-----FKNSPTIFG-----                            |
| Chr6_110218096_843_po_C_Xz16/8 | RLPQG-----ZKNSPTIFA-----                            |
| Chr6_110214535_786_po_C_Xz16/8 | RLPQG-----ZKNSPTIFA-----                            |
| ChrY_3018841_881_po_C_Rz9/12   | RLPQG-----FKKSPTIFG-----                            |
| ChrX_86876098_639_po_C_Xz7/8   | RLPQG-----FKKSPTILG-----                            |
| Chr14_68899917_965_po_C_Xz6/8  | KLPQG-----FKNSPTIFE-----                            |
| ChrY_23874437_661_po_C_Xz15/9  | RLPQR-----FKNTPTIFG-----                            |
| ChrY_27518418_649_po_C_Xz15/9  | RLPQR-----FKNTPTIFG-----                            |
| ChrY_25016892_657_po_C_Xz13/12 | RLPQR-----FKNTPTIFG-----                            |
| ChrY_19932937_520_po_C_Xz10/14 | RLPQ-----FG-----                                    |
| ChrY_20104614_518_po_C_Xz10/14 | RLPQ-----FG-----                                    |
| Chr19_58660155_598_po_C_Xz21/1 | RLPQR-----FKNSPTLSHNLQFS                            |
| Chr19_58621153_500_po_C_Xz21/1 | RLRQENGVNQGGGRAYSEPRPQCTPLGDRARLHLKNNNNNNKNNYHNLPQF |
| Chr7_139686987_710_po_C_Xz11/7 | RFLQG-----FKNFPTIFG-----                            |
| Chr7_137651301_1097_po_C_Pz13/ | RLPQG-----FKKSPTIFN-----                            |
| Chr11_29579197_930_po_C_Pz8/12 | RLPQA-----LKNSLTIFEE-----                           |
| Chr4_117329205_488_po_C_Xz3/16 | EKSAL-----LSATKTKGK-----                            |
| Chr21_38522185_383_po_C_Xz7/9  | EKSAS-----LSATKTKGK-----                            |
| Chr4_70173370_1049_po_C_Xz11/8 | RLPQG-----FKNSPTIFEE-----                           |
| Chr4_70022513_788_po_C_Kz10/12 | RFPQG-----FKNSTTIFEE-----                           |
| Chr14_105225894_1027_po_C_Xz13 | RLPQG-----FK-SPTIFEE-----                           |
| Chr7_119241536_761_po_C_Xz11/1 | RLPRG-----FKNSLTIFEE-----                           |
| ChrY_22564970_567_po_C_Xz9/10  | RLPRG-----FKNSPTIFG-----                            |
| Chr21_14409346_1477_po_C_Pz5/6 | RLPQG-----FKNSPT-----IF                             |
| ChrX_51259700_1396_po_C_Pz7/8  | RLPQG-----FKNSP-----IF                              |
| Chr6_64985396_1041_po_C_Xz11/1 | RLHQG-----LKNSP-----TIF                             |
| ChrY_20355209_659_po_C_Xz7/11  | KLPQG-----FKNSP-----TIF                             |

Chr3\_34567166\_523\_po\_C\_Xz8/6  
Chr3\_122072468\_245\_po\_C\_Xz9/9  
Chr11\_58788475\_541\_po\_C\_Xz8/22  
Chr6\_137421042\_373\_po\_C\_Xz6/9  
Chr4\_115910608\_550\_po\_C\_Pz8/12  
ChrY\_13743185\_977\_po\_C\_Xz14/8  
HERV15  
ChrX\_117198092\_983\_po\_C\_Xz8/8  
Chr19\_21166030\_1412\_po\_C\_Xz9/1  
Chr19\_21213743\_913\_po\_C\_Xz14/1  
Chr19\_15957774\_569\_po\_C\_Xz8/10  
Chr11\_77508681\_297\_po\_C\_Xz19/1  
Chr13\_98250769\_738\_po\_C\_Xz7/13  
Chr6\_39968183\_513\_po\_C\_Pz10/9  
Chr15\_66867263\_645\_po\_C\_Xz11/1  
HERV18\_polputein  
HERVIP10FH\_polputein  
MER66\_polputein

QASQG-----FKCSP-----TIF  
RLPQG-----FKNPP-----IIF  
QQALP-----IENAPG-----WDLN  
QQALL-----IRLTQA-----GTLT  
SLDRD-----LRAGQG-----ZKKI  
RLPQG-----FKNSP-----IIF  
RLPQG-----FKNSP-----IIF  
RLPZG-----FKNS-----TIF  
RLPQG-----FKNSP-----TIF  
RLPQG-----FENS-----TIF  
KLPQG-----FKNSLTIFE-----  
RLPQG-----FKNSPTIFG-----  
RVPKR-----FKNSPTIFK-----  
RLPQG-----FKNSPMIFE-----  
RLPQG-----FKNSPTIFE-----  
VLPQG-----YMSPTICHG-----  
GLNSH-----  
GYLRKRZ-----YRTSKKXQACCRWS

HERVI\_polputein  
HERVIP10F\_polputein  
HERVadp\_AC005741  
HERV-PT47D  
HERV\_W\_chr6\_141432567\_ERV9\_lik  
ERV9\_PH1\_RT  
Chr13\_54564403\_572\_po\_C\_Yz7/14  
HERV\_Y\_chr12\_51022911\_pol  
HERV17\_polputein  
HERV\_W\_chr7\_9105739\_syncytin\_p  
HERV9\_polputein  
HUERS-P3\_polputein  
ERVfrd\_AC004022  
PRIMA41\_polputein  
HERV\_H\_RGH1\_pol  
HERVHRGH2\_pol  
HERV\_H48I\_polputein  
HERV\_H\_RTVLH2\_pol  
HERVVFH21\_pol  
HERVRblike\_chr4\_109047953  
ChrY\_13790029\_693\_po\_C\_Xz12/11  
HERVS71\_polputein  
BaEV\_M7\_pol  
HERVR\_polputein  
AKR\_MLV\_MLOGC\_RT  
GaLV\_pol  
Chr3\_158587414\_1662\_po\_C\_Ez10/  
Chr3\_79627623\_1138\_po\_C\_Ez4/7  
Chr19\_20477244\_1350\_po\_C\_Ez10/  
Chr5\_111890459\_1626\_po\_C\_Ez10/  
ChrX\_48766518\_1600\_po\_C\_Ez6/3  
ChrX\_152580713\_1572\_po\_C\_Ez10/  
ChrX\_139287533\_1154\_po\_C\_Xz8/4  
Chr2\_52615786\_912\_po\_C\_Xz11/5  
HERV-E\_4\_1  
ChrY\_21962399\_1137\_po\_C\_Xz13/9  
ChrY\_8634032\_950\_po\_C\_Xz14/10  
Chr3\_126735360\_997\_po\_C\_Xz5/10  
Chr3\_126713203\_958\_po\_C\_Xz7/8  
Chr3\_75226118\_977\_po\_C\_Xz8/9  
Chr7\_6629919\_827\_po\_C\_Xz8/7  
Chr4\_9166812\_811\_po\_C\_Xz8/10  
Chr12\_8478642\_834\_po\_C\_Xz12/7  
Chr10\_15187175\_787\_po\_C\_Xz11/5  
Chr11\_71819740\_854\_po\_C\_Xz11/9  
Chr11\_71519974\_886\_po\_C\_Xz13/9  
Chr8\_7271441\_969\_po\_C\_Xz10/6  
Chr8\_11770066\_826\_po\_C\_Xz9/8  
Chr4\_4128362\_651\_po\_C\_Xz7/11  
Chr14\_50203955\_850\_po\_C\_Xz10/8  
Chr14\_50205291\_837\_po\_C\_Xz10/8  
Chr7\_6597120\_842\_po\_C\_Xz7/7  
Chr11\_71544658\_783\_po\_C\_Xz8/13  
Chr11\_67999520\_760\_po\_C\_Xz8/8  
Chr3\_75461975\_796\_po\_C\_Xz7/9  
Chr12\_52228939\_692\_po\_C\_Xz3/10  
Chr10\_15211234\_286\_po\_C\_Xz11/1

-----EQVLDKVSVPKQLCCLLQYVDDILISGEDIEKEAGFSTHIFDHLQ  
-----EQVLEKVVPIEQICLLQYVDDILISGEDIEKVTDFSTHILNHLQ  
-----ENVLEESQTSRGTQLLQYVDDILISGEKRRARVSETTLLNLFGL  
-----EQALEKVFPIEQICLLQYVDDILISGKIDIEKVTNFSTHILNHLQ  
----ALAQDLDLGHFS-SPGTLVLYVDDLLLATSSSEALWQATLGLLNFLA  
----ALAKDLGHFS-SPGTLVLYVDDLLLATSSSEALCQATLDDLNFNLA  
----ALAQDLSQFS-YMDTLVLYVDDLLLATSSSEALCHQATLQALLNFLA  
----ALAQDLSQFS-YLDTLVLRYVDDLLLATRSETVCHQATQELLNFLA  
----ALAQDLSQFS-YLDTLVLRYVDDLLLAARSETLCHQATQALLNFLA  
----ALPR-LEPIL-IPGHLSFG-VDDLLLAHSETLCHQATQALFNFLA  
----ALAQDLDLGHFS-SPGTLVLYVDDLLLATSSSEALCQATLDDLNFNLA  
----ALSKDLSEFS-HPQVKVLYVDDILLCAPTEEASQEGTEALLNFLA  
----ALARYLQDLSLYMGGHLLQYVDDLLICSPTRTELG---IQHLNFLA  
----TLTRELKMLK-LNRGTSIWYVNDLLVASPTKRGSNKNAIKLLNFLD  
-----  
----ALSHDLFLH---PSLLLIQYIGDVLVAPP--ELLNKTHFLQHLF  
----ALARDLCTLS-LKPSTLLQCVNDDLLCSPSQRCNAHTLSLLNFLA  
-----  
----ALAQDLASLD-LSPSRLLYVDDLLCSPSLKNSQTHATLNLFLT  
----ALIQDLRLGQ-LENGVLLQYVDDLLISSTSKQEQENTVKTNLHLA  
-EALQQDLIPFQ-ART-LIVLLQYVDDLLGTETTDSCLOHTKDLFYLLQ  
-EALQQDLIPFZ-ASHPNCTLLQYVDDLLFLATETTDSCLOHTRDLFYLLQ  
-EALHRDLTDFR-TQHPVTLQYVDDLLLAAPTAKKACTQGTRHLLQELG  
-EALHRDLTDFR-TQHPVTLQYVDDLLLAAPTAKKACTQGTRHLLQELG  
-EALHRDLADFR-IQHPDLILQYVDDLLLAATSELDCCQGTTRALLQTLG  
-EALHRDLAPFR-ALNPQVLLQYVDDLLVAAPTYEDCKKGTQKLLQELS  
-EALARDLQKFP-AKHLGCVLLLYVDDLLGHSTAVVCAKGMADLRRHLE  
-EALARDLQKFP-AKDLGCVLLMYVDDLLLGHSMAAGCAKGTDALFRHLQ  
-EALTZDLQKFP-AKDLVYVLLLYVDDLLLGHSMAVGCCKG-DALFQHLE  
-EALARDLQKFP-AKDLGCVLLLYVDDLLGHSTAVVCAKGMADLQHLE  
-EALAZDLQKFP-AKDLG--LLQYVDDLLGHSTAVGCTKGTDALLWHLE  
-EALAZDLQKFP-AKDLGCVLLLYVDDLLLGHSMAVGCCKGTDALLQHLE  
-QALAQDLQKFP-AKDLGCVLLQYVDDLLLGHSMAVGCCKGMVALLRHLE  
-EALAQDLQKFP-TRDLGCVLLQYVDDLLLGHSMAVGCCKGTDALLQHLE  
-EALARDLQKFP-TRDLGCVLLQYVDDLLGHPTAVGCAMRKTDLIQLHLE  
-EALARDLQKFP-TRDLGCVLLQYVDDLLGHPTSR-VAKGTDALLRHLE  
-EALAQDQKFP-SRDLGCVLLQYVDDLLGQPMVAVCTKG-ITLLQHLE  
-EALVZNLQKFP-PEDLGCILILYVDDNHLGHSMESGVQKG-RVLLWHLZ  
-EALARDPQKFP-TRDLGCVLLQYVDDLLGHPTAVGCCKGTDALHRHLG  
-EALARDPQKFP-SRDLGCVLLQZVDDLLGHPTAVGCCKGTDALHRHLE  
-EAWARDLQKFP-SRDLGCVLLQZVDDLLGHPTAVGCCKGTDALHRHLE  
-EAWARDLQKFP-SGDIGCMMLLQZVDDLLGHPTAVGCCKGTDALHRHLE  
-EAWARELQKFP-SRDLGCVLLQZVDDLLGHPTAVGCCKGTDALHRHLE  
-DAWARDLQKFP-SRDLGCVLLQZVDDLLGHPTAVGCCKGTDALHRHLE  
-EAWARDLQKFP-SRDLGCVLLZVDDLLGHPTAVGCCKGTDALHRHLE  
-EAWARDLQKFP-SRDLGCVLLQZVDDLLLEHPTAVGCCKGTDALHRHLE  
-EAWARDLQKFP-SRDLGCVLLQZVDDLLGHPTAVGCCKGTDALHRHLE  
-EAWARDLQKFP-SRDLGCVLLQZVDDLLGHPTAVGCCKGTDALHRHLE  
-EAWARDLQKFP-SRDLGCVLLQZVDDLLGHPTAVGCCKGTDALHRHLE  
-EALARDLQKFP-TRDLGCVLLRZVDELLLGHTAVGCCKGTDALRRHLD  
-EALARDLQKFP-TGDLGCALLRZVDELLLGHTAVGCCKGTDALRRHLE  
-EALARDLQKFP-TGDLGCALLRZVDELLLGHTAVGCCKGTDALRRHLE  
-EAWARDLQKFP-TRDLGCVLLRZVDELLLGHTAVGCCKGTDALRRHLE  
-GALARDLQKFP-SRDLGCVLLRZVDELLLGHTAVGCCKGTDALRRHLE  
-EALAZDLQKFP-TRDLGCVLLQZVDELLLGHTAVGCCKGTDALRRHLE  
-EALARDLQKFP-TRDLGCVLLQZVDDLLGHPTAVGCCKGTDALRRHLE  
-EALATDLQKLP-TRDLGCVLLQYVDDLLLRHPTAVGCCKGTDALRRHLE  
---VARDLQKFP-TRDLGCVLLWZVDELLWGHPTAVGCCKGTDALRRHLE



Chr12\_100973302\_945\_po\_C\_Xz12/  
Chr19\_9685420\_817\_po\_C\_Xz6/10  
Chr13\_40936820\_719\_po\_C\_Xz9/10  
Chr7\_63858202\_1754\_po\_C\_Rz12/9  
ERV3\_chr7q21\_AC073210\_polputei  
Chr6\_110218096\_843\_po\_C\_Xz16/8  
Chr6\_110214535\_786\_po\_C\_Xz16/8  
ChrY\_3018841\_881\_po\_C\_Rz9/12  
ChrX\_86876098\_639\_po\_C\_Xz7/8  
Chr14\_68899917\_965\_po\_C\_Xz6/8  
ChrY\_23874437\_661\_po\_C\_Xz15/9  
ChrY\_27518418\_649\_po\_C\_Xz15/9  
ChrY\_25016892\_657\_po\_C\_Xz13/12  
ChrY\_19932937\_520\_po\_C\_Xz10/14  
ChrY\_22016414\_518\_po\_C\_Xz10/14  
Chr19\_58660155\_598\_po\_C\_Xz21/1  
Chr19\_58621153\_500\_po\_C\_Xz21/1  
Chr7\_139686987\_710\_po\_C\_Xz11/7  
Chr7\_1237651301\_1097\_po\_C\_Pz13/  
Chr11\_29579197\_930\_po\_C\_Pz8/12  
Chr4\_117329205\_488\_po\_C\_Xz3/16  
Chr21\_38522185\_383\_po\_C\_Xz7/9  
Chr4\_70173370\_1049\_po\_C\_Xz11/8  
Chr4\_70022513\_788\_po\_C\_Kz10/12  
Chr14\_105225894\_1027\_po\_C\_Xz13  
Chr7\_119241536\_761\_po\_C\_Xz11/1  
ChrY\_22564970\_567\_po\_C\_Xz9/10  
Chr21\_14409346\_1477\_po\_C\_Pz5/6  
ChrX\_51259700\_1396\_po\_C\_Pz7/8  
Chr6\_64985396\_1041\_po\_C\_Xz11/1  
ChrY\_20355209\_659\_po\_C\_Xz7/11  
Chr3\_34567166\_523\_po\_C\_Xz8/6  
Chr3\_122072468\_245\_po\_C\_Xz9/9  
Chr11\_58788475\_541\_po\_C\_Xz8/22  
Chr6\_137421042\_373\_po\_C\_Xz6/9  
Chr4\_115910608\_550\_po\_C\_Pz8/12  
ChrY\_13743185\_977\_po\_C\_Xz14/8  
HERV15  
ChrX\_117198092\_983\_po\_C\_Xz8/8  
Chr19\_21166030\_1412\_po\_C\_Xz9/1  
Chr19\_21213743\_913\_po\_C\_Xz14/1  
Chr19\_15957774\_569\_po\_C\_Xz8/10  
Chr11\_77508681\_297\_po\_C\_Xz19/1  
Chr13\_98250769\_738\_po\_C\_Xz7/13  
Chr6\_39968183\_513\_po\_C\_Pz10/9  
Chr15\_66867263\_645\_po\_C\_Xz11/1  
HERV18\_polputein  
HERVIP10FH\_polputein  
MER66\_polputein

-EALAGDLQKFKH-AKDPGCI ZLLYVDDLLLEHSTAVGCAKGM DALLRDLV  
-EALARDLQKLP-AEDLGCVLLLYMDDVLLGHSTAVGCTKGT DALLWHLE  
-EALARDLQKFP-TRDLGCVLLQZVDDLLLGHGPKAVRCAKGT DALHRRHLE  
-EALASDLKAYTPPNDN-CALLQYIDNLLLAAPTQEDCYWGTQDLLHLLW  
-EALASDLKAYTPPNDN-CALLQYIDNLLLAAPTQEDCYWGTQDLLHLLW  
-EALAADLKAYTPPDDN-CTLLQYVDDLLLMAPTRKDCYWGTQGLPHLLZ  
-EALAADLKAYTPPDDN-CTLLQYVDDLLLMAPTRKDCYWGTQGLPHLLZ  
-EAVP-RTQGLHPANNN-CALLNYVDDLLLVAPTHEDCYQRTQDLLHFVVC  
-EALP-RTQGLHPANNN-CALLNYVDDLLLVAPTREDCYQRTQDLLHFVW  
-EALASDLKAYTLPNNN-CALLQYIDNLLLAAPTQEDCYQGTQDFLYLLW  
-DTLASDIKAF TTPNDN-YTLLQYINDLLLAAPTGGRYQGIQDFLHLLY  
-DTLASDIKAF TTPNDN-YTLLQYINDLLLAAPTGGRYQGIQDFLHLLY  
-DTLASDIKAF TTPNDN-YTLLQYINDLLLAAPTGGRYQGIQDFLHLLY  
-NTLES DLKAHPHQMT--TVLLQYVNNLLADPTPGDCYQGTQVFLHHVY  
-NTLES DLKAHPHQMT--TVLLQYVNNLLADPTPGDCYQGTQVFLHHVY  
LEKHWS DLMAYTLPNSN-CTLLQYADELLL PAPIZEDCYRGTQDLFHF LZ  
RET LAS DLMAYTLPNSN-CALLQYIDELSLPAPT ZEECYRGTQDLLHLLZ  
-EALASDLKAYTLPNDN-CASLQYVDDLLLAAPTQEDCYQGTQDLLHLLZ  
-----LKAYTPPNDN-CTLLQYIDDLFLAAPTQEDCFQGTQGLPHLLZ  
--ALASDLKAZ--PNDN-CALLEYIDDL LPAAPTQEDCLQGIQDLLHLL-  
-----PQEK-PVLQELSEETEILPYPYIPLYQGR LPR-S-  
-----PQEK-PVLQESPEEIGILP--TVIY PPLLRPAPEES-  
--AQASDLKAYTPPNSD-CVLLQYIDDL LLAAPTZEDCFQGTQGLPHLL-  
--ALASDLKVYTPPNSY-CVLLQYIDDL LLAAPTQEDCFQGTQDLLHLL-  
--ALASDLKAYTPPSSD-CVLLZYIDDL LLAAPTWKDCFQGTQDLLHLLG  
--ALASDLKAYTLPNNY-CALLEYIDDL LLAAPTQKDCFQGTQDLLYLL-  
-EVLASDLGAFIPNDK-6FZLQFIDNLLFMVPTQVDC LQGEKLLHLLW  
EEALASDLKAF TTPSDP-CILLPYIDDL LLAAPT RKECMQGTESLLZALW  
EEGLVSDLKAF TTPSDR-CILLPYIDDL LLAAPT RKECIEGTENLLZVLW  
KEALP-DLKAFMPPSDR-RVLLQYIDDL LLAAPTKEECFQGTESFLRVLW  
EEALASDLKAFMPPSGH-CVLLQYIDDL--APTKEECFQGTESLLRVLW  
EEALASDLKAFVPPSDR-CVLLQYIDDL LLAAPTKEECFQGTESLLRVLW  
EEALT-DLKAFVPPSDP-CVLLQYIDDL LLAAPTKEECFQGTESLLRVLW  
QAQGLQSLQYQZEVLTW-NKGWREKGHQYQKCLKRSARSQESSEFCERL  
RLKGYKFAAVLRGT PNG-INAGEKKATNIGKVSEVRQKPKDSEGFYERL  
NVNGAKGK DTERMNQEN-KENGQD--HGIRKPLQGLLHPK TQNLLHLLW  
EDALATNLEAFAPFSDN-SVVLQYIDDL LLAAPRREY LQGIERLLHLLC  
EDALATNLEAFAPFSDN-SVVLQYIDDL LLAAPRREY LQGIERLLHLLC  
EEALATDLEAFAPFSDN-YVLLQHIDDL FLFAAPTREZLQGTERRLLHVC  
KEALATDLEAFAPFSDN-SVLLQYIDDL LLAAPT RKEECLQGTERRLLHLL  
EEALATDLEAFAPFSDN-CVLLZYIDDL LLAAPT RKEECLQGTERRLLHLL  
-EALASNLKAYTLPNDN-CALFQYVDDLLLAAPTREDYQGTQDLLHLLW  
-ETLASDLKAYTPPNDN-LCLLQYTGDDLLLAAPTQEDYQGTQDLLHLLW  
-EALASDLRPIPHQMITNGALLWYMDLLLVAPT ZEDCYRGTQDLLHLLG  
-EVLASDL-AVVPNDK-CILLCQIENLLFAAPT ZVDC LQVTKLLHLLW  
-EALASDLKAYTAPNSD-CVLLHYIDDL LLAAPTREDCFQGTQDLLHLLW  
--LVATDLAAWKCPKG--VHLFHYIDDL MLTSDSLADLEAAAPLLRQLHLA  
----KPFVVRKIFRTPLSFLLRERVATPAGPSPRGRGRRGENSSISWQ  
VXVMIRFMKGNLZKEFLCMIKLAI IKRKLFTIDFLKNGYVXKPNFLKVL I

HERVI\_polputein  
HERVIP10F\_polputein  
HERVadp\_AC005741  
HERV-PT47D  
HERV\_W\_chr6\_141432567\_ERV9\_lik  
ERV9\_PH1\_RT  
Chr13\_54564403\_572\_po\_C\_Yz7/14  
HERV\_Y\_chr12\_51022911\_pol  
HERV17\_polputein  
HERV\_W\_chr7\_9105739\_syncytin\_p  
HERV9\_polputein  
HUERS-P3\_polputein  
ERVfrd\_AC004022  
PRIMA41\_polputein  
HERV\_H\_RGH1\_pol  
HERVHRGH2\_pol  
HERV\_H48I\_polputein  
HERV\_H\_RTVLH2\_pol  
HERVHFH21\_pol  
HERVRblike\_chr4\_109047953  
ChrY\_13790029\_693\_po\_C\_Xz12/11  
HERVS71\_polputein  
BaEV\_M7\_pol  
HERVR\_polputein  
AKR\_MLV\_MLOCG\_RT  
GaLV\_pol

FE-----GLRVSK-----GKLQCM EPKVYLGRLISAG-KRRIGPEW  
FE-----GLRVSK-----RKLQYVEPEVKYLGHLISAG-KRRIGPER  
ER-----GLZVSK-----NKMQFVEKEVKYLGHLIN EG-KWRINPER  
FE-----ELRVSK-----KKLQYVEPEVKYLGHLISAG-KZRIGPER  
NQ-----GYKVS K-----SKAQFCPQQVKYLG LILARG-TRALSER  
NQ-----GYKVS M-----SKAQLCLQQVKYLG LILAKG-TRALSKEZ  
TC-----GYKVS K-----LKAQLCSQQVKYLG LKLSKG-TRALSEER  
TN-----GYMVS K-----TKSQLCSQQVKYLG LKLSKG-NRALSEEC  
TC-----GYKVS K-----PKAQLCSQQVKYLG LKLSKG-TRALSEER  
TC-----GYMVS K-----PKAQLCSQQ--YLGLKLSKG-TRALSEEH  
NQ-----GYKAS R-----SKVQLCLQQA KYLG LILARG-TRALSKEZ  
DR-----GYKVS K-----SKAQLCXTSVKYLG LVLSEG-TRALGEER  
DR-----RYKVS K-----AKTQLLRQAIQYLG IIMSLK-EHKLSAEZ  
TN-----GYRVSL-----HKAHVSTQEVKYLRVYVLT PG-TWAIAPRK  
-----  
SK-----GYPS-----KAQMSSPSVYTLGI IILHKN-TRALPADS  
ER-----GYQVSP-----KKAQICTPSVYTLG LALTPZ-TRGLTTDR  
-----QAQVSSSSVYTL SIIILK--THVLSLLI  
NK-----GYRVSS-----KEQLS TSMVYTLGIQLSPG-ARAMTPAR  
AC-----EYKVSS-----KKAQICKQTIEYLGFL LQE--QRALTVER  
EL-----RYQVSA-----KSQLCLP-RVSYLGYEINRG-KRALISAC  
EL-----GYWVSA-----KKAQLCL-QTFYLG YKINKG-ERALATAR  
EK-----GYRASA-----KKAQICQTKVYTLGY IILSEG-KRWLTPGR  
EK-----GYRASA-----KKAQICQTKVYTLGY IILSEG-KRWLTPGR  
NL-----GYRASA-----KKAQICQKQVKYLG YLLKEG-QRWLTBEAR  
KL-----GYRVSA-----KKAQLCQREVYTLGYLLKEG-KRWLTPAR





Chr19\_58660155\_598\_po\_C\_Xz21/1  
Chr19\_58621153\_500\_po\_C\_Xz21/1  
Chr7\_139686987\_710\_po\_C\_Xz11/7  
Chr7\_137651301\_1097\_po\_C\_Pz13/  
Chr11\_29579197\_930\_po\_C\_Pz8/12  
Chr4\_117329205\_488\_po\_C\_Xz3/16  
Chr21\_38522185\_383\_po\_C\_Xz7/9  
Chr4\_70173370\_1049\_po\_C\_Xz11/8  
Chr4\_70022513\_788\_po\_C\_Kz10/12  
Chr14\_105225894\_1027\_po\_C\_Xz13  
Chr7\_119241536\_761\_po\_C\_Xz11/1  
ChrY\_22564970\_567\_po\_C\_Xz9/10  
Chr21\_14409346\_1477\_po\_C\_Pz5/6  
ChrX\_51259700\_1396\_po\_C\_Pz7/8  
Chr6\_64985396\_1041\_po\_C\_Xz11/1  
ChrY\_20355209\_659\_po\_C\_Xz7/11  
Chr3\_34567166\_523\_po\_C\_Xz8/6  
Chr3\_122072468\_245\_po\_C\_Xz9/9  
Chr11\_58788475\_541\_po\_C\_Xz8/22  
Chr6\_137421042\_373\_po\_C\_Xz6/9  
Chr4\_115910608\_550\_po\_C\_Pz8/12  
ChrY\_13743185\_977\_po\_C\_Xz14/8  
HERV15  
ChrX\_117198092\_983\_po\_C\_Xz8/8  
Chr19\_21166030\_1412\_po\_C\_Xz9/1  
Chr19\_21213743\_913\_po\_C\_Xz14/1  
Chr19\_15957774\_569\_po\_C\_Xz8/10  
Chr11\_77508681\_297\_po\_C\_Xz19/1  
Chr13\_98250769\_738\_po\_C\_Xz7/13  
Chr6\_39968183\_513\_po\_C\_Pz10/9  
Chr15\_66867263\_645\_po\_C\_Xz11/1  
HERV18\_polputein  
HERVI10FH\_polputein  
MER66\_polputein

HERVI\_polputein  
HERVI10F\_polputein  
HERVadp\_AC005741  
HERV-PT47D  
HERV\_W\_chr6\_141432567\_ERV9\_lik  
ERV9\_PH1\_RT  
Chr13\_54564403\_572\_po\_C\_Yz7/14  
HERV\_Y\_chr12\_51022911\_pol  
HERV17\_polputein  
HERV\_W\_chr7\_9105739\_syncytin\_p  
HERV9\_polputein  
HUERS-P3\_polputein  
ERVfrd\_AC004022  
PRIMA41\_polputein  
HERV\_H\_RGH1\_pol  
HERVHRGH2\_pol  
HERV\_H48I\_polputein  
HERV\_H\_RTVLH2\_pol  
HERVHF21\_pol  
HERVRblike\_chr4\_109047953  
ChrY\_13790029\_693\_po\_C\_Xz12/11  
HERVS71\_polputein  
BaEV\_M7\_pol  
HERVR\_polputein  
AKR\_MLV\_MLOGC\_RT  
GaLV\_pol  
Chr3\_158587414\_1662\_po\_C\_Ez10/  
Chr3\_79627623\_1138\_po\_C\_Ez4/7  
Chr19\_20477244\_1350\_po\_C\_Ez10/  
Chr5\_111890459\_1626\_po\_C\_Ez10/  
ChrX\_48766518\_1600\_po\_C\_Ez6/3  
ChrX\_152580713\_1572\_po\_C\_Ez10/  
ChrX\_139287533\_1154\_po\_C\_Xz8/4  
Chr2\_52615786\_912\_po\_C\_Xz11/5  
HERV-E\_4\_1  
ChrY\_21962399\_1137\_po\_C\_Xz13/9  
ChrY\_8634032\_950\_po\_C\_Xz14/10  
Chr3\_126735360\_997\_po\_C\_Xz5/10  
Chr3\_126713203\_958\_po\_C\_Xz7/8  
Chr3\_75226118\_977\_po\_C\_Xz8/9  
Chr7\_6629919\_827\_po\_C\_Xz8/7

KQ-----AICALP-----TPATQRQI-EFLEAARF---IPNCSLMA  
KQ-----AICALL-----TPTTRZQI-EFLDAATFCHIWIWPNFSLMA  
KQ-----AICALP-----TPTTZRQMREFLGAAGFCCIWIWPNFSLMA  
KK-----AVCALP-----TPNTQRQIREFLGAAGFCCIWIWPNFSLMA  
KL-----AVCALP-----TPTTQHQRZFWGTAWFCHIWIWPNFSLMA  
RP-----AASGLA-----TP---RLCRCLSGRLRDPFIMIN----MA  
KP-----AASSLA-----MP---GLCRCLPGKLRDPSIILN----MA  
KQ-----TICTLP-----TPTTR--TREFLGPAGSCCIWIWPNFSLMA  
KQ-----VVCALP-----TPTTWZKIREFLGVAGLCHIWIWPNFSLMA  
KA-----GFCVLP-----TPTTWZQMRELLKAAGFCHIWIWPNFSLMG  
KQ-----AVCVLP-----TPTT-WCQIEFLGAAGFCCIWIWPNFAVMA  
KR-----TVCALP-----PTTG-CQIREFLGAAGFCHIYIPNFFLMA  
KE-----TVCSIP-----QPDTRRQVREFLGAAGFSRIWIWPNFSLLA  
KE-----TVCSIP-----WPDTTWHVREFLGVAGFCRIWIWPNYLLLA  
KE-----TVCGIP-----QPGTQQVWEFLGAAGLSHIWIWPNFSLAK  
KE-----TVHGIL-----RPDSRQQVRDFIEAAGFCHIZIPNYLFLA  
KG-----TVCGIP-----ZPDTRRQVWEFLGAAGFCCIWIWPNFSLLA  
KE-----NMCVIP-----LPDTRRQVQELLGADGFCHIWIWPNYLLLA  
ALGVSATQLIEVA-----TKVYINQDQETKKEAN--QKLLPNFLLAA  
G--VNITQLIQVA-----TKVFNQKKEAKRKARC-RAKEKADLLAV  
KZ-----AVCAFP-----TPTTRCQIRKFLGAAGF-RIWTLNFFLMA  
KE-----ALCALP-----TSVTRQVREFLGAAGLCHIWIWPNFSLIA  
KE-----ALCALP-----TSVTRQVREFLGAAGLCHIWIWPNFSLIA  
KE-----AVCALP-----TPVTR--REFLGVAGFCRICIPNFFSLTA  
KE-----AMCIVH-----PVTRRQVREFLGVVRFRIWIWPNFSLIA  
KK-----AVCALP-----TPVTRQ--REFLGMAGFCZIWIWPNFSLIA  
KQ-----AICALP-----TPTTRCQIRZFLGAAGFCCIWIWPNFSLMA  
KQ-----DVCALP-----IPTTRCQIREFLGAAGCPIWIWPNFSLMA  
ML-----LICSFAPATLTQPGAHKNMCMKQGLRDLGLFRMCLVNKMPFTG  
KQ-----AVVLP-----TPTTQRQVFLRVAGFCCIWIWPNFSLMV  
KQ-----AVWTLN-----TPITWZQIREFLGAAGFCCIWIWPNFSLMA  
DK-----IQAYPR-----PTMVRQLQTFVGLLGYWRAFPVPHLAQMI  
RE-----RGRERETERKEGKVRERERQVKERKKER  
FVS-----SCEFFP-----LVLLLWPDAKVFLRSVGAVFSPIVSIID

KLLYQKLAQKGP-----EHLWTSKEVD-----QVKELKGI  
KLLYQKLAQKGP-----NRLWTSKEVD-----QVEKLER  
KILYLKLEEEP-----NPLZWSPEEQ-----AVKELKQA  
KLLHQLAQKGP-----NPLWTSKEVD-----QVKELTER  
RPLYTLIKETQRANTH-----LVEWPEAET-----AFKTLKQA  
AP---LIKETQRANTH-----LVEWPEAET-----TFKTLKQA  
RPLYTLIKETQRANTH-----LVRWTPAEA-----AFQALKZA  
RPIYTLIKETQRANTY-----LVRWTPAEA-----AFQALKKA  
RPLYTLIKETQRANTH-----LVRWTPAEA-----AFQALKKA  
RSLNTLIKETQRANTH-----LVRWTEVEV-----AFQAL---  
RPLHTLIKETQRANTY-----LVEVT-RGRN-----SLQNLKAG  
CPLYHLIKETQAAKTH-----LLTWEPEAQK-----AFQALKQA  
KSLYQALKEGTNRDT-----IWEKNQEQ-----AFRZLKTA  
KSLCKALKG---AHVI-----FLNAVSIVKH-----TFNTLKEK  
-----  
KPLYKLTGKGLVNDPI-----DPKSFPHS-----SFHSLKTA  
KPLYQAAGKPLHEPL-----NPAQPITQ-----PFRLLRKA  
-----  
HPLYKAAKGPLNEPL-----NXSHN1LP-----SFRELQTA  
AAISKRSRP-----WEIEHQI-----TFEQLKHK  
KPLYTATGRNG-----PLVWTDTKKEZ-----AFKLNKKA  
KPLYTTTRNG-----PHVWTD-KEQ-----AFQNLKKA  
APLYALTKEST-----PFTWQTEHQL-----AFEALKKA  
APLYALTKEST-----PFTWQTEHQL-----AFEALKKA  
APLYPLTKTGT-----LFNWGPDQKQ-----AYQEIQA  
APLYPLTKESI-----PFIWTEHQ-----AFDHKKA  
KPLYRVTKGGD-----REPFEWGPLQQQ-----AFCKLKEK  
KPLYGVF-----EPSEWGPLRQQ-----AFCELKEK  
KPLYGITKGGN-----WEPFEWGPLQQQ-----AFCKLKEK  
KPLYRVTKWGD-----WERFEWGPLQQQ-----AFCKLKEK  
KPLYRVTEAG-----EPFEWGPLQQQ-----AFCKLKEK  
KPFYRVNNGD-----REPFEWGPLQQQ-----AFCKLKEK  
KSLYGVTKGGD-----REPLEWGPLQKQ-----AFCKLKEK  
KPLZGLTKGGT-----RNLSNGGPKQQ-----AFHVLKDK  
KPLYEVTKAGD-----QEPFEWGSQQQ-----AFHELKER  
NPVYGVTKRGE-----KEHFKWGSQQQ-----ASHZLKEN  
KPLYRVTKGGD-----WVLFWRPLQZQ-----DFCKLKEK  
KPLYEVTKGAG-----TGNLWNGSQQQ-----LFHELKEK  
KPLYEVTKGAG-----TGNLWNGSQQQ-----VFHELKEK  
KPLZEVTR-AG-----TGNLWADQQQ-----VFRELKEK  
KPLYEVTKGVG-----TGNLWNGSQQQ-----GFHELKEK

Chr4\_9166812\_811\_po\_C\_Xz8/10  
Chr12\_8478642\_834\_po\_C\_Xz12/7  
Chr10\_15187175\_787\_po\_C\_Xz11/5  
Chr11\_71819740\_854\_po\_C\_Xz11/9  
Chr11\_71519974\_886\_po\_C\_Xz13/9  
Chr8\_7271441\_969\_po\_C\_Xz10/6  
Chr8\_11770066\_826\_po\_C\_Xz9/8  
Chr4\_4128362\_651\_po\_C\_Xz7/11  
Chr14\_50203955\_850\_po\_C\_Xz10/8  
Chr14\_50205291\_837\_po\_C\_Xz10/8  
Chr7\_6597120\_842\_po\_C\_Xz7/7  
Chr11\_71544658\_783\_po\_C\_Xz8/13  
Chr11\_67999520\_760\_po\_C\_Xz8/8  
Chr3\_75461975\_796\_po\_C\_Xz7/9  
Chr12\_52228939\_692\_po\_C\_Xz3/10  
Chr10\_15211234\_286\_po\_C\_Xz11/1  
Chr12\_100973302\_945\_po\_C\_Xz12/1  
Chr19\_9685420\_817\_po\_C\_Xz6/10  
Chr13\_40936820\_719\_po\_C\_Xz9/10  
Chr7\_63858202\_1754\_po\_C\_Rz12/9  
ERV3\_chr7q21\_AC073210\_polputei  
Chr6\_110218096\_843\_po\_C\_Xz16/8  
Chr6\_110214535\_786\_po\_C\_Xz16/8  
ChrY\_3018841\_881\_po\_C\_Rz9/12  
ChrX\_86876098\_639\_po\_C\_Xz7/8  
Chr14\_68899917\_965\_po\_C\_Xz6/8  
ChrY\_23874437\_661\_po\_C\_Xz15/9  
ChrY\_27518418\_649\_po\_C\_Xz15/9  
ChrY\_25016892\_657\_po\_C\_Xz13/12  
ChrY\_19932937\_520\_po\_C\_Xz10/14  
ChrY\_20104614\_518\_po\_C\_Xz10/14  
Chr19\_58660155\_598\_po\_C\_Xz21/1  
Chr19\_58621153\_500\_po\_C\_Xz21/1  
Chr7\_139686987\_710\_po\_C\_Xz11/7  
Chr7\_137651301\_1097\_po\_C\_Pz13/1  
Chr11\_29579197\_930\_po\_C\_Pz8/12  
Chr4\_117329205\_488\_po\_C\_Xz3/16  
Chr21\_38522185\_383\_po\_C\_Xz7/9  
Chr4\_70173370\_1049\_po\_C\_Xz11/8  
Chr4\_70022513\_788\_po\_C\_Kz10/12  
Chr14\_105225894\_1027\_po\_C\_Xz13/1  
Chr7\_119241536\_761\_po\_C\_Xz11/1  
ChrY\_22564970\_567\_po\_C\_Xz9/10  
Chr21\_14409346\_1477\_po\_C\_Pz5/6  
ChrX\_51259700\_1396\_po\_C\_Pz7/8  
Chr6\_64985396\_1041\_po\_C\_Xz11/1  
ChrY\_20355209\_659\_po\_C\_Xz7/11  
Chr3\_34567166\_523\_po\_C\_Xz8/6  
Chr3\_122072468\_245\_po\_C\_Xz9/9  
Chr11\_58788475\_541\_po\_C\_Xz8/22  
Chr6\_137421042\_373\_po\_C\_Xz6/9  
Chr4\_115910608\_550\_po\_C\_Pz8/12  
ChrY\_13743185\_977\_po\_C\_Xz14/8  
HERV15  
ChrX\_117198092\_983\_po\_C\_Xz8/8  
Chr19\_21166030\_1412\_po\_C\_Xz9/1  
Chr19\_21213743\_913\_po\_C\_Xz14/1  
Chr19\_15957774\_569\_po\_C\_Xz8/10  
Chr11\_77508681\_297\_po\_C\_Xz19/1  
Chr13\_98250769\_738\_po\_C\_Xz7/13  
Chr6\_39968183\_513\_po\_C\_Pz10/9  
Chr15\_66867263\_645\_po\_C\_Xz11/1  
HERV18\_polputein  
HERVIP10FH\_polputein  
MER66\_polputein

KTLYEVTKGAG-----TGPLECGSQQQQ-----VFHELKEK  
-PFYEVTKGAE-----TGNFWNGSQQQQ-----VFHELZEK  
-PLYEVTKGAG-----TGLLECGSQQQQ-----VFHELKEK  
KPLYAVTKGAG-----TGKLNWNGCQQQQ-----GFHEL-KK  
KPLYEVTKGAG-----TGNLWNVDQQQZ-----VFHELKEK  
KFLYEVTTRGTG-----TGNLWNEDQQQQ-----VFHELKEK  
KPLYEAVTNGAG-----TGNLWNADQQQQ-----VFHELKEK  
KTLYEVTKGAG-----TGLFEWGFQQZQ-----VFHELKEK  
KPLYEVTKGTG-----TEPFEWGSQQQQ-----VFHELKEK  
KPLYEVTKGTG-----TEPFEWGSQQQQ-----VFHELKEK  
KLLYEVTKGQGGG-----TGHFEWGSQQQQ-----VFHELKEK  
KPLYEVTKGAG-----TGLFEWGSQQQQ-----VFHELKEK  
KTLYKVTTRGRG-----WEIFEWGSQQQQ-----AFRELKEK  
KPLYEITKGAG-----TGPFLFELGSQQQQ-----AFHELKEK  
KPLYEATKNGT-----GPFEWGSQQQQ-----AFHELKKK  
KPLFEVTKEAG-----TGPFEWGSQQQQ-----VFHELKEK  
KPLYGVTKGGD-----WEPCEWGPLQQQ-----AFCKLKEK  
KPLYRVTKGGD-----QVSFERGPLQQQ-----AFCKLKEK  
KPFYEATKGVG-----TANLWNGSQQQQ-----VFHELKEK  
RPLYEATREGEK-----EPLLZKADQKK-----VFKQIKEA  
RPLYEATREGEK-----EPLLZKADQKK-----VFKQIKEA  
KPLYEDTKGGER-----EPVLWEADQZR-----AFKQIKEA  
KPLYEDTKGGER-----EPVLWEADQZR-----AFKQIKEA  
SPYMKPKQKVES-----EPLLWETDQEK-----AFKQIKEA  
SPYMKPKQKVES-----EPLLWETDQEK-----AFKQIKEA  
KPLYEATKLGK-----EPLLWEADQEK-----AFKQIKKV  
KPLYKGTKRGER-----KPLLZEAVQEK-----VFKQAKEA  
KPLYKGTKRGER-----KPLLZEAVQEK-----VFKQAKEA  
KPLYKGTKRGER-----KPLLZEAVQEK-----VFKQAKEA  
KPLHKGTKRGER-----EPLLLEVQEK-----VFKQPKQA  
KPLHKGTKRGER-----EPLLLEVQEK-----VFKQPKQA  
KSLIGSHKKRRK-----GAPPLKPNQEI-----DFKQVKEA  
KLLYDATKGGG-----EPLFZKTNQEI-----AFKQIKEA  
KPLYEATKWGEK-----EPLLWETNQEI-----AFKQIKEA  
KPLYEATKWGEK-----EPLLWEADQEK-----AFKQIKEA  
RPLYEATKEGE-----EPLLWEADQDR-----AFKQIKEA  
R-----FKRGEK-----EPLLWEVDQEK-----VFKQIKEA  
R-----FKGREK-----EPLLWEADQEK-----AFKKIKEA  
KPLYEATKRK-----EPLLWEADQEK-----AFKEIKEA  
KLLYETTKWGK-----ETILWEANQEK-----AFKEIKEA  
KPLYEATKRK-----EPLLWEATQEK-----AFZZIKGD  
KPLPEATKQGER-----EPLLWEADQER-----TFKQIKEG  
KLLYEATEWQKR-----APSLGSGSQGS-----LQGIKRA  
KPLYEATKRGK-----KEPLLWGKEQD-----MAFKEIKKA  
KPLYEATKVG-----KEPLLWGKEQD-----MAFKEIKKA  
----PLYETTK-----GRGERTPLWGKEQD-----TAFKEIKKA  
SVRLALCEBAT-----GWGKRTPLVGKRAA-----HGLQRNQKA  
KTLYEATKVGE-----KEP-----LLWRKEQD-----MAFKEIKKV  
KPLYKAPKLGR-----GQGGRIPLWEKEQD-----MAFKDIKKA  
ALMGRADFSKRHWGGERGQYGGGFKSWLRLKEDZCVWCKRKGZEDC  
ALVGRETFGVF-----GVVVVAVMIED-----KLGKTRKLS  
KPLYEATKREK-----EPLLWGKQD-----MAFKEIKKA  
RPLFEASKGKE-----REPLLWEKEZE-----KAFKDIKEA  
RPLFEASKGKE-----REPLLWEKEQE-----KAFKDIKEA  
RPLYEAIKGE-----REPLLWQKQE-----KAFKDIKEA  
RPLHEATRGRE-----REPLLWEKEQE-----KTFKDIKEA  
RPLYEATKGGZ-----REPLLWEKEKE-----KAFKGIKEA  
KPLYEATKIG-----EKQPLLSKTNQEI-----AFEQIKEA  
VPLYEATKGG-----QKNPPLGDZ-SEN-----AFQIKEA  
SILGKGRHRS PASI-----NQGHNALRKATGTS-----ALESGLVS  
KPLYEATNGG-----IGEPLLWEADQKR-----LFFKIKKA  
KPLYEATKWG-----EKEPLLLEANQEK-----AFKEIKEA  
KPLYQLTKKGA-----AWDWDDEAET-----AFLAAKRA  
DRSSKEKTYP-----IPLKAR  
IILFLAFSLTIT-----LLRRVLRAN-----ECLPTSIP

HERVI\_polputein  
HERVIP10F\_polputein  
HERVadp\_AC005741  
HERV-PT47D  
HERV\_W\_chr6\_141432567\_ERV9\_lik  
ERV9\_PH1\_RT  
Chr13\_54564403\_572\_po\_C\_Yz7/14  
HERV\_Y\_chr12\_51022911\_pol  
HERV17\_polputein  
HERV\_W\_chr7\_9105739\_syncytin\_p

LITALALALPSLKY-TSLFVSEK-GVALGVLIQEHR----GCWQPMAFLS  
LITAPVLALPSLEKPFHLFVNVDGVALGVLTQEHR---GRRQPVAFLS  
LITAPVLAFFPLEKPFHLFVTVDQGVALLTQTTLG---GKRQPVAFVS  
LITSPVLALPSLEKPSHIFFFFFEMESCSVAQAG-----VQV  
LVQAAALTLPTG-QNFSL--YVTDRAEIALGVLIQT--CGTTPQPVAYLS  
LVQAPALSLPTG-QNFSL--YVRERARIALGVLTQT--HGTTQPVAYLS  
LTQAPVLSLPTG-QDFSL--YVTEETGIALRVLTQV--RGMSLQPVAYLS  
LTQAPVLSLPTG-QDFSL--YVTEK-GIALGVLTQV--RGMSLQPVAYLS  
LTQAPVLSLPTG-QDFSL--YVTEKTGIALGVLTQV--RGMSLQPVAYLS  
-TQAPVLSLPTG-QDFSS--YVTEKTGIALGVLTQI--RGMSLQPVAYLT

HERV9\_polputein  
 HUERS-P3\_polputein  
 ERVfrd\_AC004022  
 PRIMA41\_polputein  
 HERV\_H\_RGH1\_pol  
 HERVHRGH2\_pol  
 HERV\_H48I\_polputein  
 HERV\_H\_RTVLH2\_pol  
 HERVFH21\_pol  
 HERVRblike\_chr4\_109047953  
 ChrY\_13790029\_693\_po\_C\_Xz12/11  
 HERVS71\_polputein  
 BaEV\_M7\_pol  
 HERVR\_polputein  
 AKR\_MLV\_MLOGC\_RT  
 GaLV\_pol  
 Chr3\_158587414\_1662\_po\_C\_Ez10/  
 Chr3\_79627623\_1138\_po\_C\_Ez4/7  
 Chr19\_20477244\_1350\_po\_C\_Ez10/  
 Chr5\_111890459\_1626\_po\_C\_Ez10/  
 ChrX\_48766518\_1600\_po\_C\_Ez6/3  
 ChrX\_152580713\_1572\_po\_C\_Ez10/  
 ChrX\_139287533\_1154\_po\_C\_Xz8/4  
 Chr2\_52615786\_912\_po\_C\_Xz11/5  
 HERV-E\_4\_1  
 ChrY\_21962399\_1137\_po\_C\_Xz13/9  
 ChrY\_8634032\_950\_po\_C\_Xz14/10  
 Chr3\_126735360\_997\_po\_C\_Xz5/10  
 Chr3\_126713203\_958\_po\_C\_Xz7/8  
 Chr3\_75226118\_977\_po\_C\_Xz8/9  
 Chr7\_6629919\_827\_po\_C\_Xz8/7  
 Chr4\_9166812\_811\_po\_C\_Xz8/10  
 Chr12\_8478642\_834\_po\_C\_Xz12/7  
 Chr10\_15187175\_787\_po\_C\_Xz11/5  
 Chr11\_71819740\_854\_po\_C\_Xz11/9  
 Chr11\_71519974\_886\_po\_C\_Xz13/9  
 Chr8\_7271441\_969\_po\_C\_Xz10/6  
 Chr8\_11770066\_826\_po\_C\_Xz9/8  
 Chr4\_4128362\_651\_po\_C\_Xz7/11  
 Chr14\_50203955\_850\_po\_C\_Xz10/8  
 Chr14\_50205291\_837\_po\_C\_Xz10/8  
 Chr7\_6597120\_842\_po\_C\_Xz7/7  
 Chr11\_71544658\_783\_po\_C\_Xz8/13  
 Chr11\_67999520\_760\_po\_C\_Xz8/8  
 Chr3\_75461975\_796\_po\_C\_Xz7/9  
 Chr12\_52228939\_692\_po\_C\_Xz3/10  
 Chr10\_15211234\_286\_po\_C\_Xz11/1  
 Chr12\_100973302\_945\_po\_C\_Xz12/  
 Chr19\_9685420\_817\_po\_C\_Xz6/10  
 Chr13\_40936820\_719\_po\_C\_Xz9/10  
 Chr7\_63858202\_1754\_po\_C\_Xz12/9  
 ERV3\_chr7q21\_AC073210\_polputei  
 Chr6\_110218096\_843\_po\_C\_Xz16/8  
 Chr6\_110214535\_786\_po\_C\_Xz16/8  
 ChrY\_3018841\_881\_po\_C\_Rz9/12  
 ChrX\_86876098\_639\_po\_C\_Xz7/8  
 Chr14\_68899917\_965\_po\_C\_Xz6/8  
 ChrY\_23874437\_661\_po\_C\_Xz15/9  
 ChrY\_27518418\_649\_po\_C\_Xz15/9  
 ChrY\_25016892\_657\_po\_C\_Xz13/12  
 ChrY\_19932937\_520\_po\_C\_Xz10/14  
 ChrY\_20104614\_518\_po\_C\_Xz10/14  
 Chr19\_58660155\_598\_po\_C\_Xz21/1  
 Chr19\_58621153\_500\_po\_C\_Xz21/1  
 Chr7\_139686987\_710\_po\_C\_Xz11/7  
 Chr7\_137651301\_1097\_po\_C\_Pz13/  
 Chr11\_29579197\_930\_po\_C\_Pz8/16  
 Chr4\_117329205\_488\_po\_C\_Xz3/12  
 Chr21\_38522185\_383\_po\_C\_Xz7/9  
 Chr4\_70173370\_1049\_po\_C\_Xz11/8  
 Chr4\_70022513\_788\_po\_C\_Kz10/12  
 Chr14\_105225894\_1027\_po\_C\_Xz13  
 Chr7\_119241536\_761\_po\_C\_Xz11/1  
 ChrY\_22564970\_567\_po\_C\_Xz9/10  
 Chr21\_14409346\_1477\_po\_C\_Pz5/6  
 ChrX\_51259700\_1396\_po\_C\_Pz7/8  
 Chr6\_64985396\_1041\_po\_C\_Xz11/1

PVQVPALSLPT---NFSL--YVTERAGIALGVLTTQT--LGTTPQPVAYLS  
 LLKAPALSLPVG-KAFNL--YVSERKGMALGVLTTQA--RGPXQQPVGYSLS  
 LSEQPALELPILTTPKPF--FITHEKAGIALGVLTTET--LGPVRRPVAYLS  
 LGTTPALGIPNL-DKPF--YLAEK-QGALEVLVQK--LGG-IPPVAYFS  
 -----  
 LETVSTLALPDITPLF-I--HTAEVQGCVRILTQ---GPGSHPVAFVLS  
 LTSAPVLTLPDLTKPFSL--YTERRGVTLGVLTTQSK--GPTLQVVAYLS  
 -----AVRILTQ---EPGHPVAFVLS  
 LVTAPALSLPNI SQPFTL--YTAKNRGIALGVLTTQK--LGEIQLPVAYFS  
 LISALAPGLPNPHKLFQP--YMERLGLALWVLTTQK--LGEIQLPVAYFS  
 LTEAPTALGPNLTKPF--FHEKAGIALGVLTTET--LGPVRRPVAYLS  
 LTVPALALPNISEPFHL--FVHESQGVTKGVLTTQT--LGPWZCPVAYLS  
 LLSAPALGLPDTSKPFTL--FLDERQGIAGVLTTQK--LGPWKRVPVAYLS  
 LLSAPALGLPDTSKPFTL--FLDERQGIAGVLTTQK--LGPWKRVPVAYLS  
 LTLVAPALGPNLTKPF--FVDEKQGYAKGVLTTQK--LGPWRRPVAYLS  
 LLSAPALALPDLTKPFTL--YIDERAGVARGVLTTQT--LGPWRRPVAYLS  
 FMLALPALGLSDVTKPF--LYVSERETMAVGLTTQT--VGHWRPAAVYLS  
 LMSAPALGLPDLAKPFT--LYTSERKMAAGVLTTQT--VGPWLRPVAYLS  
 LTLVAPALGPNLTKPFA--LYVSERETMAVGLTTQT--VGPWLRPVAYLS  
 FMSAPALGLPDLTKPFT--LYVSEREKTAAGVLIQT--VGPWTPPVAYLS  
 LMSAPSGLPDLTKPFT--LYVSEREKMAVGLTTQT--VGPWRRPVVYLS  
 LMSAPVGLPDLTKPFT--LYVSEREKMAVGLTTQT--VGPQRPVAYLS  
 LMSAPALGPNLTKPFT--LYASEREKIAVGLTTQT--VGPWRRPVAYLS  
 LMTALALGPNLTKPFT--LYVSEREKMAVGLTTQT--VGPWLRPVAYLS  
 LMSVAPALGPNLTKPFT--LYVSESEKMAVGLTTQT--VGPWRRPVVYLS  
 LMSAPALGLPDTKPF--LYVSEGEZMAVGLTQS--MGPWRLMAVYLS  
 FMSTPAIGLPDLTKPFA--FYVSEREKMAAGVLTQT--VGPWRRPVVYLS  
 LLAAPALGPNLTKPFP--LYASEREKMAAGLZTQT--VGPWLRPVVYLS  
 LLAAPALGLPELRKPF--LCASEREKMAAGLZTQT--VGPWLRVAVYLS  
 LLAAPALGPNLTKPFP--LYASEREKMAAGLZTQT--VGPWRRPVAYLS  
 LMSAPALGPNLTKPFP--LYASEREKMAAGLZTQT--VGPWRRPVAYLS  
 LMSAPALGPNLTKPFP--LYASEREKMAAGLZTQT--VGPWRRPVAYLS  
 LQAAGPALGPNLTKLFP--LYASEREKMAAGLZTQT--VGPWRRPVAYLS  
 LLAAPALGPNLTKPFP--LYASEREKMAAGLZTQT--VGPWRRPVAYLS  
 PAAAPALGPNLTKPFP--LYASEREKMAAGLZTQT--VGPWRRPVAYLS  
 LLAAPALGPNLTKPFP--SYN-EREKMAAGLZTQT--VGPWRRPVAYLS  
 LLAAPALRPLDLTKPFP--LYASERERMAAGLZTQT--VGPWLRVAVLC  
 LLAAPALGPNLTKPFP--LYKEREKDGSWTL-TQT--VGPWRRPVAYLS  
 LRSAPALGPNLTKPSP--ZYASEREKMAAGLZTQT--VGPWRRPVAYLS  
 LMSAPALGPNLTKPFP--SYVSEKMAAGLZTQT--VGPWRRPVAYLS  
 LMSAPALGPNLTKPFP--SYVSEKMAAGLZTQT--VGPWRRPVAYLS  
 LMSAPALGPNLTKPFT--SYVSEKMAAGLZTQT--VGPWRRPVAYLS  
 LMSAPALGPNLTKPFP--SYVPEREKRAAGLZTQT--VGPWRRPVAYLS  
 LMSAPALGPNLTKPFP--LCVREKRAAGLZTQT--VGPWRRPVAYLS  
 RLAAPALGPNLTKPFT--TYVSEKRAAGLZTQT--VGPWRRPVAYLS  
 LMSAPALGPNLTKPFT--LYVSEKRAAGLZTQT--VGPWRRPVAYLS  
 LMSAPALGPNLTKPFT--SYVSEKMAAGLZTQT--VGPWRRPVAYLS  
 LMSAPALGPNLTKPFT--LCVSEKMAAGLZTQT--VGYWRRPVAYLS  
 LTSAPALGPNLTKPFT--LYVSEKMAAGLZTQT--VGPWRRPVAYLS  
 LLAAPALGPNLTKPFP--LYASEREKMAAGLZTQT--VGPWRRPVAYLS  
 LTQAPALGPNLTKPFT--YVHEKGMAGLZTQT--IGSWRRPVAYLS  
 LTQAPALGPNLTKPFT--YVHEKGMAGLZTQT--IGSWRRPVAYLS  
 ITZAPALGPNLTKPFP--YVHEKGMAGLZTQT--IESLHRRPVAYLS  
 ITZAPALGPNLTKPFP--YVHEKGMAGLZTQT--IESLHRRPVAYLS  
 LTQVPALGPNLTKPFP--YVHEKGMAGLZTQT--LGSWHCLVAYLS  
 LTQVPALGPNLTKPFP--YVHEKGMAGLZTQT--LGSWHCLVAYLS  
 LTQVPALGPNLTKPFP--YVHEKGMAGLZTQT--LGSWHCLVAYLS  
 LTQAQAIPLNISKPF--HVHEKGMAGLZTQT--VKSZIRPVAYLS  
 LTQAQAIPLNISKPF--HVHEKGMAGLZTQT--VKSZIRPVAYLS  
 LTQAQAIPLNISKPF--HVHEKGMAGLZTQT--VKSZIRPVAYLS  
 LTKALAIPLNISKPF--EOKGLAIGLZTQT--MKSZHHHPVAYLS  
 LTKALAIPLNISKPF--EOKGLAIGLZTQT--MKSZHHHPVAYLS  
 LTQVPALRLZDITK--FY--MFMNKTMTIGALTQL--IGSWRRPVAYLS  
 LTQAPALRLZDITK--FY--YVHEKGMAGLZTQT--VKSZIRPVAYLS  
 LAQSPALGPNLTKPFP--YVHEKGMAGLZTQT--TGSWHHPVAYLS  
 LTQAPALGPNLTKPFP--YVHEKGMAGLZTQT--IGSWRRPVAYLS  
 LTQAPALGPNLTKPFP--YVHEKGMAGLZTQT--IGSWRRPVAYLS  
 L-----GLPDIKHSFL--YVHN-EMMTIGLZTQT--IGSWRRPVAYLS  
 LTQAPALGPNLTKPFP--YVHEKGMAGLZTQT--IGLWHRVLVAYLS  
 LTQAPTALGPNLTKPFP--YVHEKGMAGLZTQT--IGLWHRVLVAYLS  
 LTLVAPALGPNLTKPFP--YVHEKGMAGLZTQT--IGSWHCPVAYLS  
 LMSAPALGPNLTKPFP--YVHEKGMAGLZTQT--IGSWHCPVAYLS  
 LTQSPALGPNLTKPFP--IYVZMKRNGYTPDSS--HGIMASPVAYSS  
 LIQALALGPNLTKPFP--YVYEWKEVAVGLTQT--MGSWHIPVAYLS  
 LIQALALGPNLTKPFP--LYVHERKEMATVGLVQM--LGSWYLPVAYLS  
 LIQAPALGPNLTKPFP--LYVHERKEMATVGLVQM--LGSWYLPVAYLS  
 LIQVPALELPDMTRPFY--LYVHERKEMATVGLVQM--LGSZYPVAYLS







GaLV\_pol

Chr3\_158587414\_1662\_po\_C\_Ez10/  
Chr3\_79627623\_1138\_po\_C\_Ez4/7  
Chr19\_20477244\_1350\_po\_C\_Ez10/  
Chr5\_111890459\_1626\_po\_C\_Ez10/  
ChrX\_48766518\_1600\_po\_C\_Ez6/3  
ChrX\_152580713\_1572\_po\_C\_Ez10/  
ChrX\_139287533\_1154\_po\_C\_Xz8/4  
Chr2\_52615786\_912\_po\_C\_Xz11/5  
HERV-E\_4\_1  
ChrY\_21962399\_1137\_po\_C\_Xz13/9  
ChrY\_8634032\_950\_po\_C\_Xz14/10  
Chr3\_126735360\_997\_po\_C\_Xz5/10  
Chr3\_126713203\_958\_po\_C\_Xz7/8  
Chr3\_75226118\_977\_po\_C\_Xz8/9  
Chr7\_6629919\_827\_po\_C\_Xz8/7  
Chr4\_9166812\_811\_po\_C\_Xz8/10  
Chr12\_8478642\_834\_po\_C\_Xz12/7  
Chr10\_15187175\_787\_po\_C\_Xz11/5  
Chr11\_71819740\_854\_po\_C\_Xz11/9  
Chr11\_71519974\_886\_po\_C\_Xz13/9  
Chr8\_7271441\_969\_po\_C\_Xz10/6  
Chr8\_11770066\_826\_po\_C\_Xz9/8  
Chr4\_4128362\_651\_po\_C\_Xz7/11  
Chr14\_50203955\_850\_po\_C\_Xz10/8  
Chr14\_50205291\_837\_po\_C\_Xz10/8  
Chr7\_6597120\_842\_po\_C\_Xz7/7  
Chr11\_71544658\_783\_po\_C\_Xz8/13  
Chr11\_67999520\_760\_po\_C\_Xz8/8  
Chr3\_75461975\_796\_po\_C\_Xz7/9  
Chr12\_52228939\_692\_po\_C\_Xz3/10  
Chr10\_15211234\_286\_po\_C\_Xz11/1  
Chr12\_100973302\_945\_po\_C\_Xz12/  
Chr19\_9685420\_817\_po\_C\_Xz6/10  
Chr13\_40936820\_719\_po\_C\_Xz9/10  
Chr7\_63858202\_1754\_po\_C\_Rz12/9  
ERV3\_chr7q21\_AC073210\_polputei  
Chr6\_110218096\_843\_po\_C\_Xz16/8  
Chr6\_110214535\_786\_po\_C\_Xz16/8  
ChrY\_3018841\_881\_po\_C\_Rz9/12  
ChrX\_86876098\_639\_po\_C\_Xz7/8  
Chr14\_68899917\_965\_po\_C\_Xz6/8  
ChrY\_23874437\_661\_po\_C\_Xz15/9  
ChrY\_27518418\_649\_po\_C\_Xz15/9  
ChrY\_25016892\_657\_po\_C\_Xz13/12  
ChrY\_19932937\_520\_po\_C\_Xz10/14  
ChrY\_20104614\_518\_po\_C\_Xz10/14  
Chr19\_58660155\_598\_po\_C\_Xz21/1  
Chr19\_58621153\_500\_po\_C\_Xz21/1  
Chr7\_139686987\_710\_po\_C\_Xz11/7  
Chr7\_137651301\_1097\_po\_C\_Pz13/  
Chr11\_29579197\_930\_po\_C\_Pz8/12  
Chr4\_117329205\_488\_po\_C\_Xz3/16  
Chr21\_38522185\_383\_po\_C\_Xz7/9  
Chr4\_70173370\_1049\_po\_C\_Xz11/8  
Chr4\_70022513\_788\_po\_C\_Kz10/12  
Chr14\_105225894\_1027\_po\_C\_Xz13  
Chr7\_119241536\_761\_po\_C\_Xz11/1  
ChrY\_22564970\_567\_po\_C\_Xz9/10  
Chr21\_14409346\_1477\_po\_C\_Pz5/6  
ChrX\_51259700\_1396\_po\_C\_Pz7/8  
Chr6\_64985396\_1041\_po\_C\_Xz11/1  
ChrY\_20355209\_659\_po\_C\_Xz7/11  
Chr3\_34567166\_523\_po\_C\_Xz8/6  
Chr3\_122072468\_245\_po\_C\_Xz9/9  
Chr11\_58788475\_541\_po\_C\_Xz8/22  
Chr6\_137421042\_373\_po\_C\_Xz6/9  
Chr4\_115910608\_550\_po\_C\_Pz8/12  
ChrY\_13743185\_977\_po\_C\_Xz14/8  
HERV15  
ChrX\_117198092\_983\_po\_C\_Xz8/8  
Chr19\_21166030\_1412\_po\_C\_Xz9/1  
Chr19\_21213743\_913\_po\_C\_Xz14/1  
Chr19\_15957774\_569\_po\_C\_Xz8/10  
Chr11\_77508681\_297\_po\_C\_Xz19/1  
Chr13\_98250769\_738\_po\_C\_Xz7/13  
Chr6\_39968183\_513\_po\_C\_Pz10/9

WTLSFLLMAKPLYEATKWGEGTPLWGKEQVMFKEIKKALIQALALGLPD

Chr15\_66867263\_645\_po\_C\_Xz11/1 -----  
HERV18\_polputein -----  
HERVIP10FH\_polputein -----  
MER66\_polputein -----  
  
HERVI\_polputein -----  
HERVIP10F\_polputein -----  
HERVadp\_AC005741 -----  
HERV-PT47D -----  
HERV\_W\_chr6\_141432567\_ERV9\_lik -----  
ERV9\_PH1\_RT -----  
Chr13\_54564403\_572\_po\_C\_Yz7/14 -----  
HERV\_Y\_chr12\_51022911\_pol -----  
HERV17\_polputein -----  
HERV\_W\_chr7\_9105739\_syncytin\_p -----  
HERV9\_polputein -----  
HUERS-P3\_polputein -----  
ERVfrd\_AC004022 -----  
PRIMA41\_polputein -----  
HERV\_H\_RGH1\_pol -----  
HERVHRGH2\_pol -----  
HERV\_H48I\_polputein -----  
HERV\_H\_RTVLH2\_pol -----  
HERVVFH21\_pol -----  
HERVRblike\_chr4\_109047953 -----  
ChrY\_13790029\_693\_po\_C\_Xz12/11 -----  
HERVS71\_polputein -----  
BaEV\_M7\_pol -----  
HERVR\_polputein -----  
AKR\_MLV\_MLOCG\_RT -----  
GaLV\_pol -----  
Chr3\_158587414\_1662\_po\_C\_Ez10/ -----  
Chr3\_79627623\_1138\_po\_C\_Ez4/7 -----  
Chr19\_20477244\_1350\_po\_C\_Ez10/ -----  
Chr5\_111890459\_1626\_po\_C\_Ez10/ -----  
ChrX\_48766518\_1600\_po\_C\_Ez6/3 -----  
ChrX\_152580713\_1572\_po\_C\_Ez10/ -----  
ChrX\_139287533\_1154\_po\_C\_Xz8/4 -----  
Chr2\_52615786\_912\_po\_C\_Xz11/5 -----  
HERV-E\_4\_1 -----  
ChrY\_21962399\_1137\_po\_C\_Xz13/9 -----  
ChrY\_8634032\_950\_po\_C\_Xz14/10 -----  
Chr3\_126735360\_997\_po\_C\_Xz5/10 -----  
Chr3\_126713203\_958\_po\_C\_Xz7/8 -----  
Chr3\_75226118\_977\_po\_C\_Xz8/9 -----  
Chr7\_6629919\_827\_po\_C\_Xz8/7 -----  
Chr4\_9166812\_811\_po\_C\_Xz8/10 -----  
Chr12\_8478642\_834\_po\_C\_Xz12/7 -----  
Chr10\_15187175\_787\_po\_C\_Xz11/5 -----  
Chr11\_71819740\_854\_po\_C\_Xz11/9 -----  
Chr11\_71519974\_886\_po\_C\_Xz13/9 -----  
Chr8\_7271441\_969\_po\_C\_Xz10/6 -----  
Chr8\_11770066\_826\_po\_C\_Xz9/8 -----  
Chr4\_4128362\_651\_po\_C\_Xz7/11 -----  
Chr14\_50203955\_850\_po\_C\_Xz10/8 -----  
Chr14\_50205291\_837\_po\_C\_Xz10/8 -----  
Chr7\_6597120\_842\_po\_C\_Xz7/7 -----  
Chr11\_71544658\_783\_po\_C\_Xz8/13 -----  
Chr11\_67999520\_760\_po\_C\_Xz8/8 -----  
Chr3\_75461975\_796\_po\_C\_Xz7/9 -----  
Chr12\_52228939\_692\_po\_C\_Xz3/10 -----  
Chr10\_15211234\_286\_po\_C\_Xz11/1 -----  
Chr12\_100973302\_945\_po\_C\_Xz12/ -----  
Chr19\_9685420\_817\_po\_C\_Xz6/10 -----  
Chr13\_40936820\_719\_po\_C\_Xz9/10 -----  
Chr7\_63858202\_1754\_po\_C\_Rz12/9 -----  
ERV3\_chr7q21\_AC073210\_polputei -----  
Chr6\_110218096\_843\_po\_C\_Xz16/8 -----  
Chr6\_110214535\_786\_po\_C\_Xz16/8 -----  
ChrY\_3018841\_881\_po\_C\_Rz9/12 -----  
ChrX\_86876098\_639\_po\_C\_Xz7/8 -----  
Chr14\_68899917\_965\_po\_C\_Xz6/8 -----  
ChrY\_23874437\_661\_po\_C\_Xz15/9 -----  
ChrY\_27518418\_649\_po\_C\_Xz15/9 -----  
ChrY\_25016892\_657\_po\_C\_Xz13/12 -----  
ChrY\_19932937\_520\_po\_C\_Xz10/14 -----

ChrY\_20104614\_518\_po\_C\_Xz10/14 -----  
 Chr19\_58660155\_598\_po\_C\_Xz21/1 -----  
 Chr19\_58621153\_500\_po\_C\_Xz21/1 -----  
 Chr7\_139686987\_710\_po\_C\_Xz11/7 -----  
 Chr7\_137651301\_1097\_po\_C\_Pz13/ -----  
 Chr11\_29579197\_930\_po\_C\_Pz8/12 -----  
 Chr4\_117329205\_488\_po\_C\_Xz3/16 -----  
 Chr21\_38522185\_383\_po\_C\_Xz7/9 -----  
 Chr4\_70173370\_1049\_po\_C\_Xz11/8 -----  
 Chr4\_70022513\_788\_po\_C\_Kz10/12 -----  
 Chr14\_105225894\_1027\_po\_C\_Xz13 -----  
 Chr7\_119241536\_761\_po\_C\_Xz11/1 -----  
 ChrY\_22564970\_567\_po\_C\_Xz9/10 -----  
 Chr21\_14409346\_1477\_po\_C\_Pz5/6 -----  
 ChrX\_51259700\_1396\_po\_C\_Pz7/8 -----  
 Chr6\_64985396\_1041\_po\_C\_Xz11/1 -----  
 ChrY\_20355209\_659\_po\_C\_Xz7/11 -----  
 Chr3\_34567166\_523\_po\_C\_Xz8/6 -----  
 Chr3\_122072468\_245\_po\_C\_Xz9/9 -----  
 Chr11\_58788475\_541\_po\_C\_Xz8/22 -----  
 Chr6\_137421042\_373\_po\_C\_Xz6/9 -----  
 Chr4\_115910608\_550\_po\_C\_Pz8/12 -----  
 ChrY\_13743185\_977\_po\_C\_Xz14/8 -----  
 HERV15 -----  
 ChrX\_117198092\_983\_po\_C\_Xz8/8 -----  
 Chr19\_21166030\_1412\_po\_C\_Xz9/1 -----  
 Chr19\_21213743\_913\_po\_C\_Xz14/1 -----  
 Chr19\_15957774\_569\_po\_C\_Xz8/10 -----  
 Chr11\_77508681\_297\_po\_C\_Xz19/1 -----  
 Chr13\_98250769\_738\_po\_C\_Xz7/13 -----  
 Chr6\_39968183\_513\_po\_C\_Pz10/9 -----  
 Chr15\_66867263\_645\_po\_C\_Xz11/1 -----  
 HERV18\_polputein -----  
 HERVIP10FH\_polputein -----  
 MER66\_polputein -----

TKAFLLYVHARKGIATGLLVQTLGSWYLPVAYLSKRQDLVAMGWPPVSGI

HERVI\_polputein -----WRLTVSTPHQ-----VRAILNKKK-----  
 HERVIP10F\_polputein -----GKLTVSTPHQ-----VRTILNQRA-----  
 HERVadp\_AC005741 -----GALIVSTPHQ-----VRNILNZKA-----  
 HERV-PT47D -----ANFLCFLVET-----GFHRVSQDG-----  
 HERV\_W\_chr6\_141432567\_ERV9\_lik -----KDLTGWTTTHDVNG-----ILGA-----  
 ERV9\_PH1\_RT -----KDLT-STTYDVNG-----ILGA-----  
 Chr13\_54564403\_572\_po\_C\_Yz7/14 -----DLTVWTSHDVNS-----IHSA-----  
 HERV\_Y\_chr12\_51022911\_pol -----RDLTVWTSHDMNG-----ILTA-----  
 HERV17\_polputein -----RDLTVWTSHDVNG-----ILTA-----  
 HERV\_W\_chr7\_9105739\_syncytin\_p -----RDLTVWTSHDVNG-----ILTA-----  
 HERV9\_polputein -----KDLTVWTTTHVNG-----ILGA-----  
 HUERS-P3\_polputein -----NDLTVYTPHNVAG-----LLSS-----  
 ERVfrd\_AC004022 -----QSIWLLMSHQIDP-----LLNL-----  
 PRIMA41\_polputein -----QHLEVLTPHQVQG-----VLEA-----  
 HERV\_H\_RGH1\_pol -----  
 HERVHRGH2\_pol -----AQLILYSSSHNFQN-----LFSSS-----  
 HERV\_H48I\_polputein -----ANLTVYSTHNIKD-----MLAHR-----  
 HERV\_H\_RTVLH2\_pol -----VQLTLYISHNFQN-----LFSSS-----  
 HERVVFH21\_pol -----QNTTVYSPHNLQD-----LLSSR-----  
 HERVRblike\_chr4\_109047953 -----QPTMISVPLSLG-----VVRT-----  
 ChrY\_13790029\_693\_po\_C\_Xz12/11 -----QNFTLMAPHA-----IEILLPSAS-----  
 HERVS71\_polputein -----QNLTLMAPHA-----IETLLQRRS-----  
 BaEV\_M7\_pol -----QPLTVITPHT-----LEAIVRQPP-----  
 HERVR\_polputein -----QPLTVITPHT-----LEAIVRQPP-----  
 AKR\_MLV\_MLOCG\_RT -----QPLVILAPHA-----VEALVKQPP-----  
 GaLV\_pol -----QNVTVIASHS-----LESIVRQPP-----  
 Chr3\_158587414\_1662\_po\_C\_Ez10/ -----QNLNIKVPHA-----VVTLMNTKG-----  
 Chr3\_79627623\_1138\_po\_C\_Ez4/7 -----QNLNIKAPHA-----MVTLMNTKG-----  
 Chr19\_20477244\_1350\_po\_C\_Ez10/ -----PNLNIS-PHA-----VVTLMNTKG-----  
 Chr5\_111890459\_1626\_po\_C\_Ez10/ -----QNLNIKAPHA-----VVTLMNTKG-----  
 ChrX\_48766518\_1600\_po\_C\_Ez6/3 -----QNLNIKAPHA-----VVTLMNTKG-----  
 ChrX\_152580713\_1572\_po\_C\_Ez10/ -----QNLNIKALHA-----VVTLMNSKG-----  
 ChrX\_139287533\_1154\_po\_C\_Xz8/4 -----QNLNIKAPHA-----VVTLMNTKG-----  
 Chr2\_52615786\_912\_po\_C\_Xz11/5 -----QNLNIKAPHA-----VLTLTNTKG-----  
 HERV-E\_4\_1 -----QNLNIKDPHA-----VVTLMNTRG-----  
 ChrY\_21962399\_1137\_po\_C\_Xz13/9 -----QNLNIKAPHA-----VVTLMNTKK-----  
 ChrY\_8634032\_950\_po\_C\_Xz14/10 -----QNLNEKAPSV-----VT-LMNTKV-----  
 Chr3\_126735360\_997\_po\_C\_Xz5/10 -----QNLNIKASRA-----VVTLMNTKG-----  
 Chr3\_126713203\_958\_po\_C\_Xz7/8 -----QNLNIKASRA-----VVTLMNTKG-----  
 Chr3\_75226118\_977\_po\_C\_Xz8/9 -----QNLDIKSSRA-----VVTLMNTKG-----

Chr7\_6629919\_827\_po\_C\_Xz8/7 -----QNLNRKASRA-----VVTLMNTKG---  
Chr4\_9166812\_811\_po\_C\_Xz8/10 -----QNLNIKASHA-----VVTLMNAKG---  
Chr12\_8478642\_834\_po\_C\_Xz12/7 -----QNLNIKASRA-----VVTLMNTKG---  
Chr10\_15187175\_787\_po\_C\_Xz11/5 -----QNLNIKASRA-----VVTLMNTKG---  
Chr11\_71819740\_854\_po\_C\_Xz11/9 -----QKLNIKASRA-----VVTLMNTKG---  
Chr11\_71519974\_886\_po\_C\_Xz13/9 -----QNLNIKASHA-----VVTLMNTKG---  
Chr8\_7271441\_969\_po\_C\_Xz10/6 -----RNLNIKASRA-----VV--MNTKG---  
Chr8\_11770066\_826\_po\_C\_Xz9/8 -----QSLNINASHS-----VVTLMSSKG---  
Chr4\_4128362\_651\_po\_C\_Xz7/11 -----QNLNRKAPHA-----VVTLMNTKG---  
Chr14\_50203955\_850\_po\_C\_Xz10/8 -----QNLNTKAPHA-----VVTLMNTKG---  
Chr14\_50205291\_837\_po\_C\_Xz10/8 -----QNLNTKAPHA-----VVTLMNTKG---  
Chr7\_6597120\_842\_po\_C\_Xz7/7 -----QNLNRKAPHA-----VVTLMNTKG---  
Chr11\_71544658\_783\_po\_C\_Xz8/13 -----QNLNRKAPHT-----VVTLMNTKG---  
Chr11\_67999520\_760\_po\_C\_Xz8/8 -----QNLNRKAPHA-----VVTLMNIKG---  
Chr3\_75461975\_796\_po\_C\_Xz7/9 -----QNLNIKASHA-----VVTLMNTKG---  
Chr12\_52228939\_692\_po\_C\_Xz3/10 -----QNLNIKAPHA-----VLTLMNTKG---  
Chr10\_15211234\_286\_po\_C\_Xz11/1 -----ZNLTEKAPHA-----VVTLMNTKG---  
Chr12\_100973302\_945\_po\_C\_Xz12/ -----QNLNIKAPHA-----VVTLVNTKG---  
Chr19\_9685420\_817\_po\_C\_Xz6/10 -----QNLNINVPHT-----VVTLMNTKG---  
Chr13\_40936820\_719\_po\_C\_Xz9/10 -----QNLNIKASHA-----VVTLMDTKG---  
Chr7\_63858202\_1754\_po\_C\_Rz12/9 -----QQLTIQVPHA-----VITLMDQRE---  
ERV3\_chr7q21\_AC073210\_polputei -----QQLTIQVPHA-----VITLMDQRE---  
Chr6\_110218096\_843\_po\_C\_Xz16/8 -----QLTIWVLHS-----IITLMDQRG---  
Chr6\_110214535\_786\_po\_C\_Xz16/8 -----QLTIWVLHS-----IITLMDQRG---  
ChrY\_3018841\_881\_po\_C\_Rz9/12 -----QQLTPHS-----VITLMDQRG---  
ChrX\_86876098\_639\_po\_C\_Xz7/8 -----QLTPHS-----VMTLMDQRG---  
Chr14\_68899917\_965\_po\_C\_Xz6/8 -----QQLTIQVPHL-----VVTLMDQRR---  
ChrY\_23874437\_661\_po\_C\_Xz15/9 -----QQLTIGIPQS-----VLTLMZTA---  
ChrY\_27518418\_649\_po\_C\_Xz15/9 -----QQLTIGIPQS-----VLTLMZTA---  
ChrY\_25016892\_657\_po\_C\_Xz13/12 -----QQLTIGIPQS-----VLTLMZTA---  
ChrY\_19932937\_520\_po\_C\_Xz10/14 -----QQLTIQVPHS-----VLTLMDDRA---  
ChrY\_20104614\_518\_po\_C\_Xz10/14 -----QQLTIQVPHS-----VLTLMDDRA---  
Chr19\_58660155\_598\_po\_C\_Xz21/1 -----QQLTVVPHZ-----VITLMDQRR---  
Chr19\_58621153\_500\_po\_C\_Xz21/1 -----QQLTVVPHS-----VITLMDQRR---  
Chr7\_139686987\_710\_po\_C\_Xz11/7 -----QQLTIWVLHSVQQLSIWVLHSVITSIDQRR---  
Chr7\_137651301\_1097\_po\_C\_Pz13/ -----QQLTIQVLS-----VITLMDQRW---  
Chr11\_29579197\_930\_po\_C\_Pz8/12 -----QQLTI-VPYL-----VIILMDQRG---  
Chr4\_117329205\_488\_po\_C\_Xz3/16 -----QQLTIQVPHS-----VTTLMQRG---  
Chr21\_38522185\_383\_po\_C\_Xz7/9 -----QQLTIQLPHS-----VITLMDQRG---  
Chr4\_70173370\_1049\_po\_C\_Xz11/8 -----QQVTIQLLHS-----VITLMDQRG---  
Chr4\_70022513\_788\_po\_C\_Kz10/12 -----QQMTIQVPHS-----VVTLMDQRG---  
Chr14\_105225894\_1027\_po\_C\_Xz13 -----RQLIIQVPYS-----VITLMDKRG---  
Chr7\_119241536\_761\_po\_C\_Xz11/1 -----QQLTIWVPHL-----VITLMDQRG---  
ChrY\_22564970\_567\_po\_C\_Xz9/10 -----QKLIIRVPHT-----VIILMDQRG---  
Chr21\_14409346\_1477\_po\_C\_Pz5/6 -----QKLIQVPHT-----VVTLTEQRG---  
ChrX\_51259700\_1396\_po\_C\_Pz7/8 -----QKLIQVPHT-----VVTLMEQRG---  
Chr6\_64985396\_1041\_po\_C\_Xz11/1 -----QRLIICVPHM-----VITLLEQRG---  
ChrY\_20355209\_659\_po\_C\_Xz7/11 -----QRLIIQVPHT-----VITLMEQNG---  
Chr3\_34567166\_523\_po\_C\_Xz8/6 -----QSLIIWMPHA-----VVTLMEQKG---  
Chr3\_122072468\_245\_po\_C\_Xz9/9 -----QRLIIGAPHG-----RVTLMEQRG---  
Chr11\_58788475\_541\_po\_C\_Xz8/22 -----GSHYHMLAEDANKLTFGQRLIIWVPHT-----AITLMEQRG---  
Chr6\_137421042\_373\_po\_C\_Xz6/9 -----GMVIWVPHT-----VVTLMEQRG---  
Chr4\_115910608\_550\_po\_C\_Pz8/12 -----QRLIIRVPHT-----VITLMEQSG---  
ChrY\_13743185\_977\_po\_C\_Xz14/8 -----QKIIIFRPHT-----VVTLMGQRG---  
HERV15 -----QKIIIFRPHT-----VVTLMEQRG---  
ChrX\_117198092\_983\_po\_C\_Xz8/8 -----QKLIV-VPHA-----VVTLMEQRG---  
Chr19\_21166030\_1412\_po\_C\_Xz9/1 -----QKLKIGVPHA-----VVSLMDQRG---  
Chr19\_21213743\_913\_po\_C\_Xz14/1 -----QKLIQVPHT-----VVTLMEQRE---  
Chr19\_15957774\_569\_po\_C\_Xz8/10 -----ECSSVISAHC-----NLRLLGSRDSCV  
Chr11\_77508681\_297\_po\_C\_Xz19/1 -----QQLTIREPHS-----VITLMDRPSSCV  
Chr13\_98250769\_738\_po\_C\_Xz7/13 -----GGRRDVCNSA-----ALLFFTPLRCLG  
Chr6\_39968183\_513\_po\_C\_Pz10/9 -----QKLIQVLT-----VITLMDQREHHZ  
Chr15\_66867263\_645\_po\_C\_Xz11/1 -----HSLPAAELRK-----SGAHEPDTQAAA  
HERV18\_polputein -----WATVIVRMTYPIAG-----WVRSVWDPDD  
HERVIP10FH\_polputein -----GNLIVSTPHQVR-----TILSPKKKKK---  
MER66\_polputein -----KNLKEGSPES-----

HERVI\_polputein ---GRRLTDSRILK-YGAILLKKD-----  
HERVIP10F\_polputein ---GRWLTDSTRILK-YEAILLEKDDLTITDNLNPNAGF-LTGNPN---  
HERVadp\_AC005741 ---RTWLMSDQILK-YEAILVEZDDLVIITDCLNLASFLZKGEENK---  
HERV-PT47D ---LDLLTSZ-----  
HERV\_W\_chr6\_141432567\_ERV9\_lik -KZSLWLSDNHLLG-YQVLLLEGLVLQICTCV-ALNPATFLPE-DGKPI-  
ERV9\_PH1\_RT -KGSLWLSDNCLLR-YQALLLEGPVLQICTCM-ALNPATFLPE-DGEPI-  
Chr13\_54564403\_572\_po\_C\_Yz7/14 -KGDLWLSDNHLLK-YQ-LLEGPVLQRLTCA-TLNPATFLPD-NEEKI-  
HERV\_Y\_chr12\_51022911\_pol -KGDLWLSDNLLK-YQALLLEGPVLRLLCTCA-TLNZATCLPD-NEEKI-  
HERV17\_polputein -KGDLWLSDNRLK-YQALLLEGPVLRLLCTCA-TLNPATFLPD-NEEKI-

HERV\_W\_chr7\_9105739\_syncytin\_p -KGDWLSDNCLLK-CQALLLEGPVLRCTCA-TLNPATFLPD-NEEKI-  
HERV9\_polputein -KGILWLSDSYHLLR-YQALLLEGPVLIQISTCV-ALNPATFLPE-NGEPI-  
HUERS-P3\_polputein -RGSLWLTSDXLLK-YQALLLEXSXIQLKTC-HLNPDFTLFXE-ETGEP-  
ERVfrd\_AC004022 -KGPZWLTDNTLIK-YQVLLLENPQVTVEQCS-TINPALLPLPGDDNS-  
PRIMA41\_polputein -KRHRQRTGGHVYK-YQALLLN-PDITLKVQC-TLNPATYLP-PTGTL-  
HERV\_H\_RGH1\_pol -----GL-ITSPA-----  
HERVHRGH2\_pol -HLTHILSAPRLQ-IYTPFILP--ITII PGL-DFNPASHI ILDTIPDP-  
HERV\_H48I\_polputein -SVLSLISAPRLQ-LYALFIETPHITMLTSS-RLNPATLLPEATTAQDP-  
HERV\_H\_RTVLH2\_pol -HLMHYFLLPGS-----  
HERVVFH21\_pol -ALSSLP-PSRIQL-LHALFIKPKFSLAKSA-PLNPASLLPVSSSLPT-  
HERVRblike\_chr4\_109047953 -KGGYWLTAGRLGQ-YQAILLDDPAVKLQTTG-TLNPATLLPPTGESEEL-  
ChrY\_13790029\_693\_po\_C\_Xz12/11 ---GKWMSNARILQ-YQSLLLDQPLLTFSSIR-CLNPAAFLPDPNF---  
HERVS71\_polputein ---GKWMSNAHLLQ-YQSLLLDQPLWTFSPTR-CLNPATFLPDPDL---  
BaEV\_M7\_pol ---DRWITNARLTH-YQALLLDTDRVQFGPPV-TLNPATLLPVPEN---  
HERVR\_polputein ---DRWITNARLTH-YQALLLDTDRVQFGPPV-TLNPATLLPVPEN---  
AKR\_MLV\_MLOGC\_RT ---DRWLSNARMTH-YQALLLDTDRVQFGPPV-ALNPATLLPLPE---  
GaLV\_pol ---DRWMTNARMTH-YQSLLLN-ERVSFAPPA-VLNPATLLPVSESE---  
Chr3\_158587414\_1662\_po\_C\_Ez10/ ---HHWLTNARLTK-YQSLLCENPHITIEVCN-TLNPATLLPVZES---  
Chr3\_79627623\_1138\_po\_C\_Ez4/7 ---HHWLTNARLTK-YQSLLCESP-ITIKVCN-TLNPATLLPVPEN---  
Chr19\_20477244\_1350\_po\_C\_Ez10/ ---HHWLTNARLTK-YQSLLCENPHINIEVCN-TLNPATLLPVPES---  
Chr5\_111890459\_1626\_po\_C\_Ez10/ ---HHWLPNASLIK-YQSLLCENPRITIEVCN-TLNPA-LLPVSES---  
ChrX\_48766518\_1600\_po\_C\_Ez6/3 ---HHWLTNARLTK-YQSLLCENPHITIEVCN-TLNPATLLLVSES---  
ChrX\_152580713\_1572\_po\_C\_Ez10/ ---HHWLTNARLTK-YQSLLCENPRITIEVCN-TLNPATLLPVPEN---  
ChrX\_139287533\_1154\_po\_C\_Xz8/4 ---HHWLTNARLTK-YQSLVCENPRITIEVCN-TLNPATLLPVSDS---  
Chr2\_52615786\_912\_po\_C\_Xz11/5 ---HHWLTNARLTK-YQSLLCENPHITIEVCN-TLNPATLLPVPSE---  
HERV\_E\_4\_1 ---HHWLTNARLTK-YQSLLCENPHITIEVCN-TLNPATLLPVLVEI---  
ChrY\_21962399\_1137\_po\_C\_Xz13/9 ---HLLMNRNARLTK-YQISLVCENPCITIEVCN-TLNPATLLPVPSE---  
ChrY\_8634032\_950\_po\_C\_Xz14/10 ---HHWLNKALLTK-YQNLLENLHIDIEICN-TLNPATRLPVSER---  
Chr3\_126735360\_997\_po\_C\_Xz5/10 ---HNWLMNVRLLTK-YQTLAL-ENPCITIEVCN-TLHPASLLPVSES---  
Chr3\_126713203\_958\_po\_C\_Xz7/8 ---HHWLTNARLTK-YQTLLENPRITIEVCN-TLHPASLLPVSES---  
Chr3\_75226118\_977\_po\_C\_Xz8/9 ---HHWLTNARLTK-YQTLAL-ENPRITIEVCN-TLHPATLLPVPSE---  
Chr7\_6629919\_827\_po\_C\_Xz8/7 ---HHWLTNARLTK-YQTLLENPHITIEVCN-TLHPATLLPVPSE---  
Chr4\_9166812\_811\_po\_C\_Xz8/10 ---HHWLMNARLTK-YQSWLVCENPHITIEVCN-SLHPATLLPLSES---  
Chr12\_8478642\_834\_po\_C\_Xz12/7 ---HHWLMNARLTK-DQTLLENPHITIEVCN-TLHPATLLPVPSE---  
Chr10\_15187175\_787\_po\_C\_Xz11/5 ---HHWLTNARLTK-DETLLENPHITIEVCN-TLHPATLLPVPSE---  
Chr11\_71819740\_854\_po\_C\_Xz11/9 ---HHWLTNARLTK-YQTLLENPRITIEVCN-TLHPATLLPVPSE---  
Chr11\_71519974\_886\_po\_C\_Xz13/9 ---HHWLTNARLTK-YQTLLENPHITIEVCN-SLHPATLLPLSES---  
Chr8\_7271441\_969\_po\_C\_Xz10/6 ---RHWLTNARLTK-YQTLVCENPRITIEVCN-TLHPATLLPVPSE---  
Chr8\_11770066\_826\_po\_C\_Xz9/8 ---HHWLTNARLTK-YQTLLENPHITIEVCN-TLHPATLLPVPSE---  
Chr4\_4128362\_651\_po\_C\_Xz7/11 ---HHWLMNARLTK-YQTLLENPRITIEVCN-SLHPATLLLVSES---  
Chr14\_50203955\_850\_po\_C\_Xz10/8 -----IMS-----  
Chr14\_50205291\_837\_po\_C\_Xz10/8 -----IMS-----  
Chr7\_6597120\_842\_po\_C\_Xz7/7 ---HHWLTNARLTK-YQSLLCENPRITIEVCN-TLHPATLLPVPSE---  
Chr11\_71544658\_783\_po\_C\_Xz8/13 ---HHWLTNARLTK-YQTLLENPRITIEVCN---PATLLPLSES---  
Chr11\_67999520\_760\_po\_C\_Xz8/8 ---HHWLMNARLTK-YQSLLCENPRITIEVCN---PATLLPLSES---  
Chr3\_75461975\_796\_po\_C\_Xz7/9 ---HHWLTNARLTK-YQTLLENPRITIEVCN-TLHPATLLPVPSE---  
Chr12\_52228939\_692\_po\_C\_Xz3/10 ---HHWLTNARLTK-YQSLLCENPRITIEVCN-TLHPATLLPVPSE---  
Chr10\_15211234\_286\_po\_C\_Xz11/1 ---HHWLTNARLTK-YQS---ENPHITIEVCN-ILHPATLLPVPSE---  
Chr12\_100973302\_945\_po\_C\_Xz12/ ---HHWLTNARLTK-YQILLCKNPRITIEVCN-TLNPATLLPVPSE---  
Chr19\_9685420\_817\_po\_C\_Xz6/10 ---HHWLTNARLTK-YQSLLCENPHITIEVCN-TLSPATLLPVPSE---  
Chr13\_40936820\_719\_po\_C\_Xz9/10 ---HHWLTNARLTK-YQTLLENPCITIEVCN-TLHPATLLPVPSE---  
Chr7\_63858202\_1754\_po\_C\_Xz12/9 ---QHWSNPTMTZ-YQGLLENPRITIEVCN-TLNPATLLPVPK-----  
ERV3\_chr7q21\_AC073210\_polputei ---QHWSNPTMTZ-YQGLLENPRITIEVCN-TLNPATLLPVPK-----  
Chr6\_110218096\_843\_po\_C\_Xz16/8 ---HHWLLNPRMTQ-YQGLLENPHITIEVCN-TLNPANLLPVE-----  
Chr6\_110214535\_786\_po\_C\_Xz16/8 ---HHWLLNPRMTQ-YQGLLENPHITIEVCN-TLNPANLLPVE-----  
ChrY\_3018841\_881\_po\_C\_Rz9/12 ---HHWLSNLRMTQ-YQGLLENPHITIEVCN-TLNPATLLPVE-----  
ChrX\_86876098\_639\_po\_C\_Xz7/8 ---HHWLSNLRMTQ-YQGLLENPHITIEVCN-TLNPATLLPVE-----  
Chr14\_68899917\_965\_po\_C\_Xz6/8 ---HHWLSNPRMTQ-YQGLLENPHITIEVCN-TLNPATLLPVE-----  
ChrY\_23874437\_661\_po\_C\_Xz15/9 ---HYZLSNPRVTQ-YQGLICKNPDITIE IIN-TLNLATLLPVPK-----  
ChrY\_27518418\_649\_po\_C\_Xz15/9 ---HYZLSNPRVTQ-YQGLICKNPDITIE IIN-TLNLATLLPVPK-----  
ChrY\_25016892\_657\_po\_C\_Xz13/12 ---HYZLSNPRVTQ-YQGLICKNPDITIE IIN-TLNLATLLPVPK-----  
ChrY\_19932937\_520\_po\_C\_Xz10/14 ---PL-LSSPRMTR-YQVLLCKNSHITFKI IIN-TLKLAILLPIE-----  
ChrY\_20104614\_518\_po\_C\_Xz10/14 ---PL-LSSPRMTR-YQVLLCKNSHITFKI IIN-TLKLAILLPIE-----  
Chr19\_58660155\_598\_po\_C\_Xz21/1 ---HHZLSNLRMTQ-YQGLLEN-LHNFRVTN--PNPAILLPIE-----  
Chr19\_58621153\_500\_po\_C\_Xz21/1 ---HHZLSNLRMTQ-YQGLLENPYTTLNTHK--PNLAILLPIE-----  
Chr7\_139686987\_710\_po\_C\_Xz11/7 ---HHWLSNLRMTQ-YQGLLENPYSILETVN-SLNPATLLPVE-----  
Chr11\_29579197\_930\_po\_C\_Pz8/12 ---HHWLSNLRMTQ-YQGLLENPYSILETVN-TLNPATLLPVE-----  
Chr4\_117329205\_488\_po\_C\_Xz3/16 ---HHWLSNPRMTQ-YQGLLENPCLTLETVN-TLNLATLLPVE-----  
Chr21\_38522185\_383\_po\_C\_Xz7/9 ---HHWLSNPRMTQ-YQGLLENPHIALETVN-TLNPATLLPVE-----  
Chr4\_70173370\_1049\_po\_C\_Xz11/8 ---HHWLSNPRITQ-YQGLLENPCVLTLETVS-TLNPATLLPVE-----  
Chr4\_70022513\_788\_po\_C\_Kz10/12 ---HHWLSNPRITR-YQGLLENCLILIT-VN-TLNPATLLPVE-----  
Chr14\_105225894\_1027\_po\_C\_Xz13 ---HQWLNPRMIZ-YQELLENPCITLETVN-TLNLATLLPVE-----  
Chr7\_119241536\_761\_po\_C\_Xz11/1 ---HHWLSNPRMTQ-ZQGLLENPYSILETVN-TLNPATLLPVE-----  
ChrY\_22564970\_567\_po\_C\_Xz9/10 ---HYWLSNPRITDRYQGLLENYVI IGTVI-SLNPATLLPVE-----  
Chr21\_14409346\_1477\_po\_C\_Pz5/6 ---HHWLSNPRMLR-YQGLLENPYSILETVN-TLNPATLLPVE---YVE  
ChrX\_51259700\_1396\_po\_C\_Pz7/8 ---GHRWLSNPRMLR-YQWLLCENPYSILETVN-TLNLATLLPVE---YAE

Chr6\_64985396\_1041\_po\_C\_Xz11/1 ---YRLLSNPRMLR-YQGLFCENPYITLETVN-NLNPATLLPQI---WVE  
ChrY\_20355209\_659\_po\_C\_Xz7/11 ---HRWLSNP---Q-MEGLLCKNPIYITLETVN-TVNPATLLPKE---ZAE  
Chr3\_34567166\_523\_po\_C\_Xz8/6 ---HGWLSNTRMLR-YQGFLCENLYITLETVN-ALNPATLLPIE---WVE  
Chr3\_122072468\_245\_po\_C\_Xz9/9 ---HHWLSNPKMLR-YQGLLCENPYITLETVN-TLNPATLLPTE---WVE  
Chr11\_58788475\_541\_po\_C\_Xz8/22 ---HRWFSNPRIZK-YQGLLCENPYRTLETVN-TLNPAILLPE---WVE  
Chr6\_137421042\_373\_po\_C\_Xz6/9 ---HCWLSNPRMLR-YQGLLCEIPYLTLETMN-TLNPATLLLIE---WAE  
Chr4\_115910608\_550\_po\_C\_Pz8/12 ---HRWLSNPRMLR-YQGLLCENPYITLETIVN-TLNPATLLPIE---WVE  
ChrY\_13743185\_977\_po\_C\_Xz14/8 ---RRWLSHSRMLK-YQVLLCENLRVHYR-LN-ALNPATLLPVEEPPNWKH  
HERV15 ---RRWLSHSRMLK-YQGLLCENLRVHYR-LN-TLNPATLLPVEEPPDVKH  
ChrX\_117198092\_983\_po\_C\_Xz8/8 ---YGWLSNSRMLK-YQGLLCENPQITLENVN-TLNPATLLPVEEPPDKD  
Chr19\_21166030\_1412\_po\_C\_Xz9/1 ---HRCLSNFRMLK-CQSFLCKISRNTD-CK-FLEPSYLLPVEEPTLKN  
Chr19\_21213743\_913\_po\_C\_Xz14/1 ---HRWLSNSRMLK-YQGLLCANPDNIKT-VN-TLNAATLQPMEEPPDKD  
Chr19\_15957774\_569\_po\_C\_Xz8/10 S-----ASRVAGITGPCLACRSPHEEG---M-RVLTQLVATYP-----  
Chr11\_77508681\_297\_po\_C\_Xz19/1 PN-WGDEPLSPSPVSLVGVASHRHLQFPPFN-QLSEPLLLPVL-----  
Chr13\_98250769\_738\_po\_C\_Xz7/13 GE-KHKSGFRACPVIVPSLELHYDIDSFAHMF-FADLLIITLLE-----  
Chr6\_39968183\_513\_po\_C\_Pz10/9 VS-----SNPRMTRYQGGLCZNPHTIETVN-TLNLATLLPID-----  
Chr15\_66867263\_645\_po\_C\_Xz11/1 EE-ILSGDSSAMGSLASGPLGVRCTPTKQTG-YSPYKVLFRQP-----  
HERV18\_polputein -----WTAQTHFSK-VGRLLRTRSTLSTSPLAELQEVLPVVMQM-----  
HERVIP10FH\_polputein ---AKRZLTDSTRTLK-YKAILLEKDDLTLT TEN-SLNPAGFLTE-----  
MER66\_polputein -----ITTKMEGYPYRVLSTPTAVKLGQITSWVXLSRIKPVSE-----

HERVI\_polputein -----EEHLCLDLIDYQTKLRPDLGKIP-FKTGRHLFIDGSSQLIE  
HERVIP10F\_polputein -----LRREHTCLDLIDYHTKVRPDLGETP-FWTGRHLFIDGSSRVIE  
HERVadp\_AC005741 -----ETSDHNCNLNI EYQTKVRPDRFREP-LHV--VLFVDGSSZVID  
HERV-PT47D -----SARLGLPKVLGLHREPQRAP-PFVN---VDGVALG-  
HERV\_W\_chr6\_141432567\_ERV9\_lik -----EHDCQQIIVQTYATRDDLLEVLPLANPDNLNLYTDGSSFVEN  
ERV9\_PH1\_RT -----KHDCQQIIVQTYAARDLLEVLPLTNPDLNLYTDGSSFVEN  
Chr13\_54564403\_572\_po\_C\_Yz7/14 -----EHNCQQVITQTNSTRGDLLLEVPLTDPNLNLYTDGSSFVEK  
HERV\_Y\_chr12\_51022911\_pol -----EHNCQQVIAQTCAARGDLEVLPLTDPNLNLYSGSSFVEK  
HERV17\_polputein -----EHNCQQVIAQTCAARGDLEVLPLTDPNLNLYTDGSSFVEK  
HERV\_W\_chr7\_9105739\_syncytin\_p -----KHNCQQVISQTYATRGDLLLEVPLTDPNLNLYTDGSSFVEK  
HERV9\_polputein -----EHDCQQITVQTYATQDDLLEVLPLANPDNLNLYTDGSSFAEQ  
HUERS-P3\_polputein -----EHDCEQIVVQTYAAREDLRETPLENPDWLTFMDSGSSFVEQ  
ERVfrd\_AC004022 -----TYSCEEILNKIYASWEDLKDQPIDNPKIWFSDGSSFVRD  
PRIMA41\_polputein -----DHSCIQVMEQVYSSCPDLKDEPLDNPEVEWFTD GSSFVHQ  
HERV\_H\_RGH1\_pol -----KAGYAI VSS---TSII EAT-----  
HERVHRGH2\_pol -----HDCISLIHLTFTPPHISFCPVSHPDHTWFIDGS-----  
HERV\_H48I\_polputein -----THFCVNTVQTFLLIPFPNLTDQPLPDASF TWFDGSSFLHQ  
HERV\_H\_RTVLH2\_pol -----  
HERVFH21\_pol -----HSCDILLDHLQPHFPNISSEPLTNPNDQLFIDGSSSGPT  
HERVRblike\_chr4\_109047953 -----IHDCEVIDQVSSPDLKDTALSCANWTLFANKRSLVIN  
ChrY\_13790029\_693\_po\_C\_Xz12/11 -----TTPVDRDCQELLETTETGTZTDLQDMPLZ--TYTFMIDG-SSFLE  
HERVS71\_polputein -----TTPVHDCQELLETTZTGRPDLQDVP LKEVDSTLFTDS-SSFLE  
BaEV\_M7\_pol -----QSPHDCRQVLAETHGTREDLKDQELPDADHTWYTDG-SSYLD  
HERV9\_polputein -----QSPHDCRQVLAETHGTREDLKDQELPDADHTWYTDG-SSYLD  
AKR\_MLV\_MLOGC\_RT -----EQLQHNCLDLIAEAHGTRPDLTDQPLPDADHTWYTDG-SSLLQ  
GalV\_pol -----ATPVHRCSEILAEETGTRRDLDEDQPLPGVP-TWYTDG-SSFIT  
Chr3\_158587414\_1662\_po\_C\_Ez10/ -----PVKHNHVEVLD SAYSSRPDLRDPWASVDWELYVDWSSFINP  
Chr3\_79627623\_1138\_po\_C\_Ez4/7 -----PVKHNCVEVLDVAVSSRPDLWDQPWAAVDWELYMDRSSFINP  
Chr19\_20477244\_1350\_po\_C\_Ez10/ -----PVEHNCVEVLD SVYSSRPDLRDPWASVDLELYLDGSSFINP  
Chr5\_111890459\_1626\_po\_C\_Ez10/ -----LVKRNCVEVLD SVYSSRPDFWDQPWASVDWELYVDWSSFINP  
ChrX\_48766518\_1600\_po\_C\_Ez6/3 -----LVEHNCVEVLD SVYSSRPDLWDQPWASVDWELYMDGSSFINP  
ChrX\_152580713\_1572\_po\_C\_Ez10/ -----PVKHNCVEVLD SVYSSRPDLRDPWASADWELYMDGSSFINP  
ChrX\_139287533\_1154\_po\_C\_Xz8/4 -----PVEHDCVEALDSVYSSRPDLRDPRASVDWELYMDGSSFINP  
Chr2\_52615786\_912\_po\_C\_Xz11/5 -----VEHNCVEALDSVYSSRPDLRDHPWTSVDRELYVDGSSFNPN  
HERV-E\_4\_1 -----PVEHDCVEVLTQFTLG-----SVDWELYVDGSSFVNP  
ChrY\_21962399\_1137\_po\_C\_Xz13/9 -----VEHDCVEALDSVYSSRPDLZDHLWTVDZELCMDGSSFIIP  
ChrY\_8634032\_950\_po\_C\_Xz14/10 -----LIAYNCEVLD SVNSSRPDLRDPWASVDWELYMEGTSFINP  
Chr3\_126735360\_997\_po\_C\_Xz5/10 -----PVEPDCVEVLD SVDSRPDLRDPWASVDWELYVYVYDSSFFNP  
Chr3\_126713203\_958\_po\_C\_Xz7/8 -----TVEPDCVEVLD SVDSRPDLRDPWASVDWELYVYVYDSSFFNP  
Chr3\_75226118\_977\_po\_C\_Xz8/9 -----PVEPDCVEVLD SIDSSRPDLRDPWASVDWELYVDGSSFFNP  
Chr7\_6629919\_827\_po\_C\_Xz8/7 -----PVEPDYVEMLD SVASSRPDLWDQPWASVDWELYVDGSSFFNP  
Chr4\_9166812\_811\_po\_C\_Xz8/10 -----PVEPDCVEVLD SIDSSRPDLRDPWASVDWELYVDGSSFFNP  
Chr12\_8478642\_834\_po\_C\_Xz12/7 -----PVEPDCVEVLD SIDSSRPDLQDQPWASVDWELYADGNSFFNP  
Chr10\_15187175\_787\_po\_C\_Xz11/5 -----PVEPDCVEVLD SIDSSRPDRDQPWASVDWERYVDGSSFFNP  
Chr11\_71819740\_854\_po\_C\_Xz11/9 -----PVKPGCVEVLD SIDSSRPDLWDQPWASVDWELYLDGSSFFNP  
Chr11\_71519974\_886\_po\_C\_Xz13/9 -----PVEPDCVEVLD TIDSSRPDLRDPWASVDWELYVDGSSFFNP  
Chr8\_7271441\_969\_po\_C\_Xz10/6 -----PVEPDCVEVLD SIDSSRPDLRDPWASVDWEPHVDGSSFFNP  
Chr8\_11770066\_826\_po\_C\_Xz9/8 -----SAEPDCVEMLYSIDSRPDLRDPWASVDWEPYVDGSSFFNS  
Chr4\_4128362\_651\_po\_C\_Xz7/11 -----PVEPGCVEVLD TIDSSRPDLRGPWA-IDWELYVDGSSFFNP  
Chr14\_50203955\_850\_po\_C\_Xz10/8 -----PVEHDCVEVLD SVDSRPDLRDPWASVDWELZVDGSSFVNP  
Chr14\_50205291\_837\_po\_C\_Xz10/8 -----PVEHDCVEVLD SVDSRPDLRDPWASVDWELZVDGSSFVNP  
Chr7\_6597120\_842\_po\_C\_Xz7/7 -----PVEHDCVEVLD SVDSRPDLRDPWASVDWELYVHGSSLVNT  
Chr11\_71544658\_783\_po\_C\_Xz8/13 -----PVEHDCVEVLD SVDSRPDLRDPWASVDWELYVHGSSLVNT  
Chr11\_67999520\_760\_po\_C\_Xz8/8 -----PVEHDCVEVLD SVDSRPDFWDQPWASVDWELYVDGSSFFNP  
Chr3\_75461975\_796\_po\_C\_Xz7/9 -----PVQADCVEVLD SIDSSRPDLQDQPWASVDWELYVDGSSFFNA

Chr12\_52228939\_692\_po\_C\_Xz3/10  
 Chr10\_15211234\_286\_po\_C\_Xz11/1  
 Chr12\_100973302\_945\_po\_C\_Xz12/3  
 Chr19\_9685420\_817\_po\_C\_Xz6/10  
 Chr13\_40936820\_719\_po\_C\_Xz9/10  
 Chr7\_63858202\_1754\_po\_C\_Rz12/9  
 ERV3\_chr7q21\_AC073210\_polputei  
 Chr6\_110218096\_843\_po\_C\_Xz16/8  
 Chr6\_110214535\_786\_po\_C\_Xz16/8  
 ChrY\_3018841\_881\_po\_C\_Rz9/12  
 ChrX\_86876098\_639\_po\_C\_Xz7/8  
 Chr14\_68899917\_965\_po\_C\_Xz6/8  
 ChrY\_23874437\_661\_po\_C\_Xz15/9  
 ChrY\_27518418\_649\_po\_C\_Xz15/9  
 ChrY\_25016892\_657\_po\_C\_Xz13/12  
 ChrY\_19932937\_520\_po\_C\_Xz10/14  
 ChrY\_20104614\_518\_po\_C\_Xz10/14  
 Chr19\_58660155\_598\_po\_C\_Xz21/1  
 Chr19\_58621153\_500\_po\_C\_Xz21/1  
 Chr7\_139686987\_710\_po\_C\_Xz11/7  
 Chr7\_137651301\_1097\_po\_C\_Pz13/13  
 Chr11\_29579197\_930\_po\_C\_Pz8/12  
 Chr4\_117329205\_488\_po\_C\_Xz3/16  
 Chr21\_38522185\_383\_po\_C\_Xz7/9  
 Chr4\_70173370\_1049\_po\_C\_Xz11/8  
 Chr4\_70022513\_788\_po\_C\_Kz10/12  
 Chr14\_110325894\_1027\_po\_C\_Xz13/13  
 Chr7\_119241536\_761\_po\_C\_Xz11/1  
 ChrY\_22564970\_567\_po\_C\_Xz9/10  
 Chr21\_14409346\_1477\_po\_C\_Pz5/6  
 ChrX\_51259700\_1396\_po\_C\_Pz7/8  
 Chr6\_64985396\_1041\_po\_C\_Xz11/1  
 ChrY\_20355209\_659\_po\_C\_Xz7/11  
 Chr3\_34567166\_523\_po\_C\_Xz8/6  
 Chr3\_122072468\_245\_po\_C\_Xz9/9  
 Chr11\_58788475\_541\_po\_C\_Xz8/22  
 Chr6\_137421042\_373\_po\_C\_Xz6/9  
 Chr4\_115910608\_550\_po\_C\_Pz8/12  
 ChrY\_13743185\_977\_po\_C\_Xz14/8  
 HERV15  
 ChrX\_117198092\_983\_po\_C\_Xz8/8  
 Chr19\_21166030\_1412\_po\_C\_Xz9/1  
 Chr19\_21213743\_913\_po\_C\_Xz14/1  
 Chr19\_15957774\_569\_po\_C\_Xz8/10  
 Chr11\_77508681\_297\_po\_C\_Xz19/1  
 Chr13\_98250769\_738\_po\_C\_Xz7/13  
 Chr6\_39968183\_513\_po\_C\_Pz10/9  
 Chr15\_66867263\_645\_po\_C\_Xz11/1  
 HERV18\_polputein  
 HERVIP10FH\_polputein  
 MER66\_polputein

-----PVGHDCVEVFDSDVSSRSLDRDQPWASVDWELHVDGSSFFINL  
 -----PVKHDCVEMLDSDVSSRPDLRVQPWASVDWELZVDGSSFFIIP  
 -----PVEHNCVEVLDVSVSSRPDLQDQSZASVDZDLYDRSSFINP  
 -----PVKRNCEVLDVSVSSRPDLZDQPWASVDWELYMDGSSFINP  
 -----PVEPDCVEVLDVSDVSSRPDLRDPWASVDWELSDVGSSSFFNP  
 ---PG---ITFRDCGN-VDEVFSSRGDLTDQPFKDPDVEYFIDG-SSFVL  
 ---PG---ITFRDCGN-VDEVFSSRGDLTDQPFKDPDVEYFIDG-SSFVL  
 ---PG---APLHNCVEIVDEVFLSWGDLMDHPLRVDPVEYFTDG-SSFIL  
 ---PG---APLHNCVEIVDEVFLSWGDLMDHPLRVDPVEYFTDG-SSFIL  
 ---TG---APLHDCVETVDEVFSSWGDLDTCPLGDDPVEYFTDR-SSFIL  
 ---TG---APLHDCVETVDEVFSSWGDLDTCPLGDDPVEYFTDR-SSFIL  
 ---G---IPLHDCVETVDEVFSSQGDLDTDQPLRDPDVEYFTDG-STFML  
 ---PG---VLLHDSVETVDDVFSQKDLEIEQLWDDPDGKY-----IL  
 ---PG---VLLHDSVETVDDVFSQKDLEIEQLWDDPDGKY-----IL  
 ---PG---VLLHDSVETVDDVFSQKDLEIEQLWDDPDGKY-----IL  
 ---PG---VLLHDSVETVDDVFSQKDLEIEQLWDDPDGKY-----IL  
 ---PG---VLPFHDSMETVDTVLZIQRYLREQPLWNPVKCYTYR-SSFTL  
 ---PG---VLPFHDSMETVDTVLZIQRYLREQPLWNPVKCYTYR-SSFTL  
 ---QA---APLHNCVKTVDEVFPNEKDLTDRPLRDPDVKYFTGG-SSSVL  
 ---QA---APLHNCVKTVDEVFPNEKDLTDRPLRDPDVKYFTGG-SSSVL  
 ---PG---APLHDCVKTVDEVFSSZKDLMDQPLRDPDVEYFTDG-SSFVL  
 ---LEP---GGPLHCRVDTVGEVSSQKDLTHQPLKDPDVEYFTDG-SNFVL  
 ---LGP---GAPLHCCVDAVDEVFSSQRDLTDQPLRDPDVEYFTDG-SSFVL  
 ---PG---GAPLHDCIETVDEIFSSRGDLTDZTLRDPHVEYFTDG-SSFIL  
 ---L---GTPHLHDCVMVDEVFLSRGDLTDQPLRDPVVKZFTDG-SSFIL  
 ---SVP---GSPLHCZVDVDEVFSSQRDLTDRPLGDLDEIYFTDG-SSFIL  
 ---SMP---GSPLQCQCVVVEVFLSQRDLTDQPLGDDPDIGYFTDG-SSFIL  
 -----PSSLIC--DVADEVFSSQRDLTDRPLGDDPDIEYFTDG-SSFIR  
 ---L---GAPLHDCVETVDEVFSSQGDLDTDQTLREPGVEYFTDG-SCFIL  
 ---RPKDISIPYHCVDVDVEELFCSZKDLTDQPLVGPDVEYFMDG-SSFIS  
 HGKPPLCAPGYHCCVETVDEVFSSQKDLKQPLKDPDVEYFTDG-SSFIS  
 HGKPPLCAPGYHCCVETVDEVFSSRKLKQPLKDPDIEYFTDG-SSFIS  
 HGKPPLCGPYHCCVETVDEVFSSZKDLKQPLKYQDVEYFTDE-SSFIS  
 HGKPPLCGPEYHCCVETVDEVFSSNKLKDLKELPLQNPDLN--SDG-SSFIS  
 HGKS-RCVAQGITVLETVDEA---KDLKNQPLKDPDVEYFTDG-SSFVS  
 HGAP-LCGPGYHCCVETVDEVFSSQKDLTDZPLRDPDVKYFTDG-SSFIS  
 HGKPPLZGPGYHCCVETVDEVFSSREDLKDRPLRDPDVEYFTDE-SSFIS  
 HGKPPLCGPYHCCVETVDEVFSSZKDLKZPLKDPHVKYFADG-SSFIS  
 HGKPMLCGPGYDCCVEILDEVFSSRKDKQPLKDPDVEYFTDG-SSFIS  
 GGLPQCQWDLPHCCINMVDEVFLSWEDLRDTRLESVDVVEYFTDG-SSFIT  
 GGLPQCQWDLPHCCINMVDEVFLSWEDLRDTRLESVDVVEYFTDG-SSFIT  
 AGLPHSWQDLPHCCINMVVKVFSQEDLRDSPLESVDVIYFTDG-SSFIT  
 GGLPHCZQDSPLLHCIIQWTKCSRAR-ELRDTPLESPDVEYFTDG-SSFIT  
 GELPHCZQDPLHCCINTVGVKFSSQEDLRDTRLESVDVVEYFTDG-SSFIT  
 ---QGFKIWMNPTIPIRLPQHHLVCHQ----CLRHYLKLH-G-ECRGA  
 ---IGVRVSSKLTAAIAPSPSGGLLGIPREVIRLPRFRPYRM-G-PALGP  
 ---STTFLFAEIMNIIINKNZGNSEAGAG---AGPWCAECR-S-PGPTV  
 ---QKTLPHZYCVDIVEVDFSSZRNLKQDP--LGGPHVEYFMDG-PRFVS  
 ---PPIISQVGDLCGELGTLRRQALGAMQKVGWVWERM-PISLT  
 -----DKAMGPEAPLDPEPSPFKEGHPPIPDGAWYTDG-----S  
 -----DLNLYRTKVRPDLGNSLQDRTIDG-SSRVI  
 -----YESQAQKEDMTYICEPLRLPLPIZKNQHSARS-GNVAV

HERVI\_polputein  
 HERVIP10F\_polputein  
 HERVadp\_AC005741  
 HERV-PT47D  
 HERV\_W\_chr6\_141432567\_ERV9\_lik  
 ERV9\_PH1\_RT  
 Chr13\_54564403\_572\_po\_C\_Yz7/14  
 HERV\_Y\_chr12\_51022911\_pol  
 HERV17\_polputein  
 HERV\_W\_chr7\_9105739\_syncytin\_p  
 HERV9\_polputein  
 HUERS-P3\_polputein  
 ERVfrd\_AC004022  
 PRIMA41\_polputein  
 HERV\_H\_RGH1\_pol  
 HERVHRGH2\_pol  
 HERV\_H48I\_polputein  
 HERV\_H\_RTVLH2\_pol  
 HERVVFH21\_pol  
 HERVRblike\_chr4\_109047953  
 ChrY\_13790029\_693\_po\_C\_Xz12/11  
 HERVS71\_polputein  
 BaEV\_M7\_pol  
 HERVR\_polputein

GKRHNGYPVIDGEILYIRTESRKLPNNSWAQTCELFA-----LSQALK  
 GKRHNGYSVIDGETL-VEIESGKLPNSWSAQTCELFA-----LSQALK  
 GRRHSRYTVID-ENKHSLECEKGRPLPNGWLAQTCELHA-----LNQALN  
 -----VRTQEHSD-----LQQPVA  
 GIZREH-YAIVS--DV-----TVLS----QLAEF-----VALTQALE  
 GIRRLV-VTILE--SK-----PLPPGTSAQLAEL-----VALTWALE  
 GLZKAG-YAVVS--DNGILENNPLTPGTSAQLAEL-----IALTRALE  
 GLQKAG-YAVVS--DNGILESNPLTPGTSAQLAEL-----IALTRALE  
 GLRKAG-YAVVS--DNGILESNPLTPGTSAQLAEL-----IALTRALE  
 GLRKVG-YAVVS--DNGILESNPLTPGTSAQLAEL-----IALTWALE  
 GIZRAG-CDIVS--DVTVPESKPLPPGTSTQTEL-----VALTZALE  
 GIRKAG-YAVVT--LNNVIESAXLSPGTSAQLAEL-----IALTRALE  
 GTRYAG-YATES--HHQVETKALSPGTSVQLAEF-----ITLTRALK  
 GNGKAG-YAVVS--QHEVIESQALPASTSAQKAL-----IALIRALQ  
 -----ALPP-----STTS-----QQAEL-----VTLTQALT  
 -----STRP--NRHSPAK-----AGYAEL-----VALIQALT  
 GRRHAGYAVISV--HTHTIEANPLPLGTTSSQKAL-----IALTQALT  
 -----FS--CTHS-----LSPITIT  
 GSPKIAGYAVVS--LDQVIEAKPLPPGTSSQKAL-----IALTRALT  
 GRRNAA-YAVVS--SEG-IEARTLPTGTSAQKAS-----IALTRALQ  
 QGVQKIGAAFTT--ETDVLWSQVLPAGTSAQKALIA-----LTQAVZ  
 QGVGKAGAAVTM--ETDVLWAQALPAGTSAQKALVT-----FTQALZ  
 SGTTRAGAAVVD--GHNTIWAQSLPPTGSAQKALIA-----LTKALE  
 SGTTRAGAAVVD--GHNTIWAQSLPPTGSAQKALIA-----LTKALE

AKR\_MLV\_MLOGC\_RT  
GalV\_pol  
Chr3\_158587414\_1662\_po\_C\_Ez10/  
Chr3\_79627623\_1138\_po\_C\_Ez4/7  
Chr19\_20477244\_1350\_po\_C\_Ez10/  
Chr5\_111890459\_1626\_po\_C\_Ez10/  
ChrX\_48766518\_1600\_po\_C\_Ez5/3  
ChrX\_152580713\_1572\_po\_C\_Ez10/  
ChrX\_139287533\_1154\_po\_C\_Xz8/4  
Chr2\_52615786\_912\_po\_C\_Xz11/5  
HERV-E\_4\_1  
ChrY\_21962399\_1137\_po\_C\_Xz13/9  
ChrY\_8634032\_950\_po\_C\_Xz14/10  
Chr3\_126735360\_997\_po\_C\_Xz5/10  
Chr3\_126713203\_958\_po\_C\_Xz10/6  
Chr3\_75226118\_977\_po\_C\_Xz8/9  
Chr7\_6629919\_827\_po\_C\_Xz8/7  
Chr4\_9166812\_811\_po\_C\_Xz8/10  
Chr12\_8478642\_834\_po\_C\_Xz12/7  
Chr10\_15187175\_787\_po\_C\_Xz11/5  
Chr11\_71819740\_854\_po\_C\_Xz11/9  
Chr11\_71519974\_886\_po\_C\_Xz13/9  
Chr8\_7271441\_969\_po\_C\_Xz10/6  
Chr8\_11770066\_826\_po\_C\_Xz9/8  
Chr4\_4128362\_651\_po\_C\_Xz7/11  
Chr14\_50203955\_850\_po\_C\_Xz10/8  
Chr14\_50205291\_837\_po\_C\_Xz10/8  
Chr7\_6597120\_842\_po\_C\_Xz7/7  
Chr11\_71544658\_783\_po\_C\_Xz8/13  
Chr11\_67999520\_760\_po\_C\_Xz8/8  
Chr3\_75461975\_796\_po\_C\_Xz7/9  
Chr12\_52228939\_692\_po\_C\_Xz3/10  
Chr10\_15211234\_286\_po\_C\_Xz11/1  
Chr12\_100973302\_945\_po\_C\_Xz12/  
Chr19\_9685420\_817\_po\_C\_Xz6/10  
Chr13\_40936820\_719\_po\_C\_Xz9/10  
Chr7\_63858202\_1754\_po\_C\_Rz12/9  
ERV3\_chr7q21\_AC073210\_polputei  
Chr6\_110218096\_843\_po\_C\_Xz16/8  
Chr6\_110214535\_786\_po\_C\_Xz16/8  
ChrY\_3018841\_881\_po\_C\_Rz9/12  
ChrX\_86876098\_639\_po\_C\_Xz7/8  
Chr14\_68899917\_965\_po\_C\_Xz6/8  
ChrY\_23874437\_661\_po\_C\_Xz15/9  
ChrY\_27518418\_649\_po\_C\_Xz15/9  
ChrY\_25016892\_657\_po\_C\_Xz13/12  
ChrY\_19932937\_520\_po\_C\_Xz10/14  
ChrY\_20104614\_518\_po\_C\_Xz10/14  
Chr19\_58660155\_598\_po\_C\_Xz21/1  
Chr19\_58621153\_500\_po\_C\_Xz21/1  
Chr7\_139686987\_710\_po\_C\_Xz11/7  
Chr7\_137651301\_1097\_po\_C\_Pz13/  
Chr11\_29579197\_930\_po\_C\_Pz8/12  
Chr4\_117329205\_488\_po\_C\_Xz3/16  
Chr21\_38522185\_383\_po\_C\_Xz7/9  
Chr4\_70173370\_1049\_po\_C\_Xz11/8  
Chr4\_70022513\_788\_po\_C\_Kz10/12  
Chr14\_105225894\_1027\_po\_C\_Xz13  
Chr7\_119241536\_761\_po\_C\_Xz11/1  
ChrY\_22564970\_567\_po\_C\_Xz9/10  
Chr21\_14409346\_1477\_po\_C\_Pz5/6  
ChrX\_51259700\_1396\_po\_C\_Pz7/8  
Chr6\_64985396\_1041\_po\_C\_Xz11/1  
ChrY\_20355209\_659\_po\_C\_Xz7/11  
Chr3\_34567166\_523\_po\_C\_Xz8/6  
Chr3\_122072468\_245\_po\_C\_Xz9/9  
Chr11\_58788475\_541\_po\_C\_Xz8/22  
Chr6\_137421042\_373\_po\_C\_Xz6/9  
Chr4\_115910608\_550\_po\_C\_Pz8/12  
ChrY\_13743185\_977\_po\_C\_Xz14/8  
HERV15  
ChrX\_117198092\_983\_po\_C\_Xz8/8  
Chr19\_21166030\_1412\_po\_C\_Xz9/1  
Chr19\_21213743\_913\_po\_C\_Xz14/1  
Chr19\_15957774\_569\_po\_C\_Xz8/10  
Chr11\_77508681\_297\_po\_C\_Xz19/1  
Chr13\_98250769\_738\_po\_C\_Xz7/13

EGQRKAGAAVTT--ETEVIWAKALPAGTSAQRAELIA-----LTQALK  
EGKRRAGAPIVD--GKRTVWASSLPEGTSAQKAEELVA-----LTQALR  
QGERCAGYAVVT--LDAVIEAKPLPQGTSAQKTELIA-----LTRAQE  
QGERCAGYAMVT--LDAVTEAKPLPQGTSAQKAEELTA-----LTQALE  
QGERCAGYAVVT--LDAVIEETKPLPQGTSAQKAEELTA-----LTRALE  
ZGERCAGYAVVT--LDAAIETKLLPQGTSAQKPELIA-----LTRALE  
QGERCAGYAVVT--LDAVIEAKPLPQGTSAQKAEELIA-----LTRALE  
HGERCAGYAVVT--LDAVHZSQTITATGTSQKAEELIA-----LTRALE  
QGESCAGYVVVT--LDDIIIEAKPLPQGTSAQKAEELIA-----LTRALE  
PGERCAGYAVVT--LDAVVEAKSLPKGTZAKKAKLIA-----LIRASE  
QGERCAGYAVVT--LDTVAEARSFPPQGTSTQKAEELIA-----LIRALE  
QGERCAGYAVVTRTLKCVIEAKSLPQGTSAQMTelta-----LIQALE  
QGZRCZYVVVT--LDTVVEAKPFPQDTSAQKAEELIAZ-----ITWALE  
QGERGAGYAVIT-LDP-VVEARSLPQTSAQKAEELIA-----FIRALE  
QRRERAGYAVIT-LDT-VFEARSLPQATSQKAEELIA-----FIRALE  
QGERGAGYAVGT-LDT-VVETRSPLPQATSQKAEELIA-----FIRALE  
QGERGAGYAVIT-LDT-VVEARSLPQATSQKAEELIA-----LIRALE  
ZGERGAGYAVIT-LDT-VVEARSLPQATSTQKAEELIA-----FIRALE  
QGERCAGYAVIT-LGT-VVEAGZLPQATSQKAEELIA-----FIRALE  
QGERGAGYAVIT-LGT-VVEARSLPQATSQKAEELIA-----FIRALE  
Q--RGGYAGVT-LDT-VVEATSLPQATSQKAEELIA-----FIRALE  
QGERGAGYAVIT-LDT-VVEARSLPQGTSAQKAEELIA-----FIRALE  
QGERGAGYAVIT-LDT-VVETRSPLPQATSQKAEELNA-----FIWALE  
QGERGSGYAVIT-LDT-VVEARSLPQATSQKAEELIA-----FIGALE  
QGERGAGZAVIT-LDT-VVEARSLPQATSQKAEELIA-----FIRALE  
HGERGAGYSVVT-LDTQQLEARSPLPQATSQZAEELIA-----LIRALE  
HGERGAGYSVVT-LDTQQLEARSPLPQATSQZAEELIA-----LIRALE  
QKRGAGYAVVT-LDT-VVEARSLPQATSQKAEELIA-----FIRALE  
K-EREVQGMRDN-LDT-VVEARSLPQGTSAQKAEELIA-----FIRALE  
QGERGAGYAVIT-LDT-VVEARSLPQATSQKAEELIA-----FIWALE  
QKRGAGYAVVT-DTV--VEARSLPQATSQKAEELIA-----LIRALE  
QGERCAGYAVVT-LYT-VVEARSLPQGTSAQKAEPIA-----LIWALE  
QGERGAGYAVVT-LDT-VVEARSLPQATS-QKAEELIA-----FIQALE  
QGERCAGYAVVT-LNA-VIEAKPLPQGNSAQKAEELIA-----LTQVLE  
QGERGAGYAVVT-LDA-VIEAKPLPQGVSAQKAEELI-----LTRALE  
QGERGAGYAVVT--LDTVVEARSLPQATSQKAEELIA-----FIQALE  
EGVCWAGZAVVT--LDSVVEAZPQAGTSAQKAEEL-AA-----LTRVLQ  
EGVCWAGZAVVT--LDSVVEAZPQAGTSAQKAEEL-AA-----LTRVLQ  
EGVHWAQYVVVT--LDLVEAQPLPRTSAQKAEEL-IS-----LTRACL  
EGVHWAQYVVVT--LDLVEAQPLPRTSAQKAEEL-IS-----LTRACL  
EGVQWAGYVVVT--LDSVVEAQPLPTEMLTQKAEEL-IA-----LTRALL  
EGVQWAGYVVVT--LDSVVEAQPLPTEMLTQKAEEL-IA-----LTRALL  
EGVVRQAGYAVVT--LDSVTEAQPLPTSTQKAEEL-ID-----LTRALL  
KGVRETGYAVIT--LDSVVEAQ--PRTSAQKAEEL-IA-----LMR-AL  
KGVRETGYAVIT--LDSVVEAQ--PRTSAQKAEEL-IA-----LMR-AL  
KGVRETGYAVIT--LDSVVEAQ--PRTSAQKAEEL-IA-----LMR-AL  
KGVQQAGYAVMI--LDSVVEAQPLPRTMSAQKAEEL-IA-----LET-IL  
KGVQQAGYAVMI--LDSVVEAQPLPRTMSAQKAEEL-IA-----LET-IL  
EEFGHAGYAVVT--SDSVVEAQPLPTGTSAQKAEEL-IA-----LTRALL  
EEFGHARYTVVT--SDSVVEAQPLPTGTSAQKAEEL-IA-----LTRALL  
EGVQHAGYAVVT--LDSVVEAQSLPTGTSAQKAEEL-IA-----PTRALL  
EGVVRQAGYAVVT--GLSGRGSV-SAHRTSAQKADL-IA-----LTRALL  
EGVZQARYAVVT--LDSVIEAS-LSTGTSAHKAEEL-IA-----LTRALW  
EEVCPAGYAVVT--LDSVVEAQPLPTGTSAQNAEL-IA-----LIKALL  
EGVRWAGYAVVT--LDSVIEAQPLPTGASQKAEEL-MA-----LTRALL  
EGVHQTQAGYAVVT--LDSVAEQSLSTGTSAQKAKL-IG-----LIRALW  
EGVVRQAGYAVVT--LDSVVEAKSLPTGSSPQKAEEL-IA-----LTRALQ  
G-ARRAGYAVVT--LDSVAEASLPTGTSAQKAEEL-IA-----LTRAHW  
GGVRZAGYMVVT--LDSVVEAQPLPT-----EAEEL-IA-----L TZALL  
EGIQZPAYTVVT--WDSVVEAQPLPARKSAQKAEEL-TA-----PTRALL  
KGVKKARFAIVT--LSSVAKARPLAVGTSAQKA---IA-----LTRALL  
EGIRKAGYAVAT--LNSVAEACPLPVGTSAQKAEEL-IA-----LIRALL  
EGVRWAGYAVVT--LNSVAEACPLLVGTSAQRAEL-IA-----LTRTLL  
EGVRPAGHAVVT--LNSVAEVCPLTVGSSAQRAEL-IVSLELILLTRALL  
EG-RLAGYAVVT--LNSVAKACPLPVGTLAQRAEL-IA-----LNKTLL  
EGVRRAGCAVVT--LNSVAEARPLPVGTLAQRAEL-IA-----LTRALL  
EGIRWAGYAVVT--LNSVAAGLPLPVRTLAQRAEL-IA-----LTRALL  
KGISWAGYAVVT--LNSAAETCPLPAQTSAQRAEI-IA-----VTRVLL  
EGVRWAGYAVVT--LNSVSEAHPLPVGTLAQIAEL-IA-----LTRALL  
DGVZYAGYKVVVT--QHSVVEAQALTSGTSAQRAEL-IA-----LTRALL  
DGVZYAGYAVVT--QHSVVEAQALPSGTSAQKAEEL-IA-----LTRALL  
DGVRYAGYAVVT--QHSVVEAQALPSGTSAKAEEL-IA-----LTRALL  
NGVRYAGYTVVT--QRSVVEAQALTSGTSAQKAEELIIA-----LSRALL  
HGVZYGYAVVT--QHLVVEAQALPSGTSTRKAEEL-IT-----LTRALL  
SEACKPLPKLL--CGRCS-IQALPSCVT-----  
KTLPLDSZSALFL--ESSCSSQDLRLRCVGVVLGHG-----ELISPLG  
VSLYFVSVSISF--LSLSSHPTRNTHVWRGR--PPL-----QVSKKKA



Chr6\_39968183\_513\_po\_C\_Pz10/9  
Chr15\_66867263\_645\_po\_C\_Xz11/1  
HERV18\_polputein  
HERVIP10FH\_polputein  
MER66\_polputein

HERVI\_polputein  
HERVIP10F\_polputein  
HERVadp\_AC005741  
HERV-PT47D  
HERV\_W\_chr6\_141432567\_ERV9\_lik  
ERV9\_PH1\_RT  
Chr13\_54564403\_572\_po\_C\_Yz7/14  
HERV\_Y\_chr12\_51022911\_pol  
HERV17\_polputein  
HERV\_W\_chr7\_9105739\_syncytin\_p  
HERV9\_polputein  
HUERS-P3\_polputein  
ERVfrd\_AC004022  
PRIMA41\_polputein  
HERV\_H\_RGH1\_pol  
HERVHRGH2\_pol  
HERV\_H48I\_polputein  
HERV\_H\_RTVLH2\_pol  
HERVHFH21\_pol  
HERVrlike\_chr4\_109047953  
ChrY\_13790029\_693\_po\_C\_Xz12/11  
HERVS71\_polputein  
BaEV\_M7\_pol  
HERVR\_polputein  
AKR\_MLV\_MLOCG\_RT  
GaLV\_pol  
Chr3\_158587414\_1662\_po\_C\_Ez10/  
Chr3\_79627623\_1138\_po\_C\_Ez4/7  
Chr19\_20477244\_1350\_po\_C\_Ez10/  
Chr5\_111890459\_1626\_po\_C\_Ez10/  
ChrX\_48766518\_1600\_po\_C\_Ez6/3  
ChrX\_152580713\_1572\_po\_C\_Ez10/  
ChrX\_139287533\_1154\_po\_C\_Xz8/4  
Chr2\_52615786\_912\_po\_C\_Xz11/5  
HERV\_E\_4\_1  
ChrY\_21962399\_1137\_po\_C\_Xz13/9  
ChrY\_8634032\_950\_po\_C\_Xz14/10  
Chr3\_126735360\_997\_po\_C\_Xz5/10  
Chr3\_126713203\_958\_po\_C\_Xz7/8  
Chr3\_75226118\_977\_po\_C\_Xz8/9  
Chr7\_6629919\_827\_po\_C\_Xz8/7  
Chr4\_9166812\_811\_po\_C\_Xz8/10  
Chr12\_8478642\_834\_po\_C\_Xz12/7  
Chr10\_15187175\_787\_po\_C\_Xz11/5  
Chr11\_71819740\_854\_po\_C\_Xz11/9  
Chr11\_71519974\_886\_po\_C\_Xz13/9  
Chr8\_7271441\_969\_po\_C\_Xz10/6  
Chr8\_11770066\_826\_po\_C\_Xz9/8  
Chr4\_4128362\_651\_po\_C\_Xz7/11  
Chr14\_50203955\_850\_po\_C\_Xz10/8  
Chr14\_50205291\_837\_po\_C\_Xz10/8  
Chr7\_6597120\_842\_po\_C\_Xz7/7  
Chr11\_71544658\_783\_po\_C\_Xz8/13  
Chr11\_67999520\_760\_po\_C\_Xz8/8  
Chr3\_75461975\_796\_po\_C\_Xz7/9  
Chr12\_52228939\_692\_po\_C\_Xz3/10  
Chr10\_15211234\_286\_po\_C\_Xz11/1  
Chr12\_100973302\_945\_po\_C\_Xz12/  
Chr19\_9685420\_817\_po\_C\_Xz6/10  
Chr13\_40936820\_719\_po\_C\_Xz9/10  
Chr7\_63858202\_1754\_po\_C\_Xz12/9  
ERV3\_chr7q21\_AC073210\_polputei  
Chr6\_110218096\_843\_po\_C\_Xz16/8  
Chr6\_110214535\_786\_po\_C\_Xz16/8  
ChrY\_3018841\_881\_po\_C\_Rz9/12  
ChrX\_86876098\_639\_po\_C\_Xz7/8  
Chr14\_68899917\_965\_po\_C\_Xz6/8  
ChrY\_23874437\_661\_po\_C\_Xz15/9  
ChrY\_27518418\_649\_po\_C\_Xz15/9  
ChrY\_25016892\_657\_po\_C\_Xz13/12

EGVCZAGYTVLT--WDSVVEAQPLPSGTAQK-----  
DPVHPFKPGDFV--LVKKWNPTTLGPICDGPHTVI-----LSTPTAV  
SRGATAWTAVAVQPSTDTIWFDTGCGSSQWAEI-----RAVW  
EGKRHNHGSVSKDKETLVEAELGKLPNNWSAQTCELFA-----LSQALK  
GGNRSINFSLLPDCNTSFLSLZPTTFSWETPLLSLLG-----VEATK

HLQNOEGT---IYTDS-----KYAFGVAHTFGK--SWTECGLTNSKG-HD  
YLQNOEGT---IYTDS-----RYAFGVAHTFGK--IWTERGLINSKG-QD  
LLEDQEGT---IYTDS-----KYAHGVLHTFGK--IWTEOGLINSRZ-KE  
FLSKVLTQ---SLVDG-----LNASSPSRTAIL--VESRKLTFGGK-LT  
LGKGGKRIN---VYTD---KYAYLILYAHVA--IWKEREFMSGG-TP  
LGKGGKRIN---VYTD---KYAYLILHAAHA--IWKEREFMTSVG-TP  
LGEKGRVN---IYTDS-----KYAYLVLQAYAA--IWREREFMTSEG-TP  
LGEKGRVN---IYTDC-----KYAYLVLHAAHA--IWREREFMTSEG-TP  
LGEKGRVN---IYTDS-----KYAYLVLHAAHA--IWREREFMTSEG-TP  
LGEKGRVN---IYTDS-----KYAYLVLHAAHA--IWKEREFMTSER-TP  
LGEKGRVN---VYTD---KYAYLIPHAHA--IWKEREFMTSGG-TP  
LSEKGRVN---IYTDS-----KYAFVLVHAAHA--IWKEREFMTSGG-SP  
LGERKRIT---IYTDS-----KYAFVLVHAAHA--IWKEREFMTSQD-AP  
LSEKGRVN---IYTDS-----KYAFVLVHAAHA--IWKEREFMTTAGG-SP  
LAKGLRIN---IYTDS-----KYAFHILQHHAV--IWAERGFMTTQG-SS  
LAKGLRIN---IYTDS-----KYAFHILHAAHA--IWAERGFMTTQG-SS  
LAARQQIN---IYSNS-----HYAFHIVHSHSS--IWKERGFMTAKN-TP  
IVPGPDFN---PAS-----HIIP-----DT-TP  
LSEKGRVN---IYTDS-----KYAYHILHSHAA--IWQKRGFLTAGG-TP  
LSEKGRVN---IYTDS-----KYAFILVHAQGA--IWKEREFMTKADN-TE  
WVKDKCIN---IYTDS-----RYAFATVHVHGA--VYQECGLTNSAG-KI  
WVKDKCIN---IYTDS-----RYVFPVHVHKA--IYKSEG--YSPG-KT  
LSEKGRVN---IYTDS-----RYAFATAHTHGS--IYERRGLTSEG-KE  
LSEKGRVN---IYTDS-----RYAFATAHTHGS--IYERRGLTSEG-KE  
MAEGKKNL---VYTD---RYAFATAHIHGE--IYRRRGLTSEG-KE  
LAEGKNIN---IYTDS-----RYAFATAHIHGA--IYKQGLTNSAG-KD  
LSEKGRVN---IYTDS-----QYAFVTLQVHG--ALYKEKGLLNSGG-KD  
FSE-----  
LSEKGRVN---IYIDS-----RHAFVTLQVHG--ALYKEKGLLNSGG-KD  
LSEKGRVN---IYTDS-----RYAFVTLQVHG--ALYKEKGLLNSGG-KD  
LSEKGRVN---IYIDS-----RYAFVTLQVHG--TLYKEKGLLNSGG-KD  
LSEKGRVN---IYTDS-----ZYAFVTLQVHG--ALYKZKGLLNSGG-KD  
LSEKGRVN---IYTDS-----RYAFVTLQVHG--ALYKEKGLLNSGG-KD  
LSEKGRVN---IYTDS-----RYAFVTLQVHG--ALYKEKGLLNSGG-KD  
LSEKGRVN---IYTDS-----ZYVFLTLQVHG--ALYKEKGLLNSGG-KD  
LTDGKIWN---IYTDS-----GHAFVTLQVHG--ALYKEKGLLNSGG-KY  
LSEKGRVN---SYTDS-----ZYTFLTLVHVR--ALCKEKLNFTEG-KN  
LSEKGRVN---TYTDS-----RYVFTLQVHG--AI--EKGLLNSGG-KD  
LSEKGRVN---IYTDS-----WYVFTLQVHG--AZZKEKGLLNSGV-KD  
LSEKGRVN---IYTDS-----RYVFTLQVHG--AIER--KGLLNSGG-KD  
LSEKGRVN---IYTDS-----PYAFVTLQVHG--AIER--KGLLNSGG-KD  
LSEKGRVN---IYTDS-----RYVFTLQVHG--AIER--KGLLNSGG-KD  
LSEKGRVN---IYTDS-----RYVFTLQVHG--AZZKEKGLLNSGG-KD  
LSEKGRVN---IYTDS-----RYVFTLQVHG--AZZKEKGLLNSGG-KD  
LSEKGRVN---IYTDS-----QYVFTLQVHG--VZZKEKGLLNSGE-KD  
LSEKGRVN---TYTDS-----QYVFTLQVHG--VZZKEKGLLNSGG-KD  
LSEKGRVN---IYTDS-----PYVFTLQVHG--AIERR--VLNCGG-KD  
LSEKGRVN---IYTDS-----PYVFTLQVHG--AIER--KGLLNSGG-KR  
LSEKGRVN---TYTDS-----WYAFVTLQVHG--VZQKEKGLLNSGG-KG  
LSEKGRVN---TYTDS-----WYAFVTLQVHG--VZQKEKGLLNSGG-KG  
LSEKGRVN---IYTDS-----RYAFVTLZVHG--ACZKEKGLLNSGG-KG  
LSEKGRVN---IYTDS-----RYVFTLHVVHG--AZZKEKGLLNSGG-KG  
LSEKGRVN---IYTDS-----RYVFTLHVVHG--AIER--KGLLNSGV-KD  
LSEKGRVN---IYTDS-----PYAFVTLQVHG--AIER--KGLLNSGG-KD  
LSEKGRVN---IYTDS-----QYAFVTLQVHG--ALYKEKGLLNSGE-KD  
LSEKGRVN---IYTDS-----RYAFVTLQVHG--ALYKEKGLLNSGG-KD  
LSEKGRVN---IYTDS-----RYVFTLQVHG--AZZKEKGLLNSGG-KD  
LAEDKKIS---VYTD---KYAFATLHVHGA--IYKERGLLTATG-KE  
LAEDKKIS---VYTD---KYAFATLHVHGA--IYKERGLLTATG-KE  
LARGKRVN---VYTD---KYAFATLHVHGA--IYKERGLLTATG-KE  
LARGKRVN---VYTD---KYAFATLHVHGA--IYKERGLLTATG-KE  
LVKDKRVN---IYTDS-----KYAFATLHVHGA--IYKERGLLTATG-KE  
LVKDKRVN---IYTDS-----KYAFATLHVHGA--IYKERGLLTATG-KE  
LAKDKRVN---VYTD---KYAFATLHVHGA--IYKERGLLTATG-KZ  
LTKRKMANN---VYTD---KYTFATLPDNGA--IYKEKGFMTAVGQKE  
LTKRKMANN---VYTD---KYTFATLPDNGA--IYKEKGFMTAVGQKE  
LTKRKMANN---VYTD---KYTFATLPDNGA--IYKEKGFMTAVGQKE

ChrY\_19932937\_520\_po\_C\_Xz10/14  
ChrY\_20104614\_518\_po\_C\_Xz10/14  
Chr19\_58660155\_598\_po\_C\_Xz21/1  
Chr19\_58621153\_500\_po\_C\_Xz21/1  
Chr7\_139686987\_710\_po\_C\_Xz11/7  
Chr7\_137651301\_1097\_po\_C\_Pz13/  
Chr11\_29579197\_930\_po\_C\_Pz8/12  
Chr4\_117329205\_488\_po\_C\_Xz3/16  
Chr21\_38522185\_383\_po\_C\_Xz7/9  
Chr4\_70173370\_1049\_po\_C\_Xz11/8  
Chr4\_70022513\_788\_po\_C\_Kz10/12  
Chr14\_105225894\_1027\_po\_C\_Xz13  
Chr7\_119241536\_761\_po\_C\_Xz11/1  
ChrY\_22564970\_567\_po\_C\_Xz9/10  
Chr21\_14409348\_1477\_po\_C\_Pz5/6  
ChrX\_51259700\_1396\_po\_C\_Pz7/8  
Chr6\_64985396\_1041\_po\_C\_Xz11/1  
ChrY\_20355209\_659\_po\_C\_Xz7/11  
Chr3\_34567166\_523\_po\_C\_Xz8/6  
Chr3\_122072468\_245\_po\_C\_Xz9/9  
Chr11\_58788475\_541\_po\_C\_Xz8/22  
Chr6\_137421042\_373\_po\_C\_Xz6/9  
Chr4\_115910608\_550\_po\_C\_Pz8/12  
ChrY\_13743185\_977\_po\_C\_Xz14/8  
HERV15  
ChrX\_117198092\_983\_po\_C\_Xz8/8  
Chr19\_21166030\_1412\_po\_C\_Xz9/1  
Chr19\_21213743\_913\_po\_C\_Xz14/1  
Chr19\_15957774\_569\_po\_C\_Xz8/10  
Chr11\_77508681\_297\_po\_C\_Xz19/1  
Chr13\_98250769\_738\_po\_C\_Xz7/13  
Chr6\_39968183\_513\_po\_C\_Pz10/9  
Chr15\_66867263\_645\_po\_C\_Xz11/1  
HERV18\_polputein  
HERVIP10FH\_polputein  
MER66\_polputein

LAKGEMVN---VYTD-----KYTFATLHDNGA--IYKEKGLLMAVG-KK  
LAKGEMVN---VYTD-----KYTFATLHDNGA--IYKEKGLLMAVG-KK  
LAKEK-----SIYTNS-----KYAFTTLHVHGT--IYKERGLLSAR--QE  
LAKEKVV---SIYTNS-----KYAFTTLHVHGT--IYKEKGLLSAR--QE  
LAKDKKVVNTVNIYTDS-----KYAFTTLHVHGT--IYKERGLLTAGG-KZ  
LAKDKKVN---VYTD-----KYAFATLHVHGA--IYKERGPLTAGG-KE  
S-KDKKVN---VYTD-----KYAFATLHVHGA--IYKZRGLLTAEK-KE  
LAKDKKVN---VYTN-----VKYVFATLHVHGA--MYR-RGLLTAEG-KE  
LMRDKKVN---IYTDKSKQRQKCVFATLHVHGA--IYKERGLLTAGG-KE  
LAKDQKAN---IYTD-----KYAFATLHVHGA--IYKEKRLTPGG-KE  
LAKVQKAN---LYRDS-----KYAFATLHVHGA--IYKEKELLTAGG-KE  
LAKDQKTN---IHTNS-----KYAFATLHVHGA--IYKERGLLTDGG-KE  
LAKDKKIN---VYTD-----KYAFATLHVHGA--IYKERGLLTARD-KE  
LARGKVVN---SYTDF-----KYAFVTLAHLGA--IYKERGLLTAGR-KE  
LAKRKSAN---IYTD-----RYAFATLHAHGA--IYKERGLLTTEG-KE  
LAKGKSVN---IYTD-----KYAFATLHAHGA--IYKEKGLLTTEG-KE  
LAKGKSVS---IYTD-----RYVFA-IHAHGA--IYKERGLLTTEG-KE  
LARGKSVN---IYNDL-----RYAFATLHAHGA--IYKERGLLATEG-KE  
LAKGKSVY---IYTD-----RYAFATLHAHGA--ISKERGLLTTEG-KE  
LAKGKSVN---IYTD-----RHAFATLHAHRA--KYKERGLLTTEG-KE  
LAKGKSVN---IYTVS-----RYAFATLPHVG--AYKERALLTTEG-KE  
LAK-KSVN---IYTD-----RYAFATLHAHGA--IYKERGLLTTEG-KE  
LAKGKSVN---IYTD-----RYAFATLHAHGA--IYKERGLLTTEG-KK  
LAKRKKVS---IYTD-----RYVFATLHDHGA--IZKERGLLTTEG-ND  
LAKRKKVN---IYTD-----RYAFATLHAHGA--IZKERGLLTTEG-KD  
LAKGKVVN---ICTDS-----KYAFATLRAHGG--IHKERGLLTTEG-KE  
LAKGK-N---IYTD-----NCAFATLHTHGA--IYN-RGLLTTEG-KE  
LAKGKVN---IY-T-S-----KYAFATLHTHGV--TYKERGLZTMRK-KE  
-----LSSSLSFMYSPPT-ISISPPPTAIPP-----  
KFSRRHLGSQVSLGPGLPPIGKGDSPVISTP--GWLAEMLQETEEWRD  
QICHEEVTYLGFIVSHEERLGDERKQAIKALP-----  
-AELIALTRALLLAKGKVVNIYTDYAFATLHAH-----  
KVAGRALDPPQLAETGIPGPVLDLPPAGPRPSDQA--DLZ-----  
MVITKEVTPMVICTDS-----WAVYRGLLVVNY--LELQKWLVGHRP---  
YLQDTERA---IYTNS-----KLIWTEQGLINS---KEIEIPNLQGFQQ  
AQPDTMLS-----LLILFALPITLIQCGWEQNSIVNISKIIA

HERVI\_polputein  
HERVIP10F\_polputein  
HERVadp\_AC005741  
HERV-PT47D  
HERV\_W\_chr6\_141432567\_ERV9\_lik  
ERV9\_PH1\_RT  
Chr13\_54564403\_572\_po\_C\_Yz7/14  
HERV\_Y\_chr12\_51022911\_pol  
HERV17\_polputein  
HERV\_W\_chr7\_9105739\_syncytin\_p  
HERV9\_polputein  
HUERS-P3\_polputein  
ERVfrd\_AC004022  
PRIMA41\_polputein  
HERV\_H\_RGH1\_pol  
HERVHRGH2\_pol  
HERV\_H48I\_polputein  
HERV\_H\_RTVLH2\_pol  
HERVVFH21\_pol  
HERVRblike\_chr4\_109047953  
ChrY\_13790029\_693\_po\_C\_Xz12/11  
HERVS71\_polputein  
BaEV\_M7\_pol  
HERVR\_polputein  
AKR\_MLV\_MLOGC\_RT  
GalV\_pol  
Chr3\_158587414\_1662\_po\_C\_Ez10/  
Chr3\_79627623\_1138\_po\_C\_Ez4/7  
Chr19\_20477244\_1350\_po\_C\_Ez10/  
Chr5\_111890459\_1626\_po\_C\_Ez10/  
ChrX\_48766518\_1600\_po\_C\_Ez6/3  
ChrX\_152580713\_1572\_po\_C\_Ez10/  
ChrX\_139287533\_1154\_po\_C\_Xz8/4  
Chr2\_52615786\_912\_po\_C\_Xz11/5  
HERV-E\_4\_1  
ChrY\_21962399\_1137\_po\_C\_Xz13/9  
ChrY\_8634032\_950\_po\_C\_Xz14/10  
Chr3\_126735360\_997\_po\_C\_Xz5/10  
Chr3\_126713203\_958\_po\_C\_Xz7/8

LVHKELIQVLDNLQLPPEIAIVR-VPGHQKSLSF-----  
LVHKELITQVLNLLQLPPEIAIVH-VPGHQKSLSF-----  
LVHVELVQVLESLLLPAEVAIVH-VNDHQIGNTV-----  
VSKPHQVRTILN-----  
IKYHKEIIQLLHAVQKPKAVLTLT-AEAEKGGK-----  
IKYHKEIIQLLHAMQKHKEVGLLH-ZQSHQNRK-----  
IKHQEAIRRRLLAVQKPKAVLTLH-CRGGHQKGGK-----  
IKHQEAIRRRLLAVQKPKAVLTLH-CRGGHQKGGK-----  
IKHQEAIRRRLLAVQKPKAVLTLH-CRGGHQKGGK-----  
IKHQEAIRRRLLAVQKPKAVLTLH-CRGGHQKGGK-----  
IKCHKEIMELLHALQKPKAVLTLH-CQSHQKGE-----  
IKYHQEINRLLSSVFLPREVAVMH-CRGGHQKGT-----  
IKYQSQVLELEAAHLQKPKAVLTLH-CEGHHRGF-----  
IKHHLERNLLDAVLLPKEVAIIH-CRGGHLKGN-----  
IINASLIKTLKTLTLLPKEAGVIH-CKGGHQKAS-----  
IINAS-KKTLKKAALLPKEAGVIH-CKGGHQKTS-----  
VINGSLISKLLQAARLPQKVAIIH-CRGGHQTPD-----  
DPHDCISLIHLTFTTFFPHIS-----FFPIP-----  
ITNGSPYLPQLQAHLPTKAGVIH-CZGHQTSERPLGNRLISRXXXXXX  
IKYAKQVLELPEAIKAPREIAVMR-CPGHQCNN-----  
VKNKEEILALLEA-----VAVIH-CKGGHQKEDLA-----  
IKNKEEILALLEAVWLPQVAVIIH-CKCHQTEGMA-----  
IKNKAIEIALLKALFLPQEVAVIIH-CPGGHQKQDP-----  
IKNKAIEIALLKALFLPQEVAVIIH-CPGGHQKQDP-----  
IKNKDEIALLKALFLPKRLSIIH-CPGGHQKGHSA-----  
IKNKEEILALLEAIIHLPRRVAIIH-CPGGHQKRSNP-----  
IK-SQEILQLEAVZKPKQKAVMH-CRGGHQQASTS-----  
-----  
IKYQQEILQLEAVWPKQKAVMH-CREYQZGSTS-----  
IKYQQVILQLEAVWPKQKAAVMH-CRGGHQQASTS-----  
IKYQQEILQLEAVWPKQKAVMH-CRGGHQRASIS-----  
IKYQQEVILQLEAVWPKQKAVMH-CRGGHQRASTS-----  
IKYQQEILQLEAVRKPQKAVMH-CRGGHQZASTL-----  
IKYQZEVLQLEAVWPKQKVTVMY-CRGGHQRASTS-----  
IKYQQEILQLEAVWPKPKVAVIIH-CGGHQZASTL-----  
IKDQQEILQLEAVWRPRKAVMH-CRGGHQZASTS-----  
IKYQQEILKLEAVWPKQKAVLH-CSGGHQZSSTS-----  
RKYQQEILQZZEAVLKPQKAVMH-CRGGHQRASIS-----  
RKYQQEILQZZEAVWPKPKVAVMH-CRGGHQRASTL-----



|                                |                                                  |
|--------------------------------|--------------------------------------------------|
| HERV17_polputein               | -----EREIEGNRQADI EAKRAARQDP-----                |
| HERV_W_chr7_9105739_syncytin_p | -----EREIEENCQADI EAKRAARQDP-----                |
| HERV9_polputein                | -----GEKAEGNRQADAEAK IAAARWLLP-----              |
| HUERS-P3_polputein             | -----DEIAKGNKLADQAAKSAARKPQG-----                |
| ERVfrd_AC004022                | -----YZTTWGNRLADKNAAEEAAMSNDT-----               |
| PRIMA41_polputein              | -----SSVTKGNFSFADAAAKATALKDPVG-----              |
| HERV_H_RGH1_pol                | -----DPIALGNAYADKVARQAASSPTS-----                |
| HERVHRGH2_pol                  | -----DPIALGNAYADKVARQAASSPTF-----                |
| HERV_H48I_polputein            | -----NPISAGNALADQVAKQVALQP-----                  |
| HERV_H_RTVLH2_pol              | -----HPITLD-----                                 |
| HERVVFH21_pol                  | KAAXNRISGGIRNEISRGNRKADEAAKEASLSS-----           |
| HERVRblike_chr4_109047953      | -----SEVARGNAFLDCTARHLASSNVELRVPLIPQIDLAASN----- |
| ChrY_13790029_693_po_C_Xz12/11 | -----IAHGNQRADSVTRKAAWLPVMPPLTLL-----            |
| HERVS71_polputein              | -----IACGNQKAGSAAREAAWLPVTPPLTLL-----            |
| BaEV_M7_pol                    | -----VAVGNRQADRVARQAAMA EVLTLATE-----            |
| HERVR_polputein                | -----VAVGNRQADRVARQAAMA EVLTLATE-----            |
| AKR_MLV_MLOCG_RT               | -----EARGNRMADQAARKAAITETPDTSTL-----             |
| GaLV_pol                       | -----VATGNRRADEAAKQAALSTRVLAGTT-----             |
| Chr3_158587414_1662_po_C_Ez10/ | -----VALGNSQVDSEAZKATSTPYWASVA-----              |
| Chr3_79627623_1138_po_C_Ez4/7  | -----                                            |
| Chr19_20477244_1350_po_C_Ez10/ | -----VALGNSRADSEARKAASTPYZASVA-----              |
| Chr5_111890459_1626_po_C_Ez10/ | -----VALGNSZADSEAQNAASTPYWASVA-----              |
| ChrX_48766518_1600_po_C_Ez6/3  | -----VALGSSRADSEAZKAASTPYQALVA-----              |
| ChrX_152580713_1572_po_C_Ez10/ | -----VALGNSRADSEAZKAASTPYWASVA-----              |
| ChrX_139287533_1154_po_C_Xz8/4 | -----VSQGNRADTEARKAASTPYRASVT-----               |
| Chr2_52615786_912_po_C_Xz11/5  | -----IALGTSZADSEAQKAAFTQYWASVT-----              |
| HERV-E_4_1                     | -----VGLGNSCTDLEAQKAALP-FRASVT-----              |
| ChrY_21962399_1137_po_C_Xz13/9 | -----ISLGNSQADSEAZKSVSTPYWASVT-----              |
| ChrY_8634032_950_po_C_Xz14/10  | -----VALGYPZADSEAQKAASTSYWASVA-----              |
| Chr3_126735360_997_po_C_Xz5/10 | -----LGLGNSHSDSEVRKAASAPFWASV-----               |
| Chr3_126713203_958_po_C_Xz7/8  | -----LGLGNSRADSEAQKAASAPFRASV-----               |
| Chr3_75226118_977_po_C_Xz8/9   | -----LGLGNPRADSEAQKAASAPFWASV-----               |
| Chr7_6629919_827_po_C_Xz8/7    | -----LGLGNSCADSEAQKAASAPFQASV-----               |
| Chr4_9166812_811_po_C_Xz8/10   | -----LGLGNSRADSEARKAASAPFRASV-----               |
| Chr12_8478642_834_po_C_Xz12/7  | -----LGLGNPRADSEAZKAASAPFWASV-----               |
| Chr10_15187175_787_po_C_Xz11/5 | -----LGLGNSGADSEARKAASAPFWASV-----               |
| Chr11_71819740_854_po_C_Xz11/9 | -----LGLRNSRADSEARKAASPPFWASG-----               |
| Chr11_71519974_886_po_C_Xz13/9 | -----LGLGNSRADSDARKAASAPFWASV-----               |
| Chr8_7271441_969_po_C_Xz10/6   | -----LCLGNSRAESEARKAATAFPWASV-----               |
| Chr8_11770066_826_po_C_Xz9/8   | -----LDLGNSHADSEARKAASVPFWASV-----               |
| Chr4_4128362_651_po_C_Xz7/11   | -----AGFGFPRDSEAGKAASAPFGASV-----                |
| Chr14_50203955_850_po_C_Xz10/8 | -----VGLGNSRADSEAGKAASAPFZASVT-----              |
| Chr14_50205291_837_po_C_Xz10/8 | -----VGLGNSRADSEAGKAASAPFZASVT-----              |
| Chr7_6597120_842_po_C_Xz7/7    | -----VGLGNSRADSEARKAASAPFQASVT-----              |
| Chr11_71544658_783_po_C_Xz8/13 | -----VGLGNSRADSEAQKQHLP-LSRSVT-----              |
| Chr11_67999520_760_po_C_Xz8/8  | -----VGLGNSRADSZAGKAASARFQASVT-----              |
| Chr3_75461975_796_po_C_Xz7/9   | -----LGLGNSCADSEAPKAASAPFWTSV-----               |
| Chr12_52228939_692_po_C_Xz3/10 | -----LGLGNSRADSEARKAASAPFRQSVT-----              |
| Chr10_15211234_286_po_C_Xz11/1 | -----VGLGNSRADSEAKAASVPFRASVI-----               |
| Chr12_100973302_945_po_C_Xz12/ | -----VALGNSRANSEAPKAASTPYWASVA-----              |
| Chr19_9685420_817_po_C_Xz6/10  | -----VALGNSRADSETRKAASTPYRASVA-----              |
| Chr13_40936820_719_po_C_Xz9/10 | -----IALNTTVGVHTWGTSTGLFLVSSK-----               |
| Chr7_63858202_1754_po_C_Rz12/9 | -----EAKGNRKADREAKWAAMVTPHFKEE-----              |
| ERV3_chr7q21_AC073210_polputei | -----EAKGNRKADREAKWAAMVTPHFKEE-----              |
| Chr6_110218096_843_po_C_Xz16/8 | -----QPKGNKKADREAKWAAMTTPHLREE-----              |
| Chr6_110214535_786_po_C_Xz16/8 | -----QPKGNKKADREAKWAAMTTPHLREE-----              |
| ChrY_3018841_881_po_C_Rz9/12   | -----EAKRNGKTREARQAATTTAHSRKK-----               |
| ChrX_86876098_639_po_C_Xz7/8   | -----EAKRNGKTREARQAATTTAHSRKE-----               |
| Chr14_68899917_965_po_C_Xz6/8  | -----EAKGNRKADREAKQAAVTTLHPGEE-----              |
| ChrY_23874437_661_po_C_Xz15/9  | -----EAKRNKKVDRYAKGAAMTTHR-QTT-----              |
| ChrY_27518418_649_po_C_Xz15/9  | -----EAKRNKKVDRYAKGAAMTTHR-QTT-----              |
| ChrY_25016892_657_po_C_Xz13/12 | -----EAKRNKKVDRYAKGAAMTTHR-QTT-----              |
| ChrY_19932937_520_po_C_Xz10/14 | -----EAKKNKKIDREARGAAMTTLQFKKK-----              |
| ChrY_20104614_518_po_C_Xz10/14 | -----EAKKNKKIDREARGAAMTTLQFKKK-----              |
| Chr19_58660155_598_po_C_Xz21/1 | -----EATGNRKA--EAKQAAMITLHFKEE-----              |
| Chr19_58621153_500_po_C_Xz21/1 | -----EAKGNRKADREAKQAAMITLHFKEE-----              |
| Chr7_139686987_710_po_C_Xz11/7 | -----EAKGNRKTGRGAKRAAMIMPHFKEE-----              |
| Chr7_137651301_1097_po_C_Pz13/ | -----EAKGNRKADMEAKGAMTTPHCKE-----                |
| Chr11_29579197_930_po_C_Pz8/12 | -----EAKGNRKVDREVAMA---TLHCEEE-----              |
| Chr4_117329205_488_po_C_Xz3/16 | -----EAKGNRKADKEAKRAAMTTPPFKEE-----              |
| Chr21_38522185_383_po_C_Xz7/9  | -----EAKGNRKADREAKRTAMITPHFEKE-----              |
| Chr4_70173370_1049_po_C_Xz11/8 | -----EAKGNRKADKEAKQAAMATTFYSKEE-----             |
| Chr4_70022513_788_po_C_Kz10/12 | -----EAKGSRKTDKEAKQAAMATPP-SKQE-----             |
| Chr14_105225894_1027_po_C_Xz13 | -----EVKGNRKAD-EAKQTAVVTLTP-SKEE-----            |
| Chr7_119241536_761_po_C_Xz11/1 | -----ETMGNRKADREAKWATMTTLHFKEE-----              |
| ChrY_22564970_567_po_C_Xz9/10  | -----AKANRKADKKAQWASMATFPFKEG-----               |
| Chr21_14409346_1477_po_C_Pz5/6 | -----ETTGNRKADKEVKRAAMTEITKKE-----               |

ChrX\_51259700\_1396\_po\_C\_Pz7/8 -----EATGNRKVDREAKRAAITKMTEKR-----  
Chr6\_64985396\_1041\_po\_C\_Xz11/1 -----EARGNRK-ATEAKRAAMTEVTKKEE-----  
ChrY\_20355209\_659\_po\_C\_Xz7/11 -----EARGNRKGDREAKGAAMTEVTKMEE-----  
Chr3\_34567166\_523\_po\_C\_Xz8/6 -----EARGKRKVDREAKRAAMTDVTKKEE-----  
Chr3\_122072468\_245\_po\_C\_Xz9/9 -----KARGNRKADREAKRAVMTEVTKKEK-----  
Chr11\_58788475\_541\_po\_C\_Xz8/22 -----ETRGNGKADREAKRTAMADEVTKKEE-----  
Chr6\_137421042\_373\_po\_C\_Xz6/9 -----KARENKKAEREAKRAAMTAITKKEE-----  
Chr4\_115910608\_550\_po\_C\_Pz8/12 -----EARGNRKVDREAKRAAMTEVTKKEK-----  
ChrY\_13743185\_977\_po\_C\_Xz14/8 -----EAQGNRZADQEAQQAAMSKVLPEER-----  
HERV15 -----EAQGNRKADQEAQQAAMSKVLPEER-----  
ChrX\_117198092\_983\_po\_C\_Xz8/8 -----EVQGNRKADQEARQAAMSKASPEER-----  
Chr19\_21166030\_1412\_po\_C\_Xz9/1 -----EAQGNRRADQEVRAAMSKVLPEEI-----  
Chr19\_21213743\_913\_po\_C\_Xz14/1 -----KVQGNRKVDPEARQAAMNKALPVKR-----  
Chr19\_15957774\_569\_po\_C\_Xz8/10 -----SPMRPQPKALS-----  
Chr11\_77508681\_297\_po\_C\_Xz19/1 -----SGLTKVKKAVNHVHNLWPCIAAGGLG-----  
Chr13\_98250769\_738\_po\_C\_Xz7/13 -----PNFSLMPKPLYEATKG-----GEKEP-----  
Chr6\_39968183\_513\_po\_C\_Pz10/9 -----KSZGKHNNHKKG-----  
Chr15\_66867263\_645\_po\_C\_Xz11/1 -----TPKADQSTHGNNLRKQ-----Q-----  
HERV18\_polputein -----SNDEADALAKVQWLESASTZ-----  
HERVIP10FH\_polputein -----MVIIFEKKKGGGRIYVKGMLYGKFLSZ-----  
MER66\_polputein -----PDLTNNHNSNPEVPKPLLKWNNSPPLN-----

HERVI\_polputein -----MFHLTPCLPSPT--AISFFSSIEKEEKIEPKKTRMKTAVTRPKGN  
HERVIP10F\_polputein -----IFHLTPYLPPTN-PHFLFTEKEKLIKIGAKENSEGKWLLPDQREM  
HERVadp\_AC005741 -----LFSLIPDISKVVLRPQFTKEEKEELDKIGVTQTEDGKWVLPAGR-E  
HERV-PT47D -----TLFIT-----  
HERV\_W\_chr6\_141432567\_ERV9\_lik -----RKRQEVREKE-----KETERQSKKEREETKMESERKRET  
ERV9\_PH1\_RT -TGSQRKRQGRDKKLEERRGTDEVKERVKKRGRDKKEVKERDGSSEKKT  
Chr13\_54564403\_572\_po\_C\_Yz7/14 LYRNLKRAVLHQEAIRLLAVQKPKVAVLHCRGHQKGERIEGNCQA  
HERV\_Y\_chrl2\_51022911\_pol -LEMLIEGPLVWGNPLQETKPKQYSEEEIEWGTSZGHSFLLRMASHQRKN  
HERV17\_polputein -LEMLIEGPLVWGNPLRETKPKQYSAEEIEWGTSRGHSFLPSGLATEEGK  
HERV\_W\_chr7\_9105739\_syncytin\_p -LEMLIKQPLVZGNPLREPSPS-TQQEKQNGEPHEDSFLPSGLATEEGK  
HERV9\_polputein -LEIPMEGLEWKNKPLQEKPKQYSPNETEWGLSWGHSFLPSGLWTTKEGK  
HUERS-P3\_polputein --INTLQAPLIWEGSIREIKPKQYSPTIEWATSRGYTFQPSWLQQRMAN  
ERVfrd\_AC004022 -----FMGDLFLSLPSELPLQYTKKEIDWSSQHGYKEETSQWYRLEEFSS  
PRIMA41\_polputein -----LVGMLVPSATVITEPRYTKEEQEWAKGQGLIQDPSGLIND-NK  
HERV\_H\_RGH1\_pol -----VPHSQFFSFASVTPTYSPTETSTY--QSLPTQKGFWDQCK  
HERVHRGH2\_pol -----VPHQFFSFTSVTPTYSTAETSTY--QALPPQKGFWDQCK  
HERV\_H48I\_polputein -----VQQQFLSLSLFSPLYSSEEEKEDFRAQNLQKQGPWYVKEGC  
HERV\_H\_RTVLH2\_pol -----LLMASTRPNCHTPAKADY-----A  
HERVVFH21\_pol -----APASLLLIPQSNPXTLPLRKGFTTTTRNLLPRGLDSQSKS  
HERVRblike\_chr4\_109047953 LGTVLRTKRLPRTKGLFRMKNDWKLNDKGLIIVSEIKFLLSYFCLHLVL  
ChrY\_13790029\_693\_po\_C\_Xz12/11 -----S-AVSFPQPNL----AAPEKKNKQLFRPINQ-EGWWILPDSRI  
HERVS71\_polputein -----P--TVSFPQPDLPDHPQTPQRKKNKQLIFGPVNIKRVVWILPDSRI  
BaEV\_M7\_pol -----PDNTHITIEHT-YTSEDQE-EARAIGATENKDRNWEKEGKI  
HERVR\_polputein -----PDNTHITIEHT-YTSEDQE-EARAIGATENKDRNWEKEGKI  
AKR\_MLV\_MLOCG\_RT -----L--IENSSPYTSEHFHYTVTDIK-DLTKLGAIDYDKTKKYVYVQKGP  
GaLV\_pol -----K--PQEP-----IEPAQE-KTRPRELTPDR-----GK-  
Chr3\_158587414\_1662\_po\_C\_Ez10/ -----A-PLLPQTPDLVPTYSKKEKDFFH-AEGGQAIKGGWIRLPDGRV  
Chr3\_79627623\_1138\_po\_C\_Ez4/7 -----A-PLLPQIPDLVPTZ--ERKRLLP-HRRQVVIKGGWIRLPDGRV  
Chr19\_20477244\_1350\_po\_C\_Ez10/ -----A-PLLPQTPDLVPTYSKKEKDFFH-AEGGQVIKGGWIRLPDGRV  
Chr5\_111890459\_1626\_po\_C\_Ez10/ -----A-PLLPQTSDLVPTYSKKEKDFFH-AEGGZVIKGGWIRLPDGRV  
ChrX\_48766518\_1600\_po\_C\_Ez6/3 -----T-PLLPQTPDLVPTYSKERLLPL-RKGASKKEDGSDC-QGRV  
ChrX\_152580713\_1572\_po\_C\_Ez10/ -----A-PLLPQTPDLVPTYSKKEKDFLQ-AEGGQTIKERCILPDGRI  
ChrX\_139287533\_1154\_po\_C\_Xz8/4 -----AHPLLPQARDLVPTYSEEEKDFLQ-AEGGQVIEEGZFQLLDRRI  
Chr2\_52615786\_912\_po\_C\_Xz11/5 -----A-PLLPQAPDLVPTYSKKEKDFLQ-AEGGQVMEEGWIWLPDGRV  
HERV\_E\_4\_1 -----A-PLLPQAPDIVPTYSKKEKDFLQ-AEGGQVIEEGGIWLLGRI  
ChrY\_21962399\_1137\_po\_C\_Xz13/9 -----I-PLLPQIPDLVSAYSKEKDFFH-AEVGQVIKGGD-QTARFEG  
ChrY\_8634032\_950\_po\_C\_Xz14/10 -----FPQAPDLGPTSSKEKDFLQ-VEGRTSDGGRMDSVTRWET  
Chr3\_126735360\_997\_po\_C\_Xz5/10 -----LPQAPDLGPTSSKEKDFLQ-VEGRTSDGGRMDSVTRWET  
Chr3\_126713203\_958\_po\_C\_Xz7/8 -----LPQAPDLGPTSSKEKDFLQ-VEGRTSDGGRMDSVTRWET  
Chr3\_75226118\_977\_po\_C\_Xz8/9 -----LPQAPDLGPASSKEKDFLQ-VEGRTSDEGRMDSVTRWEV  
Chr7\_6629919\_827\_po\_C\_Xz8/7 -----LPQAPDLGPTYSKKEKDFVQ-VEGRTSDGGRMNSVTRWES  
Chr4\_9166812\_811\_po\_C\_Xz8/10 -----LPQAPDLEPTYSKKEKNFLQ-VEGRTSDGGRMDSVTDGRV  
Chr12\_8478642\_834\_po\_C\_Xz12/7 -----LPQAPNLGPASSKEKDFLQ-VEGRTSDEEGWIRLPEGRE  
Chr10\_15187175\_787\_po\_C\_Xz11/5 -----LPQAPDLGPASSKEKDFLQ-VEGRTSDGGGWIWIRLPHGRE  
Chr11\_71819740\_854\_po\_C\_Xz11/9 -----LPQAPDLGPTSSNEEKDFLQ-VEGRTSDEEGWIRLADGRV  
Chr11\_71519974\_886\_po\_C\_Xz13/9 -----LPQAPDLGPT-SKEKDFLQ-VEGRTSDGGRMDSVSDGRV  
Chr8\_7271441\_969\_po\_C\_Xz10/6 -----LPQAPDLGPASSKEERTFSRZREGQVMEEGWIQLPDR-RV  
Chr8\_11770066\_826\_po\_C\_Xz9/8 -----LLQAPDLGPASSKEKDFLQ-VEGRTSDGGRMDLVTRWEV  
Chr4\_4128362\_651\_po\_C\_Xz7/11 -----LPQAPDLGPTSSKEKDFLQ-VEGRTSDGGRMNSVTRWES  
Chr14\_50203955\_850\_po\_C\_Xz10/8 -----A-PLLPQAPDLGPAYSKEKDFLQ-VEGRTSDGGRMDSVTRGRV  
Chr14\_50205291\_837\_po\_C\_Xz10/8 -----A-PLLPQAPDLGPAYSKEKDFLQ-VEGRTSDGGRMDSVTRGRV  
Chr7\_6597120\_842\_po\_C\_Xz7/7 -----A-PLLPQAPDLGPAYSKEKDFVQ-VEGRTSDGGRMDLVTWES  
Chr11\_71544658\_783\_po\_C\_Xz8/13 -----A-PLLPQAPDLGPAYSKEKDFLQ-VEGRTSDGGGWIWIRLPDGRV  
Chr11\_67999520\_760\_po\_C\_Xz8/8 -----A-PLLPQAPDLGPAYSKEKDFVQ-VEGRTVMEEGWR-----V

Chr3\_75461975\_796\_po\_C\_Xz7/9  
Chr12\_52228939\_692\_po\_C\_Xz3/10  
Chr10\_15211234\_286\_po\_C\_Xz11/1  
Chr12\_100973302\_945\_po\_C\_Xz12/  
Chr19\_9685420\_817\_po\_C\_Xz6/10  
Chr13\_40936820\_719\_po\_C\_Xz9/10  
Chr7\_63858202\_1754\_po\_C\_Xz12/9  
ERV3\_chr7q21\_AC073210\_polputei  
Chr6\_110218096\_843\_po\_C\_Xz16/8  
Chr6\_110214535\_786\_po\_C\_Xz16/8  
ChrY\_3018841\_881\_po\_C\_Rz9/12  
ChrX\_86876098\_639\_po\_C\_Xz7/8  
Chr14\_68899917\_965\_po\_C\_Xz6/8  
ChrY\_23874437\_661\_po\_C\_Xz15/9  
ChrY\_27518418\_788\_po\_C\_Xz15/9  
ChrY\_25016892\_657\_po\_C\_Xz13/12  
ChrY\_19932937\_520\_po\_C\_Xz10/14  
ChrY\_20104614\_518\_po\_C\_Xz10/14  
Chr19\_58660155\_598\_po\_C\_Xz21/1  
Chr19\_58621153\_500\_po\_C\_Xz21/1  
Chr7\_139686987\_710\_po\_C\_Xz11/7  
Chr7\_137651301\_1097\_po\_C\_Pz13/  
Chr11\_29579197\_938\_po\_C\_Pz8/12  
Chr4\_117329205\_488\_po\_C\_Xz3/16  
Chr21\_38522185\_383\_po\_C\_Xz7/9  
Chr4\_70173370\_1049\_po\_C\_Xz11/8  
Chr4\_70022513\_788\_po\_C\_Kz10/12  
Chr14\_105225894\_1027\_po\_C\_Xz13  
Chr7\_119241536\_761\_po\_C\_Xz11/1  
ChrY\_22564970\_567\_po\_C\_Xz9/10  
Chr21\_14409346\_1477\_po\_C\_Pz5/6  
ChrX\_51259700\_1396\_po\_C\_Pz7/8  
Chr6\_64985396\_1041\_po\_C\_Xz11/1  
ChrY\_20355209\_659\_po\_C\_Xz7/11  
Chr3\_34567166\_523\_po\_C\_Xz8/6  
Chr3\_122072468\_245\_po\_C\_Xz9/9  
Chr11\_58788475\_541\_po\_C\_Xz8/22  
Chr6\_137421042\_373\_po\_C\_Xz6/9  
Chr4\_115910608\_550\_po\_C\_Pz8/12  
ChrY\_13743185\_977\_po\_C\_Xz14/8  
HERV15  
ChrX\_117198092\_983\_po\_C\_Xz8/8  
Chr19\_21166030\_1412\_po\_C\_Xz9/1  
Chr19\_21213743\_913\_po\_C\_Xz14/1  
Chr19\_15957774\_569\_po\_C\_Xz8/10  
Chr11\_77508681\_297\_po\_C\_Xz19/1  
Chr13\_98250769\_738\_po\_C\_Xz7/13  
Chr6\_39968183\_513\_po\_C\_Pz10/9  
Chr15\_66867263\_645\_po\_C\_Xz11/1  
HERV18\_polputein  
HERVIP10FH\_polputein  
MER66\_polputein

-----FPQAPDLGCTYSKEEKDFLQ-VEGRTSDGGRWIRLDPGRV  
-----A-TLLPQAPDLVPTYSKEEKDFLQ-VEGRTSDEEGWIRLDPGRV  
-----A-PLLQAPDLGPAYSKEZKDFLQ-VEGRTSDGGRMSVTRWER  
-----A-PLLQPTPELVPTYSREER--LLPCRRGQVIKGGWIRLDPGKV  
-----A-PLLQPTPDLVLPILRKKK--TSSAEGGQVIKGGWNRLPDGRV  
-----D--TAPSITVGVPHVCTPVILFVISMVNITSSNPQRVHPVIFFI  
-----ALAMPLLEPPPLQEVSSYSPNEKAVLPKLENILKEDGGNF-DGRS  
-----ALAMALLPEPPLPVVLSYSPNAKAWFSRESGKYIERGGGDS-PVGD  
-----ALAMALLPEPPLPVVLSYSPNAKAWFSRESGKYIERGGGDS-PVGD  
-----ALVIPLLLKPPPLGRFQVTLQVRRPG-AQESGKYIEGGWZKFSDRRL  
-----ALVIPLLEPPPLGRFQVTLQVRRPG-AQESGKYIEGGWZKFSDRRL  
-----ALAMPPLPEPPLLEVSSYSPNEKAWFAQESGKYIEVGGWKFSDGRL  
-----AIADSPPKYAPLRGFKLP-PNEKLCFSQSGSKYIKRD-GEFSNRRL  
-----AIADSPPKYAPLRGFKLP-PNEKLCFSQSGSKYIKRD-GEFSNRRL  
-----AIADSPPKYAPLRGFKLP-PNEKLCFSQSGSKYIKRD-GEFSNRRL  
-----AIAMPPLPKPLLEVVSSY-LQEKPCFAQESGKYIKCY-GENSPRRL  
-----AIAMPPLPKPLLEVVSSY-LQEKPCFAQESGKYIKCY-GENSPRRL  
-----ALAMPPLPEPPLQDNPSYTPNQRSWFAQEDKKYIKRRZKFSDRRL  
-----ALAMPLLPTSSPR-RPKLYSKSKILVCQEDIKCMKRKZKFFYRRL  
-----ALAMPPLPEPPLQEDPTYPNERAWFAQESGKYIKGGWZKLFDSGS  
-----ALALPLLP-----EVPNYSNERAWCAKQTGHYIEERWKFSDERL  
-----ALAMPPLPEPPLLEVPNYSNERAWFAKDTGSYIKRRZKFSNRRL  
-----ALTMPLLEPPPLSEIPSYSPNKKAWFAREIGKYTESMVEILT--RL  
-----SLAMLLLEPPPLSEIPSYSPNEKAWFAQETGKCTEGGWKFSNGRL  
-----ALAMPLLLEIPLPGTPTSYTP-IKGLDLPRKMGITTEGRWKFSDGRL  
-----ALAMTLLPEIPLPETPTSYTP-MKGLGLQENGNVVEGGWZKFSNGRL  
-----ALAMPLLPEIPLPETPTSYTPNERAFFAENGYSYVEGGWZKFSNGRL  
-----TLDMPLLPDPPLPEVSSILQMRPGLPENLESTLKE-----NGGNS  
-----ALAMPFLPEIISLPEIIPSYTLNERSCFQAQENGNYTEGGWZKFSNGRL  
-----ETYVMPLEPPLAETPNYSSEKAVWFTQENGCYQKGGWGSFQMGRR  
-----ETYVMPLEPPLAETPNYSSEKAWFAQENGDSSKGGWZKFSNGRL  
-----ETLTMPLELPLTEPTNYSSNEKA-FEQDSEVTRKEVGGSSR-WEA  
-----ETLTMPLELPLTEPKNYSNEKAWFEQESRSYQKGSZKFSNGRL  
-----ETLTMPLELPLTEPKNYSNEKAWFEQESRSYQKGSZKFSNGRL  
-----ETLTMPLELPLTEPKNYSNEKAWFEQESRSYQKGSZKFSNGRL  
-----TPAMPPLLEPPLRYPIITLZVKKLGFITKQETYIKDSWWLFSNGRL  
-----TPAMPPLLEPPLRYPIITLZVKKLGFITKQETYIKDSWWLFSNGRL  
-----TLAMPPLLEPPLLEVPPYSSSEKACFVLETGKYIKGGWZKFSNGRL  
-----TLAMPFLVEPPLPEVPPNYSSIEKAWFQETGKYIKGGWZKFSNGRL  
-----TLAMPPLLEPPLPEVPPNYSSIEKAWFRQETGKYIKSGWZKFSNGRL  
-----WKDLPSLRRIWA-----  
-----AVSKENQELAKYRHLZNIIMLKKPGKEVTVKEFVFLFFFLQPCSG  
-----LLWKTQEIAPFKZIKEALTAQAPALGLPDITKPFPLZ-----  
-----HTHKKGYRYRRLKK-----  
-----TLLZSPQKLTSLHTAEAZ-----  
-----  
-----NKLTGCLKKGMFATSQKVEACQRIVCKSREKKVIKGFMEML  
-----GFHLNSXTTITWTWEVGYLYLQCTNDSIFCTHCCVNDTKA

HERVI\_polputein  
HERVIP10F\_polputein  
HERVadp\_AC005741  
HERV-PT47D  
HERV\_W\_chr6\_141432567\_ERV9\_lik  
ERV9\_PH1\_RT  
Chr13\_54564403\_572\_po\_C\_Yz7/14  
HERV\_Y\_chr12\_51022911\_pol  
HERV17\_polputein  
HERV\_W\_chr7\_9105739\_syncytin\_p  
HERV9\_polputein  
HUERS-P3\_polputein  
ERVfrd\_AC004022  
PRIMA41\_polputein  
HERV\_H\_RGH1\_pol  
HERVHRGH2\_pol  
HERV\_H48I\_polputein  
HERV\_H\_RTVLH2\_pol  
HERVVFH21\_pol  
HERVrblike\_chr4\_109047953  
ChrY\_13790029\_693\_po\_C\_Xz12/11  
HERVS71\_polputein  
BaEV\_M7\_pol

VIQARYV-----  
LSKPLMR-----  
MIKPLMR-----  
--CTRVN-----  
EKEGKRERG-----  
VTYSFKSQG-----  
DIEAKRAAR-----  
TFLPTANQW-----  
ILLPAANQW-----  
ILLPATIQW-----  
VLIPEASQW-----  
STCQ-PPQG-----  
IYLPMESLQGFHWEVDGEIGGEMKLAGRWRKVVWVILVDAELVVGVC  
LLTPGANQW-----  
YLLPASQAH-----  
YLLPASQAH-----  
FVLPHSQTI-----  
IVQATSPP-----  
ARPPPEQTK-----  
FLHPLLSYFYNGHRTMTASSMIPVRSVACYPFLAPPWWVSPMQGKDRH  
F-IPRALKE-----  
F-IAPSPLE-----  
V-LPQKEAL-----

HERVR\_polputein  
AKR\_MLV\_MLOCG\_RT  
GaLV\_pol  
Chr3\_158587414\_1662\_po\_C\_Ez10/  
Chr3\_79627623\_1138\_po\_C\_Ez4/7  
Chr19\_20477244\_1350\_po\_C\_Ez10/  
Chr5\_111890459\_1626\_po\_C\_Ez10/  
ChrX\_48766518\_1600\_po\_C\_Ez6/3  
ChrX\_152580713\_1572\_po\_C\_Ez10/  
ChrX\_139287533\_1154\_po\_C\_Xz8/4  
Chr2\_52615786\_912\_po\_C\_Xz11/5  
HERV-E\_4\_1  
ChrY\_21962399\_1137\_po\_C\_Xz13/9  
ChrY\_8634032\_950\_po\_C\_Xz14/10  
Chr3\_126735360\_997\_po\_C\_Xz5/10  
Chr3\_126713203\_958\_po\_C\_Xz7/8  
Chr3\_75226118\_977\_po\_C\_Xz8/9  
Chr7\_6629919\_827\_po\_C\_Xz8/7  
Chr4\_9166812\_811\_po\_C\_Xz8/10  
Chr12\_8478642\_834\_po\_C\_Xz12/7  
Chr10\_15187175\_787\_po\_C\_Xz11/5  
Chr11\_71819740\_854\_po\_C\_Xz11/9  
Chr11\_71519974\_886\_po\_C\_Xz13/9  
Chr8\_7271441\_969\_po\_C\_Xz10/6  
Chr8\_11770066\_826\_po\_C\_Xz9/8  
Chr4\_4128362\_651\_po\_C\_Xz7/11  
Chr14\_50203955\_850\_po\_C\_Xz10/8  
Chr14\_50205291\_837\_po\_C\_Xz10/8  
Chr7\_6597120\_842\_po\_C\_Xz7/7  
Chr11\_71544658\_783\_po\_C\_Xz8/13  
Chr11\_67999520\_760\_po\_C\_Xz8/8  
Chr3\_75461975\_796\_po\_C\_Xz7/9  
Chr12\_52228939\_692\_po\_C\_Xz3/10  
Chr10\_15211234\_286\_po\_C\_Xz11/1  
Chr12\_100973302\_945\_po\_C\_Xz12/  
Chr19\_9685420\_817\_po\_C\_Xz6/10  
Chr13\_40936820\_719\_po\_C\_Xz9/10  
Chr7\_63858202\_1754\_po\_C\_Rz12/9  
ERV3\_chr7q21\_AC073210\_polputei  
Chr6\_110218096\_843\_po\_C\_Xz16/8  
Chr6\_110214535\_786\_po\_C\_Xz16/8  
ChrY\_3018841\_881\_po\_C\_Rz9/12  
ChrX\_86876098\_639\_po\_C\_Xz7/8  
Chr14\_68899917\_965\_po\_C\_Xz6/8  
ChrY\_23874437\_661\_po\_C\_Xz15/9  
ChrY\_27518418\_649\_po\_C\_Xz15/9  
ChrY\_25016892\_657\_po\_C\_Xz13/12  
ChrY\_19932937\_520\_po\_C\_Xz10/14  
ChrY\_20104614\_518\_po\_C\_Xz10/14  
Chr19\_58660155\_598\_po\_C\_Xz21/1  
Chr19\_58621153\_500\_po\_C\_Xz21/1  
Chr7\_139686987\_710\_po\_C\_Xz11/7  
Chr7\_137651301\_1097\_po\_C\_Pz13/  
Chr11\_29579197\_930\_po\_C\_Pz8/12  
Chr4\_117329205\_488\_po\_C\_Xz3/16  
Chr21\_38522185\_383\_po\_C\_Xz7/9  
Chr4\_70173370\_1049\_po\_C\_Xz11/8  
Chr4\_70022513\_788\_po\_C\_Kz10/12  
Chr14\_105225894\_1027\_po\_C\_Xz13  
Chr7\_119241536\_761\_po\_C\_Xz11/1  
ChrY\_22564970\_567\_po\_C\_Xz9/10  
Chr21\_14409346\_1477\_po\_C\_Pz5/6  
ChrX\_51259700\_1396\_po\_C\_Pz7/8  
Chr6\_64985396\_1041\_po\_C\_Xz11/1  
ChrY\_20355209\_659\_po\_C\_Xz7/11  
Chr3\_34567166\_523\_po\_C\_Xz8/6  
Chr3\_122072468\_245\_po\_C\_Xz9/9  
Chr11\_58788475\_541\_po\_C\_Xz8/22  
Chr6\_137421042\_373\_po\_C\_Xz6/9  
Chr4\_115910608\_550\_po\_C\_Pz8/12  
ChrY\_13743185\_977\_po\_C\_Xz14/8  
HERV15  
ChrX\_117198092\_983\_po\_C\_Xz8/8  
Chr19\_21166030\_1412\_po\_C\_Xz9/1  
Chr19\_21213743\_913\_po\_C\_Xz14/1  
Chr19\_15957774\_569\_po\_C\_Xz8/10  
Chr11\_77508681\_297\_po\_C\_Xz19/1

V-LPQKEAL-----  
V-MPDQFTF-----  
-----  
A-VPQLLGA-----  
-----  
A-VLQLLGA-----  
A-MAQLLGA-----  
A-VPQLLGA-----  
A-VPQLLGA-----  
A-VPQLLGA-----  
V-VPQLLGV-----  
A-VPQLLGA-----  
A-MPQMLGA-----  
S-SATVAGS-----  
S-CATAARS-----  
S-CATAARS-----  
A-VPQLLGA-----  
S-CATAARS-----  
A-APQLLGA-----  
A-VPQLLGA-----  
A-VPQLLGA-----  
A-VPQLLGA-----  
A-VPQLLGA-----  
A-APQLLGA-----  
A-VPQLRGA-----  
A-VPQLRGA-----  
A-VPQLPGA-----  
A-VPQLLGA-----  
A-APQLLGA-----  
A-VPQLRGA-----  
A-VPQLPGA-----  
A-VPQLLGA-----  
A-APQLLGA-----  
A-VPQLRGA-----  
A-VPQLPGA-----  
A-VPQLLGA-----  
I-SZGDIAA-----  
A-IPKMVAP-----  
A-IPKMVAP-----  
A-IPEMVAP-----  
A-IPEMVAP-----  
A-IPEMPLAP-----  
A-IPEMPLAP-----  
A-IPEMVAS-----  
A-NHEMLAP-----  
A-NHEMLAP-----  
A-NHEMLAP-----  
A-NHETVAL-----  
A-NHETVAL-----  
A-IPKMLAP-----  
A-IPKMLAP-----  
A-IPEMPLAP-----  
A-IPEIVTP-----  
A-IPETVAP-----  
A-ISEMVAP-----  
A-IPEMVAP-----  
A-IPEILAP-----  
A-ILEMLAP-----  
A-ITEMVAP-----  
P-MGDZLSL-----  
A-IPEMMTP-----  
A-IPEAIAP-----  
A-IPEAVAP-----  
R-LPIAPPP-----  
Y-HTRSNTPT-----  
A-IPETIAP-----  
A-IAEAIAP-----  
A-IPEAIAP-----  
ASYPRSNSP-----  
A-IPEAIAPPP-----  
A-IPETIAP-----  
A-IPETIAP-----  
D-VPETIAS-----  
A-VPETIAP-----  
A-IPETIAP-----  
-----  
GEGCLQPIPLP-----

|                                |                                                   |
|--------------------------------|---------------------------------------------------|
| Chr13_98250769_738_po_C_Xz7/13 | -----                                             |
| Chr6_39968183_513_po_C_Pz10/9  | -----                                             |
| Chr15_66867263_645_po_C_Xz11/1 | -----                                             |
| HERV18_polputein               | -----                                             |
| HERVIP10FH_polputein           | YNLKVLLLN-----                                    |
| MER66_polputein                | EVSLRCDP-----                                     |
|                                |                                                   |
| HERVI_polputein                | -----                                             |
| HERVIP10F_polputein            | -----                                             |
| HERVadp_AC005741               | -----                                             |
| HERV-PT47D                     | -----                                             |
| HERV_W_chr6_141432567_ERV9_lik | -----                                             |
| ERV9_PH1_RT                    | -----                                             |
| Chr13_54564403_572_po_C_Yz7/14 | -----                                             |
| HERV_Y_chr12_51022911_pol      | -----                                             |
| HERV17_polputein               | -----                                             |
| HERV_W_chr7_9105739_syncytin_p | -----                                             |
| HERV9_polputein                | -----                                             |
| HUERS-P3_polputein             | -----                                             |
| ERVfrd_AC004022                | VSLLRVYSESTLQTVLGRAPISIPFFFSAIMQIGAIPIKVILEKMGPKM |
| PRIMA41_polputein              | -----                                             |
| HERV_H_RGH1_pol                | -----                                             |
| HERVHRGH2_pol                  | -----                                             |
| HERV_H48I_polputein            | -----                                             |
| HERV_H_RTVLH2_pol              | -----                                             |
| HERVFH21_pol                   | -----                                             |
| HERVRblike_chr4_109047953      | LQVFLDLKHWTGSQMMG-----VTKANVQNGCTTFNDPGHG         |
| ChrY_13790029_693_po_C_Xz12/11 | -----                                             |
| HERVS71_polputein              | -----                                             |
| BaEV_M7_pol                    | -----                                             |
| HERVR_polputein                | -----                                             |
| AKR_MLV_MLOGC_RT               | -----                                             |
| GaLV_pol                       | -----                                             |
| Chr3_158587414_1662_po_C_Ez10/ | -----                                             |
| Chr3_79627623_1138_po_C_Ez4/7  | -----                                             |
| Chr19_20477244_1350_po_C_Ez10/ | -----                                             |
| Chr5_111890459_1626_po_C_Ez10/ | -----                                             |
| ChrX_48766518_1600_po_C_Ez6/3  | -----                                             |
| ChrX_152580713_1572_po_C_Ez10/ | -----                                             |
| ChrX_139287533_1154_po_C_Xz8/4 | -----                                             |
| Chr2_52615786_912_po_C_Xz11/5  | -----                                             |
| HERV-E_4_1                     | -----                                             |
| ChrY_21962399_1137_po_C_Xz13/9 | -----                                             |
| ChrY_8634032_950_po_C_Xz14/10  | -----                                             |
| Chr3_126735360_997_po_C_Xz5/10 | -----                                             |
| Chr3_126713203_958_po_C_Xz7/8  | -----                                             |
| Chr3_75226118_977_po_C_Xz8/9   | -----                                             |
| Chr7_6629919_827_po_C_Xz8/7    | -----                                             |
| Chr4_9166812_811_po_C_Xz8/10   | -----                                             |
| Chr12_8478642_834_po_C_Xz12/7  | -----                                             |
| Chr10_15187175_787_po_C_Xz11/5 | -----                                             |
| Chr11_71819740_854_po_C_Xz11/9 | -----                                             |
| Chr11_71519974_886_po_C_Xz13/9 | -----                                             |
| Chr8_7271441_969_po_C_Xz10/6   | -----                                             |
| Chr8_11770066_826_po_C_Xz9/8   | -----                                             |
| Chr4_4128362_651_po_C_Xz7/11   | -----                                             |
| Chr14_50203955_850_po_C_Xz10/8 | -----                                             |
| Chr14_50205291_837_po_C_Xz10/8 | -----                                             |
| Chr7_6597120_842_po_C_Xz7/7    | -----                                             |
| Chr11_71544658_783_po_C_Xz8/13 | -----                                             |
| Chr11_67999520_760_po_C_Xz8/8  | -----                                             |
| Chr3_75461975_796_po_C_Xz7/9   | -----                                             |
| Chr12_52228939_692_po_C_Xz3/10 | -----                                             |
| Chr10_15211234_286_po_C_Xz11/1 | -----                                             |
| Chr12_100973302_945_po_C_Xz12/ | -----                                             |
| Chr19_9685420_817_po_C_Xz6/10  | -----                                             |
| Chr13_40936820_719_po_C_Xz9/10 | -----                                             |
| Chr7_63858202_1754_po_C_Rz12/9 | -----                                             |
| ERV3_chr7q21_AC073210_polputei | -----                                             |
| Chr6_110218096_843_po_C_Xz16/8 | -----                                             |
| Chr6_110214535_786_po_C_Xz16/8 | -----                                             |
| ChrY_3018841_881_po_C_Rz9/12   | -----                                             |
| ChrX_86876098_639_po_C_Xz7/8   | -----                                             |
| Chr14_68899917_965_po_C_Xz6/8  | -----                                             |
| ChrY_23874437_661_po_C_Xz15/9  | -----                                             |
| ChrY_27518418_649_po_C_Xz15/9  | -----                                             |



|                                |                                                     |
|--------------------------------|-----------------------------------------------------|
| ChrY_25016892_657_po_C_Xz13/12 | -----                                               |
| ChrY_19932937_520_po_C_Xz10/14 | -----                                               |
| ChrY_20104614_518_po_C_Xz10/14 | -----                                               |
| Chr19_58660155_598_po_C_Xz21/1 | -----                                               |
| Chr19_58621153_500_po_C_Xz21/1 | -----                                               |
| Chr7_139686987_710_po_C_Xz11/7 | -----                                               |
| Chr7_137651301_1097_po_C_Pz13/ | -----                                               |
| Chr11_29579197_930_po_C_Pz8/12 | -----                                               |
| Chr4_117329205_488_po_C_Xz3/16 | -----                                               |
| Chr21_38522185_383_po_C_Xz7/9  | -----                                               |
| Chr4_70173370_1049_po_C_Xz11/8 | -----                                               |
| Chr4_70022513_788_po_C_Kz10/12 | -----                                               |
| Chr14_105225894_1027_po_C_Xz13 | -----                                               |
| Chr7_119241536_761_po_C_Xz11/1 | -----                                               |
| ChrY_22564970_567_po_C_Xz9/10  | -----                                               |
| Chr21_14409346_1477_po_C_Pz5/6 | -----                                               |
| ChrX_51259700_1396_po_C_Pz7/8  | -----                                               |
| Chr6_64985396_1041_po_C_Xz11/1 | -----                                               |
| ChrY_20355209_659_po_C_Xz7/11  | -----                                               |
| Chr3_34567166_523_po_C_Xz8/6   | -----                                               |
| Chr3_122072468_245_po_C_Xz9/9  | -----                                               |
| Chr11_58788475_541_po_C_Xz8/22 | -----                                               |
| Chr6_137421042_373_po_C_Xz6/9  | -----                                               |
| Chr4_115910608_550_po_C_Pz8/12 | -----                                               |
| ChrY_13743185_977_po_C_Xz14/8  | -----                                               |
| HERV15                         | -----                                               |
| ChrX_117198092_983_po_C_Xz8/8  | -----                                               |
| Chr19_21166030_1412_po_C_Xz9/1 | -----                                               |
| Chr19_21213743_913_po_C_Xz14/1 | -----                                               |
| Chr19_15957774_569_po_C_Xz8/10 | -----                                               |
| Chr11_77508681_297_po_C_Xz19/1 | -----                                               |
| Chr13_98250769_738_po_C_Xz7/13 | -----                                               |
| Chr6_39968183_513_po_C_Pz10/9  | -----                                               |
| Chr15_66867263_645_po_C_Xz11/1 | -----                                               |
| HERV18_polputein               | -----                                               |
| HERVIP10FH_polputein           | -----                                               |
| MER66_polputein                | -----                                               |
| <br>                           |                                                     |
| HERVI_polputein                | ----EDLVSTYLRLTHWGSQAMCDAVLR-----VYGCIRIYTLAKQVT    |
| HERVIP10F_polputein            | ----EVLSQLHOGTHWGPQAMCDAVLR-----VYGCIGIYTTLAKQVT    |
| HERVadp_AC005741               | ----ELMSILHKGSHWGPQALCDAILR-----NYVCIGIZTLTKQVC     |
| HERV-PT47D                     | ----DIFPSYLQPRKQNSHTRNAHTIR-----IYIZ-----           |
| HERV_W_chr6_141432567_ERV9_lik | ----RDRQEVVRKRETKK---KSKRKSG-----SKEKTVY-----       |
| ERV9_PH1_RT                    | ----KFLSTHARQFSIGS---QPIASQ-----TVEEIMKSILTLQS      |
| Chr13_54564403_572_po_C_Yz7/14 | ----QDLPLEMLIEDPZYGVIPSRKPS-----STQKKKZNEEPHED      |
| HERV_Y_chr12_51022911_pol      | ----ILLKILHQTFFHLGIDSTIKMAKSL-----FTGAGLVKTIKQIV    |
| HERV17_polputein               | ----KLLKTLHQTFFHLGIDSTHQMAKSL-----FTGPGPLFKTIKQIV   |
| HERV_W_chr7_9105739_syncytin_p | ----KLLKTLHQTFFHLGIDSTHQMAKSL-----FTGPGPLFKTIKQIV   |
| HERV9_polputein                | ----KILKTLHQTFFHMGIENHQMATS-----FTGPNLLWAFQQVV      |
| HUERS-P3_polputein             | ----K-LKILHK-LHLGKDKTYQCAQRL-----FSGENLLKTVKQVV     |
| ERVfrd_AC004022                | EPPNGVIKSFYNFFHLAKDSLGIQICKZV-----FSGKGLNKTIQQVC    |
| PRIMA41_polputein              | ----KIVKHLHDSTHLGRDSLFLQMSQL-----FIGKGLLTKVQVT      |
| HERV_H_RGH1_pol                | ----SILSSFHNLFHVGYKPLDRLLLEPL-----ISFPSWKSILKEIT    |
| HERVHRGH2_pol                  | ----SILSSFHNLFHVGYKPLACLLGPL-----ISFPSWKSILKEIT     |
| HERV_H48I_polputein            | ----PHLQSLHNSFHVGYKPLLQLLRPI-----LTCPHLSSRVREIT     |
| HERV_H_RTVLH2_pol              | -----LRTL-----ISFPSWKSIPKEIT                        |
| HERVHF21_pol                   | ----EILTSLHQSFHIGARPLYLLCPY-----FSXPXLFSLKIDIT      |
| HERVRblike_chr4_109047953      | SFLHPILKYIHDGTTFGQDASLTSYRSI-----RKG--MRAHLESII     |
| ChrY_13790029_693_po_C_Xz12/11 | ----TLISRLHSTTHLR-GVKLAQLLRSHFR-----SLRLQNSANQAAL   |
| HERVS71_polputein              | ----TLINHLHSATHLG-GIKLAQLLRSHFN-----IPHLQDLTNQAAL   |
| BaEV_M7_pol                    | ----AMIQQMHAWTHLG-NRKLKLLIEKTD----FLIPRASTLIEQVTS   |
| HERVR_polputein                | ----AMIQQMHAWTHLG-NRKLKLLIEKTD----FLIPRASTLIEQVTS   |
| AKR_MLV_MLOCG_RT               | ----ELLDLFLHQLTHLS-FSKMKALLERSHSP---YMLNRDRTLKKNITE |
| GaLV_pol                       | ----EFIKRHLQLTHLG-PEKLLQLVNRTS----LLIPNLQSAVREVTS   |
| Chr3_158587414_1662_po_C_Ez10/ | ----TLIQARNHASR--QESLEKLLG-----RLLSLTLASPQSSSTT     |
| Chr3_79627623_1138_po_C_Ez4/7  | -----                                               |
| Chr19_20477244_1350_po_C_Ez10/ | ----TIVLAMHETTHLG-QESFEKLLA-----GTSTSHASQPLPKQYQT   |
| Chr5_111890459_1626_po_C_Ez10/ | ----TIILAMHETTHLG-QESHEKLLS-----CYFYISYLPALAKAVAQ   |
| ChrX_48766518_1600_po_C_Ez6/3  | ----TIVLAMHETTHPG-QESLEKLLG-----RYFYISQLPALAKAVTQ   |
| ChrX_152580713_1572_po_C_Ez10/ | ----TIVLAMHETTHLA-QESLEKLLG-----QYFYVSHLPALAKAVAQ   |
| ChrX_139287533_1154_po_C_Xz8/4 | ----AVVLAVHETTHVG-QESLEKLS-----RYFYISHLPALAKTVAQ    |
| Chr2_52615786_912_po_C_Xz11/5  | ----AVVLAVREITHLG-QE---LLG-----QCFYVWHSALAKTVVR     |
| HERV-E_4_1                     | ----AVVLAVHKTTHLG-QESLEKLLG-----WYFYISHLSALAKTVTQ   |
| ChrY_21962399_1137_po_C_Xz13/9 | ----AVILAVHETTHLG-QMSFEKLLG-----WYFYILHLSALAKTVVQ   |
| ChrY_8634032_950_po_C_Xz14/10  | ----HSRIEHAQNTHLG-QESLEELG-----QYFYISHLPALAKAVAR    |
| Chr3_126735360_997_po_C_Xz5/10 | ----CSCTGCARN-HPL-RSGVTKFVR-----LVFLH--LASVSPCHNG   |

Chr3\_126713203\_958\_po\_C\_Xz7/8 ----CSCTGCVRTTHRG-QESLEKLLG-----WYFFISPLSALAKTVRQ  
Chr3\_75226118\_977\_po\_C\_Xz8/9 ----AVVLAVQETTHRG-QQSLEKLLG-----RYFYISSFSALAKTVRQ  
Chr7\_6629919\_827\_po\_C\_Xz8/7 ----CSVTLAVQETSHRG-QESLEKLLG-----WYFISPLSALAKTVRQ  
Chr4\_9166812\_811\_po\_C\_Xz8/10 ----AVVLAVQETTHRG-QESLEKLLG-----RYFYISPLSALAKTVRQ  
Chr12\_8478642\_834\_po\_C\_Xz12/7 ----AVVLAVQETTHRG-QESLEKLLG-----RYFYITPWSALAKTVKQ  
Chr10\_15187175\_787\_po\_C\_Xz11/5 ----AVVLAVQETTHRG-QESLEKLLG-----RYFYISPLSALAKTVRQ  
Chr11\_71819740\_854\_po\_C\_Xz11/9 ----AVVLAVQETTHRG-QESLEKLLG-----RYFYISPLSALAKTVRQ  
Chr11\_71519974\_886\_po\_C\_Xz13/9 ----AVVLAVQETTHRG-QESLEKLLG-----WYFYISPLSALAKTVRQ  
Chr8\_7271441\_969\_po\_C\_Xz10/6 ----AVVLAVQENTHRG-QESLEKLLG-----RYFYISPLSLAKTVRQ  
Chr8\_11770066\_826\_po\_C\_Xz9/8 ----AVVLAVQETTHRG-QESLEKLLG-----WYFYISPLSALAKTVRQ  
Chr4\_4128362\_651\_po\_C\_Xz7/11 ----AVLAVLHLTFVS-P-----AKTVRQ  
Chr14\_50203955\_850\_po\_C\_Xz10/8 ----AVVLAVQETTHLG-QESLKKLLG-----QYFYISPFSAKTVRQ  
Chr14\_50205291\_837\_po\_C\_Xz10/8 ----AVVLAVQETTHLG-QESLKKLLG-----QYFYISPFSAKTVRQ  
Chr7\_6597120\_842\_po\_C\_Xz7/7 ----AVVLAVQETTHLG-QESLKKLLG-----WYFISPLSALAKTVRQ  
Chr11\_15211234\_286\_po\_C\_Xz1/13 ----AVVLAVQETTHLG-QESLQKVV-----PVLHSPFLAITQAVCR  
Chr11\_67999520\_760\_po\_C\_Xz8/8 ----AVVLAVQETTYRG-QESLEKLLG-----RYFYISRFSAKTVRQ  
Chr3\_75461975\_796\_po\_C\_Xz7/9 ----AVVLAVQETTHVG-QESLEKLLA-----RYFYILRFPALAKTVRQ  
Chr12\_52228939\_692\_po\_C\_Xz3/10 ----AVLAVHETTHLS-ES-LEKLLG-----WYFYISHLSALAKTVQ  
Chr10\_15211234\_286\_po\_C\_Xz1/1 ----CSCTG----THLC-QESLEKLLG-----WYFYISHLSALAKTVRQ  
Chr12\_100973302\_945\_po\_C\_Xz12/7 ----TIVLAMHETTHLG-QESLEKLLG-----RYFYMSHLPALQTS-I  
Chr19\_9685420\_817\_po\_C\_Xz6/10 ----TIVLAMHETTHLG-QESLEKLLG-----RYFYISHLPALKAVA-Q  
Chr13\_40936820\_719\_po\_C\_Xz9/10 ----NNTVGVVHCTLC-D-MIAYILG-----RYSFZYHSECTPCDIIH  
Chr7\_63858202\_1754\_po\_C\_Xz12/9 ----KFVQZLHH-ELVG-KTALETLLG-----RHFYVPRLTAITQAVCE  
ERV3\_chr7q21\_AC073210\_polputei ----KFVKZLHH-ELVG-KTALETLLG-----RHFYVPRLTAITQAVCE  
Chr6\_110218096\_843\_po\_C\_Xz16/8 ----KFVZQFQHGNNHM-ETALETLLG-----HRFYPRLTAITZAI  
Chr6\_110214535\_786\_po\_C\_Xz16/8 ----KFVZQFQHGNNHM-ETALETLLG-----HRFYPRLTAITZAI  
ChrY\_3018841\_881\_po\_C\_Rz9/12 ----KFIRQFHZGTHMG-KMALETLLG-----RHFYVPRLTAITQAI  
ChrX\_86876098\_639\_po\_C\_Xz7/8 ----KFVRQFHZGTHMG-KMALETLLG-----RHFYVPRLTAITQAI  
Chr14\_68899917\_965\_po\_C\_Xz6/8 ----KFVRQFHQGTHMG-KTALEMLL-----HFFYVRLRLTAITQAV  
ChrY\_23874437\_661\_po\_C\_Xz15/9 ----KFVKQFHQGTHMG-KMSLKTLG-----HFFYVQLTIVTZSVCK  
ChrY\_27518418\_649\_po\_C\_Xz15/9 ----KFVKQFHQGTHMG-KMSLKTLG-----HFFYVQLTIVTZSVCK  
ChrY\_25016892\_657\_po\_C\_Xz13/12 ----KFVKQFHQGTHMG-KMSLKTLG-----HFFYVQLCHHL-IVCK  
ChrY\_19932937\_520\_po\_C\_Xz10/14 ----KFVRQFYQGTHMG-KTSLKTLG-----HHVYVLRPLAITZSI  
ChrY\_20104614\_518\_po\_C\_Xz10/14 ----KFVRQFYQGTHMG-KTSLKTLG-----HHVYVLRPLAITZSI  
Chr19\_58660155\_598\_po\_C\_Xz21/1 ----KFVQFQTHQETHIR-KTALNVKVPFLT-KVPFYVWLSVAIVAZAI  
Chr19\_58621153\_500\_po\_C\_Xz21/1 ----KFVKQIHQENHIR-KTALATLCS--AN-ESAFYVWLSAVTQDVCE  
Chr7\_139686987\_710\_po\_C\_Xz11/7 ----KFVKQIHQGTHMG-KRALMML-----CHLYVPRVSAITZAVCK  
Chr7\_137651301\_1097\_po\_C\_Pz13/7 ----KFVRQFHQGTHIRKTALEML-----HFFYVRLTAITRAVCK  
Chr11\_29579197\_930\_po\_C\_Pz8/12 ----KFVKQFHQGTHIG-KTALETLL-----HFFYMPRLTIPQAVCE  
Chr4\_117329205\_488\_po\_C\_Xz3/16 ----KFVKEFHQGTHMG-KMALEMLR-----S--FLSFLCANTHCHHP  
Chr21\_38522185\_383\_po\_C\_Xz7/9 ----KFVKQFHQGTHMG-KTALQTLG-----CHLYVPRLNALTAITQAV  
Chr4\_70173370\_1049\_po\_C\_Xz11/8 ----RFAKQF-QGTHMR-KTVLETZLG-----CHFVYVWLTAITZAI  
Chr4\_70022513\_788\_po\_C\_Kz10/12 ----RFVKQFHQGTHMG-KMALETLL-----HFFYVQLTIVTZSVCK  
Chr14\_105225894\_1027\_po\_C\_Xz13/13 ----RFVKQFHQGTHMG-KTALETLL-----CHFVYVWLTAITQAVFN  
Chr7\_119241536\_761\_po\_C\_Xz11/1 ----KWFEQVCKTIPLR--NSYGENGT-----RNYVVPWLTAITQDICK  
ChrY\_22564970\_567\_po\_C\_Xz9/10 ----RFVNQFHQGTHMG--RQLETLL-----WHFVYVRLSPITZAI  
Chr21\_14409346\_1477\_po\_C\_Pz5/6 ----QFIMQFHQGTHMG-KTALEILVG-----QYFYVPLTAITRAICE  
ChrX\_51259700\_1396\_po\_C\_Pz7/8 ----RLIKQLHQGTQIR-KTALETLVG-----ZYFFVPHLTAITGAICE  
Chr6\_64985396\_1041\_po\_C\_Xz11/1 ----AQF IKFHQGMHMG-KTALETLVG-----QHfyVHLTAITAQAICE  
ChrY\_20355209\_659\_po\_C\_Xz7/11 ----RFIKQFHHGMHVR-KTALETLAG-----QPfyVPRLTAITRAICE  
Chr3\_34567166\_523\_po\_C\_Xz8/6 ----QFIKQFHQETHMG-KTALETVRG-----WHFYVPLTAITRALCE  
Chr3\_122072468\_245\_po\_C\_Xz9/9 ----RFIKQFHQGKHM-KTALETLVG-----RHFYVLLTAITQAVCE  
Chr11\_58788475\_541\_po\_C\_Xz8/22 ----WFIKQFYQGTHMG-KIALETLVG-----WHFYVPHLTAITGAVSE  
Chr6\_137421042\_373\_po\_C\_Xz6/9 ----WFIKQFHQGTHMG-KTALESCR-----MAFLLSLTAITRAIYE  
Chr4\_115910608\_550\_po\_C\_Pz8/12 ----QFIKQFHQGTHME-KTALETLVG-----WHFYVPLRIAITRTICE  
ChrY\_13743185\_977\_po\_C\_Xz14/8 ----RFVKQIHQGTHIG-RTALEILIG-----QHfyVWLSAITHAVCE  
HERV15 ----RFVKQIHQGTHIG-RTALETLIG-----QHfyVWLSAITHAVCE  
ChrX\_117198092\_983\_po\_C\_Xz8/8 ----RFVKQIHQRTHTG----LETLVG-----QHfyVPRLSAITHAVCE  
Chr19\_21166030\_1412\_po\_C\_Xz9/1 ----RFVKQIHQGTHAG-STALETLIG-----QHfyVPRLSAITRAVCE  
Chr19\_21213743\_913\_po\_C\_Xz14/1 ----RFVKQIHQGTHIG-RMALETDRD-----TSMCHSSLQPPVLFMNN  
Chr19\_15957774\_569\_po\_C\_Xz8/10 -----ETSPKSWG-----TSMCHSSLQPPVLFMNN  
Chr11\_77508681\_297\_po\_C\_Xz19/1 ----WLLKQHYLITVLEVSLLGRGKLVFFL-TLALPVTFGLVNECIFIF  
Chr13\_98250769\_738\_po\_C\_Xz7/13 ----VHERKGMALVLTQVIR-LWHCPVAYLSKQLDSVAL  
Chr6\_39968183\_513\_po\_C\_Pz10/9 -----EWPP-----  
Chr15\_66867263\_645\_po\_C\_Xz11/1 ----GVI IKZVNVAGN-----  
HERV18\_polputein ----DVALWLHRKLGAGGKLMQOVNK-----CWGLSLPTQDIWEAC  
HERVIP10FH\_polputein ----VKLLRNSLCARCIRKVKYTFG-----KRIIRR  
MER66\_polputein ----TLVAKFRPRPQGGKWDSTCKRGD-----IWCLLLDNQIQGKNN

HERVI\_polputein  
HERVIP10F\_polputein  
HERVadp\_AC005741  
HERV-PT47D  
HERV\_W\_chr6\_141432567\_ERV9\_lik  
ERV9\_PHL\_RT  
Chr13\_54564403\_572\_po\_C\_Yz7/14

DSCLICKKTSKQILRPPLGK---RFR-AKTISKCS----INYT----E  
DSCLVCKKTNRHTIKRPLGK---RNPGLRPFQSIQ----VDYT----E  
GSCVICQSLNKM LARKQAMGG---RPPGLRPFQSIQ----VDFR----E  
--CTACPIINVZLGKPCRRGG---RWGNPLSTYQAL----ILDN----H  
-----PIPLKARATPS---KSG-----  
QIRLFGSSDSPKPLGLDLLTA---EKGLCTFLGEE----CCFY----T  
IVSSPQDQPPKKEKYLCLQL---TSRNYLKPFTKP---FTLA----L

HERV\_Y\_chr12\_51022911\_pol  
HERV17\_polputein  
HERV\_W\_chr7\_9105739\_syncytin\_p  
HERV9\_polputein  
HUERS-P3\_polputein  
ERVfrd\_AC004022  
PRIMA41\_polputein  
HERV\_H\_RGH1\_pol  
HERVHRGH2\_pol  
HERV\_H48I\_polputein  
HERV\_H\_RTVLH2\_pol  
HERVVFH21\_pol  
HERVRblike\_chr4\_109047953  
ChrY\_13790029\_693\_po\_C\_Xz12/11  
HERVS71\_polputein  
BaEV\_M7\_pol  
HERVR\_polputein  
AKR\_MLV\_MLOCG\_RT  
GalV\_pol  
Chr3\_158587414\_1662\_po\_C\_Ez10/  
Chr3\_79627623\_1138\_po\_C\_Ez4/7  
Chr19\_20477244\_1350\_po\_C\_Ez10/  
Chr5\_111890459\_1626\_po\_C\_Ez10/  
ChrX\_48766518\_1600\_po\_C\_Ez6/3  
ChrX\_152580713\_1572\_po\_C\_Ez10/  
ChrX\_139287533\_1154\_po\_C\_Xz8/4  
Chr2\_52615786\_912\_po\_C\_Xz11/5  
HERV-E\_4\_1  
ChrY\_21962399\_1137\_po\_C\_Xz13/9  
ChrY\_8634032\_950\_po\_C\_Xz14/10  
Chr3\_126735360\_997\_po\_C\_Xz5/10  
Chr3\_126713203\_958\_po\_C\_Xz7/8  
Chr3\_75226118\_977\_po\_C\_Xz8/9  
Chr7\_6629919\_827\_po\_C\_Xz8/7  
Chr4\_9166812\_811\_po\_C\_Xz8/10  
Chr12\_8478642\_834\_po\_C\_Xz12/7  
Chr10\_15187175\_787\_po\_C\_Xz11/5  
Chr11\_71819740\_854\_po\_C\_Xz11/9  
Chr11\_71519974\_886\_po\_C\_Xz13/9  
Chr8\_7271441\_969\_po\_C\_Xz10/6  
Chr8\_11770066\_826\_po\_C\_Xz9/8  
Chr4\_4128362\_651\_po\_C\_Xz7/11  
Chr14\_50203955\_850\_po\_C\_Xz10/8  
Chr14\_50205291\_837\_po\_C\_Xz10/8  
Chr7\_6597120\_842\_po\_C\_Xz7/7  
Chr11\_71544658\_783\_po\_C\_Xz8/13  
Chr11\_67999520\_760\_po\_C\_Xz8/8  
Chr3\_75461975\_796\_po\_C\_Xz7/9  
Chr12\_52228939\_692\_po\_C\_Xz3/10  
Chr10\_15211234\_286\_po\_C\_Xz11/1  
Chr12\_100973302\_945\_po\_C\_Xz12/  
Chr19\_9685420\_817\_po\_C\_Xz6/10  
Chr13\_40936820\_719\_po\_C\_Xz9/10  
Chr7\_63858202\_1754\_po\_C\_Rz12/9  
ERV3\_chr7q21\_AC073210\_polputei  
Chr6\_110218096\_843\_po\_C\_Xz16/8  
Chr6\_110214535\_786\_po\_C\_Xz16/8  
ChrY\_3018841\_881\_po\_C\_Rz9/12  
ChrX\_86876098\_639\_po\_C\_Xz7/8  
Chr14\_68899917\_965\_po\_C\_Xz6/8  
ChrY\_23874437\_661\_po\_C\_Xz15/9  
ChrY\_27518418\_649\_po\_C\_Xz15/9  
ChrY\_25016892\_657\_po\_C\_Xz13/12  
ChrY\_19932937\_520\_po\_C\_Xz10/14  
ChrY\_20104614\_518\_po\_C\_Xz10/14  
Chr19\_58660155\_598\_po\_C\_Xz21/1  
Chr19\_58621153\_500\_po\_C\_Xz21/1  
Chr7\_139686987\_710\_po\_C\_Xz11/7  
Chr7\_137651301\_1097\_po\_C\_Pz13/  
Chr11\_29579197\_930\_po\_C\_Pz8/12  
Chr4\_117329205\_488\_po\_C\_Xz3/16  
Chr21\_38522185\_383\_po\_C\_Xz7/9  
Chr4\_70173370\_1049\_po\_C\_Xz11/8  
Chr4\_70022513\_788\_po\_C\_Kz10/12  
Chr14\_105225894\_1027\_po\_C\_Xz13  
Chr7\_119241536\_761\_po\_C\_Xz11/1  
ChrY\_22564970\_567\_po\_C\_Xz9/10

RACEVCQRNNPLPYCZAPSGE---QRTGHYPGEGWQ----LDFT-----H  
RACEVCQRNNPLPYRQAPSGE---QRTGHYPGEDWQ----LDFT-----H  
RACEVCQRNNPLPYRQAPSGE---QRTGHYPGEDWQ----DFT-----H  
KTCEVCQRNNPLVHCKAHLGE---QRIGHYPGEDWQ----LDFT-----I  
NACEVCLKNNPLNRRLLPQPQ---QRMESYLGEDWQ----IDFT-----H  
QAYTLCTINNSQRGKPPPLISP-IQRRSTYPGEDWQ----MDFT-----H  
QACELCARNNPNQSLPPLVRFVQHRGTYPGEDWQ----IDYT-----Q  
SQCSIA-STTPQGLFRPPPPF--THQARGFAPAQDWQ----IDFT-----H  
SQCSICYSATPQGLFRPPPPF--THKARGFAPAQDWQ----IDFT-----H  
QSCSICHSVSPQGLRPPPPF--THQARGQVPGQDWQ----VDFT-----H  
SQCSICYSTNPQGLFRPPPPF--THQAZGFAPTQDWQ----ISFTZ-----H  
SNCHICSVTSSQGLXSPSIP--THQLRGTLPGEDWQ----IDFT-----H  
LRCHFCTKNEPNNHNTGQPGQ---QGRGKQPLENWQ----IDFTQ-----M  
W-CMACAQVNAKQGGPKPISG---HCLRGNSPKRZE---IDFT--EIKP  
W-CMDCAQVNNKQVLSAQ---STLQGGSPRERWE---IDFT--EIKP  
A-CKVCQVNAAGATRVPAQ---KRTRGNRPVYWE---IDFT--EVKP  
A-CKVCQVNAAGATRVPAQ---KRTRGNRPVYWE---IDFT--EVKP  
T-CKACAQVNAKSAVKQG---TRVRGHRPGTHWE---IDFT--EIKP  
Q-CQACAMTNVTTYRETG---KRQRGDRPGVYWE---IDFT--EIKP  
VCYLLTAQCEAR--PHFPPS---IQVYGAASFEDLHRNAFEDFT--EMLK  
-----AQCEAR--PHCSAR---HTSLWSGSFEDLQ----VDFT--KMLK  
VRYLPTAQYEAM--SHCSAW---HTSYVAAPFQDPQ----VDFT--EMC-  
Q-CIICQQHNARZGPTVPPG---IQAYGAAPFEDFE---IDFT--EMPK  
QQCVTCQQHNARQGGPTVPPS---IQAYGAAPFEDLQ----VDFT--EMPK  
W-CVTCQHIHDRQGGPTVPPG---IQAYGAPFEDLQ----VEFT--EMPK  
R-CVTCRQHNAKAPLFLPA---YKAYGAAPFEDLQ----VDFT--EMPK  
Q-RVTCRQHNAKQGGPTVTPG---MQTYGAAPFEDLQ----VDFT--EMPK  
R-CVTCRQHNAKQGGPAVPPG---IQAYGAAPFEDLQ----VDFT--EMPK  
Q-CVTCQHNARQGGPTAPPG---IQSYGAAPFEDLQ----VDFT--EMPK  
W--CVTCQANARQGGPTVPPF---IQAYGAAPFEDIQG---DFT--EMLQ  
E-AGVLPADSLMRGKQVFFRP---AYELRAALFEGQLQ----VDFT--EVP  
R-CVTCRQHDARQGGPAVPHG---IRAYGAAPFEGQLQ----VDFT--EMPK  
R-CVTCRQHDARQGGPAVPPG---IRAYGAALFEGQLQ----VDFT--EMPK  
W-CVTCQQHDARQGPVPPG---IRAYGAAPFEGQLQ----LDFT--EMPK  
R-CVTCRQHDARQGGPAIPPG---IRAYGAAPFEGGLK----VDFT--EMPK  
R-CAADSMRMRG--KVAVPPG---IRAYGAAP--EGLQ----VDFT--ETPK  
R-CVTCRQHDARQGGAAVPPG---IRAYGAAPFEGQLQ----VDFT--ETPK  
P-CVTCRQHDARQGLAVLPG---IRASGAAPFEGQLQ----VDFT--EMSK  
R-CVTCRQHDARQGPVPHG---IZAYGAALFEGQLQ----VDFT--EMPK  
R-CVTCRQHDARQGPVPPG---IRACGAAPFEGQLQ----VDFT--EMPK  
V-CYLR-QHDARQGGPAVPPG---IRAYGAAPFEGQLQ----VDFT--EMSK  
R-CVTCRLHDARQGGPAVPPG-----  
R-CVTCRQHARQGGPAVPPG---IQAYGAAAFEDLQ----VDFT--EMPE  
R-CVSCRQHARQGGPAVPPG---IQAYGAAAFEDLQ----VDFT--EMPE  
R-CVSCRQHDARQGGPAVPPG---IQAYGAAPFEDLQ----VDFT--EMPK  
R-CVTCRQHARQGGPAVPPG---IQAYGAAPFEDLQ----VDFT--EMPK  
R-CVTCRQHARQGGPAVPPG---IQAYGAAPLEDLQ----VDFT--EMPK  
P-CVTCRQHDARQGGPAVPPG---IRAYGEAPFEDLQ----VDFT--EMPK  
R-CVTCZQHARQGGPAVPPG---IKAYGAAPFEDLQ----VDFT--EMPK  
W-CVTCCLQPNARQGGPAVQPS---VQAYGAVPFEDLQ----VDFT--EMPK  
V-CITDLLTAQCEAGPTVLPQ---IQAYGAVPFEDLQ----VNFT--EMPK  
W-CVTCRQHARQGLTVPPG---IQAY-VRLLRIF----VDFT--EMPK  
NILERCAANITEGVPVTLFV---ISZRDVTPNVTGG-----VHS--VILF  
Q-YLTCAQNNPZQWPTRPPG---IQEIGTMPENLL----MD-T--ELPQ  
Q-YLTCAQNNPZQWPTRPPG---IQEIGTMPENLL----MD-T--ELPQ  
Q-CLICAQNNPZQGLTRPPG---IQEMGATPCENLL----MDFT--ELPS  
Q-CLICAQNNPZQGLTRPPG---IQEMGATPCENLL----MDFT--ELPS  
Q-YLTCAQNNPZQWPTRPPG---FRKYGPHPVN-LL----MDFT--ELPQ  
Q-YLTCAQ--QPTTEAHQAPG---IQEIGAAPCKNLL----MDFT--ELPQ  
Q-CLICAQNNPZQGGPTVPPG---IQEMGATPCENLL----MDFT--ELPR  
Q-CLTCAQNNPZQGGPTVPLG---IQEMGATPCENLL----RNFT--EMPQ  
Q-CLTCAQNNPZQGGPTVPLG---IQEMGATPCENLL----RNFT--EMPQ  
Q-CLTCAQNNPZQGGPTVPLG---IQEMGATPCENLL----RNFT--EMPQ  
Q-CLTCAQNNPZQGGPTVPLG---IQEMGATPCENLL----RNFT--EMPQ  
Q-CLTCAQNNPZQGGPTVPLG---IQETGATPCKELL----INFT--KLPQ  
Q-CLTCAQNNPZQGGPTVPLG---IQETGATPCKELL----INFT--KLPQ  
Q-CLTCAQNNPZQGGPTVPLG---IQEAGAMPENLV----INFT--ELLR  
Q-ZLTCAENNPZQGGPTVPLG---IQEAGAMPENLV----INFT--ELLR  
Q-ZLTCAENNPZQGGPTVPPG---IQEIGAMPCK-TY----LQTT--ELPR  
Q-YLICAQ--PTARAHSAAG---IQZIGATPCKNLL----MDFT--ELPR  
Q-CLICVQNNPZQGGPTVPPG---IQEMGATPCENLV----MDFT--ELPR  
R-CLQTMNSN-----LCPK---QPMTRAHSA--PR----IQKM--GASP  
Q-CLTCAQNNPZQGGPTVPPG---SAPG---NLGNWHTLZKPA----YGLH--KAAL  
Q-RLTCAQNNPZQGGPTVPPG---IQEKGAMPENLL----MDFS--ELPQ  
Q-CLTCTQSNSTRAYLAPGE---FRKQWPCPVITCF----WTSF--NCPE  
G-VZLVLTITSTRAHLTPQE---FRKQEPSLCKRAY----GLHQ--TVLS  
Q-CLTCAQNNPZQGGPTVPPG---NRKQWPHPVK-TY----LQIS--KMPQ  
Q-CLICQNNPZQGGPTVPPA---VQKR-ATPCENLL----VDFT--KLPQ



Chr11\_67999520\_760\_po\_C\_Xz8/8  
Chr3\_75461975\_796\_po\_C\_Xz7/9  
Chr12\_52228939\_692\_po\_C\_Xz3/10  
Chr10\_15211234\_286\_po\_C\_Xz11/1  
Chr12\_100973302\_945\_po\_C\_Xz12/  
Chr19\_9685420\_817\_po\_C\_Xz6/10  
Chr13\_40936820\_719\_po\_C\_Xz9/10  
Chr7\_63858202\_1754\_po\_C\_Rz12/9  
ERV3\_chr7q21\_AC073210\_polputei  
Chr6\_110218096\_843\_po\_C\_Xz16/8  
Chr6\_110214535\_786\_po\_C\_Xz16/8  
ChrY\_3018841\_881\_po\_C\_Rz9/12  
ChrX\_86876098\_639\_po\_C\_Xz7/8  
Chr14\_68899917\_965\_po\_C\_Xz6/8  
ChrY\_23874437\_661\_po\_C\_Xz5/9  
ChrY\_27518418\_649\_po\_C\_Xz15/9  
ChrY\_25016892\_657\_po\_C\_Xz13/12  
ChrY\_19932937\_520\_po\_C\_Xz10/14  
Chr7\_20104614\_518\_po\_C\_Xz10/14  
Chr19\_58660155\_598\_po\_C\_Xz21/1  
Chr19\_58621153\_500\_po\_C\_Xz21/1  
Chr7\_139686987\_710\_po\_C\_Xz11/7  
ChrY\_237651301\_1097\_po\_C\_Pz13/  
Chr11\_29579197\_930\_po\_C\_Pz8/12  
Chr4\_117329205\_488\_po\_C\_Xz3/16  
Chr21\_38522185\_383\_po\_C\_Xz7/9  
Chr4\_70173370\_1049\_po\_C\_Xz11/8  
Chr4\_70022513\_788\_po\_C\_Kz10/12  
Chr14\_105225894\_1027\_po\_C\_Xz13  
Chr7\_119241536\_761\_po\_C\_Xz11/1  
ChrY\_22564970\_567\_po\_C\_Xz9/10  
Chr21\_14409346\_1477\_po\_C\_Pz5/6  
ChrX\_51259700\_1396\_po\_C\_Pz7/8  
Chr6\_64985396\_1041\_po\_C\_Xz11/1  
ChrY\_20355209\_659\_po\_C\_Xz7/11  
Chr3\_34567166\_523\_po\_C\_Xz8/6  
Chr3\_122072468\_245\_po\_C\_Xz9/9  
Chr11\_58788475\_541\_po\_C\_Xz8/22  
Chr6\_137421042\_373\_po\_C\_Xz6/9  
Chr4\_115910608\_550\_po\_C\_Pz8/12  
ChrY\_13743185\_977\_po\_C\_Xz14/8  
HERV15  
ChrX\_117198092\_983\_po\_C\_Xz8/8  
Chr19\_21166030\_1412\_po\_C\_Xz9/1  
Chr19\_21213743\_913\_po\_C\_Xz14/1  
Chr19\_15957774\_569\_po\_C\_Xz8/10  
Chr11\_77508681\_297\_po\_C\_Xz19/1  
Chr13\_98250769\_738\_po\_C\_Xz7/13  
Chr6\_39968183\_513\_po\_C\_Pz10/9  
Chr15\_66867263\_645\_po\_C\_Xz11/1  
HERV18\_polputein  
HERVIP10FH\_polputein  
MER66\_polputein

CG---GNKYLLVLGRYTSYSGWVEAYPT-TEKAREVTRVL-----  
CG---GNKYLLVLGRYTSYSGWVEAYPTZTEKASEVTPVL-----  
CG---GKQYLLVLGCTCSYSGWVEAYPTRTKKAREVTRVF-----  
CG---GNKYLLVLGRYTSYSGWVEAYPTRTKPREETRVL-----  
CG---DNKYLLVLVCTYSYSGVEAYPTRTEKAYEVTCVL-----  
CG---GNNYLLVLVCTYSYSGWVEAYPTSTEKVEVVPVCF-----  
II---SRDVLVLKLVZVPARWIAGKPGGGGNKAE-NPGP-----  
AG---SYRYMLVLVYTFSGWAKAFPTRSKNSZEVTKI-----L  
AG---SYRYMLVLVYTFSGWAKAFPTRSKNSZEVTKI-----L  
GE---GCQYMLVFICTFLGWVEAFPTQTEKAREVTKI-----L  
GE---GCQYMLVFICTFLGWVEAFPTQTEKAREVTKI-----L  
VG---DYQYLLVLIIFTFSGWVKALPTRTEKARQVTKV-----L  
VG---DYQYLLVLIIFTFSGWVKALPTRTEKAREVTKV-----L  
AG---DYRYMLVLICTFSGWIEAFPTRIEKTZEVTKV-----L  
SV---GCKYILVIFCTFSGZVEAFPTLTKSZEVTEV-----L  
SV---GCKYILVIFCTFSGZVEAFPTLTKSZEVTEV-----L  
SV---GCKYILVIFCTFSGZVEAFPTLTKSZEVTEV-----L  
SG---DYQYLLGLVCTFLGWVEAFHTPTEKSGEVTEV-----R  
SG---DYQYLLGLVCTFLGWVEAFHTPTEKSGEVTEV-----R  
ASDR-GCRYMLVLICTFFKIGZSFPHQDRKS-MRSDZ-----  
A--R-GYGYMLLLICTFSRZVAFSTRGKVVQ-EVTKVL-----  
AG---GYRYMLVLICTFPGWVEAFPTRTKKAREVTKARZ-----K  
ARG---YRYMLVLVCTFSGWVEAFPTSTRTEKAZEVTKVL-----  
AGG---YWYMLVLIIFTISGCVAFPTRTTEKAREVTKVL-----  
CEN---LLMNFVKLLRAGG---YQYMLVLSAWEVTKVL-----  
SRG---LLYMLVLFCTLSGZVAFPTQTEKAREVTKVM-----  
AGV---YRYMLVLVCTFSGWVMAFVSRTEKAZELMKVL-----  
GG---YQYMLVLVCTFSGWVKVFPPTZTZKAQEVTKG-----  
RG---YQYMLVLVCTFSGWVEAFSTQTKKAZEATKVL-----  
MRG---YQYMLVLVCTFSGWVEAFPTRTERAZEVTKVL-----  
AG---GHWYLLVLVCTFSLWVEAFVFNTEKAWEVTRVQ-----  
AG---GCQYILVFTFSG--WIKAFPTRTTEKAZEITRIL-----  
AG---DYQYMLVLVCTFZRWVEAFPTRTTEKAREVTRIL-----  
AR---GYWYMLVFAFTFSGWVEAFPTRTTEKAREVTKIL-----  
AR---GYRYMLVFCVCFSGWVEAFPTLRTGKTEVTKIL-----  
AR---GYRYMLVFCVCFSGWVEAFPTRTTEKAREVTRIL-----  
AR---GYWYMLVFCVCFSGWVKAFPTRTEKAREVTRIL-----  
AR---GYRYMLVFCVCF-----  
TG---GYRCMLVFCVCFSGWVEAFPTRTTKKAREVTRIL-----  
VG---GYRYR-RFVCTFSGWVEAFPTVTEKAREVTRIL-----  
AG---GYWYMLVFCVCFGLGVEAFPTRTNEKAREVTKVI-----  
AG---GYRYMLVFCVCFSGWVEAFPTRTTEKAREVTKVL-----  
AG---GYRYMLVFCVCFSGWVEAFPTRTTEKAREVTKVL-----  
AG---GYRYMLVFCVCFSGZVEAFPIRTEKAREVTKVL-----  
AE---CYWYMLVSVCTFSRWEAFVFNTEKAZEVTKLL-----  
LGQAGRLPGREVLVAGAGFLTMSCECFKVGDEAMQWATLEFK-----T  
ARRGGTLLZSQQLLGG--LRQGNCLNLGGGCGSEPRCLCHY-----  
WEPHVSITLTDQRGHHWLSNPKMTQYQGFGLCDNTYIILV-----N  
YVINFI IWLQAVLEVITSETSRALNLLAMQATQMRNALY-----E  
TSLLPMLGVRMLLFALLMVPISMLEGGPIEGCPHCHM-----T  
SQ---GYTHALTAVDMATSVFAYPCRVAQDQHTIQAL-----  
-----CVNIIAKVKGVSSSFSSELDIKIKAQQVFLKALTCS-----  
-----RRASVCAPTGLIFVCGHEWEVETX-----

HERVI\_polputein  
HERVIP10F\_polputein  
HERVadp\_AC005741  
HERV-PT47D  
ERV\_W\_chr6\_141432567\_ERV9\_lik  
ERV9\_PH1\_RT  
Chr13\_54564403\_572\_po\_C\_Yz7/14  
ERV\_Y\_chr12\_51022911\_pol  
HERV17\_polputein  
ERV\_W\_chr7\_9105739\_syncytin\_p  
ERV9\_polputein  
HUERS-P3\_polputein  
ERVfrd\_AC004022  
PRIMA41\_polputein  
ERV\_H\_RGH1\_pol  
ERVHRGH2\_pol  
ERV\_H48I\_polputein  
ERV\_H\_RTVLH2\_pol  
ERVVFH21\_pol  
HERVRblike\_chr4\_109047953  
ChrY\_13790029\_693\_po\_C\_Xz12/11  
HERVS71\_polputein

-ENIVPRFGLIQSTSDSNGTHFTAYVIKKLAQVLDIKWKNHIPWHL---S  
-ENIVPRFGLIENIDSDNGTHFTTHI I KKLSQTLDIRWEHHTPWHP---P  
-EZIVPRFGLAENIDSDNGSHFTSRVLRGIMEGLQIRWDYRTPWHP---P  
-KTILPRN---ITDDSNKRKGI I WILDRILQIAKISFFQINNIFF---A  
-----HEKILIITGHQRNANQNHK-----EI  
LAFGPRIFNLLVKFVWSRIEAIKLMVLIQIEPQMSSTNNFYRGPL---DZ  
IHFNPICIFNLLVKFDSRIKTVKLQIVLQMEPQMOSMTKIHCGLP---DR  
VHEI I PRFGLPZGLRSDNGPAFKAAPTQVVSQALGIRYHLHCAWR---PQ  
VHEI I PRFGLPRGLQSDNGPAFKAAPTQGVVSQALGIQYHLHCAWR---PQ  
VHEI I PRFGLPRGLQSDNSPAFQATVTVQGVVSQALGIRYHLHCAZR---PQ  
IDEI I PRFGLPZGLQSDNGP-FKATITQGMSSRLGIQYHLHCARR---PQ  
VNEITPRFGLPKYLQSDNGPSFKAAPTQGVSKALGYS-ISPLAWR---PQ  
LKECISWFLERLPSIQSDNGPSFISZITQGVVSRAVSKHKHTLTPG---DQ  
LKEI I PRFGLPKSLQSDNGPSFTATITQNISSALGIQYRLHSAWR---PQ  
LSDI I PRFGLPSTIQSDNGPAFTSQITQAVSQALGIQWKLHPIPH---PQ  
LSDI I PWFLPFSIQSDNGPAFTSK-SQAVSQALGIQWNLHPIPH---PQ  
IMHI I PRFGLPSTIQSDNGPAFISQITQGVVSTSLXIKWVLTPTYP---PQ  
LSDI I PRFGLPSTIQSHSRPAFISQAVSQALSIQZNLPIYPS---PQ  
VTEI I PRFGLPSTIQSDNGPSFISQITQGVVSQALGIQWKLHIPCW---PQ  
LKEI I PRYGFDDI IQSDNGPSFTZIEIAQQVRKVLGIKWLHTAWR---PQ  
LDEI I LZHRLPAAIRSDNRPAFTLSIPQSVSKNS-----EL  
LIKI I SQHGLPVAIGSDNGPAFTSSMAQSVSKALNIKWLHCTYZ---PQ

BaEV\_M7\_pol  
HERVR\_polputein  
AKR\_MLV\_MLOCG\_RT  
GaLV\_pol  
Chr3\_158587414\_1662\_po\_C\_Ez10/  
Chr3\_79627623\_1138\_po\_C\_Ez4/7  
Chr19\_20477244\_1350\_po\_C\_Ez10/  
Chr5\_111890459\_1626\_po\_C\_Ez10/  
ChrX\_48766518\_1600\_po\_C\_Ez6/3  
ChrX\_152580713\_1572\_po\_C\_Ez10/  
ChrX\_139287533\_1154\_po\_C\_Xz8/4  
Chr2\_52615786\_912\_po\_C\_Xz11/5  
HERV-E\_4\_1  
ChrY\_21962399\_1137\_po\_C\_Xz13/9  
ChrY\_8634032\_950\_po\_C\_Xz14/10  
Chr3\_126735360\_997\_po\_C\_Xz5/10  
Chr3\_126713203\_958\_po\_C\_Xz7/8  
Chr3\_75226118\_977\_po\_C\_Xz8/9  
Chr7\_6629919\_827\_po\_C\_Xz8/7  
Chr4\_9166812\_811\_po\_C\_Xz8/10  
Chr12\_8478642\_834\_po\_C\_Xz12/7  
Chr10\_15187175\_787\_po\_C\_Xz11/5  
Chr11\_71819740\_854\_po\_C\_Xz11/9  
Chr11\_71519974\_886\_po\_C\_Xz13/9  
Chr8\_7271441\_969\_po\_C\_Xz10/6  
Chr8\_11770066\_826\_po\_C\_Xz9/8  
Chr4\_4128362\_651\_po\_C\_Xz7/11  
Chr14\_50203955\_850\_po\_C\_Xz10/8  
Chr14\_50205291\_837\_po\_C\_Xz10/8  
Chr7\_6597120\_842\_po\_C\_Xz7/7  
Chr11\_71544658\_783\_po\_C\_Xz8/13  
Chr11\_67999520\_760\_po\_C\_Xz8/8  
Chr3\_75461975\_796\_po\_C\_Xz7/9  
Chr12\_52228939\_692\_po\_C\_Xz3/10  
Chr10\_15211234\_286\_po\_C\_Xz11/1  
Chr12\_100973302\_945\_po\_C\_Xz12/  
Chr19\_9685420\_817\_po\_C\_Xz6/10  
Chr13\_40936820\_719\_po\_C\_Xz9/10  
Chr7\_63858202\_1754\_po\_C\_Rz12/9  
ERV3\_chr7q21\_AC073210\_polputei  
Chr6\_110218096\_843\_po\_C\_Xz16/8  
Chr6\_110214535\_786\_po\_C\_Xz16/8  
ChrY\_3018841\_881\_po\_C\_Rz9/12  
ChrX\_86876098\_639\_po\_C\_Xz7/8  
Chr14\_68899917\_965\_po\_C\_Xz6/8  
ChrY\_23874437\_661\_po\_C\_Xz15/9  
ChrY\_27518418\_649\_po\_C\_Xz15/9  
ChrY\_25016892\_657\_po\_C\_Xz13/12  
ChrY\_19932937\_520\_po\_C\_Xz10/14  
ChrY\_20104614\_518\_po\_C\_Xz10/14  
Chr19\_58660155\_598\_po\_C\_Xz21/1  
Chr19\_58621153\_500\_po\_C\_Xz21/1  
Chr7\_139686987\_710\_po\_C\_Xz11/7  
Chr7\_137651301\_1097\_po\_C\_Pz13/  
Chr11\_29579197\_930\_po\_C\_Pz8/12  
Chr4\_117329205\_488\_po\_C\_Xz3/16  
Chr21\_38522185\_383\_po\_C\_Xz7/9  
Chr4\_70173370\_1049\_po\_C\_Xz11/8  
Chr4\_70022513\_788\_po\_C\_Kz10/12  
Chr14\_105225894\_1027\_po\_C\_Xz13  
Chr7\_119241536\_761\_po\_C\_Xz11/1  
ChrY\_22564970\_567\_po\_C\_Xz9/10  
Chr21\_14409346\_1477\_po\_C\_Pz5/6  
ChrX\_51259700\_1396\_po\_C\_Pz7/8  
Chr6\_64985396\_1041\_po\_C\_Xz11/1  
ChrY\_20355209\_659\_po\_C\_Xz7/11  
Chr3\_34567166\_523\_po\_C\_Xz8/6  
Chr3\_122072468\_245\_po\_C\_Xz9/9  
Chr11\_58788475\_541\_po\_C\_Xz8/22  
Chr6\_137421042\_373\_po\_C\_Xz6/9  
Chr4\_115910608\_550\_po\_C\_Pz8/12  
ChrY\_13743185\_977\_po\_C\_Xz14/8  
HERV15  
ChrX\_117198092\_983\_po\_C\_Xz8/8  
Chr19\_21166030\_1412\_po\_C\_Xz9/1  
Chr19\_21213743\_913\_po\_C\_Xz14/1  
Chr19\_15957774\_569\_po\_C\_Xz8/10

LEEIFPRFGLPKVIGSDNGPAFVSVQVSLARILGINWKLHCAYR---PQ  
LEEIFPRFGLPKVIGSDNGPAFVSVQVSLARILGINWKLHCAYR---PQ  
LEEIFPRFGLMPQVLTGSDNGPAFVSKVSTVADLLGIDWKLHCAYR---PQ  
LEEILPRFGIPKVLGSDNGPAFVAQVSLATQLGINWKLHCAYR---PQ  
LZDLIPRFGLPLZISSDNRPFAFVAVLVQKTAKALGITWKLHCATYR---PQ  
LRDLIPRFGLPLZIVSDNGPAFVADLVQKTAKALGITWKLHCATYR---PQ  
LZDLIPRFGLPLZIGSDNGPAFVADLVQKTAKALGITWKLHCATYR---PQ  
LZDFIPRFGLPLZIGSDNGPAFVADLVQKTAKALGITWKLHCATYZ---PQ  
LZDLIPRFGLPLZIGSDNGPAFVADLVQKTAKALEITWKLHCATYR---PQ  
LZDLIPRFGLPLZIGSDNGPAFVADLVQKTAKALGITWKLHCATYZ---PQ  
LRDLIPRFGLPLZIGSDNGPAFVADLVQRTAKVLRITWKLHCATYR---PQ  
LRDLIPRFGLPLZIGSDNRPAFVADLVQKTAKVLGITWKLHCATYZ---PQ  
L-EILPRFGLPLRIGSDNGLVFAVADLVQKTAKVLGITWKLHCATYR---PQ  
PRDLITRFGLPLZISSDNRPVFAVADLVZKTAKPLGITWKLHCATYR---PQ  
LZDLIPRFGLPLZISSNWLAFVADLVQKTAKALGITWKLHCATYZ---PQ  
LZDVIPRFPRPLRIGSDNGPAFLAALVQKTAKILGITRKLHCATYR---PQ  
LRDLIPRFPRPLWIGSDNGPAFLAALVQKTAKVLGITRKLHCATYR---PQ  
LRDLIPRFRRP-RIGSDNGPAFLAALVQKTAKVLGITRKLHCATYR---PQ  
LRDLIPRFGLPLRIGSDNGPAFLAALVQKTAKVLGITRKLHCATYR---PQ  
LZDLIPRFPRPLRIGSDKGPFAFLAALVQKTAKVLGITRKLHCATYR---PQ  
LRDLIPRFPRPLRIGSDNRPAFVADLVQKTAKVLGITRKLHCATYR---PQ  
LRDLIPRFPRPLRIGSDNGPAFLAALVQKTAKVLGITRKLHCATYR---PQ  
LRDLIPRFPRPLRIGSDNGPAFLAALVQKTAKVLGITRKLHCATYR---PQ  
LZDLIPRFPRPLWIGSDYGPFAFLAALVQKTAKVLGITRKLHCATYR---PQ  
LRDLIPRFPRPLWIGSDNGPAFLAALVQKTAKVLGITRKLHCATYR---PQ  
LHDWIPRFRRALRIGSDNGPAFLAALVQKTAKVLGITRKLHCATYR---PQ  
-----IELMEQPHLKVS---RWLHRDVK-----VW  
LRDLIPRLELPRFRIGSDNGPAFVADLLQKTATVGLGITRKLHCATYR---PQ  
LRDLIPRLELPRFRIGSDNGPAFVADLLQKTATVGLGITRKLHCATYR---PQ  
LRDLIRRLGQPFRIGSDNGPAFVADLLQKTAKVLGITRKLHCATYR---PQ  
LRDLIRRLGQVFRIGSDNGPAFVADLLQKTAKVLGITRKLHCATYR---SQ  
LRDLIRRLGQVFRIGSDNGPAFVADLLQKTAKELGITRKLHCATYR---PQ  
LZGMI PRFZLPLRIGSDNGPAFLAALVQKTAKVLGITRKLHCATYR---PQ  
LRDLIPRFGLPLRIGSDNGPAFVADLVQKTAKVSGITWKRHCATYR---PQ  
LRGLIPRGLPLFRIGSDNGPAFVADLLQKTAKVLGITRKLHCATYR---PQ  
LZDLIPRFRLPLZISSDNRPFAFVADLVQKTAKASGITWKLHCATYR---PQ  
SEILFLGLDCPY-----ESQNMARLWLTWY---RL  
GSNTASHLQLSFCLFPLPLRLLHSFSLSLHPSFSSTCRWHPVLM---PZ  
LRNIIPRFGLSVTLGSDNRFAFLAEIIQELTRVLKIKWKLHCATYR---LQ  
LRNIIPRFGLSVTLGSDNRFAFLAEIIQELTRVLKIKWKLHCATYR---LQ  
LRDIIPRFGLLTLSDNRPAFVAEISGTNMAVSSS-----Q  
LRDIIPRFGLLTLSDNRPAFVAEISGTNMAVSSS-----Q  
LTDIILRFGLPLTLGSDNGLRFVAKISGTNA-LLKIKWKLHCATYR---RR  
LRDIILRFGLPLTLGSDNGLRFVAKISGTNA-LLKIKWKLHCATYR---SQ  
LR-HYPRFGLPLTLGSDNGPAFLATIVQKLTQLLKVRZKLHCATYR---PQ  
LRDDI PRLRMPLTLGSENGKLVFVTEVQGL-----PQ  
LRDDI PRLRMPLTLGSENGKLVFVTEVQGL-----PQ  
LRDDI PRLRMPLTLGSENGKLVFVTEVQGL-----PQ  
LRDIIPRFRLPLTLRSENGLEFVAKISGTNA-LP---VT  
LRDIIPRFRLPLTLRSENGLEFVAKISGTNA-LP---VT  
--RLLPRFGLPLSLKSDNGPAFAAEIVQDLTRLLKIKWKLHCATYR---PE  
IKDIIPRFGLPLTLGSDNGPAFVAEIVZDFTSLKIKWKLHCATYR---SQ  
TLSDIIPRFGLPLTLGSDNGPAFVAEIVQDLTRLLKIKWKLHCATYR---PQ  
LRDIIPRFGLPLTLGSDNGPAFVAEIVQDLTRLLKIKWKLHCATYR---PQ  
LRDIIPRFGLPLTLGSDNGPAFVAEIVQDLTRLLKIKWKLHCATYR---PQ  
LRDIIPRFGLPLTLGSDNGPAFVAEIVQDLTRLLKIKWKLHCATYR---PQ  
LRDIIPRFGLPLTLGSDNGPAFVAEIVQDLTRLLKIKWKLHCATYR---SV  
--GIIPRFGLLLNLGSDNGLAFVAEIVQDLTRLLKIKWKLHCATYR---PQ  
LRDIIPRFGLPLTLGSDNGLAFVAEIVQDLTRLLKIKWKLHCATYR---LQ  
LRYIIPRFGLPLTLGSDNGLAFVAEIVQDLTRLLKIKWKLHCATYR---LQ  
LKDCIPRFGLPLTLGSDNGPAFVAEIVQDLTRLLKIKWKLHCATYR---LQ  
LKDIILFRMPLPLGSDNRPAFVAEIVQDLTRLLKIKWKLHCATYR---PQ  
LKDIIPRFRLPLTLGSDNRPAFVAEIVQDLTRLLKIKWKLHCATYR---PQ  
LKDIIPRFRLPLTLGSDNRPAFVAEIVQDLTRLLKIKWKLHCATYR---PQ  
LKDIIPRFRLPLTLGSDNRPAFVAEIVQDLTRLLKIKWKLHCATYR---PQ  
-----SDNGSAFVAEIVQDLTRLLKIKWKLHCATYR---PQ  
LKDIIPRFRLPLTLGSDNGPAFVAEIVQDLTRLLKIKWKLHCATYR---PI  
LKDIIPRFGLPLTLGSDNGPAFMAKIVQDLTRLLKIKWKLHCATYR---PQ  
LKDIIPRFRLPLTLGSDNGLAFVAEIVQDLTRLLKIKWKLHCATYR---PQ  
LKDIIPRFGLPLTLGSDNGPAFVAEIVQDLTRLLKIKWKLHCATYR---PQ  
LKDIIPRFGLPLTLGSDNGPAFVAEIVQDLTRLLKIKWKLHCATYR---PQ  
LKDIIPRFGLPLTLGSDNGPAFVAEIVQDLTRLLKIKWKLHCATYR---PQ  
LR-HIARFGLPLTLGSDNGPAFVAEIVQDLTRLLKIKWKLHCATYR---SE  
SCQAWHHLACPAQONNEED---MQLVEDWTAIFMTFT-----

Chr11\_77508681\_297\_po\_C\_Xz19/1  
Chr13\_98250769\_738\_po\_C\_Xz7/13  
Chr6\_39968183\_513\_po\_C\_Pz10/9  
Chr15\_66867263\_645\_po\_C\_Xz11/1  
HERV18\_polputein  
HERVIP10FH\_polputein  
MER66\_polputein

--PAWQQRKTPQKKKKEKMKVMEIVMFI LPQFFFFFZRNELSSKAKTW  
-----TFNPATLLPVERELPSMTVETVDEVFSSWKDLTDG-----  
NSLALNYLLASGRVCGKFNLCLEIDDNGQAVMEI TAR-----  
TWIGNTVVKTLTYHRSLSGQNNHTQLMALTKYKPLPKRED-----  
-QHLCALYGRPLAIESDRGTHFTGQQVQQAQMDIKWGFHVYFN---SQ  
LTKIKGZKESIKILPYGQTLKLDKYVYKVLKLSLTLITNIKVKFSL  
--RPLPTPQGPVLLGVAFPCI SKTWNRGECTLATLAPPGVTVYN---PI

HERVI\_polputein  
HERVIP10F\_polputein  
HERVadp\_AC005741  
HERV-PT47D  
HERV\_W\_chr6\_141432567\_ERV9\_lik  
ERV9\_PHL\_RT  
Chr13\_54564403\_572\_po\_C\_Yz7/14  
HERV\_Y\_chr12\_51022911\_pol  
HERV17\_polputein  
HERV\_W\_chr7\_9105739\_syncytin\_p  
HERV9\_polputein  
HUERS-P3\_polputein  
ERVfrd\_AC004022  
PRIMA41\_polputein  
HERV\_H\_RGH1\_pol  
HERVHRGH2\_pol  
HERV\_H48I\_polputein  
HERV\_H\_RTVLH2\_pol  
HERVVFH21\_pol  
HERVRblike\_chr4\_109047953  
ChrY\_13790029\_693\_po\_C\_Xz12/11  
HERVS71\_polputein  
BaEV\_M7\_pol  
HERVR\_polputein  
AKR\_MLV\_MLOCG\_RT  
GaLV\_pol  
Chr3\_158587414\_1662\_po\_C\_Ez10/  
Chr3\_79627623\_1138\_po\_C\_Ez4/7  
Chr19\_20477244\_1350\_po\_C\_Ez10/  
Chr5\_111890459\_1626\_po\_C\_Ez10/  
ChrX\_48766518\_1600\_po\_C\_Ez6/3  
ChrX\_152580713\_1572\_po\_C\_Ez10/  
ChrX\_139287533\_1154\_po\_C\_Xz8/4  
Chr2\_52615786\_912\_po\_C\_Xz11/5  
HERV-E\_4\_1  
ChrY\_21962399\_1137\_po\_C\_Xz13/9  
ChrY\_8634032\_950\_po\_C\_Xz14/10  
Chr3\_126735360\_997\_po\_C\_Xz5/10  
Chr3\_126713203\_958\_po\_C\_Xz7/8  
Chr3\_75226118\_977\_po\_C\_Xz8/9  
Chr7\_6629919\_827\_po\_C\_Xz8/7  
Chr4\_9166812\_811\_po\_C\_Xz8/10  
Chr12\_8478642\_834\_po\_C\_Xz12/7  
Chr10\_15187175\_787\_po\_C\_Xz11/5  
Chr11\_71819740\_854\_po\_C\_Xz11/9  
Chr11\_71519974\_886\_po\_C\_Xz13/9  
Chr8\_7271441\_969\_po\_C\_Xz10/6  
Chr8\_11770066\_826\_po\_C\_Xz9/8  
Chr4\_4128362\_651\_po\_C\_Xz7/11  
Chr14\_50203955\_850\_po\_C\_Xz10/8  
Chr14\_50205291\_837\_po\_C\_Xz10/8  
Chr7\_6597120\_842\_po\_C\_Xz7/7  
Chr11\_71544658\_783\_po\_C\_Xz8/13  
Chr11\_67999520\_760\_po\_C\_Xz8/8  
Chr3\_75461975\_796\_po\_C\_Xz7/9  
Chr12\_52228939\_692\_po\_C\_Xz3/10  
Chr10\_15211234\_286\_po\_C\_Xz11/1  
Chr12\_100973302\_945\_po\_C\_Xz12/10  
Chr19\_9685420\_817\_po\_C\_Xz6/10  
Chr13\_40936820\_719\_po\_C\_Xz9/10  
Chr7\_63858202\_1754\_po\_C\_Rz12/9  
ERV3\_chr7q21\_AC073210\_polputei  
Chr6\_110218096\_843\_po\_C\_Xz16/8  
Chr6\_110214535\_786\_po\_C\_Xz16/8  
ChrY\_3018841\_881\_po\_C\_Rz9/12  
ChrX\_86876098\_639\_po\_C\_Xz7/8  
Chr14\_68899917\_965\_po\_C\_Xz6/8  
ChrY\_23874437\_661\_po\_C\_Xz15/9

SSRRVERMNQTLKSHLTKLVLET-ZLPWTKCLPIALLRIRTAPQRDTGLS  
SSGRVERMNQT-KEPLTKLVLET-RLPWTKCLPIALLRIRTAPRKDIGLS  
SSGKVERMNQTFKKHITKLIET-KMPCTTCLQIALLSIRTAPRKD-GIA  
IPN-----EIAKRFFLEI-RQNYFKIZ-----VEKQMHKD----  
PSHTS-----  
PAGTSPGLESS---PLKDTTTAKPLLR-----  
PASPCSDVNSDKAPLLRKSQHLNPPYAP IQQETEQLANFPNSTWVFLLR  
SSGKVKKMDETLKZYLKLTQETHLAWPALLP IALLRIQNS-----PQK  
SSGKVEKMNETLKRHLKLTQETHLAWPALLP IALLRIRNS-----PQK  
SSGKVERMNQTLKSHLTKLVLET-RLPWTKCLPIALLRIRTAPRKDIGLS  
SSGKVKKANETLE-ALRKLQGTGTS-PWPTLLPMALLRIRNS-----PHK  
SSGKVEKTNDI IK-TLRKLSQETHLPWVTLPMALLQVRNX-----PSK  
PSGKVERTKETLEHILNKLCQKTAQPWVDDLLAPLWIHIAP-----QTP  
SSGKVERMNQTLKSHLTKLVLET-RLPWTKCLPIALLRIRTAPRKDIGLS  
SSGKVERTNGLLKPHTKLSLQKLDWTVLLPLALLRIRACP-----RDA  
SSGKVKPTNGLLTKHLTKLSLQKLDWTVLLPLALLRIRTCP-----RDA  
SSGKVEKINSVLAQTLKLALETHQSWTKNLPFALMRLRATP-----KAP  
SSGKVEQTNLSLTKHLTSSATNLKRTQYFYHFFPSEFRPVL-----RML  
TSGKVERANGILKAQTLKLTLEVQKWPWSLLPIALESIRASP-----KAP  
SSRQTERINHTLTKTLAKLCQETRLKWLQLLGIPLLVQRIAP-----RSG  
CTGRMHKPHP--KNTFTKILKLTG-EDZVRL-LVLLKVRZTSYQAR-FS  
SSGQVERMNHTIKSTLTKLILETS-ENWVKLLPLALLRVRTTYWAG-FS  
SSGQVERMNRTIKETLTKLTLETGLKDWRRLLSLALLRARNTPNRFG-LT  
SSGQVERMNRTIKETLTKLTLETGLKDWRRLLSLALLRARNTPNRFG-LT  
SSGQVERMNRTIKETLTKLTLETGLKDWRRLLSLALLRARNTPNRFG-LT  
SSGQVERMNRTIKETLTKLALETGGKDWVTLPLALLRARNTPGPHG-LT  
SSGKVERMNRTIKNSLQKVCQET-GLEWIQALPMVLFKIRCTPSKKGYS  
RSRKVEQMNQTIKNSLQKVCQET-GIKWY-ALPMVWFKIRCNPRK-GCS  
SSGKVEPMIRTIKNSLQKVCQEA-GLKWIQALPMVLFKIRCTPSKKTGYS  
SSGKDVMMNRTIKNSLQKVCQEI-GLKQIQSLPMILFKIRCTPSKKTGHS  
SSGKVERMNRTIKNSLQKVCQET-GLKWIQALPMVLFKIRCTPSKKTGYS  
SSGKVERMNRTIKNSLQKVCQET-GLKCIQALPMVLFKIRCTPSKKTGYS  
SSGKVERMNRTIKNSLQKVCQET-GLKWIQALPMVLFKIRCTPSKKTGYS  
SSRKEVQMYRTTKNSLQKVCQEI-GLKVVZTLPMVLFKIRCTPSKRIGYS  
SSGKVERMNRTIKNSLQKVCQET-GLKWIQALPMVLFKIRCTPSKRIGYS  
SSGKVERMNRTIKNSLQKVCQET-RLKVVQALPMVLFKIRCTPSKRIGYS  
SSGKVERMNQTIKNSLQKVCQET-GFKWIQALPMVLFKIRCTPSKKTGZC  
SSGKVERMNRTIKN-----STVFPAGYLKQHHKGRQ  
SSGKVEWMNRTIKN-----STIVFPAGYLKNTTRGVK  
SSGKVERMNQTIK-----STLSSPLDIENNTTRGVK  
HSGKVERMNWTIKN-----STIVFPAGYLKNTARGVK  
RSGKVERMNRTIKN-----STIVFPAGYKQHHKVRQ  
SSGKVERMNRTIKN-----STIVFPAGYLKNTTRGVK  
SSGKVERMNRTFKN-----STIVFPAGYKNTTRGVK  
SSGKVEWMNRTIKN-----STIVFPAGYLKNTTRGIK  
HSGKVERMNRTIKN-----STIVFPAGYKNTTRGVK  
SSGKVERMNRTIKN-----STIVFPAGYLKQHHKGRQ  
SSGKVERMNRTIKN-----SSIVFPAGYLKQHHKGRQ  
R-----  
SSGKVERMNRTIKN-----SIMVFPAGYKNTTRGVK  
SSGKVERMNRTIKN-----SIMVFPAGYKNTTRGVK  
SSRKEVQMYRTTKNSLQKVCQEI-GLKVVZTLPMVLFKIRCTPSKRIGYS  
SSGKVEWMNRTIKN-----NIIVFPAGYKNTTRGVK  
SSGKVEGMNRTIKI-----VLLSSAMDMZNNTRGVK  
SSGKVERMNRTIKN-----STIVFTCGYLKNTTRGIK  
SSGKVERMNRTIKN-----SIIIFPTGYKTIPOGASN  
SSGKVERMNWTIKN-----STIVFPAGYKHHHEGRQ  
SSGKVEZMNQTIKS-----SLGKMLGNRIKVDGSGWS  
AG---CISSTCIP-----SYLRLRHEDLEPGRWRFPQ  
ANRPAANLGAEAMR-----LPSNAALPLARAGVQGSRYP  
SLGKVECMNWTIKLQLLKVCQET-PLRWDQVLPVLLQVRCPTKQGTGYS  
SLGKVECMNWTIKLQLLKVCQET-PLRWDQVLPVLLQVRCPTKQGTGYS  
SSGKVEHMNQTILKQLLKVCZET-HLRWDQVLPVLLZVRCIPTKQGTYL  
SSGKVEHMNQTILKQLLKVCZET-HLRWDQVLPVLLZVRCIPTKQGTYL  
AQEKWRAZTRHS-NATKEILPRN-PSEMGLGPAHGPPPGQVPHNKLGIH  
SSGKVESMNQTO-IATKEILPRN-PSEMGLVLPVLLQVRCPTKQGTGYS  
SSGKVEHMNQTILKQPLKVCQET-HLRWDQVLPVLLRVR-HPYQTTGYS  
-----FSTGHPQSZL

ChrY\_27518418\_649\_po\_C\_Xz15/9  
ChrY\_25016892\_657\_po\_C\_Xz13/12  
ChrY\_19932937\_520\_po\_C\_Xz10/14  
ChrY\_20104614\_518\_po\_C\_Xz10/14  
Chr19\_58660155\_598\_po\_C\_Xz21/1  
Chr19\_58621153\_500\_po\_C\_Xz21/1  
Chr7\_139686987\_710\_po\_C\_Xz11/7  
Chr7\_137651301\_1097\_po\_C\_Pz13/  
Chr11\_29579197\_930\_po\_C\_Pz8/12  
Chr4\_117329205\_488\_po\_C\_Xz3/16  
Chr21\_38522185\_383\_po\_C\_Xz7/9  
Chr4\_70173370\_1049\_po\_C\_Xz11/8  
Chr4\_70022513\_788\_po\_C\_Kz10/12  
Chr14\_105225894\_1027\_po\_C\_Xz13  
Chr7\_119241536\_761\_po\_C\_Xz11/1  
ChrY\_22564970\_567\_po\_C\_Xz9/10  
Chr21\_14409346\_1477\_po\_C\_Pz5/6  
ChrX\_51259700\_1396\_po\_C\_Pz7/8  
Chr6\_64985396\_1041\_po\_C\_Xz11/1  
ChrY\_20355209\_659\_po\_C\_Xz7/11  
Chr3\_34567166\_523\_po\_C\_Xz8/6  
Chr3\_122072468\_245\_po\_C\_Xz9/9  
Chr11\_58788475\_541\_po\_C\_Xz8/22  
Chr6\_137421042\_373\_po\_C\_Xz6/9  
Chr4\_115910608\_550\_po\_C\_Pz8/12  
ChrY\_13743185\_977\_po\_C\_Xz14/8  
HERV15  
ChrX\_117198092\_983\_po\_C\_Xz8/8  
Chr19\_21166030\_1412\_po\_C\_Xz9/1  
Chr19\_21213743\_913\_po\_C\_Xz14/1  
Chr19\_15957774\_569\_po\_C\_Xz8/10  
Chr11\_77508681\_297\_po\_C\_Xz19/1  
Chr13\_98250769\_738\_po\_C\_Xz7/13  
Chr6\_39968183\_513\_po\_C\_Pz10/9  
Chr15\_66867263\_645\_po\_C\_Xz11/1  
HERV18\_polputein  
HERVIP10FH\_polputein  
MER66\_polputein

HERVI\_polputein  
HERVIP10F\_polputein  
HERVadp\_AC005741  
HERV-PT47D  
HERV\_W\_chr6\_141432567\_ERV9\_lik  
ERV9\_PH1\_RT  
Chr13\_54564403\_572\_po\_C\_Yz7/14  
HERV\_Y\_chr12\_51022911\_pol  
HERV17\_polputein  
HERV\_W\_chr7\_9105739\_syncytin\_p  
HERV9\_polputein  
HUIERS-P3\_polputein  
ERVfrd\_AC004022  
PRIMA41\_polputein  
HERV\_H\_RGH1\_pol  
HERVHRGH2\_pol  
HERV\_H48I\_polputein  
HERV\_H\_RTVLH2\_pol  
HERVVFH21\_pol  
HERVRblike\_chr4\_109047953  
ChrY\_13790029\_693\_po\_C\_Xz12/11  
HERVS71\_polputein  
BaEV\_M7\_pol  
HERVR\_polputein  
AKR\_MLV\_MLOCG\_RT  
GaLV\_pol  
Chr3\_158587414\_1662\_po\_C\_Ez10/  
Chr3\_79627623\_1138\_po\_C\_Ez4/7  
Chr19\_20477244\_1350\_po\_C\_Ez10/  
Chr5\_111890459\_1626\_po\_C\_Ez10/  
ChrX\_48766518\_1600\_po\_C\_Ez6/3  
ChrX\_152580713\_1572\_po\_C\_Ez10/  
ChrX\_139287533\_1154\_po\_C\_Xz8/4  
Chr2\_52615786\_912\_po\_C\_Xz11/5  
HERV-E\_4\_1  
ChrY\_21962399\_1137\_po\_C\_Xz13/9  
ChrY\_8634032\_950\_po\_C\_Xz14/10

-----FSTGHPQSZL  
-----FSTGHPQSZL  
KLRKRSRIHELDTQTASKKYCQET-HLEWNQVLPMLVLLZVRYTPTKQTGYL  
KLRKRSRIHELDTQTASKKYCQET-HLEWNQVLPMLVLLZVRYTPTKQTGYL  
SSRKVKYMNQTLSSYZRNTAKKL-TZ--DKIRSF IWLSSSESGAPPPNKLK  
SSRKVKRMNWTLLKQLLKKKYCQET-HLRZDQVLFMRVLLQVRCPTKQTRYL  
-----VYIYYTLLSSRVHVHNLQV-CY-----ICIHVPCWCAAPIN-----  
SSGKVEHMNWTLLIQLLKKLAKNS-SE-MGSVLPMLVLLZVRCPTKQTGYL  
SSRKVERMNQTLQKLLKKKYCQET-HLRWDQVLPMLVLLRVRCTPQSAL---  
NSSKVERMNRTLKQLLKKKYCQET-HLRWDQVLPMLVLLQVRCPTKQTAYL  
SSKNIECMNWTLLKRLKILSET-HLRWDQVLPMLVLLZVRCPTKQTRYL  
LSKDGAEHPDQTAAAEELSGNSSEVGPGLAHGLSPSQVHPKTNHTGYL  
SSEKMEHMNRTLKAAAEIWSGISSSEVGSGLIHGLPPSQVHPKHKKTGYL  
SSGKVEHMNWTLLKQLLKKKFCET-HLRWDQVLPVLLVQVGCRTKQTGCS  
SSGKVKHMNWTLLKQLLKKKYCQET-HLRWDQVLPMLVLL-MHPQQTNNVVF  
SSGKVEWMPNTQATTEEILSRNSSQVGSFARS---PPLSQVPHYQTNVVF  
SSGKVERMNKTPKQLLKKKYCQET-HLRWDQVLPMLVLLZVRCPTTLNGYS  
SSRKVERMNQTLKQLLKKKYCQET-HLRWDQVLPMLVLLZVRCPTKLTGYS  
GSGRVERMNWTLLKQLLKKKYCQET-HLRZDQVLPVLLHVRCTPMTGYS  
NSGKGERINWTLLKQLLKKKYCQET-HLRWDQVLPMLVLLQVRRTPKLTGYS  
EFSKVERMNQTLKQLLKKKYCQET-HLRWDQVLPMLVLLRIRCTPMTGYS  
SSGKVKRMNQTLKQLLKKKYCQET-HLRWDQVLPMLVLLZARZTPTKVTGYS  
SYGKVERMNWTLLKQLLKKKYCQET-HLKWVQVLPMLVLLZVRCPTKLTGYS  
EFWKVERINRTLKQPLKKFCHET-HLRWDQVLPMLVLLZVRCPTKLTGYS  
SSEKAEMNQTFLKQLLKKKYCQET-HLRWDQVLPMLVLLRVRCTPMTKLT-YS  
RLGKVKQMKQTLKQLLKKKYCQET-HLQWDQVLPMLVLLQVRCPTKQTRYL  
SSGKAXRMNWTLLKQ-LKKVLPET-HLQWDQVLPMLVLLQVRCPTKQTRYL  
SSGKAEWMNQTLKQLLKKMFCQET-HLRWDQVLPMLVLLQVRCPTLQIGYS  
SSEKVERMNQTLKQLLKNFASKL-TYDG-QVLPMLVLLQVRCPTKQTGYL  
R-GMWQGHRIIVERRSADTHEQR-SLVFLGRGPCGLPQCLCPWVLEIR---  
-----SVGR-----FLLPHPVVLPYAH--ALLLQALGISSRRRHP--  
INVECISVSQRKSDGFLLYKDYSTYIHYERZNYRDEKQVGRNSVRRIEZV  
-PLKDPAVEYFTDGSFVLEEVRTCQVHSSNIDSVEAQPLPRTPAQKA  
---MQKLAHVSVQTWKGLSPDSLFRGWSSFDGFKTLIGGFMLILGRLL  
-----LPCHEGLNNSDAFYNSIYRKHQRGEMRQEIQEKZINKKLS  
AAGMIEZYNGLLKNGLLHVTPPSLRGSRRLLDLVLQILNEWPRKGGPAP  
GIKI IQEALSNIKWCLAFFGLKTIKIGAKGNFSVRRHQTIKSTADVPFTK  
RPRNTRSKRARINSGGNRGSNRT-----SSTLGLWCLPRVNPKNLT

PYEMLYGLPY----LYSTANIPTFKIK-----DQFLKNY  
PYEMLYGLPY----LHSTADIPFTFK-----DQFLKNY  
PYKLLYGLPY----LGRATDLPTMETK-----DQFLKNY  
-----NQEN-----FEKTRNLP-----RHILKNI  
-----  
GGTERQDZ-----LDFLQGLRIPKPSGK-----VTASTFKH  
AGLSPYEM-----LYGRP-LTNNLVLDL-----EMANLVAD  
AGLSPYEM-----LYGRPFLTNDLVLDL-----ETANLVAD  
AGLSPYEM-----LYGRPFLTNDLVLP-----KTANLVAD  
MGLSPYEM-----LYGQHFLTNDLLEDL-----EKTNLFKD  
LGXSPFEM-----LYGRXFLTNDLFLDQ-----ETSELVKH  
LQLIPFEA-----LYGKPFLLYSDMLDLE-----KTAKITYC  
LQLSPFEI-----MYGRPFLTDFLIDI-----DTFKLQNY  
TGYSPPFEL-----LYGRTFLLGSPSLIPD-----TSPLGDYL  
QG-TPFEL-----LYGRTFLLGPNLIPD-----TSPLGDYL  
SFYSPFEI-----MYGRTFVLGPPPLPD-----SEPLGNYL  
QG-TAHLA-----SYRYSFLLGSPSLIPD-----TRPI---W  
SFLSPFEL-----IYGRPFLLQ-----NRP-----  
IKZSPCEI-----IFRRPFVANLSQVAR-----MSPDKELA  
PFKIIYK-----RVPPILPKLDTHLAE-----ISQANLLHY  
PFEIMYG-----GSS-ILPKLRDTNLAE-----ISQANLFS-  
PYEILYG-----GPPPLSTLLN-SFSPS-----NSKTDLQAR  
PYEILYG-----GPPPLSTLLN-SFSPS-----NSKTDLQAR  
PYEILYG-----APPPLVNFPPDDMTRV-----TNSPDLQAH  
PYEILYG-----GPPPILESETLGPDD-----RFLPVLPFTH  
PYEILYHR-----PPPILRELPGTPQE-----LGEIELQRQ  
PYEKLYHR-----PPSILWELPGTPRE-----LGEIELQZQ  
PYEILYHR-----PPPILWGLPGIPZE-----LGEIELQZQ  
PZEIPYHR-----PPPILLGLSGTPQV-----SGEIELQRQ  
PYEILYHR-----PPPILRGGFQALPE-----LGEIELQRQ  
PYDILYHR-----PPPILWELPGTPZE-----LGEIELQRQ  
SYEILYRR-----PPPILRGLPGTPQE-----LGEIELQRQ  
PYVILYHIYIYIMPPPIQLQGLPDTPE-----LGEIELQQQ  
PYEILYHR-----PPPILRGLPGTPRE-----LGEIELQRZ  
PYEILYHS-----LLPILWGLPGTPRE-----LGEIELQZQ  
PYEILYHR-----PPPILWELPGTPRE-----LGEIELQRQ



Chr3\_126735360\_997\_po\_C\_Xz5/10  
Chr3\_126713203\_958\_po\_C\_Xz7/8  
Chr3\_75226118\_977\_po\_C\_Xz8/9  
Chr7\_6629919\_827\_po\_C\_Xz8/7  
Chr4\_9166812\_811\_po\_C\_Xz8/10  
Chr12\_8478642\_834\_po\_C\_Xz12/7  
Chr10\_15187175\_787\_po\_C\_Xz11/5  
Chr11\_71819740\_854\_po\_C\_Xz11/9  
Chr11\_71519974\_886\_po\_C\_Xz13/9  
Chr8\_7271441\_969\_po\_C\_Xz10/6  
Chr8\_11770066\_826\_po\_C\_Xz9/8  
Chr4\_4128362\_651\_po\_C\_Xz7/11  
Chr14\_50203955\_850\_po\_C\_Xz10/8  
Chr14\_50205291\_837\_po\_C\_Xz10/8  
Chr7\_6597120\_842\_po\_C\_Xz7/7  
Chr11\_71544658\_783\_po\_C\_Xz8/13  
Chr11\_67999520\_760\_po\_C\_Xz8/8  
Chr3\_75461975\_796\_po\_C\_Xz7/9  
Chr12\_52228939\_692\_po\_C\_Xz3/10  
Chr10\_15211234\_286\_po\_C\_Xz11/1  
Chr12\_100973302\_945\_po\_C\_Xz12/7  
Chr19\_9685420\_817\_po\_C\_Xz6/10  
Chr13\_40936820\_719\_po\_C\_Xz9/10  
Chr7\_63858202\_1754\_po\_C\_Rz12/9  
ERV3\_chr7q21\_AC073210\_polputei  
Chr6\_110218096\_843\_po\_C\_Xz16/8  
Chr6\_110214535\_786\_po\_C\_Xz16/8  
ChrY\_3018841\_881\_po\_C\_Rz9/12  
ChrX\_86876098\_639\_po\_C\_Xz7/8  
Chr14\_68899917\_965\_po\_C\_Xz6/8  
ChrY\_23874437\_661\_po\_C\_Xz15/9  
ChrY\_27518418\_649\_po\_C\_Xz15/9  
ChrY\_25016892\_657\_po\_C\_Xz13/12  
ChrY\_19932937\_520\_po\_C\_Xz10/14  
ChrY\_20104614\_518\_po\_C\_Xz10/14  
Chr19\_58660155\_598\_po\_C\_Xz21/1  
Chr19\_58621153\_500\_po\_C\_Xz21/1  
Chr7\_139686987\_710\_po\_C\_Xz11/7  
Chr7\_137651301\_1097\_po\_C\_Pz13/  
Chr11\_29579197\_930\_po\_C\_Pz8/12  
Chr4\_117329205\_488\_po\_C\_Xz3/16  
Chr21\_38522185\_383\_po\_C\_Xz7/9  
Chr4\_70173370\_1049\_po\_C\_Xz11/8  
Chr4\_70022513\_788\_po\_C\_Kz10/12  
Chr14\_105225894\_1027\_po\_C\_Xz13  
Chr7\_119241536\_761\_po\_C\_Xz11/1  
ChrY\_22564970\_567\_po\_C\_Xz9/10  
Chr21\_14409346\_1477\_po\_C\_Pz5/6  
ChrX\_51259700\_1396\_po\_C\_Pz7/8  
Chr6\_64985396\_1041\_po\_C\_Xz11/1  
ChrY\_20355209\_659\_po\_C\_Xz7/11  
Chr3\_34567166\_523\_po\_C\_Xz8/6  
Chr3\_122072468\_245\_po\_C\_Xz9/9  
Chr11\_58788475\_541\_po\_C\_Xz8/22  
Chr6\_137421042\_373\_po\_C\_Xz6/9  
Chr4\_115910608\_550\_po\_C\_Pz8/12  
ChrY\_13743185\_977\_po\_C\_Xz14/8  
HERV15  
ChrX\_117198092\_983\_po\_C\_Xz8/8  
Chr19\_21166030\_1412\_po\_C\_Xz9/1  
Chr19\_21213743\_913\_po\_C\_Xz14/1  
Chr19\_15957774\_569\_po\_C\_Xz8/10  
Chr11\_77508681\_297\_po\_C\_Xz19/1  
Chr13\_98250769\_738\_po\_C\_Xz7/13  
Chr6\_39968183\_513\_po\_C\_Pz10/9  
Chr15\_66867263\_645\_po\_C\_Xz11/1  
HERV18\_polputein  
HERVIP10FH\_polputein  
MER66\_polputein

HERVI\_polputein  
HERVIP10F\_polputein  
HERVadp\_AC005741  
HERV-PT47D  
HERV\_W\_chr6\_141432567\_ERV9\_lik  
ERV9\_PH1\_RT

TTAKFEG-----MLSSPHLP-RPRI-----LETITQGZC  
PPAKFEG-----MLSSPHLP-QPRI-----LETITQGZC  
PPAKFEG-----MLSSPHLP-RPRI-----LETITQGZC  
PPAKFEG-----MLSSPPLP-RPRI-----LETITKRZC  
TPATFQG-----MLSSPPIP-RPRI-----LETITQGZC  
PPAKFER-----ILSSPSLP-RPRI-----LETITQGZC  
PPAKFEG-----ILSSAPLP-RPRI-----LETITQGZC  
PPAKFEG-----MLSSPLLP-RPRI-----LETITQGZC  
DLLNLR-----CYPLPHSP-GPDI-----RD-NNKGVM  
TTCZIGGN-----VILSPPPP-APDI-----RDNNTVEVMY  
TTCZIGGN-----VILSPPPP-APDI-----RDNNTGVMY  
-----  
PPAKFEG-----MLSSPRLP-LPRI-----LETVTQGZC  
PPAKFEG-----MLSSPRLP-LPRI-----LETVTQGZC  
HLLHLRE-----CYPLPHPP-VPDI-----RGNNTGVMY  
PPATFKG-----MLSSPPLH-PSRI-----LEAKTQGZC  
PPATFEG-----MLSSPPLP-RPRI-----LEAITQGZC  
PPAKLEG-----MLSSPPRPQRPRI-----LETVTQ-VC  
HLPNLR-----YVLP PPP--DI-----RGNNTGVMY  
TPAKFGN-----VILFPAPP-APDI-----RDNNTRVMY  
QDGRIGTA-----PVYSSQHE-RHRR-----QVISAFPTE  
LAQ---IV-----PLHSSLED-GTR-----  
TQLLHDGS-----GSLSAKQSVELIF-----RGAYKT VPS  
PYEILFG-----KPSPIISQIKGNLR-----ELGELTLRRQ  
PYEILFG-----KPSPIISQIKGNLR-----ELGELTLRRQ  
PHEILFG-----QPPSIIGQIKGDVH-----ELGELTLRRQ  
PHEILFG-----QPPSIIGQIKGDVH-----ELGELTLRRQ  
PMRSCSA-----GHPPSZ-----VRLRVT  
PYEILFG-----WPPPIIGQIKGDLR-----ELGELTLRRQ  
PYEILFS-----QPPPIIGQIKGDLR-----ELRDLTLRRQ  
KLGVT-----QTR-----ELTLRRQ  
KLGVT-----QTR-----ELTLRRQ  
KLGVT-----QTR-----ELTLRRQ  
SYGIF-----RPPPIIAQIRGDIC-----ELGKTLRRQ  
SYGIF-----RPPPIIAQIRGDIC-----ELGKTLRRQ  
IHLMEFVQ-----SASPIISQIKSDLQ-----ELEELTLRRQ  
PYZSLFSR-----PALIISQIKGDLQ-----ELEELTLRSKQ  
-----SSFILGIS-----  
PYEILFG-----WPSPIISQIKGDLH-----ELGELTLRRQ  
-YEILFG-----QPPPIIGQINC DL R-----ELGKLSLRRQ  
PYEILFS-----RPPGIRGQLKGD LR-----ELGELTLRRQ  
PYEILFG-----ATP-IIGQVKGDLH-----ELGELTLRRQ  
PNEILFS-----QPPPIISQIKGNLR-----ELQKTLRRQ  
PCEILFG-----WPPPIIRQIKGNLR-----ELQKTLRRQ  
PYEILFG-----RPPPIITGQIKGDLC-----ELR--TLRQ  
YLETLFS-----QPPPIIGQIKGDLC-----ELGKTLRRQ  
FTLGDFVQ-----QTTPSITQVKGDLH-----DLGELNLTRQ  
PYEIVYS-----RPTALISQVKGNLK-----EIGELTLRRQ  
PYEIVYG-----RPPQLIAQIRGDLK-----EIGELTLRRQ  
PCEIVFG-----ZPPSII IQKGDLC-----ZIGELTLRRQ  
PYEIVFG-----QPPPIITQLKGDLC-----EIGKTLRRZ  
LYEIFS-----RPPPIITQIKGDLC-----EIGELTLRRQ  
PYEIVFG-----QAPLMITQIKGD LR-----ESGELTLRRQ  
PYEIVFA-----DPNHNSDKRGFZ-----KIGELTLRRQ  
PYKIVFG-----RHPDHNSDKRGF-----KIGELTLRRQ  
RYEIVFS-----ZPPAINSDKRGLEQD TVSKKKKKRKEIGLTLRRQ  
SYDILLR-----RPSPII-QIRGDLK-----EVGELTLRRQ  
SYEILFG-----RPPPIINQIRGDLK-----ELGELTLRRQ  
PYEILFG-----RPPPIINQIRGZLK-----ELGELTLRRQ  
PYEILFR-----RPPAIINQIRGHLK-----ELGELTLRTQ  
--EVMTL-----NEHA AFKHLFNKVH-----LAPPLIFNPE  
-----SLEPY  
NHRTFZDG-----DIILCNTIMSDMIHDT-----LHLSEPLEPK  
ELIALTRA-----PLLAKDKKVN IY TDSK-----YAF T LHIHG  
ILPCLLP-----LLIRSIQST  
ILGZHPRG-----SSRQSPD  
VEALLHR-----A  
TKDQFLRN-----YILGLSST  
QPESLATN-----TGQALKRI

ILGPYSTFSSSLKTK---GLLAQAPPLEFPAHZRQPGDHVLIKGW----K  
ILGLSSTFSSSLKTK---GLLAQAPPLEFPVHQHPGDHVLKISW----K  
LLAISSTLSSRLK---GLLIQVP-LEFMVT-FQLGDLVLVKTW----K  
IKLZDESIMLPQE---KQIAQVKKKKRVHKGTEINREICYRR----K  
-----

Chr13\_54564403\_572\_po\_C\_Yz7/14  
HERV\_Y\_chr12\_51022911\_pol  
HERV17\_polputein  
HERV\_W\_chr7\_9105739\_syncytin\_p  
HERV9\_polputein  
HUERS-P3\_polputein  
ERVfrd\_AC004022  
PRIMA41\_polputein  
HERV\_H\_RGH1\_pol  
HERVHRGH2\_pol  
HERV\_H48I\_polputein  
HERV\_H\_RTVLH2\_pol  
HERVFH21\_pol  
HERVRblike\_chr4\_109047953  
ChrY\_13790029\_693\_po\_C\_Xz12/11  
HERVS71\_polputein  
BaEV\_M7\_pol  
HERVR\_polputein  
AKR\_MLV\_MLOCG\_RT  
GaLV\_pol  
Chr3\_158587414\_1662\_po\_C\_Ez10/  
Chr3\_79627623\_1138\_po\_C\_Ez4/7  
Chr19\_20477244\_1350\_po\_C\_Ez10/  
Chr5\_111890459\_1626\_po\_C\_Ez10/  
ChrX\_48766518\_1600\_po\_C\_Ez6/3  
ChrX\_152580713\_1572\_po\_C\_Ez10/  
ChrX\_139287533\_1154\_po\_C\_Xz8/4  
Chr2\_52615786\_912\_po\_C\_Xz11/5  
HERV-E\_4\_1  
ChrY\_21962399\_1137\_po\_C\_Xz13/9  
ChrY\_8634032\_950\_po\_C\_Xz14/10  
Chr3\_126735360\_997\_po\_C\_Xz5/10  
Chr3\_126713203\_958\_po\_C\_Xz7/8  
Chr3\_75226118\_977\_po\_C\_Xz8/9  
Chr7\_6629919\_827\_po\_C\_Xz8/7  
Chr4\_9166812\_811\_po\_C\_Xz8/10  
Chr12\_8478642\_834\_po\_C\_Xz12/7  
Chr10\_15187175\_787\_po\_C\_Xz11/5  
Chr11\_71819740\_854\_po\_C\_Xz11/9  
Chr11\_71519974\_886\_po\_C\_Xz13/9  
Chr8\_7271441\_969\_po\_C\_Xz10/6  
Chr8\_11770066\_826\_po\_C\_Xz9/8  
Chr4\_4128362\_651\_po\_C\_Xz7/11  
Chr14\_50203955\_850\_po\_C\_Xz10/8  
Chr14\_50205291\_837\_po\_C\_Xz10/8  
Chr7\_6597120\_842\_po\_C\_Xz7/7  
Chr11\_71544658\_783\_po\_C\_Xz8/13  
Chr11\_67999520\_760\_po\_C\_Xz8/8  
Chr3\_75461975\_796\_po\_C\_Xz7/9  
Chr12\_52228939\_692\_po\_C\_Xz3/10  
Chr10\_15211234\_286\_po\_C\_Xz11/1  
Chr12\_100973302\_945\_po\_C\_Xz12/  
Chr19\_9685420\_817\_po\_C\_Xz6/10  
Chr13\_40936820\_719\_po\_C\_Xz9/10  
Chr7\_63858202\_1754\_po\_C\_Rz12/9  
ERV3\_chr7q21\_AC073210\_polputei  
Chr6\_110218096\_843\_po\_C\_Xz16/8  
Chr6\_110214535\_786\_po\_C\_Xz16/8  
ChrY\_3018841\_881\_po\_C\_Rz9/12  
ChrX\_86876098\_639\_po\_C\_Xz7/8  
Chr14\_6889917\_965\_po\_C\_Xz6/8  
ChrY\_23874437\_661\_po\_C\_Xz15/9  
ChrY\_27518418\_649\_po\_C\_Xz15/9  
ChrY\_25016892\_657\_po\_C\_Xz13/12  
ChrY\_19932937\_520\_po\_C\_Xz10/14  
ChrY\_20104614\_518\_po\_C\_Xz10/14  
Chr19\_58660155\_598\_po\_C\_Xz21/1  
Chr19\_58621153\_500\_po\_C\_Xz21/1  
Chr7\_139686987\_710\_po\_C\_Xz11/7  
Chr7\_137651301\_1097\_po\_C\_Pz13/  
Chr11\_29579197\_930\_po\_C\_Pz8/12  
Chr4\_117329205\_488\_po\_C\_Xz3/16  
Chr21\_38522185\_383\_po\_C\_Xz7/9  
Chr4\_70173370\_1049\_po\_C\_Xz11/8  
Chr4\_70022513\_788\_po\_C\_Kz10/12  
Chr14\_105225894\_1027\_po\_C\_Xz13  
Chr7\_119241536\_761\_po\_C\_Xz11/1

GACNLHTQPIRELTK-----MLTRQKQEVKKZPIIYCLKAQREGQGS  
VTCLAKYQQVLKTLQG-----ACPREEGKELFHPGDMMLAKSLFPNSP  
ITSLAKYQQVLKTLQG-----TCPREEGKELFHPGDMMLAKSLFPNSP  
ITSLAKYQQVLKTLQG-----TYPZEEGKELFHPGDMMLAKSLFPNSP  
ITSSAKYQQNPKNLPE-----GCHREKGTLELFPQGLDLVLKSLPSTSP  
VTSLAHFQQELTQLAE-----AQPQEIIGPPLFNPGLVVLKXTXSLSF  
VSSLAGFQQALQEFWLQR---KPKSEGEKYQPLYPPGSLVLKAWRDGTL  
VINLGGVQNALLEYGNQR---LPSPTKEENLVTTQPGDWVLLKTKWEGSP  
PVLQQARQEIHQASNL-----LLPTPDRQ---PYEDNLAGRSVVVKNLTP  
PVLQQARQESHQAANL-----LLPTPDPQ---PYEDTLAGRSVVLKKNLTP  
PSLIQTRSFIREAANE-----AMPLPVDTSLSQHNCLAGTDVFCQDDP  
TVLQKTCHE-----  
-----  
IKTYATHLEQTLNPLHKFSSNRNVIDSVEAHHPFQSGDQVLQKEWKEAGP  
LQSLQKQVDIIQPLGLRAHPNPVDPDQMGCHSFQPGDLVFKVKS-----R  
TCSLSNRVYETIQPLVQGAHNSNPVDPDQGTGPFHFQPGDLVZVKKF-----Q  
LKGLQAVQAQIWAFLAELYSR-PGHR---TSHPFQVGDVSVYVRRH-----R  
LKGLQAVQAQIWAFLAELYSR-PGHR---TSHPFQVGDVSVYVRRH-----R  
LQALGKITQHEVWRPLAAAYQ-EQLDRPVVPHVYRVGDTVWVRRH-----Q  
LKALEIVRTQIWDQIKIYK-PGTVT--IPHPFQVGDQVVLVRRH-----R  
LQALGKITQTIISTW---VNERCPIISLFSFVHPFSP-GDHVWIKD----WN  
LQALGKITQTIISTW---VNERCPIINLFSFVHPFSP-GDRMWIKD----WK  
LQALGKITQTIISTW---VNERCPIISLFSFVHLPFSP-GDCIWKD----CN  
LQALGKITQTIISTW---VNERYPISLSPVHPFSP-GDRMWIKD----WN  
LQALGKITQTIISTW---VNEKCPISLFSFVHPFSP-GDHVWIKD----WN  
LQALGKITQTIISTW---VNERCPIISLFPFIHTFSP-GGLVWIKD----WN  
LQALGKITQTIISTW---VNERCPRSAYSFVHPFSP-GDCVWIKD----WN  
LQALGKITQKISAW---VNERHPIISLFSFVHPFSP-GDQVWIKD----WN  
LQASGKITQTIISAW---VNERCPVNLFSFVHPFSP-GDLVWIKD----ZN  
LQALGKITHNFSLG---KWE-VPHQLISFVHPFSP-GDQVWIKD----WN  
LQALGKITQTIISTW---VNERCPIISLFCFVHPFSP-GDLWTKD----WN  
TPTALLGVISSAF---LDIRNVTLVCYACR-----EQ-----WN  
TPTALLGVISSLPS---WILG---TISHCACTP-----VAK-----FN  
TPTALLGVISSSFF---LDIRNNTLVCYACR-----EQ-----WN  
MPTALLGVISSSFF---LDIRNNTLVCYACR-----EQ-----WN  
TPTALLGVISS-PF---LDIRNNTLVCYACR-----EQ-----WN  
TTTALLGVISSSFF---LDIRNNTLVCYACR-----EQ-----WN  
TPTALLGVISSSFF---LDIRNNTLVCYACR-----EQ-----WN  
TPTALLGVISSSFF---LDIRNNTLVCYACR-----EQ-----WN  
YTHALLGVISSSFF---LDIRNNTLVCYACR-----EQ-----WN  
THCFIVSNIPPLPSW---IVGTVSHCACRPVAK-----FN-----GM  
THCFIGSNIILSFL---GYZQQYHTVTVRVGVS-----NS-----VE  
-----  
TPTALLGVMSSSFF---LDIRNNTLVCYACR-----EQ-----WN  
TPTALLGVMSSSFF---LDIRNNTLVCYACR-----EQ-----WN  
T-HCFIGINVISAF---LGIRNNTLVCYACH-----EQ-----WN  
TPTPLAVMSSSFF---LDIRNNTVCEVACR-----EQ-----WN  
TPTALLGVMSSSFF---LDIRNNTVCEVACR-----EQ-----WY  
TPTALLGVIHPLPS---WILG-TVSHCACTPV-----AKF-----NG  
PLLYWEKYHPLPSW---ILGTISQCACTPVTK-----Q-----WN  
NHCFIGSNIISLGL---GYZEQYHTVTVRVLSRN-----SME-----CH  
VLGSSHZGVSDSGC---RTVGAVHNVCQSRARHHLIREAQGVRE-----YP  
-----  
LTTAIIYQTNEEAL---YPGEIGWLLSAAPH-----  
MQALGIAMZSVHGW---VQKNAHKPDR-P IHPFKPRDSLWVKKZ-----N  
MQALGIAMZSVHGW---VQKNAHKPDR-P IHPFKPRDSLWVKKZ-----N  
MQALGIGMQGVWLG---TGENTHKPDR-L SMPFKPGDSVWVEKW-----N  
MQALGIGMQGVWLG---TGENTHKPDR-L SMPFKPGDSVWVEKW-----N  
SEN-----  
MQTLGIAMQGVHGW---VWERMPSLDRPVHPFKPGDSVWVWKKW-----N  
MQGLGIAMQDVYGW---VWERMPSLADPAHPFKPGDSVWVWKKL-----N  
RQALKRAMQEVHGW---VWERLSISPNTAHHFRPGDSVZVRN-----K  
RQALKRAMQEVHGW---VWERLSISPNTAHHFRPGDSVZVRN-----K  
RQALKRAMQEVHGW---VWERLSISPNTHTTLDLGLTLCRSEI-----K  
MQALKTAMQVVGZ---VWEKLPISLAKPAYFRPGASVHIRN-----K  
MQALKTAMQVVGZ---VWEKLPISLAKPAYFRPGASVHIRN-----K  
MQALIIAMQEAHNN---MRKNADKS-DRSSTPLKPGDSVZVKKZ-----N  
MQALRTAMQEVHZN---VQERMPISLTDQVHPFQHGDSVZVKKZ-----N  
-----PNA---IPPPFPHQAPVCDIP---LPVSKC-----S  
MQALGISHAKNPWL---GTGKNAHKPNRPIHPFRPGDSVZVKK-----WN  
MKALGIAMQEIHWG---VWERMPSLTDPTHPFKPRDSLWVWKK-----WN  
MQSLRIAMQDVHGW---AWKRMPSLTDPTPLTLATLFRSKKSIQPLWD  
MQALGIAMQCVYGW---VWERMPSLTDLAHPFKPGDAIWWKK-----WN  
MQALDMAMQKVYVZ---AQERMPISLADPVHPFKPEDFVZVKKZ-----T  
MQALGMAMQKVNGZ---TQERMPISLTDPVHPFKPEDSFZVKKZ-----N  
MQALGLAMQKVHGW---VQERMPISLTDPVHPFKPGDLVGVVKKW-----N  
MQALGIVMQEIHGZ---VWERMPSLTEPANPFPKPGD-VVWVQW-----N



Chr11\_71544658\_783\_po\_C\_Xz8/13  
Chr11\_67999520\_760\_po\_C\_Xz8/8  
Chr3\_75461975\_796\_po\_C\_Xz7/9  
Chr12\_52228939\_692\_po\_C\_Xz3/10  
Chr10\_15211234\_286\_po\_C\_Xz11/1  
Chr12\_100973302\_945\_po\_C\_Xz12/  
Chr19\_9685420\_817\_po\_C\_Xz6/10  
Chr13\_40936820\_719\_po\_C\_Xz9/10  
Chr7\_63858202\_1754\_po\_C\_Rz12/9  
ERV3\_chr7q21\_AC073210\_polputei  
Chr6\_110218096\_843\_po\_C\_Xz16/8  
Chr6\_110214535\_786\_po\_C\_Xz16/8  
ChrY\_3018841\_881\_po\_C\_Rz9/12  
ChrX\_86876098\_639\_po\_C\_Xz7/8  
Chr14\_68899917\_965\_po\_C\_Xz6/8  
ChrY\_23874437\_661\_po\_C\_Xz15/9  
ChrY\_27518418\_649\_po\_C\_Xz15/9  
ChrY\_25016892\_657\_po\_C\_Xz13/12  
ChrY\_19932937\_520\_po\_C\_Xz10/14  
ChrY\_20104614\_518\_po\_C\_Xz10/14  
Chr19\_58660155\_598\_po\_C\_Xz21/1  
Chr19\_58621153\_500\_po\_C\_Xz21/1  
Chr7\_139686987\_710\_po\_C\_Xz11/7  
Chr7\_137651301\_1097\_po\_C\_Pz13/  
Chr11\_29579197\_930\_po\_C\_Pz8/12  
Chr4\_117329205\_488\_po\_C\_Xz3/16  
Chr21\_38522185\_383\_po\_C\_Xz7/9  
Chr4\_70173370\_1049\_po\_C\_Xz11/8  
Chr4\_70022513\_788\_po\_C\_Kz10/12  
Chr14\_105225894\_1027\_po\_C\_Xz13  
Chr7\_119241536\_761\_po\_C\_Xz11/1  
ChrY\_22564970\_567\_po\_C\_Xz9/10  
Chr21\_14409346\_1477\_po\_C\_Pz5/6  
ChrX\_51259700\_1396\_po\_C\_Pz7/8  
Chr6\_64985396\_1041\_po\_C\_Xz11/1  
ChrY\_20355209\_659\_po\_C\_Xz7/11  
Chr3\_34567166\_523\_po\_C\_Xz8/6  
Chr3\_122072468\_245\_po\_C\_Xz9/9  
Chr11\_58788475\_511\_po\_C\_Xz8/22  
Chr6\_137421042\_373\_po\_C\_Xz6/9  
Chr4\_115910608\_550\_po\_C\_Pz8/12  
ChrY\_13743185\_977\_po\_C\_Xz14/8  
HERV15  
ChrX\_117198092\_983\_po\_C\_Xz8/8  
Chr19\_21166030\_1412\_po\_C\_Xz9/1  
Chr19\_21213743\_913\_po\_C\_Xz14/1  
Chr19\_15957774\_569\_po\_C\_Xz8/10  
Chr11\_77508681\_297\_po\_C\_Xz19/1  
Chr13\_98250769\_738\_po\_C\_Xz7/13  
Chr6\_39968183\_513\_po\_C\_Pz10/9  
Chr15\_66867263\_645\_po\_C\_Xz11/1  
HERV18\_polputein  
HERVIP10FH\_polputein  
MER66\_polputein

HERVI\_polputein  
HERVIP10F\_polputein  
HERVadp\_AC005741  
HERV-PT47D  
HERV\_W\_chr6\_141432567\_ERV9\_lik  
ERV9\_PH1\_RT  
Chr13\_54564403\_572\_po\_C\_Yz7/14  
HERV\_Y\_chr12\_51022911\_pol  
HERV17\_polputein  
HERV\_W\_chr7\_9105739\_syncytin\_p  
HERV9\_polputein  
HUERS-P3\_polputein  
ERVfrd\_AC004022  
PRIMA41\_polputein  
HERV\_H\_RGH1\_pol  
HERVHRGH2\_pol  
HERV\_H48I\_polputein  
HERV\_H\_RTVLH2\_pol  
HERVVFH21\_pol  
HERVRblike\_chr4\_109047953  
ChrY\_13790029\_693\_po\_C\_Xz12/11

VILCLPGYDEQYHGACKTSEILEZSHP-----LPSRS  
VILCLPGYDEQYHRGCTTSEISGVISSSS-----LWKLGTIS  
MSSCASLYDEQYHGCGTTEILGVISSSA-----LWKLGTIS  
VILCLPGYDEQCHGGCTTSEILGVIPSSP-----LWKLGTIS  
PVLWPWIMN-SKYHGCGTTEILGVTSSSP-----IWNLGTVS  
FLVKERGDRRHLENLVTPTLMLHFFKGLS-----KRHTRR  
-LIIEKZNNNCHQNNVS---VFKWVKSLN-----MLENV-  
-----  
PTTLGPIWDGLHTVILSIPTVVKVAGIVPWIHPSSQLKPAADKWTSSQD  
PTTLGPIWDGLHTVILSIPTVVKVAGIVPWIHPSSQLKPAADKWTSSQD  
PTTLGPIWECPHVTMLATPTAIKVTGIVPWIHHS-RLKPAIQDKWTSPQD  
PTTLGPIWECPHVTMLATPTAIKVTGIVPWIHHS-RLKPAIQDKWTSPQD  
-----  
PTTLGPIWVGLHTVILSTPSIVKVAGIVPWIHHS-WLKPEIQDKWTSSQN  
PTTLGLPLWDGPHVTILSTPTAVRVAGIVPWIHPS-WQKPAVDKWTSSQD  
PTTLEPIWDGPHPATLSTSTAVNIAEIVRWIHHHS-QLKLAADKWTSSKHD  
PTTLEPIWDGPHPATLSTSTAVNIAEIVRWIHHHS-QLKLAADKWTSSKHD  
PTTLEPIWDGPHPATLSTSTAVNIAEIVRWIHHHS-QLKLAADKWTSSKHD  
PTTLGPIWDGPHYTLTLSTSTAVKVAETVRWILHS-QLKLAAND-----  
PTSLRPIZNGPYIVILSTPTAIKVFAGIMPZIHHS-QLKLAADKWTSSQD  
PDSLGLIYZDGPCTVILSTPTAVKVFAGIMPZVHHS-QLKPAVQTSGTASK-  
HCSIPTYEZ-----EHAVFGFCP--CNS-LLRMVVSASSMSLQR  
PTTLGPIZDGPHTVILSTPTAVKVAGIVPWIHHS-QLKPAADKWTSSQD  
PTTLGPIZDGPHTVILSTPTAVKVGGILPWIHHS-QLKPAAQTSGPANRN  
PWVHTVILSTPTA-----  
PTTLRPIWDRPHHT-----  
PTILSPIWDGPHIVILSTPTVVKIAGIVPWIHHS-QLKLSAQDQWTNQD  
PPTLGPIDWDGPHVTVLSTPTAV--AGIIPWIHHS-WLKPAADQVDQVGP  
-HNLGPICDGPHVVILSTPTAVK-VEIVPWIHHD-WLKPAADQRTSZQD  
PTTLGPIWDGPHHTIILSTPTAVKVAGIVPWIHHS-ZLKPEARDKWTSHWD  
PTTLGPIWDGPHAVILSTSTAVKVAGIILWVHHS-WPKLAALDKWTSSQED  
PTTLGPIWDGPHIVIMSTPTTAVKVASITPWIHT--ADKPAASV--QDQWT  
PITLRLPLWDGPHVIMYRGKQPDIRRNPPPIFH--VVSFLFSL--VSAGL  
PTTLGPIWDGPHIVILST-TAVEVAGITPWWHHSQLKPAVTTT--QDQWT  
PSHLEPLWDGPHVTTLSTPTAVKVAGITPRVHHSQLKPAVTAT--QDQWP  
PSTLRPLZDGPHTVILSTPTAVKVSIGITPWWHHSWLKPAVATS--QDQWT  
TQPLGPIWDGPHIVILSIRTAVKVAGIIPWWHHSWLKPAATA--QDQWT  
PTTFGLWDGPHIVILPTPAAVKVAGIIPWVHHSWLKPAATA--QDQWT  
PTTLGPIWDGPHIVILSTPTAVKVAGIIPWWHHSRLKPEAATT--QDQWT  
TQPLGPIWDGPHIVILSTTTAVKVAGIIPWWHHSWLKPAATA--QDQWT  
PTTWGPIWDGPHIVIMSTPTALKVAGIVPWIHHS-LAETSSSSDSDETSGL  
PTTLGPIWDGPHIVIMSTPTALKVAGIVPWIHHSWLKPAAAVTPDDQWI  
PTTLGPIWDGPHIVIMSTPTAVKVAGIVPWIHHSWLKPAAAVTPHDDQWT  
PTTLGPIWDGPHIVIMSTPTAVKVAGIVPWIHHSWLKPAAAVTPDNDQEL  
---FFLHRHSNNLISLSFPHTSPFSSTKPPSS-WPILDGCCLFGAVGYT  
---QNRRTQP-----HPQILLATAEP-----  
MGGSCKTQCKRSTDZGAIWPSRGLQKLSSLQEHQIEQLFTQKTPSLQPKI  
---VAVMHYRRHQKAR-----MPEAKGNRKADREAKRA  
---YVPTKEETNDS-----VPSIKIHLKRHRQGE--  
-----IRIRKSEVPP-----QIPLPSVZLYLALQAL---  
---LRPGMTNGNLLLPAPTPLKRGTE-----  
EGKLEPAWEGPYLVLLTTETAVYSGKGMSSHPSESAPSRVVGHSRPG  
GGVVQLLIKPAAHILTLDVEVNIQKIEQATWLHRI TRA-----

-----LITPASKRRCHLQ-----  
-----LTPESRKRHPLQSRG-----  
K SARVTQEPLKLTQKNLKRKYGLASSGS-----  
-----DKRNLDLHIT-----  
-----  
ELFARRPPLLLPLSQTRP-----  
R-----  
TLA-----  
R-----  
ERPEYQCRNRRS-----  
LSSRTHLRGT-----  
RLIPFPVSVSQTSDSCSE-----  
PLGS-----  
SWKSQLLSPTS-----  
TLTAQHPRS-----  
-----  
SHSMGAEPLEDLKFLFRKR-----  
-----

HERVS71\_polputein  
BaEV\_M7\_pol  
HERVR\_polputein  
AKR\_MLV\_MLOGC\_RT  
GaLV\_pol  
Chr3\_158587414\_1662\_po\_C\_Ez10/  
Chr3\_79627623\_1138\_po\_C\_Ez4/7  
Chr19\_20477244\_1350\_po\_C\_Ez10/  
Chr5\_111890459\_1626\_po\_C\_Ez10/  
ChrX\_48766518\_1600\_po\_C\_Ez6/3  
ChrX\_152580713\_1572\_po\_C\_Ez10/  
ChrX\_139287533\_1154\_po\_C\_Xz8/4  
Chr2\_52615786\_912\_po\_C\_Xz11/5  
HERV-E\_4\_1  
ChrY\_21962399\_1137\_po\_C\_Xz13/9  
ChrY\_8634032\_950\_po\_C\_Xz14/10  
Chr3\_126735360\_997\_po\_C\_Xz5/10  
Chr3\_126713203\_958\_po\_C\_Xz7/8  
Chr3\_75226118\_977\_po\_C\_Xz8/9  
Chr7\_6629919\_827\_po\_C\_Xz8/7  
Chr4\_9166812\_811\_po\_C\_Xz8/10  
Chr12\_8478642\_834\_po\_C\_Xz12/7  
Chr10\_15187175\_787\_po\_C\_Xz11/5  
Chr11\_71819740\_854\_po\_C\_Xz11/9  
Chr11\_71519974\_886\_po\_C\_Xz13/9  
Chr8\_7271441\_969\_po\_C\_Xz10/6  
Chr8\_11770066\_826\_po\_C\_Xz9/8  
Chr4\_4128362\_651\_po\_C\_Xz7/11  
Chr14\_50203955\_850\_po\_C\_Xz10/8  
Chr14\_50205291\_837\_po\_C\_Xz10/8  
Chr7\_6597120\_842\_po\_C\_Xz7/7  
Chr11\_71544658\_783\_po\_C\_Xz8/13  
Chr11\_67999520\_760\_po\_C\_Xz8/8  
Chr3\_75461975\_796\_po\_C\_Xz7/9  
Chr12\_52228939\_692\_po\_C\_Xz3/10  
Chr10\_15211234\_286\_po\_C\_Xz11/1  
Chr12\_100973302\_945\_po\_C\_Xz12/  
Chr19\_9685420\_817\_po\_C\_Xz6/10  
Chr13\_40936820\_719\_po\_C\_Xz9/10  
Chr7\_63858202\_1754\_po\_C\_Rz12/9  
ERV3\_chr7q21\_AC073210\_polputei  
Chr6\_110218096\_843\_po\_C\_Xz16/8  
Chr6\_110214535\_786\_po\_C\_Xz16/8  
ChrY\_3018841\_881\_po\_C\_Rz9/12  
ChrX\_86876098\_639\_po\_C\_Xz7/8  
Chr14\_68899917\_965\_po\_C\_Xz6/8  
ChrY\_23874437\_661\_po\_C\_Xz15/9  
ChrY\_27518418\_649\_po\_C\_Xz15/9  
ChrY\_25016892\_657\_po\_C\_Xz13/12  
ChrY\_19932937\_520\_po\_C\_Xz10/14  
ChrY\_20104614\_518\_po\_C\_Xz10/14  
Chr19\_58660155\_598\_po\_C\_Xz21/1  
Chr19\_58621153\_500\_po\_C\_Xz21/1  
Chr7\_139686987\_710\_po\_C\_Xz11/7  
Chr7\_137651301\_1097\_po\_C\_Pz13/  
Chr11\_29579197\_930\_po\_C\_Pz8/12  
Chr4\_117329205\_488\_po\_C\_Xz3/16  
Chr21\_38522185\_383\_po\_C\_Xz7/9  
Chr4\_70173370\_1049\_po\_C\_Xz11/8  
Chr4\_70022513\_788\_po\_C\_Kz10/12  
Chr14\_105225894\_1027\_po\_C\_Xz13  
Chr7\_119241536\_761\_po\_C\_Xz11/1  
ChrY\_22564970\_567\_po\_C\_Xz9/10  
Chr21\_14409346\_1477\_po\_C\_Pz5/6  
ChrX\_51259700\_1396\_po\_C\_Pz7/8  
Chr6\_64985396\_1041\_po\_C\_Xz11/1  
ChrY\_20355209\_659\_po\_C\_Xz7/11  
Chr3\_34567166\_523\_po\_C\_Xz8/6  
Chr3\_122072468\_245\_po\_C\_Xz9/9  
Chr11\_58788475\_541\_po\_C\_Xz8/22  
Chr6\_137421042\_373\_po\_C\_Xz6/9  
Chr4\_115910608\_550\_po\_C\_Pz8/12  
ChrY\_13743185\_977\_po\_C\_Xz14/8  
HERV15  
ChrX\_117198092\_983\_po\_C\_Xz8/8  
Chr19\_21166030\_1412\_po\_C\_Xz9/1  
Chr19\_21213743\_913\_po\_C\_Xz14/1

WAMPLKTAHKSSEA-----  
WRLRRSEDPLKIRLSRT-----  
WRLRRSEDPLKIRLSRT-----  
WRVQRSONPLKIRLRTRE-----  
WELEKTDHPLKLRIRRRRDESA-----  
AKPS-----LDNPCKVT-----  
AKLS-----LDNPCKVTLRRTTSPAPVTPGS-----  
AKPS-----PDTPTYKVTLRRTTSPAPVTPRS-----  
AKQS-----LDNPCKVTLRR-----  
SDSE-----DDKPCSSHTRKLTGLRTAEA-----  
AKPS-----PDKPCKVTLRRTTSPVPVTPGS-----  
AKPS-----LDNPCKVT-----  
VKPS-----VDNPCKVTLR-----  
ARPSRKPL-----QSDPKKTTSPA-----  
VRPSPDNPQSDSEEDDKPCSSHMWKLTPCMAEA-----  
AKPS-----PDPNPAKRL-----  
-----  
QG-----  
QG-----  
QV-----  
QG-----  
QG-----  
SRPLD-----  
QGZCTPSDVRTNIILPPTGY-----  
QG-----  
QG-----  
-----  
QG-----  
QG-----  
QGZCTPSVTLLGLISSRPLD-----  
-----  
QG-----  
QG-----  
QGZCTPS-----  
QG-----  
LYPVPGLGPTPTPEPHSLLAQQSEIKLQGSSEAGGAPAI AEASVKGQSS  
-----  
L-----DHATQLILRGT-----  
L-----DHATS-----  
P-----DHPSWLILRRDQVA-----  
P-----DHPSWLILRRDQVA-----  
-----  
P-----DHPSRLILRREPVA-----  
P-----DHPTRLIL-----  
P-----DHLSWLIL-----  
P-----DHLSWLIL-----  
P-----DHLSWLIL-----  
P-----DHWSQLIL-----  
P-----DHWSQLIL-----  
P-----DHPTQLILRRPSCC-----  
-----TQIIQLSRS-----  
-----HELIIISYGAZ-----  
P-----DHLTQLILRWDQVA-----  
-----QTIPLG-----  
-----  
-----IDHLTRMILQ-----  
RPSDLADHAMRPRCQWR-----  
-----PDHPTQLTLRRDWPVSGEDNSPALLTSE-----  
P-----PSPRLILC-----  
P-----DHPTGLILRGTKSC-----  
SQQ-DPDHPSTDLAE--EPRHSRKR-----  
RNK-GTEYKREKZRDRVQKREILKLGVRGTS-----  
SIKPRPDTADPVVRPSHY-----  
SQQ-NPDHLTWMILR-----  
SQQ-NPDHPTRLILQ-----  
SQQ-NQDHPDWLILQETKSLLTRTTSL-----  
SQQ-YPDHPTRLSYSEIKPLLRTR-----  
SQQ-NPDHSTWLILW-----  
SQQ-NPDHPTRLETKPRLTRTTALL-----  
ANK-TQIAPPE-----  
SQK-TQIA-----  
SQQ-DPDCPTRTVLWQNPLPVRRTTALL-----  
ANK-TQITPPE-----  
CRK-AVASHLED-----

Chr19\_15957774\_569\_po\_C\_Xz8/10 -----  
Chr11\_77508681\_297\_po\_C\_Xz19/1 R-----  
Chr13\_98250769\_738\_po\_C\_Xz7/13 A-----  
Chr6\_39968183\_513\_po\_C\_Pz10/9 -----  
Chr15\_66867263\_645\_po\_C\_Xz11/1 -----  
HERV18\_polputein -----  
HERVIP10FH\_polputein KPYQTKAKKNLTLFHLFYSSS-----  
MER66\_polputein -----

HERVI\_polputein -----  
HERVIP10F\_polputein -----  
HERVadp\_AC005741 -----  
HERV-PT47D -----  
HERV\_W\_chr6\_141432567\_ERV9\_lik -----  
ERV9\_PH1\_RT -----  
Chr13\_54564403\_572\_po\_C\_Yz7/14 -----  
HERV\_Y\_chr12\_51022911\_pol -----  
HERV17\_polputein -----  
HERV\_W\_chr7\_9105739\_syncytin\_p -----  
HERV9\_polputein -----  
HUERS-P3\_polputein -----  
ERVfrd\_AC004022 -----  
PRIMA41\_polputein -----  
HERV\_H\_RGH1\_pol -----  
HERVHRGH2\_pol -----  
HERV\_H48I\_polputein -----  
HERV\_H\_RTVLH2\_pol -----  
HERVVFH21\_pol -----  
HERVRblike\_chr4\_109047953 -----  
ChrY\_13790029\_693\_po\_C\_Xz12/11 -----  
HERVS71\_polputein -----  
BaEV\_M7\_pol -----  
HERVR\_polputein -----  
AKR\_MLV\_MLOCG\_RT -----  
GaLV\_pol -----  
Chr3\_158587414\_1662\_po\_C\_Ez10/ -----  
Chr3\_79627623\_1138\_po\_C\_Ez4/7 -----  
Chr19\_20477244\_1350\_po\_C\_Ez10/ -----  
Chr5\_111890459\_1626\_po\_C\_Ez10/ -----  
ChrX\_48766518\_1600\_po\_C\_Ez6/3 -----  
ChrX\_152580713\_1572\_po\_C\_Ez10/ -----  
ChrX\_139287533\_1154\_po\_C\_Xz8/4 -----  
Chr2\_52615786\_912\_po\_C\_Xz11/5 -----  
HERV-E\_4\_1 -----  
ChrY\_21962399\_1137\_po\_C\_Xz13/9 -----  
ChrY\_8634032\_950\_po\_C\_Xz14/10 -----  
Chr3\_126735360\_997\_po\_C\_Xz5/10 -----  
Chr3\_126713203\_958\_po\_C\_Xz7/8 -----  
Chr3\_75226118\_977\_po\_C\_Xz8/9 -----  
Chr7\_6629919\_827\_po\_C\_Xz8/7 -----  
Chr4\_9166812\_811\_po\_C\_Xz8/10 -----  
Chr12\_8478642\_834\_po\_C\_Xz12/7 -----  
Chr10\_15187175\_787\_po\_C\_Xz11/5 -----  
Chr11\_71819740\_854\_po\_C\_Xz11/9 -----  
Chr11\_71519974\_886\_po\_C\_Xz13/9 -----  
Chr8\_7271441\_969\_po\_C\_Xz10/6 -----  
Chr8\_11770066\_826\_po\_C\_Xz9/8 -----  
Chr4\_4128362\_651\_po\_C\_Xz7/11 -----  
Chr14\_50203955\_850\_po\_C\_Xz10/8 -----  
Chr14\_50205291\_837\_po\_C\_Xz10/8 -----  
Chr7\_6597120\_842\_po\_C\_Xz7/7 -----  
Chr11\_71544658\_783\_po\_C\_Xz8/13 -----  
Chr11\_67999520\_760\_po\_C\_Xz8/8 -----  
Chr3\_75461975\_796\_po\_C\_Xz7/9 -----  
Chr12\_52228939\_692\_po\_C\_Xz3/10 -----  
Chr10\_15211234\_286\_po\_C\_Xz11/1 -----  
Chr12\_100973302\_945\_po\_C\_Xz12/ WEARTGWSPPQLKEACLPLZAPPLGAGHSQTKGSRNLCGLKCPCLTALKR  
Chr19\_9685420\_817\_po\_C\_Xz6/10 -----  
Chr13\_40936820\_719\_po\_C\_Xz9/10 -----  
Chr7\_63858202\_1754\_po\_C\_Rz12/9 -----  
ERV3\_chr7q21\_AC073210\_polputei -----  
Chr6\_110218096\_843\_po\_C\_Xz16/8 -----  
Chr6\_110214535\_786\_po\_C\_Xz16/8 -----  
ChrY\_3018841\_881\_po\_C\_Rz9/12 -----  
ChrX\_86876098\_639\_po\_C\_Xz7/8 -----  
Chr14\_68899917\_965\_po\_C\_Xz6/8 -----

ChrY\_23874437\_661\_po\_C\_Xz15/9 -----  
ChrY\_27518418\_649\_po\_C\_Xz15/9 -----  
ChrY\_25016892\_657\_po\_C\_Xz13/12 -----  
ChrY\_19932937\_520\_po\_C\_Xz10/14 -----  
ChrY\_20104614\_518\_po\_C\_Xz10/14 -----  
Chr19\_58660155\_598\_po\_C\_Xz21/1 -----  
Chr19\_58621153\_500\_po\_C\_Xz21/1 -----  
Chr7\_139686987\_710\_po\_C\_Xz11/7 -----  
Chr7\_137651301\_1097\_po\_C\_Pz13/ -----  
Chr11\_29579197\_930\_po\_C\_Pz8/12 -----  
Chr4\_117329205\_488\_po\_C\_Xz3/16 -----  
Chr21\_38522185\_383\_po\_C\_Xz7/9 -----  
Chr4\_70173370\_1049\_po\_C\_Xz11/8 -----  
Chr4\_70022513\_788\_po\_C\_Kz10/12 -----  
Chr14\_105225894\_1027\_po\_C\_Xz13 -----  
Chr7\_119241536\_761\_po\_C\_Xz11/1 -----  
ChrY\_22564970\_567\_po\_C\_Xz9/10 -----  
Chr21\_14409346\_1477\_po\_C\_Pz5/6 -----  
ChrX\_51259700\_1396\_po\_C\_Pz7/8 -----  
Chr6\_64985396\_1041\_po\_C\_Xz11/1 -----  
ChrY\_20355209\_659\_po\_C\_Xz7/11 -----  
Chr3\_34567166\_523\_po\_C\_Xz8/6 -----  
Chr3\_122072468\_245\_po\_C\_Xz9/9 -----  
Chr11\_58788475\_541\_po\_C\_Xz8/22 -----  
Chr6\_137421042\_373\_po\_C\_Xz6/9 -----  
Chr4\_115910608\_550\_po\_C\_Pz8/12 -----  
ChrY\_13743185\_977\_po\_C\_Xz14/8 -----  
HERV15 -----  
ChrX\_117198092\_983\_po\_C\_Xz8/8 -----  
Chr19\_21166030\_1412\_po\_C\_Xz9/1 -----  
Chr19\_21213743\_913\_po\_C\_Xz14/1 -----  
Chr19\_15957774\_569\_po\_C\_Xz8/10 -----  
Chr11\_77508681\_297\_po\_C\_Xz19/1 -----  
Chr13\_98250769\_738\_po\_C\_Xz7/13 -----  
Chr6\_39968183\_513\_po\_C\_Pz10/9 -----  
Chr15\_66867263\_645\_po\_C\_Xz11/1 -----  
HERV18\_polputein -----  
HERVIP10FH\_polputein -----  
MER66\_polputein -----

HERVI\_polputein -----  
HERVIP10F\_polputein -----  
HERVadp\_AC005741 -----  
HERV-PT47D -----  
HERV\_W\_chr6\_141432567\_ERV9\_lik -----  
ERV9\_PH1\_RT -----  
Chr13\_54564403\_572\_po\_C\_Yz7/14 -----  
HERV\_Y\_chr12\_51022911\_pol -----  
HERV17\_polputein -----  
HERV\_W\_chr7\_9105739\_syncytin\_p -----  
HERV9\_polputein -----  
HUERS-P3\_polputein -----  
ERVfrd\_AC004022 -----  
PRIMA41\_polputein -----  
HERV\_H\_RGH1\_pol -----  
HERVHRGH2\_pol -----  
HERV\_H48I\_polputein -----  
HERV\_H\_RTVLH2\_pol -----  
HERVVFH21\_pol -----  
HERVRblike\_chr4\_109047953 -----  
ChrY\_13790029\_693\_po\_C\_Xz12/11 -----  
HERVS71\_polputein -----  
BaEV\_M7\_pol -----  
HERVR\_polputein -----  
AKR\_MLV\_MLOCG\_RT -----  
GaLV\_pol -----  
Chr3\_158587414\_1662\_po\_C\_Ez10/ -----  
Chr3\_79627623\_1138\_po\_C\_Ez4/7 -----  
Chr19\_20477244\_1350\_po\_C\_Ez10/ -----  
Chr5\_111890459\_1626\_po\_C\_Ez10/ -----  
ChrX\_48766518\_1600\_po\_C\_Ez6/3 -----  
ChrX\_152580713\_1572\_po\_C\_Ez10/ -----  
ChrX\_139287533\_1154\_po\_C\_Xz8/4 -----  
Chr2\_52615786\_912\_po\_C\_Xz11/5 -----  
HERV-E\_4\_1 -----  
ChrY\_21962399\_1137\_po\_C\_Xz13/9 -----

```

ChrY_8634032_950_po_C_Xz14/10 -----
Chr3_126735360_997_po_C_Xz5/10 -----
Chr3_126713203_958_po_C_Xz7/8 -----
Chr3_75226118_977_po_C_Xz8/9 -----
Chr7_6629919_827_po_C_Xz8/7 -----
Chr4_9166812_811_po_C_Xz8/10 -----
Chr12_8478642_834_po_C_Xz12/7 -----
Chr10_15187175_787_po_C_Xz11/5 -----
Chr11_71819740_854_po_C_Xz11/9 -----
Chr11_71519974_886_po_C_Xz13/9 -----
Chr8_7271441_969_po_C_Xz10/6 -----
Chr8_11770066_826_po_C_Xz9/8 -----
Chr4_4128362_651_po_C_Xz7/11 -----
Chr14_50203955_850_po_C_Xz10/8 -----
Chr14_50205291_837_po_C_Xz10/8 -----
Chr7_6597120_842_po_C_Xz7/7 -----
Chr11_71544658_783_po_C_Xz8/13 -----
Chr11_67999520_760_po_C_Xz8/8 -----
Chr3_75461975_796_po_C_Xz7/9 -----
Chr12_52228939_692_po_C_Xz3/10 -----
Chr10_15211234_286_po_C_Xz11/1 -----
Chr12_100973302_945_po_C_Xz12/ VVVLPAHSLRSENGQNASSGSLTPEZPNWEATPSRGT
Chr19_9685420_817_po_C_Xz6/10 -----
Chr13_40936820_719_po_C_Xz9/10 -----
Chr7_63858202_1754_po_C_Rz12/9 -----
ERV3_chr7q21_AC073210_polputei -----
Chr6_110218096_843_po_C_Xz16/8 -----
Chr6_110214535_786_po_C_Xz16/8 -----
ChrY_3018841_881_po_C_Rz9/12 -----
ChrX_86876098_639_po_C_Xz7/8 -----
Chr14_68899917_965_po_C_Xz6/8 -----
ChrY_23874437_661_po_C_Xz15/9 -----
ChrY_27518418_649_po_C_Xz15/9 -----
ChrY_25016892_657_po_C_Xz13/12 -----
ChrY_19932937_520_po_C_Xz10/14 -----
ChrY_20104614_518_po_C_Xz10/14 -----
Chr19_58660155_598_po_C_Xz21/1 -----
Chr19_58621153_500_po_C_Xz21/1 -----
Chr7_139686987_710_po_C_Xz11/7 -----
Chr7_137651301_1097_po_C_Pz13/ -----
Chr11_29579197_930_po_C_Pz8/12 -----
Chr4_117329205_488_po_C_Xz3/16 -----
Chr21_38522185_383_po_C_Xz7/9 -----
Chr4_70173370_1049_po_C_Xz11/8 -----
Chr4_70022513_788_po_C_Kz10/12 -----
Chr14_105225894_1027_po_C_Xz13 -----
Chr7_119241536_761_po_C_Xz11/1 -----
ChrY_22564970_567_po_C_Xz9/10 -----
Chr21_14409346_1477_po_C_Pz5/6 -----
ChrX_51259700_1396_po_C_Pz7/8 -----
Chr6_64985396_1041_po_C_Xz11/1 -----
ChrY_20355209_659_po_C_Xz7/11 -----
Chr3_34567166_523_po_C_Xz8/6 -----
Chr3_122072468_245_po_C_Xz9/9 -----
Chr11_58788475_541_po_C_Xz8/22 -----
Chr6_137421042_373_po_C_Xz6/9 -----
Chr4_115910608_550_po_C_Pz8/12 -----
ChrY_13743185_977_po_C_Xz14/8 -----
HERV15 -----
ChrX_117198092_983_po_C_Xz8/8 -----
Chr19_21166030_1412_po_C_Xz9/1 -----
Chr19_21213743_913_po_C_Xz14/1 -----
Chr19_15957774_569_po_C_Xz8/10 -----
Chr11_77508681_297_po_C_Xz19/1 -----
Chr13_98250769_738_po_C_Xz7/13 -----
Chr6_39968183_513_po_C_Pz10/9 -----
Chr15_66867263_645_po_C_Xz11/1 -----
HERV18_polputein -----
HERVIP10FH_polputein -----
MER66_polputein -----

```

Alignment made 2004/01/03 11:55:49 with FASTA file C:\RETROVIRALA SEKVENSER FÖR DATABAS\HERV COLLECTIONS\ERV3 BROADLY 040102\_FASTA POLPUTEIN2 W MANY GAMMARETROVIRAL POLS.TXT).

NJ tree made from this alignment, .DND format:





:0.00204)  
:0.00870,  
ChrY\_21962399\_1137\_po\_C\_Xz13/9:0.15482)  
:0.01170,  
ChrY\_8634032\_950\_po\_C\_Xz14/10:0.17634)  
:0.02880,  
(  
(  
(  
(  
(  
(  
(  
Chr3\_126735360\_997\_po\_C\_Xz5/10:0.10540,  
Chr3\_126713203\_958\_po\_C\_Xz7/8:0.07281)  
:0.01287,  
(  
(  
(  
(  
Chr3\_75226118\_977\_po\_C\_Xz8/9:0.06647,  
Chr7\_6629919\_827\_po\_C\_Xz8/7:0.06885)  
:0.00317,  
Chr4\_9166812\_811\_po\_C\_Xz8/10:0.08986)  
:0.00452,  
(  
Chr11\_71819740\_854\_po\_C\_Xz11/9:0.07856,  
(  
Chr12\_8478642\_834\_po\_C\_Xz12/7:0.06071,  
Chr10\_15187175\_787\_po\_C\_Xz11/5:0.05140)  
:0.02049)  
:0.01045)  
:0.00255,  
Chr11\_71519974\_886\_po\_C\_Xz13/9:0.08787)  
:0.01410)  
:0.01370,  
(  
Chr8\_7271441\_969\_po\_C\_Xz10/6:0.10287,  
Chr8\_11770066\_826\_po\_C\_Xz9/8:0.10687)  
:0.01295)  
:0.01001,  
Chr4\_4128362\_651\_po\_C\_Xz7/11:0.13419)  
:0.00890,  
(  
(  
(  
(  
Chr14\_50203955\_850\_po\_C\_Xz10/8:0.00000,  
Chr14\_50205291\_837\_po\_C\_Xz10/8:0.00000)  
:0.09597,  
Chr7\_6597120\_842\_po\_C\_Xz7/7:0.09870)  
:0.00300,  
(  
Chr11\_71544658\_783\_po\_C\_Xz8/13:0.10530,  
Chr11\_67999520\_760\_po\_C\_Xz8/8:0.09169)  
:0.00986)  
:0.02494,  
Chr3\_75461975\_796\_po\_C\_Xz7/9:0.10903)  
:0.00932)  
:0.03343,  
Chr12\_52228939\_692\_po\_C\_Xz3/10:0.14306)  
:0.00445,  
Chr10\_15211234\_286\_po\_C\_Xz11/1:0.22867)  
:0.04192,  
(  
Chr12\_100973302\_945\_po\_C\_Xz12/:0.16674,  
Chr19\_9685420\_817\_po\_C\_Xz6/10:0.14795)  
:0.04551)  
:0.01232)  
:0.01851,  
Chr13\_40936820\_719\_po\_C\_Xz9/10:0.30616)  
:0.06958,  
(  
(  
(  
ChrY\_13790029\_693\_po\_C\_Xz12/11:0.17446,

HERVS71\_polputein:0.15622)  
:0.11387,  
(  
(  
(  
BaEV\_M7\_pol:0.00000,  
HERVR\_polputein:0.00000)  
:0.16884,  
AKR\_MLV\_MLOGC\_RT:0.16791)  
:0.01110,  
GaLV\_pol:0.16976)  
:0.07735)  
:0.03553,  
(  
(  
(  
(  
(  
(  
(  
Chr13\_54564403\_572\_po\_C\_Yz7/14:0.23695,  
(  
HERV\_W\_chr6\_141432567\_ERV9\_lik:0.14606,  
ERV9\_PH1\_RT:0.17126)  
:0.05120)  
:0.05484,  
(  
(  
HERV\_W\_chr7\_9105739\_syncytin\_p:0.09486,  
(  
HERV\_Y\_chr12\_51022911\_pol:0.07995,  
HERV17\_polputein:0.04518)  
:0.01539)  
:0.07161,  
HERV9\_polputein:0.18484)  
:0.04678)  
:0.03319,  
HUERS-P3\_polputein:0.22375)  
:0.03135,  
ERVfrd\_AC004022:0.32134)  
:0.00720,  
PRIMA41\_polputein:0.29585)  
:0.01330,  
(  
(  
HERV\_H\_RTVLH2\_pol:0.32657,  
(  
(  
HERV\_H\_RGH1\_pol:0.08547,  
HERVHRGH2\_pol:0.09064)  
:0.17881,  
HERV\_H48I\_polputein:0.22414)  
:0.01565)  
:0.01498,  
HERVVFH21\_pol:0.26355)  
:0.04933)  
:0.00824,  
HERVRblike\_chr4\_109047953:0.31393)  
:0.01482,  
(  
(  
(  
(  
(  
HERVI\_polputein:0.14200,  
HERVIP10F\_polputein:0.11800)  
:0.08763,  
HERVadp\_AC005741:0.22944)  
:0.06045,  
HERV-PT47D:0.38866)  
:0.03964,  
(  
HERVIP10FH\_polputein:0.43920,  
MER66\_polputein:0.48413)  
:0.05872)  
:0.01054,

HERV18\_polputein:0.44678)  
:0.03561)  
:0.01536)  
:0.01675)  
:0.03943,  
(  
(  
(  
Chr13\_98250769\_738\_po\_C\_Xz7/13:0.28043,  
(  
Chr19\_15957774\_569\_po\_C\_Xz8/10:0.29503,  
Chr11\_77508681\_297\_po\_C\_Xz19/1:0.34949)  
:0.05529)  
:0.02257,  
Chr6\_39968183\_513\_po\_C\_Pz10/9:0.27981)  
:0.02052,  
Chr15\_66867263\_645\_po\_C\_Xz11/1:0.36463)  
:0.00937)  
:0.02833,  
(  
(  
(  
Chr21\_14409346\_1477\_po\_C\_Pz5/6:0.12700,  
ChrX\_51259700\_1396\_po\_C\_Pz7/8:0.13264)  
:0.03197,  
(  
(  
(  
Chr6\_64985396\_1041\_po\_C\_Xz11/1:0.14250,  
ChrY\_20355209\_659\_po\_C\_Xz7/11:0.16093)  
:0.00774,  
(  
Chr3\_34567166\_523\_po\_C\_Xz8/6:0.12174,  
Chr3\_122072468\_245\_po\_C\_Xz9/9:0.11826)  
:0.01147)  
:0.02584,  
(  
Chr4\_115910608\_550\_po\_C\_Pz8/12:0.16409,  
(  
Chr11\_58788475\_541\_po\_C\_Xz8/22:0.17937,  
Chr6\_137421042\_373\_po\_C\_Xz6/9:0.22958)  
:0.04106)  
:0.05695)  
:0.01290)  
:0.04554,  
(  
(  
Chr19\_21166030\_1412\_po\_C\_Xz9/1:0.14707,  
(  
ChrX\_117198092\_983\_po\_C\_Xz8/8:0.10323,  
(  
ChrY\_13743185\_977\_po\_C\_Xz14/8:0.06351,  
HERV15:0.04265)  
:0.06903)  
:0.00783)  
:0.03603,  
Chr19\_21213743\_913\_po\_C\_Xz14/1:0.23241)  
:0.05142)  
:0.01223)  
:0.00066,  
ChrY\_22564970\_567\_po\_C\_Xz9/10:0.23633)  
:0.01573)  
:0.00798,  
(  
(  
(  
Chr7\_137651301\_1097\_po\_C\_Pz13/:0.16191,  
Chr11\_29579197\_930\_po\_C\_Pz8/12:0.15730)  
:0.01091,  
(  
Chr4\_117329205\_488\_po\_C\_Xz3/16:0.18217,  
Chr21\_38522185\_383\_po\_C\_Xz7/9:0.16852)  
:0.13443)  
:0.00504,  
(  
(  
Chr4\_70173370\_1049\_po\_C\_Xz11/8:0.13287,

Chr4\_70022513\_788\_po\_C\_Kz10/12:0.14736)  
:0.03301,  
Chr14\_105225894\_1027\_po\_C\_Xz13:0.18127)  
:0.02182)  
:0.00332,  
Chr7\_119241536\_761\_po\_C\_Xz11/1:0.21687);

# Segregation of 76 ERV3-related retroviral sequences found via Pol aa

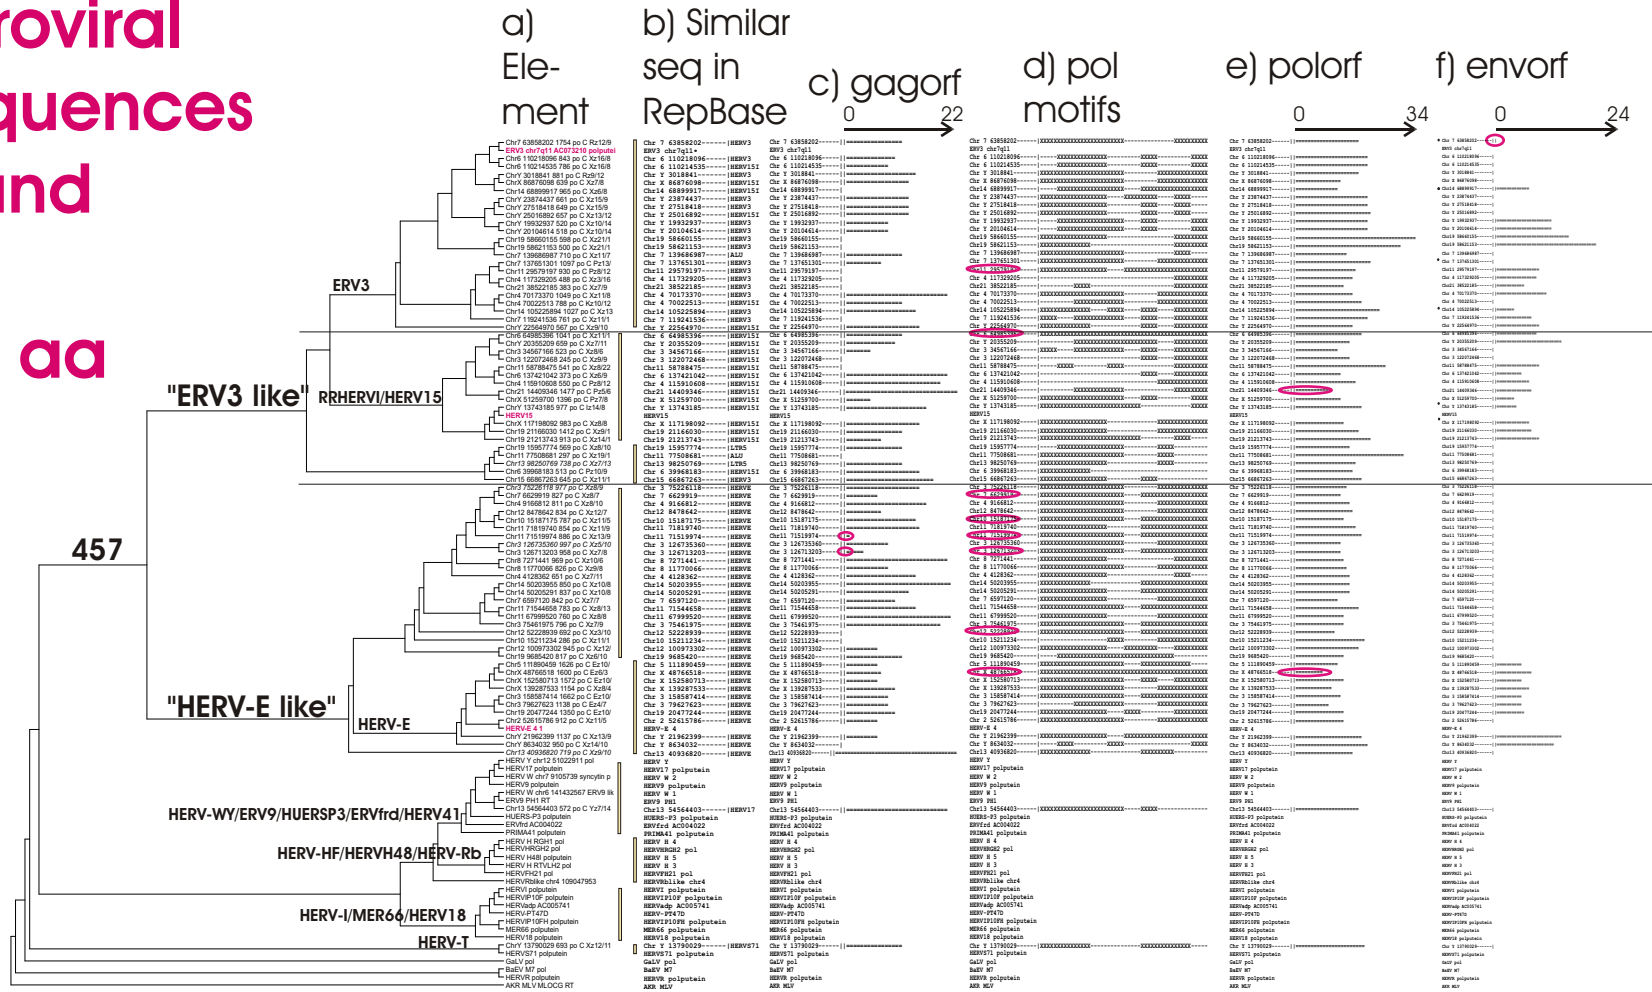

The cladogram shows

- RetroTector defined elements from the hg15 version of the human genome, written as chromosome, position, RetroTector chain score, RetroTector genus assignment, "po" for "pol", PBS (X=not determined) "z", number of stops in *pol*, "/" , number of frameshifts in *pol*.
  - Similar elements detected in RepBase, based on nucleotide identity.
  - Sum of stops and frameshifts in *gag*, shown graphically as columns of X'es. The elements most intact in *gag* are encircled in red.
  - Presence of motifs in the Pol protein is shown as "XX" for presence and as "--" for absence. The most intact elements in *pol* are encircled in red.
  - Sum of stops and frameshifts in *pol*, shown graphically as columns of X'es. The elements most intact in *pol* are encircled in red.
  - Sum of stops and frameshifts in *env*, shown graphically as columns of X'es. The elements most intact in *env* are encircled in red.
- Reference elements are shown without the information in a-e

# Similarity of ERV3-like and HERVE-like sequences in Pol to each other and to other gammaretroviruses

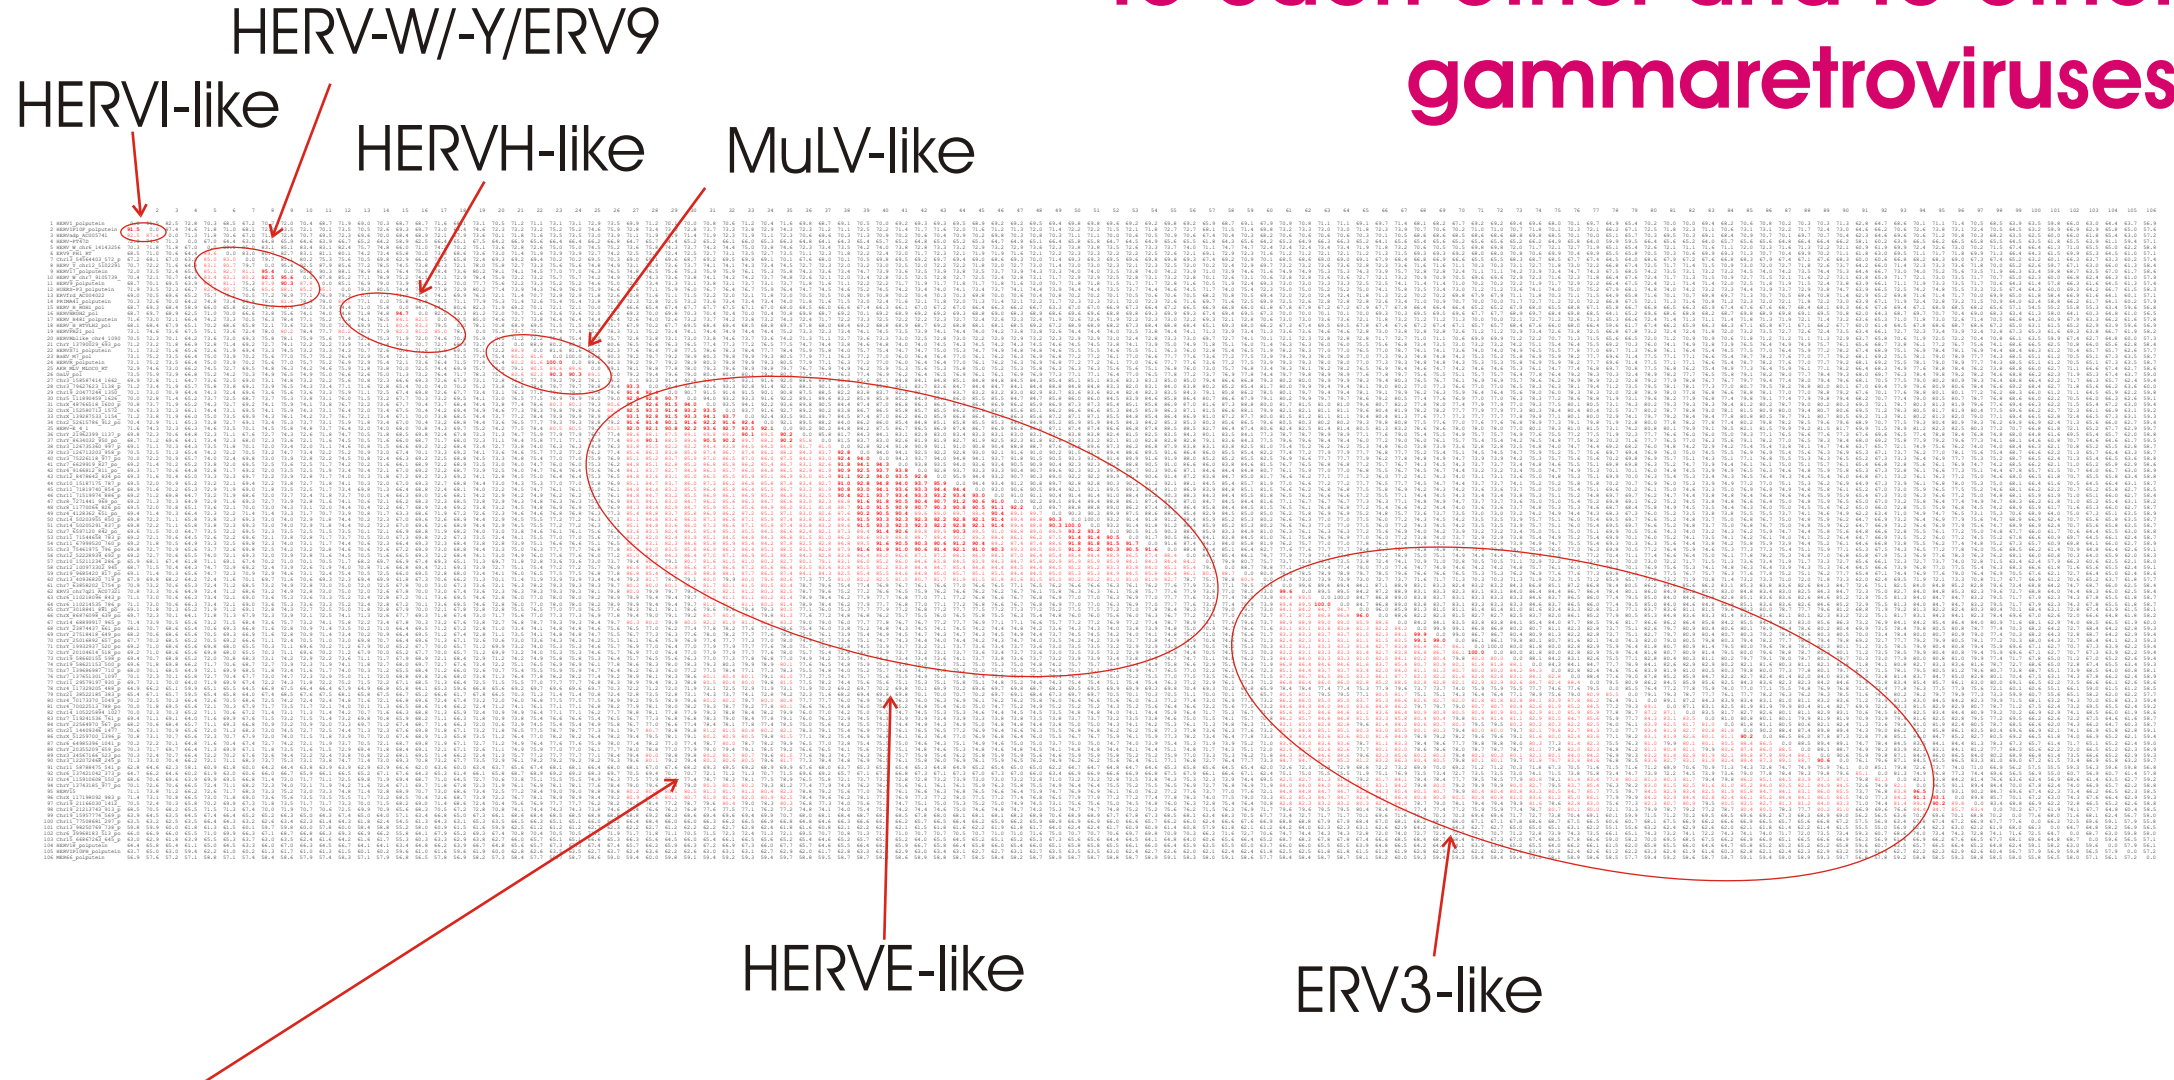

HERVE-like and ERV3-like elements do not segregate completely.

Similarities > 80% are shown in red.

# Distance matrix of env pteins from 33 ERV3-related sequences.

Distances (% of self similarity) were calculated using the PAM250 matrix and a Clustal W alignment.

|                          | 1     | 2    | 3     | 4     | 5     | 6     | 7     | 8     | 9     | 10    | 11    | 12    | 13    | 14    | 15    | 16    | 17    | 18    | 19   | 20    | 21    | 22    | 23    | 24    | 25    | 26    | 27   | 28    | 29    | 30    | 31    | 32   | 33   |      |
|--------------------------|-------|------|-------|-------|-------|-------|-------|-------|-------|-------|-------|-------|-------|-------|-------|-------|-------|-------|------|-------|-------|-------|-------|-------|-------|-------|------|-------|-------|-------|-------|------|------|------|
| 1 ChrY_19932937_520_en   | 100.0 | 89.6 | 82.1  | 79.8  | 74.7  | 81.0  | 81.3  | 81.3  | 74.6  | 76.3  | 75.0  | 75.6  | 77.6  | 72.5  | 74.8  | 81.6  | 77.1  | 82.5  | 76.3 | 76.5  | 76.8  | 73.2  | 73.0  | 72.2  | 72.9  | 73.4  | 70.4 | 71.0  | 62.4  | 62.3  | 70.3  | 62.1 |      |      |
| 2 ChrY_20104614_518_en   | 200.0 | 0.0  | 85.6  | 82.2  | 79.8  | 74.7  | 81.0  | 81.3  | 81.3  | 74.6  | 76.3  | 75.0  | 75.6  | 77.6  | 72.5  | 74.8  | 81.6  | 77.1  | 82.5 | 76.3  | 76.5  | 76.8  | 73.2  | 73.0  | 72.2  | 72.9  | 73.4 | 70.4  | 71.0  | 62.4  | 62.3  | 70.3 | 62.1 |      |
| 3 Chr7_63858202_1754_e   | 85.6  | 85.6 | 100.0 | 86.9  | 83.2  | 77.6  | 88.1  | 87.9  | 85.4  | 79.1  | 81.3  | 78.7  | 78.8  | 83.4  | 76.4  | 77.6  | 88.4  | 80.9  | 88.7 | 80.6  | 82.1  | 83.7  | 76.6  | 76.7  | 75.9  | 76.4  | 77.1 | 74.4  | 75.3  | 64.4  | 63.9  | 74.0 | 64.0 |      |
| 4 Chr7_119241536_761_e   | 82.1  | 82.1 | 86.9  | 100.0 | 82.8  | 76.8  | 83.3  | 84.9  | 82.9  | 78.0  | 80.3  | 77.3  | 77.2  | 80.6  | 73.9  | 74.2  | 85.3  | 78.8  | 85.1 | 77.4  | 78.8  | 79.9  | 73.6  | 73.7  | 73.1  | 73.3  | 73.5 | 72.4  | 72.6  | 64.1  | 63.2  | 71.0 | 63.5 |      |
| 5 Chr19_58660155_598_e   | 79.8  | 79.8 | 83.2  | 82.6  | 100.0 | 84.6  | 84.8  | 82.8  | 81.6  | 78.5  | 80.3  | 76.7  | 76.9  | 80.1  | 74.1  | 77.0  | 84.8  | 78.5  | 84.5 | 78.0  | 78.2  | 79.5  | 73.0  | 73.4  | 72.3  | 72.9  | 72.8 | 72.4  | 72.5  | 67.8  | 65.3  | 73.9 | 67.3 |      |
| 6 Chr19_58621153_500_e   | 74.7  | 74.7 | 77.7  | 76.8  | 84.6  | 100.0 | 83.3  | 80.8  | 78.2  | 74.6  | 77.1  | 74.3  | 73.6  | 78.1  | 72.1  | 76.5  | 83.4  | 75.0  | 83.1 | 76.7  | 76.4  | 77.3  | 69.9  | 71.1  | 70.1  | 69.7  | 70.6 | 69.8  | 69.5  | 66.8  | 63.9  | 73.4 | 66.8 |      |
| 7 Chr14_105225894_1027_e | 81.0  | 81.0 | 88.1  | 83.3  | 84.8  | 83.3  | 100.0 | 85.5  | 85.1  | 83.4  | 83.6  | 82.3  | 81.3  | 80.1  | 80.0  | 83.0  | 87.9  | 84.0  | 87.4 | 78.9  | 79.3  | 80.7  | 76.9  | 78.1  | 76.6  | 77.0  | 77.5 | 76.1  | 76.3  | 67.5  | 68.1  | 74.7 | 66.5 |      |
| 8 Chr14_68899917_965_e   | 81.3  | 81.3 | 87.1  | 84.9  | 82.8  | 80.8  | 85.5  | 100.0 | 86.5  | 82.8  | 83.7  | 82.9  | 80.7  | 80.8  | 78.5  | 82.2  | 85.8  | 82.4  | 86.0 | 79.1  | 80.5  | 81.7  | 78.4  | 79.4  | 78.0  | 78.5  | 79.3 | 77.2  | 77.7  | 66.5  | 66.9  | 75.0 | 66.9 |      |
| 9 Chr11_29579197_930_e   | 81.3  | 81.3 | 85.4  | 82.9  | 81.6  | 78.2  | 85.1  | 86.5  | 100.0 | 79.7  | 82.2  | 80.1  | 78.8  | 79.2  | 73.8  | 74.2  | 85.5  | 82.0  | 85.2 | 78.0  | 79.2  | 80.1  | 75.3  | 76.5  | 75.9  | 76.1  | 75.6 | 74.8  | 74.3  | 66.1  | 65.1  | 73.6 | 66.6 |      |
| 10 Chr21_14409346_1477_e | 74.6  | 74.6 | 79.1  | 78.0  | 78.5  | 74.7  | 83.4  | 82.8  | 79.7  | 100.0 | 90.0  | 89.3  | 88.8  | 86.4  | 83.6  | 85.7  | 86.0  | 82.8  | 85.3 | 77.3  | 78.6  | 80.9  | 76.4  | 76.6  | 75.4  | 75.4  | 76.6 | 73.3  | 75.1  | 67.3  | 65.4  | 70.8 | 63.5 |      |
| 11 ChrX_51259700_1396_e  | 76.3  | 76.3 | 81.3  | 80.3  | 80.3  | 77.1  | 83.6  | 83.7  | 82.2  | 90.0  | 100.0 | 90.7  | 90.7  | 86.8  | 85.3  | 91.0  | 86.9  | 85.7  | 86.1 | 78.7  | 79.5  | 80.5  | 76.5  | 77.3  | 75.7  | 76.4  | 76.9 | 74.3  | 75.2  | 69.6  | 68.1  | 72.6 | 65.5 |      |
| 12 Chr6_64985396_1041_e  | 75.0  | 75.0 | 78.7  | 77.3  | 76.7  | 74.3  | 82.8  | 82.9  | 80.1  | 89.3  | 90.7  | 100.0 | 91.7  | 86.5  | 88.6  | 88.7  | 87.1  | 83.8  | 86.6 | 79.5  | 80.2  | 81.5  | 74.5  | 75.7  | 74.5  | 75.0  | 75.7 | 73.3  | 74.5  | 67.7  | 66.0  | 72.1 | 64.8 |      |
| 13 Chr6_137421042_373_e  | 75.6  | 75.6 | 78.8  | 77.2  | 76.9  | 73.6  | 81.1  | 80.7  | 78.8  | 88.8  | 90.7  | 91.7  | 100.0 | 88.6  | 87.5  | 88.2  | 86.3  | 83.2  | 85.6 | 78.5  | 78.4  | 79.8  | 73.7  | 74.8  | 74.1  | 74.1  | 74.3 | 72.5  | 72.7  | 67.3  | 64.7  | 70.7 | 64.4 |      |
| 14 Chr4_115910608_550_e  | 77.6  | 77.6 | 83.4  | 80.6  | 80.1  | 78.1  | 80.1  | 80.8  | 79.2  | 86.4  | 86.9  | 88.5  | 88.6  | 100.0 | 86.1  | 83.1  | 81.8  | 82.7  | 81.5 | 75.5  | 76.2  | 77.1  | 77.4  | 77.9  | 76.7  | 76.9  | 77.3 | 74.8  | 74.7  | 63.8  | 65.4  | 68.2 | 60.7 |      |
| 15 ChrY_20355209_659_en  | 72.5  | 72.5 | 76.4  | 73.9  | 74.1  | 72.1  | 80.0  | 78.5  | 73.8  | 83.6  | 85.7  | 88.6  | 87.5  | 86.1  | 100.0 | 87.3  | 83.0  | 79.7  | 83.1 | 75.7  | 75.9  | 78.2  | 71.0  | 72.3  | 70.8  | 71.2  | 71.8 | 71.4  | 70.2  | 64.9  | 64.7  | 70.5 | 64.7 |      |
| 16 Chr11_58788475_541_e  | 74.8  | 74.8 | 77.6  | 74.2  | 77.0  | 76.5  | 83.0  | 82.2  | 74.2  | 85.7  | 91.1  | 88.7  | 88.2  | 83.1  | 87.3  | 100.0 | 88.6  | 81.1  | 87.1 | 84.7  | 83.8  | 84.1  | 73.6  | 74.4  | 72.9  | 74.4  | 74.8 | 77.1  | 73.4  | 72.0  | 70.5  | 82.4 | 70.4 |      |
| 17 Chr19_21166030_1412_e | 81.6  | 81.6 | 88.4  | 85.3  | 84.8  | 83.4  | 87.9  | 85.8  | 85.5  | 86.0  | 86.9  | 87.1  | 86.3  | 81.8  | 83.0  | 88.6  | 100.0 | 92.2  | 91.8 | 80.4  | 82.4  | 82.0  | 81.6  | 82.9  | 80.0  | 81.8  | 81.8 | 79.5  | 80.2  | 69.9  | 74.2  | 74.5 | 66.2 |      |
| 18 ChrX_117198092_983_e  | 77.1  | 77.1 | 80.9  | 78.8  | 78.5  | 75.0  | 84.0  | 82.5  | 82.0  | 82.8  | 85.7  | 83.8  | 83.2  | 82.7  | 79.7  | 81.1  | 92.2  | 100.0 | 93.2 | 81.1  | 80.6  | 81.5  | 74.4  | 75.6  | 74.8  | 74.6  | 75.3 | 74.3  | 73.9  | 67.2  | 66.9  | 74.7 | 65.4 |      |
| 19 ChrY_13743185_977_en  | 82.5  | 82.5 | 88.7  | 85.1  | 84.5  | 83.1  | 87.4  | 86.0  | 85.2  | 85.3  | 86.1  | 86.6  | 85.6  | 81.5  | 83.3  | 87.1  | 91.8  | 100.0 | 92.0 | 80.0  | 80.7  | 80.7  | 80.4  | 81.9  | 78.9  | 80.8  | 81.0 | 78.2  | 78.3  | 69.4  | 74.6  | 75.5 | 65.9 |      |
| 20 ChrY_22564970_567_en  | 76.3  | 76.3 | 80.6  | 77.4  | 78.0  | 76.7  | 78.9  | 79.1  | 78.0  | 77.3  | 78.7  | 79.5  | 78.5  | 75.5  | 75.7  | 84.7  | 80.4  | 81.1  | 80.0 | 100.0 | 90.0  | 76.0  | 76.1  | 75.5  | 76.5  | 75.2  | 75.9 | 76.2  | 76.2  | 73.6  | 68.3  | 70.3 | 73.0 | 66.0 |
| 21 Chr3_158587414_1662_e | 76.5  | 76.5 | 82.1  | 78.8  | 78.2  | 76.4  | 79.3  | 80.5  | 79.2  | 78.6  | 79.5  | 80.2  | 78.4  | 76.2  | 75.9  | 83.8  | 82.4  | 80.6  | 80.7 | 76.0  | 100.0 | 90.6  | 89.9  | 90.4  | 89.8  | 89.5  | 88.9 | 85.1  | 85.8  | 66.0  | 69.2  | 71.2 | 64.4 |      |
| 22 ChrX_152580713_1572_e | 76.8  | 76.8 | 83.7  | 79.9  | 79.5  | 77.3  | 80.7  | 81.7  | 80.1  | 80.9  | 80.5  | 81.5  | 79.8  | 77.1  | 78.2  | 84.1  | 82.0  | 81.5  | 80.7 | 76.1  | 90.6  | 100.0 | 91.0  | 92.9  | 91.3  | 91.1  | 90.7 | 87.5  | 87.2  | 66.8  | 69.6  | 71.9 | 65.3 |      |
| 23 Chr5_111890459_1626_e | 73.2  | 73.2 | 76.3  | 73.6  | 73.0  | 69.9  | 76.9  | 78.4  | 75.3  | 76.4  | 76.5  | 74.5  | 73.7  | 77.4  | 71.0  | 73.6  | 81.6  | 74.4  | 80.4 | 75.1  | 89.9  | 91.0  | 100.0 | 93.8  | 92.5  | 92.3  | 90.9 | 88.5  | 88.0  | 64.1  | 63.5  | 70.5 | 63.3 |      |
| 24 Chr3_79627623_1138_e  | 73.0  | 73.0 | 76.7  | 73.7  | 73.4  | 71.1  | 78.1  | 79.4  | 76.5  | 76.6  | 77.3  | 75.7  | 74.8  | 77.9  | 72.3  | 74.4  | 82.9  | 75.6  | 81.9 | 76.3  | 90.4  | 92.9  | 93.8  | 100.0 | 93.3  | 92.3  | 91.7 | 88.7  | 88.5  | 64.2  | 63.4  | 71.5 | 63.8 |      |
| 25 ChrX_48766518_1600_e  | 72.2  | 72.2 | 75.9  | 73.1  | 72.3  | 70.1  | 76.6  | 78.0  | 75.9  | 75.4  | 75.7  | 74.5  | 74.1  | 76.7  | 70.8  | 72.9  | 80.0  | 74.8  | 78.9 | 75.2  | 89.8  | 91.3  | 92.5  | 93.3  | 100.0 | 91.7  | 91.2 | 87.2  | 88.0  | 63.8  | 63.1  | 70.1 | 63.9 |      |
| 26 Chr19_20477244_1350_e | 72.9  | 72.9 | 76.4  | 73.3  | 72.9  | 69.7  | 77.0  | 78.5  | 76.1  | 75.4  | 76.4  | 75.0  | 74.1  | 76.9  | 71.2  | 74.4  | 81.8  | 74.6  | 80.8 | 75.9  | 89.5  | 91.1  | 92.8  | 92.9  | 91.7  | 100.0 | 90.7 | 88.0  | 87.7  | 63.0  | 63.5  | 70.9 | 61.7 |      |
| 27 ChrX_139287533_1154_e | 73.4  | 73.4 | 77.1  | 73.5  | 72.8  | 70.6  | 76.7  | 77.5  | 79.3  | 75.6  | 76.6  | 76.9  | 75.7  | 74.3  | 77.3  | 71.8  | 74.8  | 81.8  | 75.3 | 81.0  | 76.2  | 88.9  | 90.7  | 90.9  | 91.7  | 91.2  | 90.7 | 100.0 | 85.4  | 88.0  | 63.2  | 63.5 | 70.8 | 62.7 |
| 28 ChrY_8634032_950_en   | 70.4  | 70.4 | 74.4  | 72.4  | 72.4  | 69.8  | 76.1  | 77.2  | 74.8  | 73.3  | 74.3  | 73.3  | 72.5  | 74.8  | 71.4  | 77.1  | 79.5  | 74.3  | 78.2 | 76.2  | 85.1  | 87.5  | 88.5  | 88.7  | 87.2  | 88.0  | 85.4 | 100.0 | 83.8  | 65.5  | 65.5  | 71.5 | 62.4 |      |
| 29 ChrY_21962399_1137_e  | 71.0  | 71.0 | 75.3  | 72.6  | 72.5  | 69.5  | 76.3  | 77.7  | 74.3  | 75.1  | 75.2  | 74.5  | 72.7  | 74.7  | 70.2  | 73.4  | 80.2  | 73.9  | 78.3 | 73.6  | 85.8  | 87.2  | 88.0  | 88.5  | 88.0  | 87.7  | 88.0 | 83.8  | 100.0 | 64.6  | 63.9  | 70.5 | 64.9 |      |
| 30 Chr4_70173370_1049_e  | 62.4  | 62.4 | 64.4  | 64.1  | 67.8  | 66.8  | 67.5  | 66.5  | 66.1  | 67.3  | 68.6  | 67.7  | 67.3  | 63.8  | 64.9  | 72.0  | 69.9  | 67.2  | 69.4 | 68.3  | 66.0  | 66.8  | 64.1  | 64.2  | 63.8  | 63.0  | 63.2 | 65.5  | 64.6  | 100.0 | 74.1  | 69.8 | 67.4 |      |
| 31 Chr19_21213743_913_e  | 62.3  | 62.3 | 63.9  | 63.2  | 65.3  | 63.9  | 68.1  | 66.9  | 65.1  | 65.4  | 68.1  | 66.0  | 64.7  | 65.4  | 64.7  | 70.5  | 74.2  | 66.9  | 74.6 | 70.3  | 69.2  | 69.6  | 63.5  | 63.4  | 63.3  | 63.5  | 63.5 | 65.5  | 63.9  | 74.1  | 100.0 | 73.8 | 67.0 |      |
| 32 Chr21_38522185_383_e  | 70.3  | 70.3 | 74.0  | 71.0  | 73.9  | 73.4  | 74.7  | 75.0  | 73.6  | 70.8  | 72.6  | 72.1  | 70.7  | 68.2  | 70.5  | 82.4  | 74.5  | 74.7  | 75.5 | 73.0  | 71.2  | 71.9  | 70.5  | 71.5  | 70.1  | 70.9  | 70.8 | 71.5  | 70.5  | 69.8  | 73.8  | 0.0  | 69.4 |      |
| 33 Chr4_117329205_488_e  | 62.1  | 62.1 | 64.0  | 63.5  | 67.3  | 66.8  | 66.5  | 66.9  | 66.6  | 63.5  | 65.5  | 64.8  | 64.4  | 60.7  | 64.7  | 70.4  | 66.2  | 65.4  | 65.9 | 66.0  | 64.4  | 65.3  | 63.3  | 63.8  | 63.9  | 61.7  | 62.7 | 62.4  | 64.9  | 67.4  | 67.0  | 69.4 | 0.0  |      |

The four major clusters correspond to 1-3. "ERV3-like" sequences, consisting of ERV3 (1-2) and RRHERVI (3) elements and 4. "HERV-E-like"



# Similarity of ERV3-like and HERV-like sequences in pcp

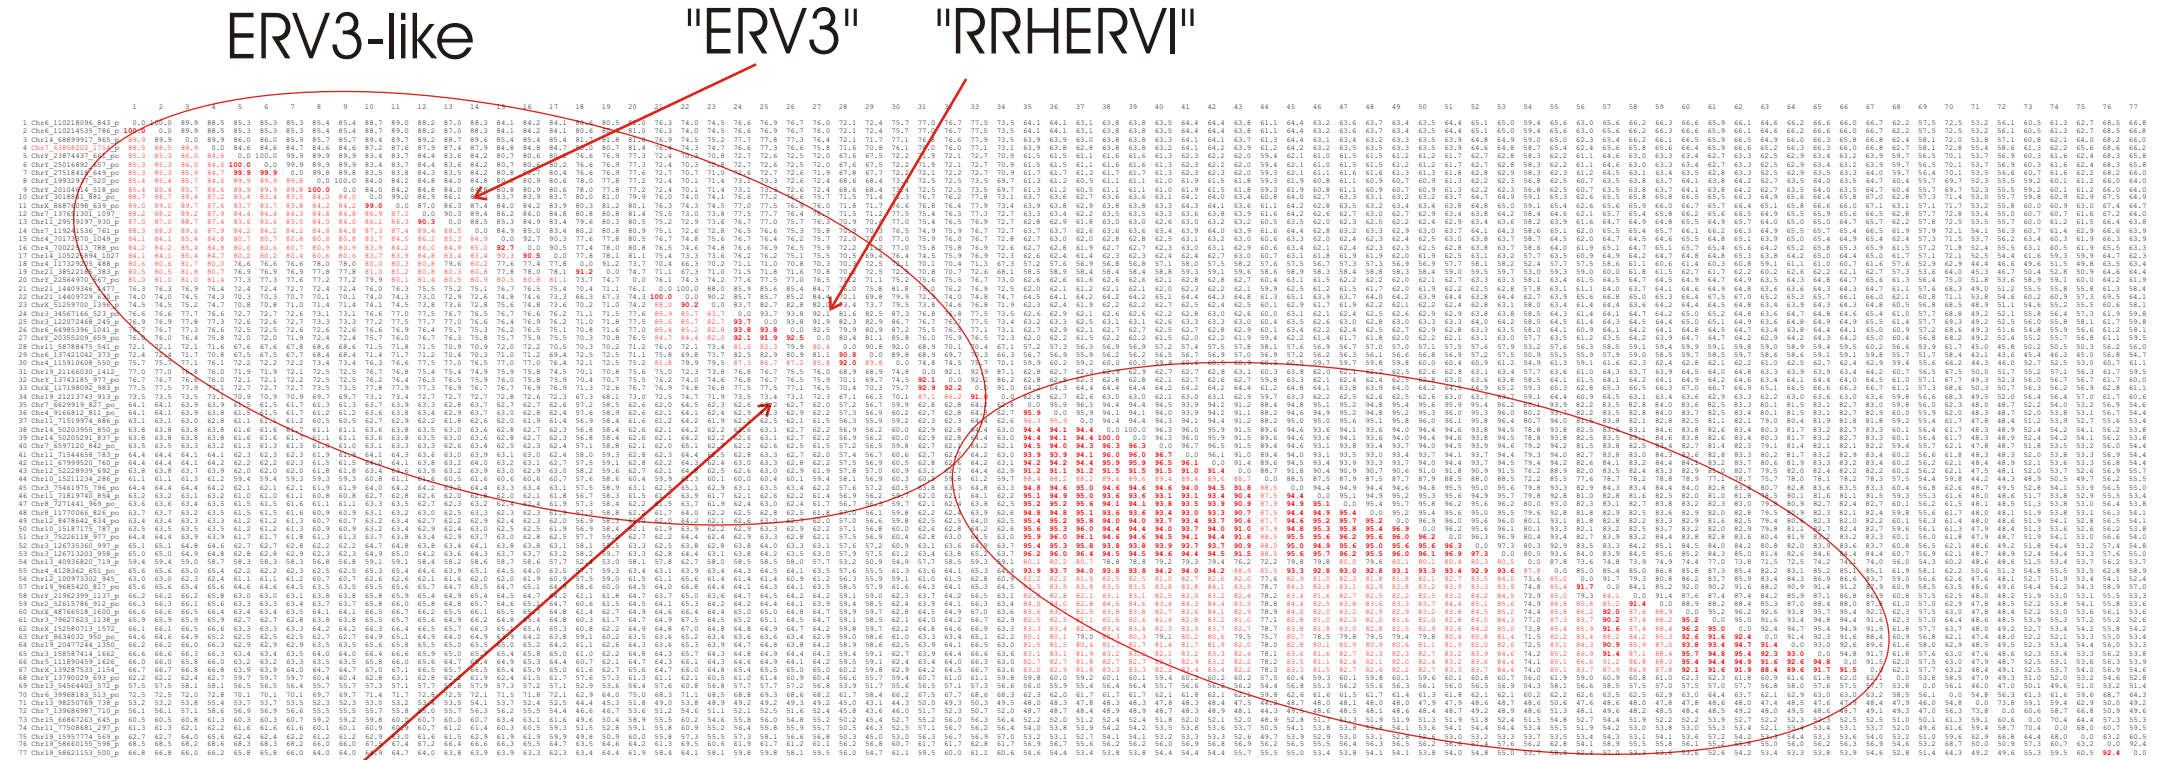

Similarity of ERV3-like sequences >80% are shown in red.

HERV-like

Similarities >80% are shown in red.

CLUSTAL W (1.81) multiple sequence alignment

```

                    50:1                                100:4
5ltr  TGAGGCAGGAAATATAAAAGGAAAAACAAGTAAAGGGAAAACAAGTCCTTCCCTGATCAG
3ltr  TGAAGCAGGAAATATAAAAGGAAAAACAAGTAAAGGGAAAACAAGTCCTTTCCTGACCAG
      ***
                    150:5
5ltr  TCTGACTCACTCCAAAGTCCTGCTGGAGCTATGATAACATATCTGCAAGGCCAGGCAGG
3ltr  TCTGACTCACTCCAAAGTCCTGCTGGAGCTATGATA--ATTATCTGCAAGGCCAGGCAGG
      *****
                    200:5
5ltr  GACCCCAAAGAATGGGCTCCAGGAGCAGAGATGAGAAAAACAAGTTCTCCTTATCAGTT
3ltr  GGCTCCGAAGGAGTGGGCTCCAGGAGCAGGGATGAGAAAAACAAGTTCTCCTTATCAGTT
      * * * * *
                    250:1
5ltr  TCCGC-CTTGAATTCCTTCCCATACCATTATCTTTGTTCTGCTCTCACAACATTTT
3ltr  TCCCTGTTTGAAATTCTCTCCCATACATTATCTTTGTTCTGCTCTCACAACATTTT
      ***
                    300:5
5ltr  TGTAACTATTCTGCAAGTTTGCAAAGATTTATAAGTTCCTGTTTTCTTCTGTAGCA
3ltr  TGTAACTATTCTGCAAGTCTGTAAGATTTTGTAAAGTTCCTGTTTTCTTCTGTAGCA
      *****
                    350:4                                400:1
5ltr  CGGCAAGGTCACAAGACATGCTTAAGTAAGTAGGGTCATGTTGCAAATCCTGTTGTAAA
3ltr  TGGCAAGGTCACAAGACATGTTAAGTAAGTAGGCTCATGTTGCAAATCCTGTTGTAAA
      *****
                    450:10
5ltr  ACCTGTCACGGTATGATTAAGTCTTTGTTCTGCTTCTGTAAGACTGCTTTCCTGTCTC
3ltr  ACCTGTCACGGTATGATTAAGTCTTTGTTCTGCTTCTGTAAGACTGCTTTCCTGTCTC
      *****
                    500:4
5ltr  ACAGGTTTCATGCCAAAACCTGACCCGCCCTGTTGGTTGCATGTATAAAAGTCAAGCC
3ltr  GCAGGTTTTGCGCCAAAACCCGACTTGCCCTGCCTGATGCATGTATAAAAGTCAAGCC
      *****
                    550:7
5ltr  CTGTCTATTGTTACAGGCTCAGCCTTTGGATGTTTCATCGGCTGGGCTGGTGGTCACTAAA
3ltr  CTGTCTTTGTTACAGGCTCAGCCTTTGGATGTTAATCCGCTGGGCCAGTGGCCACCTAAA
      *****
                    591:4
5ltr  TAAAATCCTCCTGTTCCACCAAGTGGTCTCTCCAGCCTCCTGATTCCCACAACA
3ltr  TAAAACCTTCTGTTGCACCCAGTGATCTCTCCGGCCTCCTGATTCCCACAACA
      *****

```

Identities : 540 of Total 591

## ConSite analysis of ERV3 LTRs

5'LTR

Predicted sites unique to the 5'LTR are shown in red.

|            |     |   |                |
|------------|-----|---|----------------|
| c-FOS      | 1   | R | TGAGGCAG       |
| HFH-2      | 20  | R | GGAAAAACAAGT   |
| c-REL      | 20  | R | GGAAAAACAA     |
| HFH-2      | 24  | R | AAACAAGTAAAG   |
| HNF-3beta  | 24  | R | AAACAAGTAAAG   |
| Sox-5      | 24  | N | AAACAAG        |
| FREAC-4    | 37  | N | GAAAACAA       |
| Sox-5      | 39  | N | AAACAAG        |
| c-FOS      | 62  | N | CTGACTCA       |
| c-FOS      | 63  | R | TGACTCAC       |
| Evi-1      | 86  | N | GAGCTATGATAACA |
| Sox-5      | 95  | N | TAACATT        |
| SOX17      | 96  | N | AACATTATC      |
| Thing1-E47 | 101 | N | TATCTGCAAG     |
| AML-1      | 121 | R | GACCCCAA       |
| Sox-5      | 128 | N | AAAGAAT        |
| c-FOS      | 152 | N | ATGAGAAA       |
| HFH-2      | 155 | R | AGAAAAACAAGT   |
| Sox-5      | 159 | N | AAACAAG        |
| Sox-5      | 192 | R | ATTCTTT        |
| Sox-5      | 208 | R | ATTATTC        |
| HFH-1      | 210 | N | TATTCTTTGTT    |
| HFH-2      | 210 | N | TATTCTTTGTTT   |
| HNF-3beta  | 210 | N | TATTCTTTGTTT   |
| Sox-5      | 211 | R | ATTCTTT        |
| SOX17      | 212 | N | TTCTTTGTT      |
| Sox-5      | 230 | N | CAACTAT        |
| HFH-2      | 231 | N | AACTATTTTTGT   |
| HNF-3beta  | 231 | N | AACTATTTTTGT   |
| MEF2       | 233 | N | CTATTTTTGT     |
| Sox-5      | 235 | R | ATTTTTG        |
| E4BP4      | 237 | N | TTTTGTAACTA    |
| Sox-5      | 242 | N | TAACTAT        |
| E4BP4      | 265 | R | AGATTTCATAA    |
| HLF        | 266 | N | GATTTCATAAGT   |
| RORalfa-1  | 301 | N | GGCAAGGTCA     |
| E4BP4      | 318 | R | TGCTTAAGTAA    |
| E4BP4      | 321 | N | TTAAGTAAGAT    |
| RORalfa-1  | 329 | N | GATAGGGTCA     |
| HLF        | 351 | R | TGTTGTAAAACC   |
| c-FOS      | 372 | N | ATGATTAA       |
| SOX17      | 376 | N | TTAACTGTC      |
| SOX17      | 382 | N | GTCTTTGTT      |
| E4BP4      | 395 | N | TTCTGTAAGAC    |
| c-FOS      | 414 | R | TGTCTCAC       |
| Thing1-E47 | 429 | R | ATGCCAAAAA     |
| Thing1-E47 | 436 | R | AAACCTGACC     |
| Myf        | 448 | R | CCCCTGTTGGTT   |
| RORalfa-1  | 466 | N | ATAAAAAGTCA    |
| Irf-1      | 468 | N | AAAAGTCAAGCC   |
| SOX17      | 482 | N | GTCATTGTT      |
| HFH-1      | 484 | N | CATTGTTTCAGG   |
| Sox-5      | 485 | R | ATTGTTC        |

|               |     |   |                |
|---------------|-----|---|----------------|
| AML-1         | 524 | N | CTGGTGGTC      |
| RORalfa-2     | 530 | R | GTCACCTAAATAAA |
| RORalfa-1     | 531 | R | TCACCTAAAT     |
| HFH-3         | 533 | R | ACCTAAATAAAA   |
| Max           | 556 | N | CACCAAGTGG     |
| Myc-Max       | 556 | N | CACCAAGTGGT    |
| Myc-Max       | 557 | R | ACCAAGTGGTC    |
| Tallbeta-E47S | 557 | R | ACCAAGTGGTCT   |
| Max           | 558 | R | CCAAGTGGTC     |
| USF           | 558 | R | CCAAGTG        |
| AML-1         | 559 | N | CAAGTGGTC      |
| ARNT          | 559 | R | CAAGTG         |
| ARNT          | 559 | N | CAAGTG         |
| USF           | 559 | N | CAAGTGG        |
| n-MYC         | 559 | R | CAAGTG         |
| n-MYC         | 559 | N | CAAGTG         |

### 3' LTR

|            |     |   |                |
|------------|-----|---|----------------|
| HFH-2      | 20  | R | GGAAAAACAAGT   |
| c-REL      | 20  | R | GGAAAAACAA     |
| HFH-2      | 24  | R | AAACAAGTAAAG   |
| HNF-3beta  | 24  | R | AAACAAGTAAAG   |
| Sox-5      | 24  | N | AAACAAG        |
| FREAC-4    | 37  | N | GAAAAACAA      |
| Sox-5      | 39  | N | AAACAAG        |
| Thing1-E47 | 49  | R | TTTCCTGACC     |
| c-FOS      | 62  | N | CTGACTCA       |
| c-FOS      | 63  | R | TGACTCAC       |
| HNF-1      | 90  | R | TATGATAATTATCT |
| Thing1-E47 | 99  | N | TATCTGCAAG     |
| c-FOS      | 150 | N | ATGAGAAA       |
| HFH-2      | 153 | R | AGAAAAACAAGT   |
| Sox-5      | 157 | N | AAACAAG        |
| Sox-5      | 203 | N | TAACATT        |
| Sox-5      | 207 | R | ATTATTC        |
| HFH-1      | 209 | N | TATTCCTTTGTT   |
| HFH-2      | 209 | N | TATTCCTTTGTTT  |
| HNF-3beta  | 209 | N | TATTCCTTTGTTT  |
| Sox-5      | 210 | R | ATTCTTT        |
| SOX17      | 211 | N | TTCTTTGTT      |
| Sox-5      | 229 | N | CAACTAT        |
| HFH-2      | 230 | N | AACTATTTTTGT   |
| HNF-3beta  | 230 | N | AACTATTTTTGT   |
| MEF2       | 232 | N | CTATTTTTGT     |
| Sox-5      | 234 | R | ATTTTTG        |
| E4BP4      | 236 | N | TTTTGTAACTA    |
| Sox-5      | 241 | N | TAACTAT        |
| Thing1-E47 | 255 | N | AGTCTGTAAA     |
| FREAC-4    | 260 | N | GTAAAGAT       |
| E4BP4      | 267 | N | TTTTGTAAGTT    |
| HFH-2      | 277 | N | TCTTGTTTTTCT   |
| HFH-3      | 277 | N | TCTTGTTTTTCT   |
| FREAC-2    | 278 | R | CTTGTTTTTCTTTC |
| Sox-5      | 278 | R | CTTGTTT        |
| E4BP4      | 289 | N | TTCTGTAGCAT    |
| RORalfa-1  | 300 | N | GGCAAGGTCA     |
| HFH-2      | 314 | N | ACATGTTTAAGT   |
| HFH-3      | 314 | N | ACATGTTTAAGT   |
| FREAC-2    | 315 | R | CATGTTTAAGTAAG |
| FREAC-4    | 316 | R | ATGTTTAA       |

|            |     |   |                 |
|------------|-----|---|-----------------|
| E4BP4      | 320 | N | TTAAGTAAGGT     |
| HLF        | 350 | R | TGTTGTAAAACC    |
| c-FOS      | 371 | N | ATGATTAA        |
| E4BP4      | 394 | N | TTCTGTAAGAC     |
| c-FOS      | 408 | R | TTTCTCAC        |
| Brachyury  | 409 | R | TTCTCACCTCG     |
| E2F        | 424 | N | TTTTGCGC        |
| E2F        | 428 | R | GCGCCAAA        |
| RORalpha-1 | 465 | N | ATAAAAAGTCA     |
| Irf-1      | 467 | N | AAAAGTCAAGCC    |
| SOX17      | 481 | N | GTCTTTGTT       |
| HFH-3      | 532 | R | ACCTAAATAAAA    |
| HFH-2      | 537 | R | AATAAACCTTC     |
| NRF-2      | 543 | R | ACCTTCCTGT      |
| Chop-cEBP  | 548 | R | CCTGTTGCACCC    |
| RXR-VDR    | 553 | R | TGCACCCAGTGATCT |

Search settings are described in Materials and Methods.

# Transcription factor binding sites predicted by ConSite

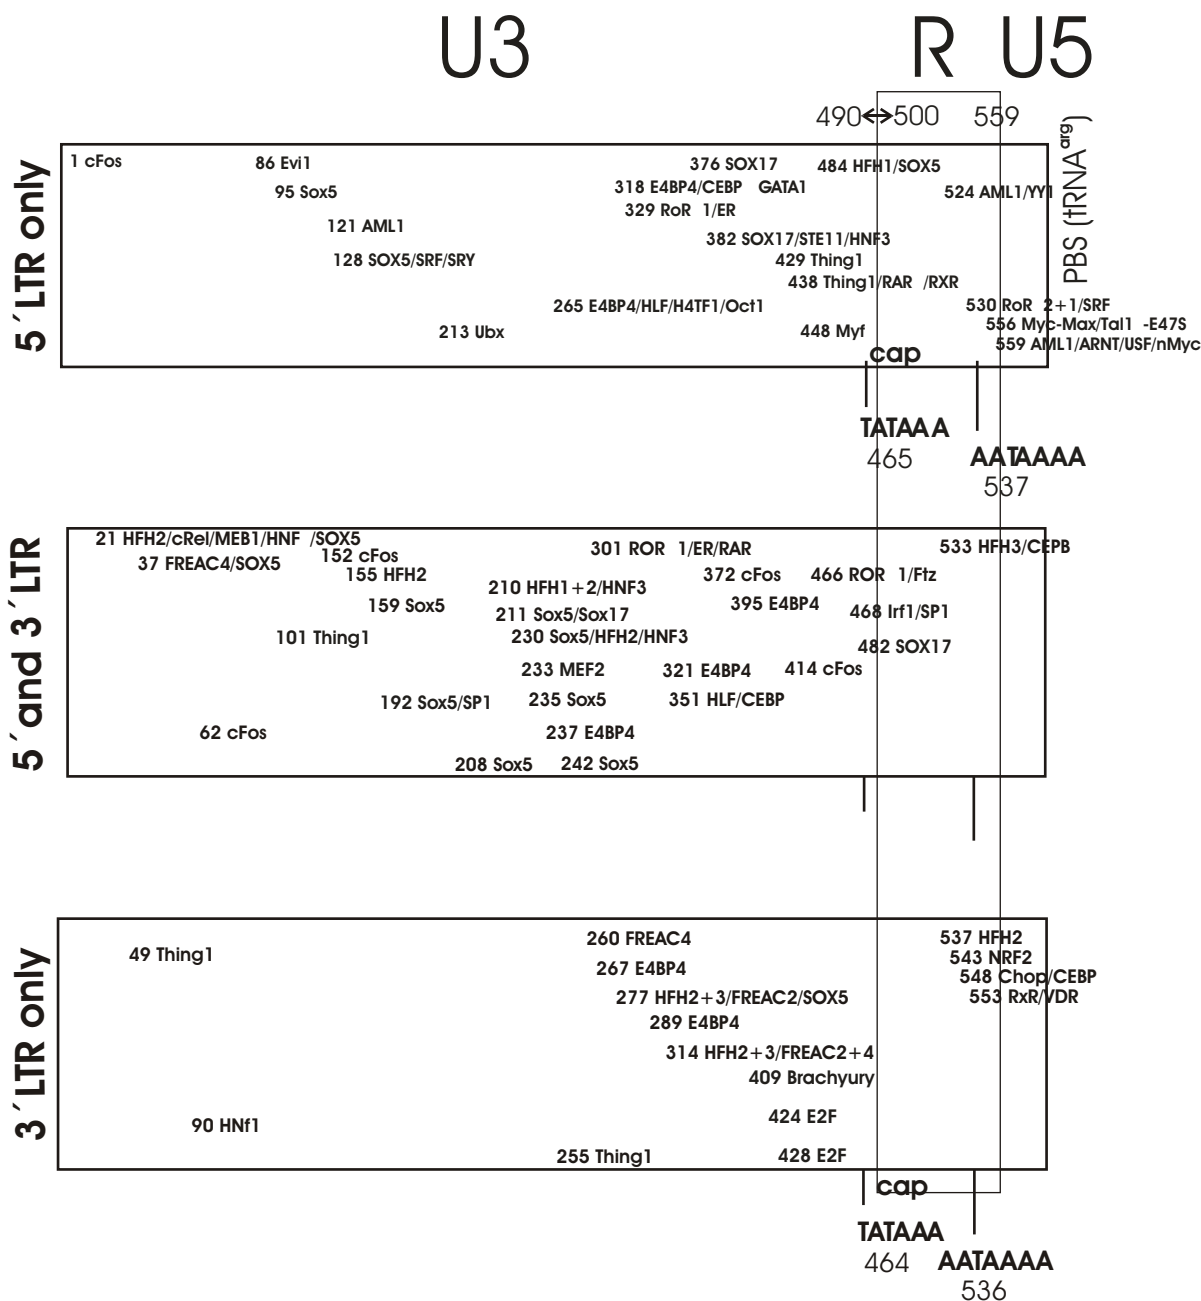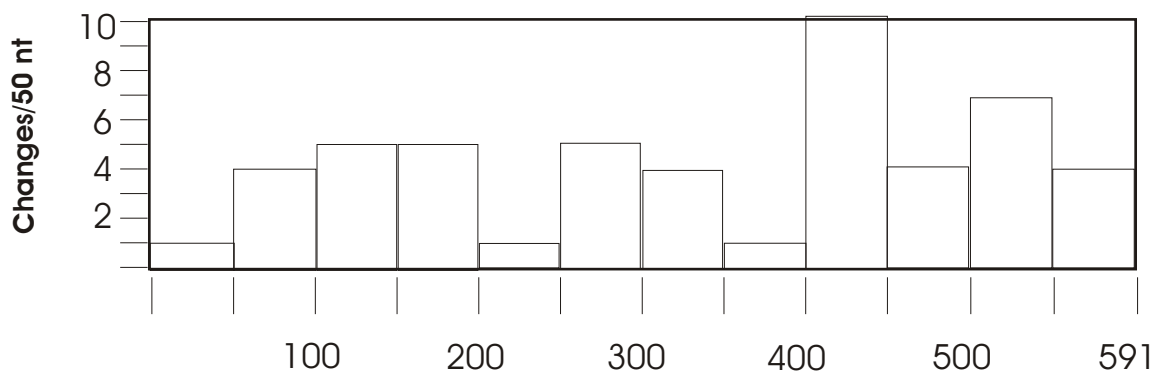

**Distribution of 5'/3' differences**

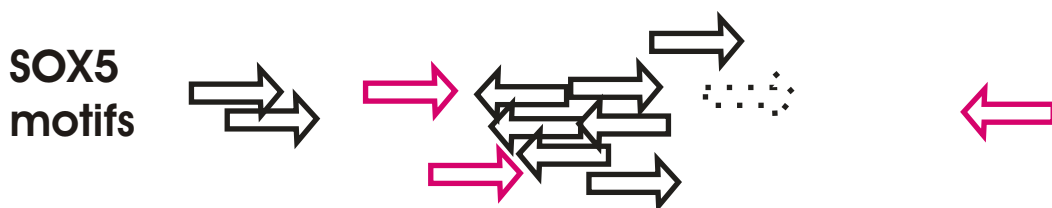

Red arrows depict predicted SOX5 sites unique to the 5' LTR, black ones those common between 5' and 3' LTR whereas the dotted LTR is unique to the 3' LTR.

!\$ CHR: 4  
!\$ CHAINSTART: 70022513  
!\$ STRAND: S  
!\$ CHAIN:  
SubGene PBS, type B, score=1 , hotspot 70022513  
PBS:B (tRNA<sup>Lys</sup>12-HSRV,MPMV,SRV1,VILV,): Score=1 at 70022513 frame 2  
[70022513-70022496]  
TGGcgcccaacgtggggc scored against  
tggggcccaaggcaggac (18 bases)

!\$ CHR: 4  
!\$ CHAINSTART: 115910608  
!\$ STRAND: S  
!\$ CHAIN:  
SubGene PBS, type CD, score=153 , hotspot 115910193  
PBS:CD (tRNA<sup>Pro</sup>-MLV,HTLV,HuersP): Score=153 at 115910193 frame 2  
[115910193-115910176]  
TGGgggctcgtccgggat scored against  
tgggggctcatccgggat (18 bases)

!\$ CHR: 6  
!\$ CHAINSTART: 39968183  
!\$ STRAND: S  
!\$ CHAIN:  
SubGene PBS, type CD, score=96 , hotspot 39968183  
PBS:CD (tRNA<sup>Pro</sup>-MLV,HTLV,HuersP): Score=96 at 39968183 frame 3  
[39968183-39968166]  
TGGgggctcgtccgggat scored against  
tgggggctcatccaggat (18 bases)

!\$ CHR: 7  
!\$ CHAINSTART: 63858202  
!\$ STRAND: S  
!\$ CHAIN:  
SubGene PBS, type C, score=141 , hotspot 63857606  
PBS:C (tRNA<sup>Arg</sup>-ERV3, ver020308, Snakehead RV): Score=141 at 63857606  
frame 2 [63857606-63857589]  
TGGtgagccagccaggag scored against  
tggcgagccagccaggag (18 bases)

!\$ CHR: 7  
!\$ CHAINSTART: 137651301  
!\$ STRAND: S  
!\$ CHAIN:  
SubGene PBS, type CD, score=152 , hotspot 137651125  
PBS:CD (tRNA<sup>Pro</sup>-MLV,HTLV,HuersP): Score=152 at 137651125 frame 3  
[137651125-137651108]  
TGGgggctcgtccgggat scored against  
tgggggctcgcccgggat (18 bases)

!\$ CHR: X  
!\$ CHAINSTART: 51259700  
!\$ STRAND: S  
!\$ CHAIN:  
SubGene PBS, type CD, score=151 , hotspot 51259175  
PBS:CD (tRNA<sup>Pro</sup>-MLV,HTLV,HuersP): Score=151 at 51259175 frame 2  
[51259175-51259158]  
TGGgggctcgtccgggat scored against  
tgggggctcatccgggat (18 bases)

!\$ CHR: Y

!\$ CHAINSTART: 3018841  
!\$ STRAND: S  
!\$ CHAIN:  
SubGene PBS, type C, score=200 , hotspot 3018841  
PBS:C (tRNAArg-ERV3, ver020308, Snakehead RV): Score=200 at 3018841  
frame 3 [3018841-3018824]  
TGGtgagccagccaggag scored against  
tggtgagccagccaggag (18 bases)

!\$ CHR: 11  
!\$ CHAINSTART: 29579197  
!\$ STRAND: P  
!\$ CHAIN:  
SubGene PBS, type CD, score=64 , hotspot 29579839  
PBS:CD (tRNAPro-MLV,HTLV,HuersP): Score=64 at 29579839 frame 2  
[29579839-29579856]  
TGGgggctcgtccgggat scored against  
tgggggctcctgtgggat (18 bases)

!\$ CHR: 21  
!\$ CHAINSTART: 14409346  
!\$ STRAND: P  
!\$ CHAIN:  
SubGene PBS, type CD, score=118 , hotspot 14409729  
PBS:CD (tRNAPro-MLV,HTLV,HuersP): Score=118 at 14409729 frame 2  
[14409729-14409746]  
TGGgggctcgtccgggat scored against  
tgggggctcatctgggat (18 bases)

manually added item:

The RRHERVI/HERV15 element at chrY\_13743185 (HERV15Yq1)  
Has a PBS highly similar to tRNAIle-RTVLI, RRHERV-I and HML5  
TGGcccatatggggattg  
tggcccagatgggggttg
